# Supplementary material for: The SIRT5-SUCLG2 desuccinylation axis delays ovarian aging via a mitochondrial-epigenetic regulatory mechanism
Source: Research Square preprint supplement (doi:10.21203/rs.3.rs-7030863/v1), 2025-08-06
Supplement: Supplementary file 1 [file 983936e219c1b410a599aefa.pdf]

1    **Extended Date Figures**

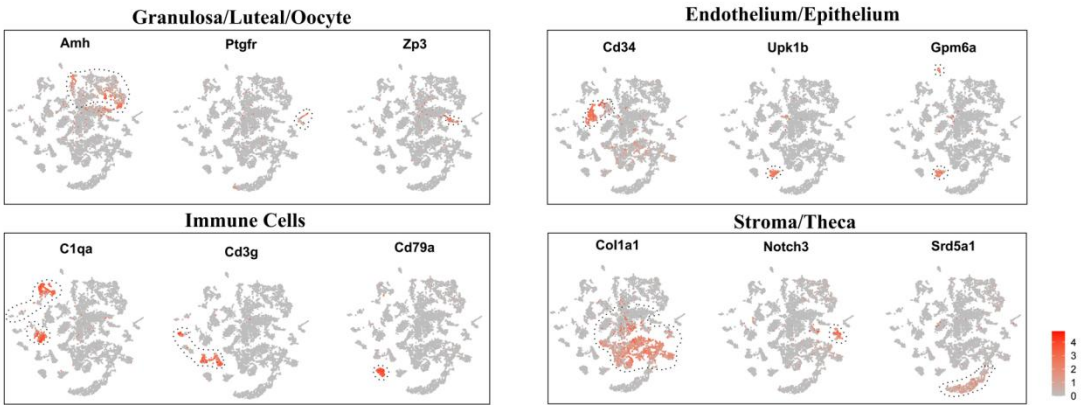

2

3    **Extended Data Fig. 1|t-SNE plots illustrating the expression of mark genes in ovarian cells, with color**  
4    **denoting the level of expression.**

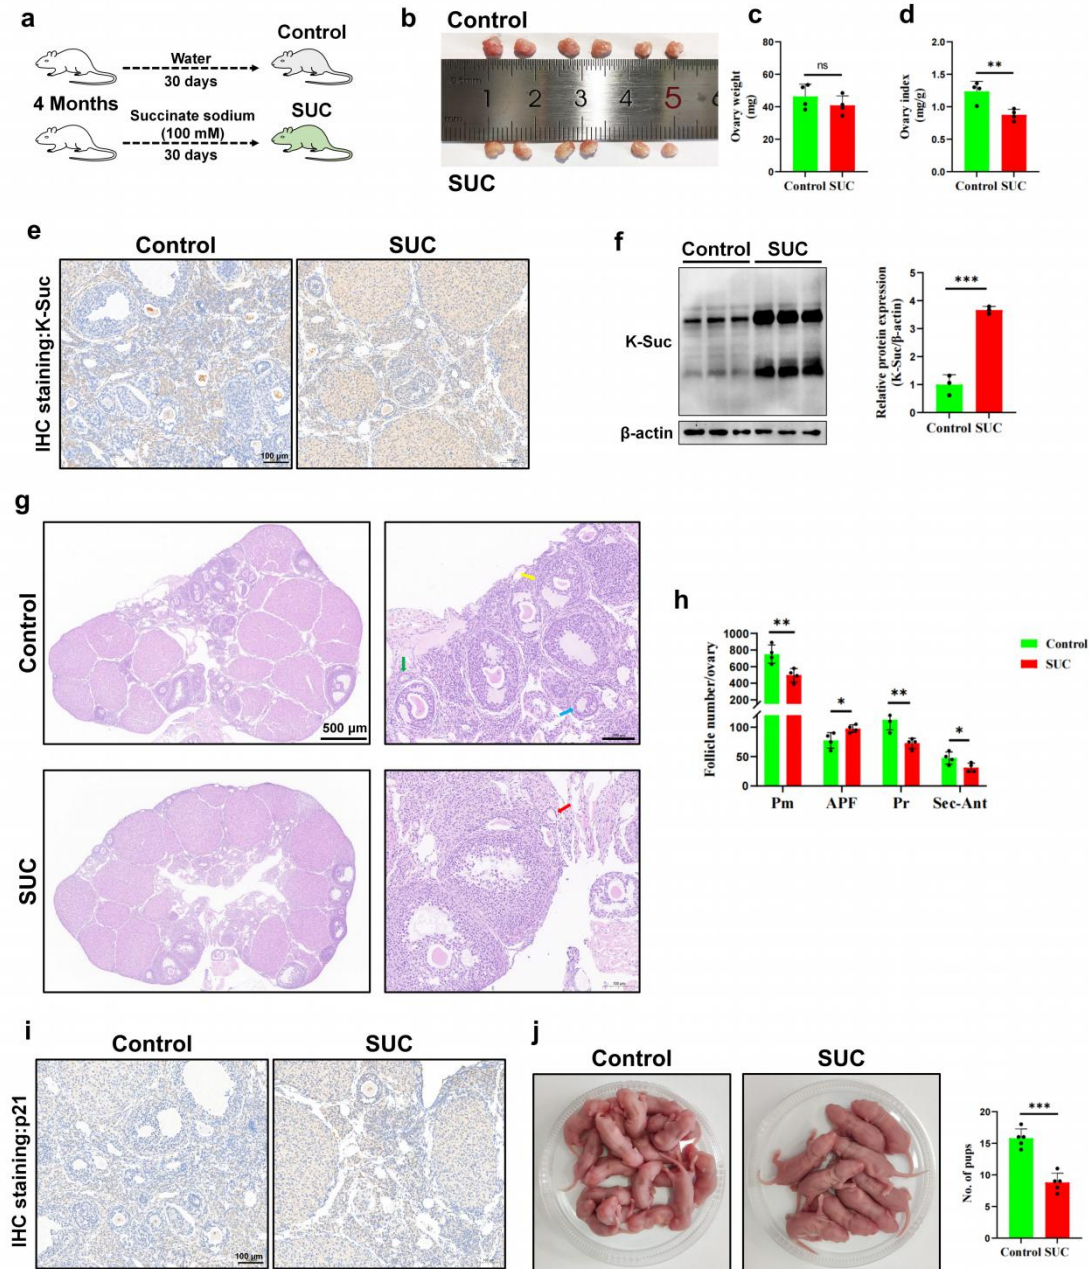

**Extended Data Fig. 2|Excessive Ksuc accelerates mouse ovarian aging.** **a**, Schematic showing continuous feeding of 4-month-old female mice with water and exogenous succinate sodium (100 mM) for 30 days. **b-d**, Images of the ovaries of female mice in the control group and SUC group were taken (**b**), and the ovary weight (**c**) and ovary index (ovary weight/body weight) (**d**) were measured. (n = 4 females per group). **e**, Representative IHC images of the ovaries of control and SUC female mice with anti-Succinylation (n = 4 per group). Scale bars, 100  $\mu$ m. **f**, Lysine succinylation levels were determined by immunoblot in the ovaries of control and SUC female mice, and the quantifications were presented as mean  $\pm$  SEM of three independent experiments. **g**, Follicles were classified into primordial (Pm, yellow arrows), activated primordial (APF: oocyte diameter greater than 20  $\mu$ m without cuboidal granulosa cells, red arrows), primary (Pr, green arrows), or secondary-antral (Sec-Ant, blue arrows) stages. Scale bars, 500  $\mu$ m and 100  $\mu$ m. **h**, Quantification of the number of Follicular stages per ovary in the control and SUC groups. **i**, Representative IHC images of the ovaries of control and SUC female mice with anti-p21 (n = 4 per group). Scale bars, 100  $\mu$ m. **j**, Mean pup numbers of Control and SUC mice. (n = 6 females per group). Statistical analysis was performed using unpaired, two-tailed Student's t test. \*  $P$  < 0.05, \*\*  $P$  < 0.01.

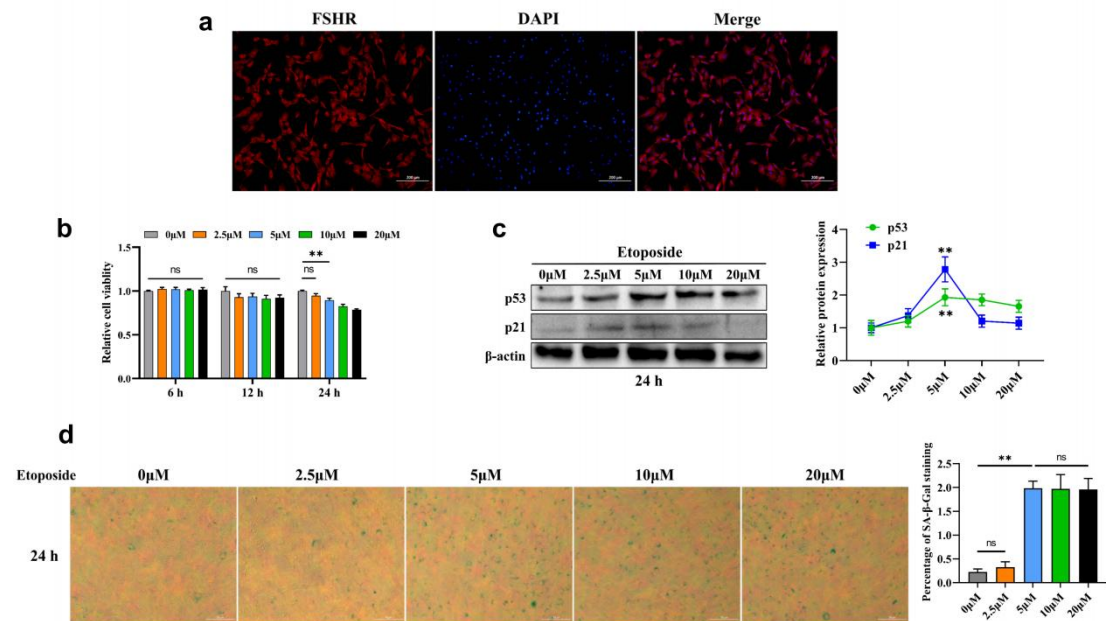

**Extended Data Fig. 3|Etoposide induces senescence of ovarian GCs *in vitro*.** **a**, GCs were identified by FSHR specific immunofluorescence staining. **b**, The effect of Etoposide on the viability of GCs was determined by CCK-8, and the quantifications were presented as mean  $\pm$  SEM of five independent experiments. **c**, p53 and p21 protein levels were determined by immunoblot in GCs treated with different concentrations of Etoposide for 24 h, and the quantifications were presented as mean  $\pm$  SEM of three independent experiments. **d**, The levels of  $\beta$ -galactosidase were determined in GCs after treated with different concentrations of Etoposide for 24 h, and the quantifications were presented as mean  $\pm$  SEM of three independent experiments. Statistical analysis was performed using unpaired, two-tailed Student's t test. \*  $P < 0.05$ , \*\*  $P < 0.01$ .

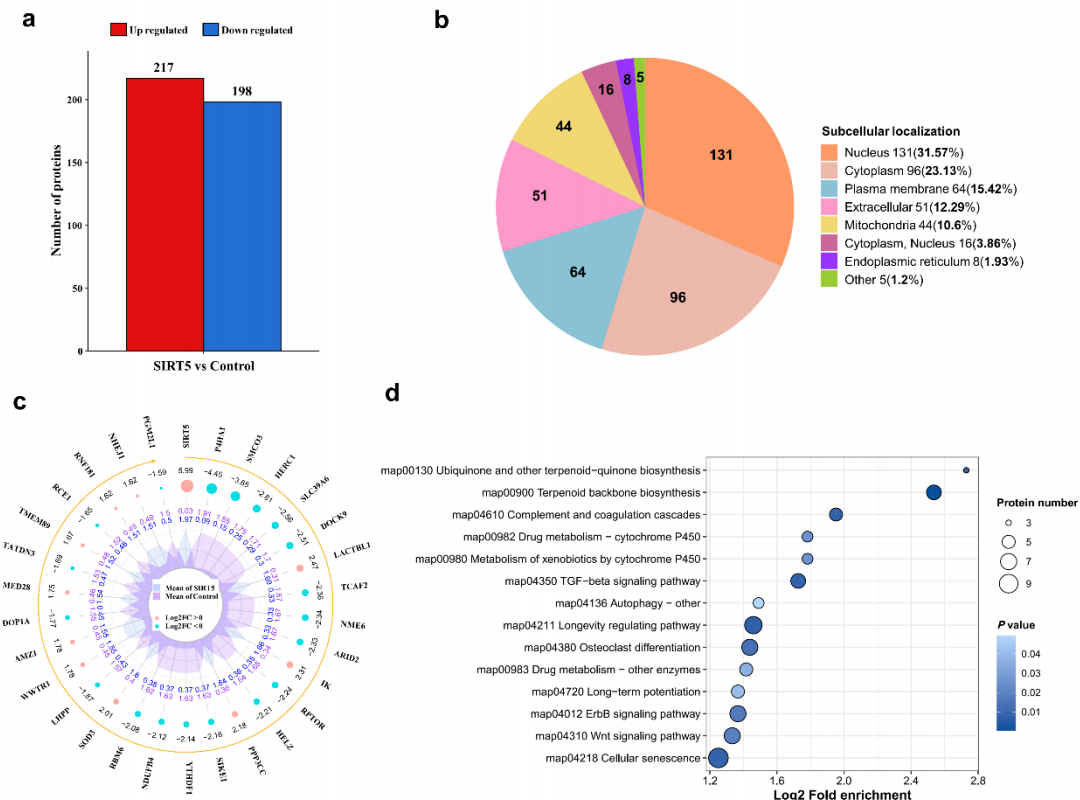

**Extended Data Fig. 4|SIRT5 affects the protein expression of ovarian GCs.** **a**, Statistical analysis differentially expressed proteins in 4D proteomics data. **b**, Subcellular structure types of differentially expressed proteins. Different colors represent the corresponding subcellular structure information, and the legend shows the name and



32 proportion of the corresponding species. **c.** Radar plot of relative expression levels of Top 30 differential expressed  
 33 proteins in the two groups. The first circle represents the name of the differential protein. The second circle  
 34 indicates that the absolute value of the difference protein Log<sub>2</sub> Fold change is sorted from large to small. The third  
 35 circle represents the differential expression change Ratio value of the comparison group of Log<sub>2</sub> conversion. Pink  
 36 indicates up-regulation, blue indicates down-regulation, and the larger point indicates the larger value. The fourth  
 37 circle represents the average quantitative value of the two groups. **d.** KEGG pathway enrichment analysis of  
 38 differentially expressed proteins in the two groups.

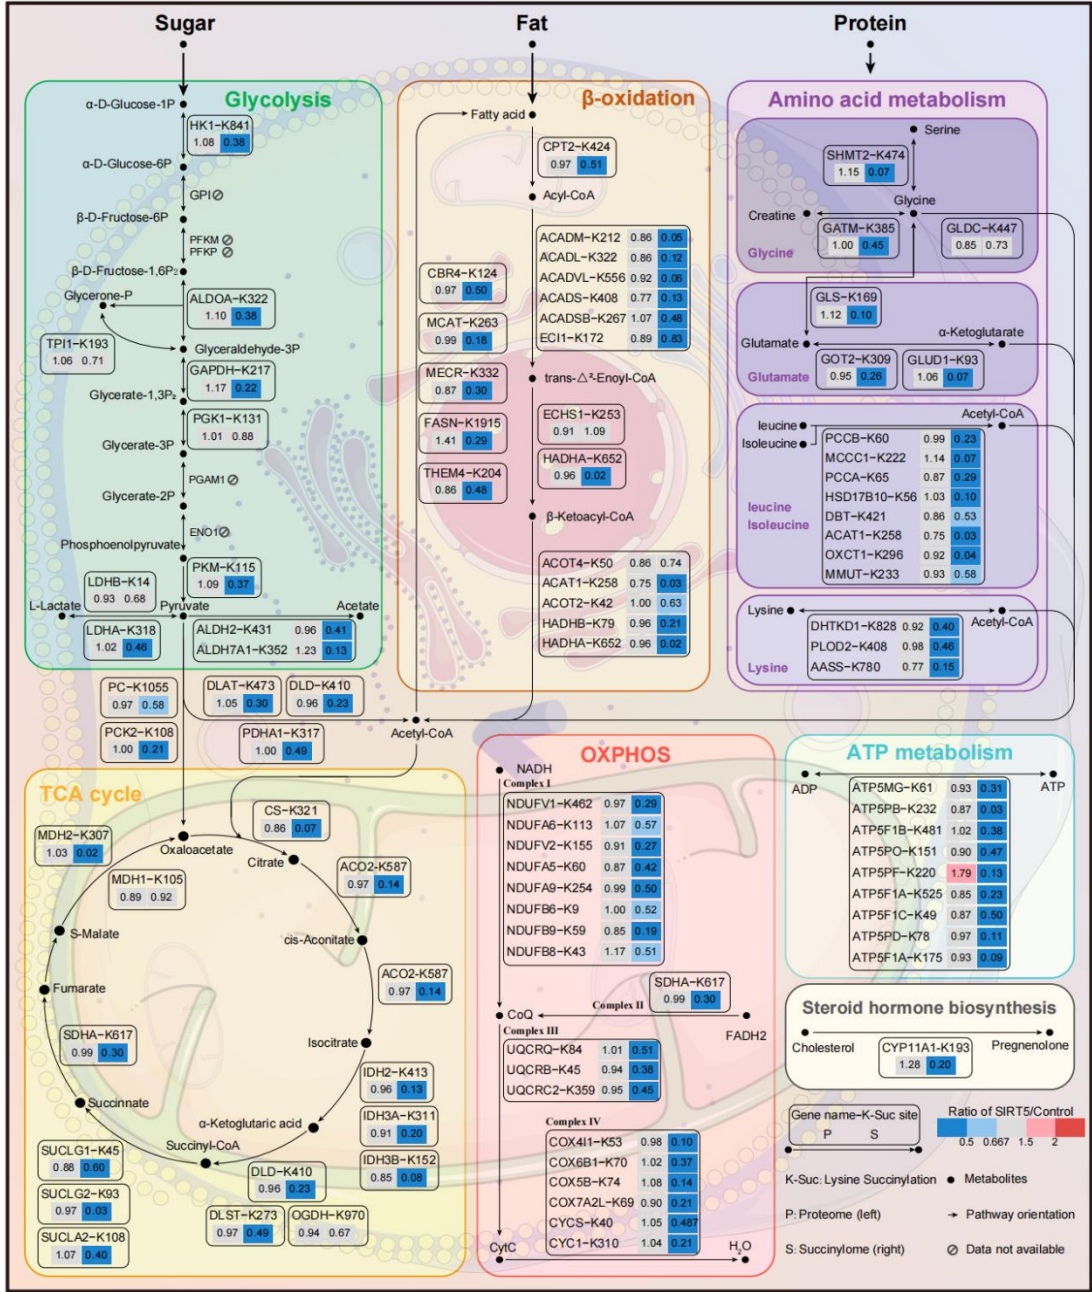

39  
 40 Extended Data Fig. 5|Panoramic overview of metabolic pathways based on 4D succinylation proteomics  
 41 data.

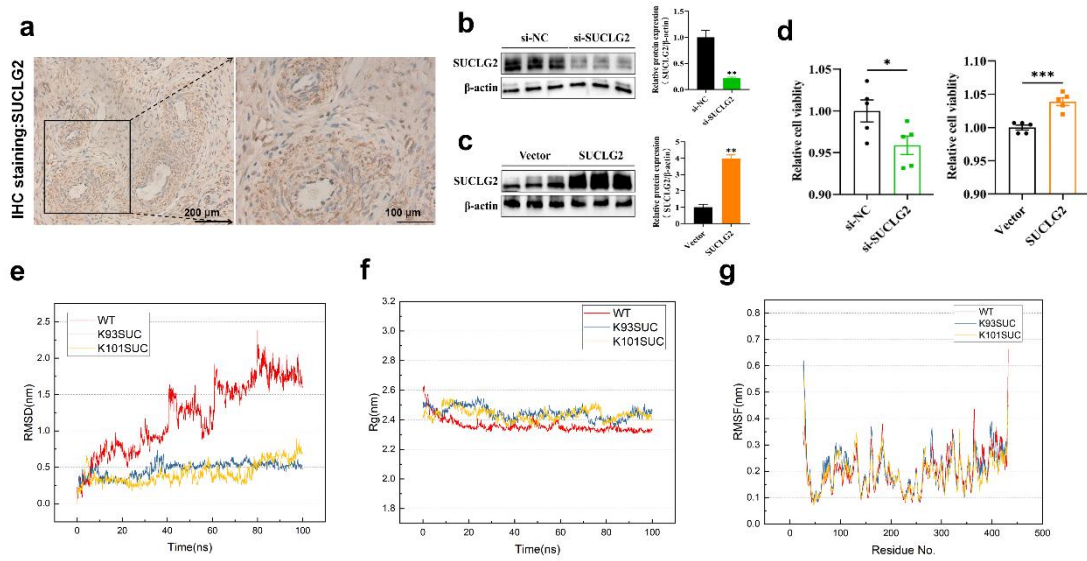

**Extended Data Fig. 6|SUCLG2 influences the viability of GCs, and the succinylation of SUCLG2 at residues K93 and K101 affects its stability.** **a**, Representative IHC images of the ovaries of bovine with anti-SUCLG2 (n = 3 ovaries per group). Scale bars, 200  $\mu$ m and 100  $\mu$ m. **b,c**, SUCLG2 protein levels were determined by immunoblot in granulosa cells stably transfected with si-SUCLG2 or si-NC (**b**), overexpressing SUCLG2 or vector (**c**) (n = 3 per group). **d**, The effect of interference or overexpression of SUCLG2 on the viability of GCs was determined by CCK-8, and the quantifications were presented as mean  $\pm$  SEM of five independent experiments. **e**, The root mean square deviation (RMSD) of the ligand GDP during molecular dynamics simulation in the WT, K93 succinylated, K101 succinylated SUCLG2 model. **f**, The radius of gyration (Rg) of each model is showed during molecular dynamics simulation. **g**, The root mean square fluctuation (RMSF) of each model is showed during molecular dynamics simulation. Statistical analysis was performed using two-tailed Student's t test (**b-d**). \*  $P < 0.05$ , \*\*  $P < 0.01$ , \*\*\*  $P < 0.001$ .

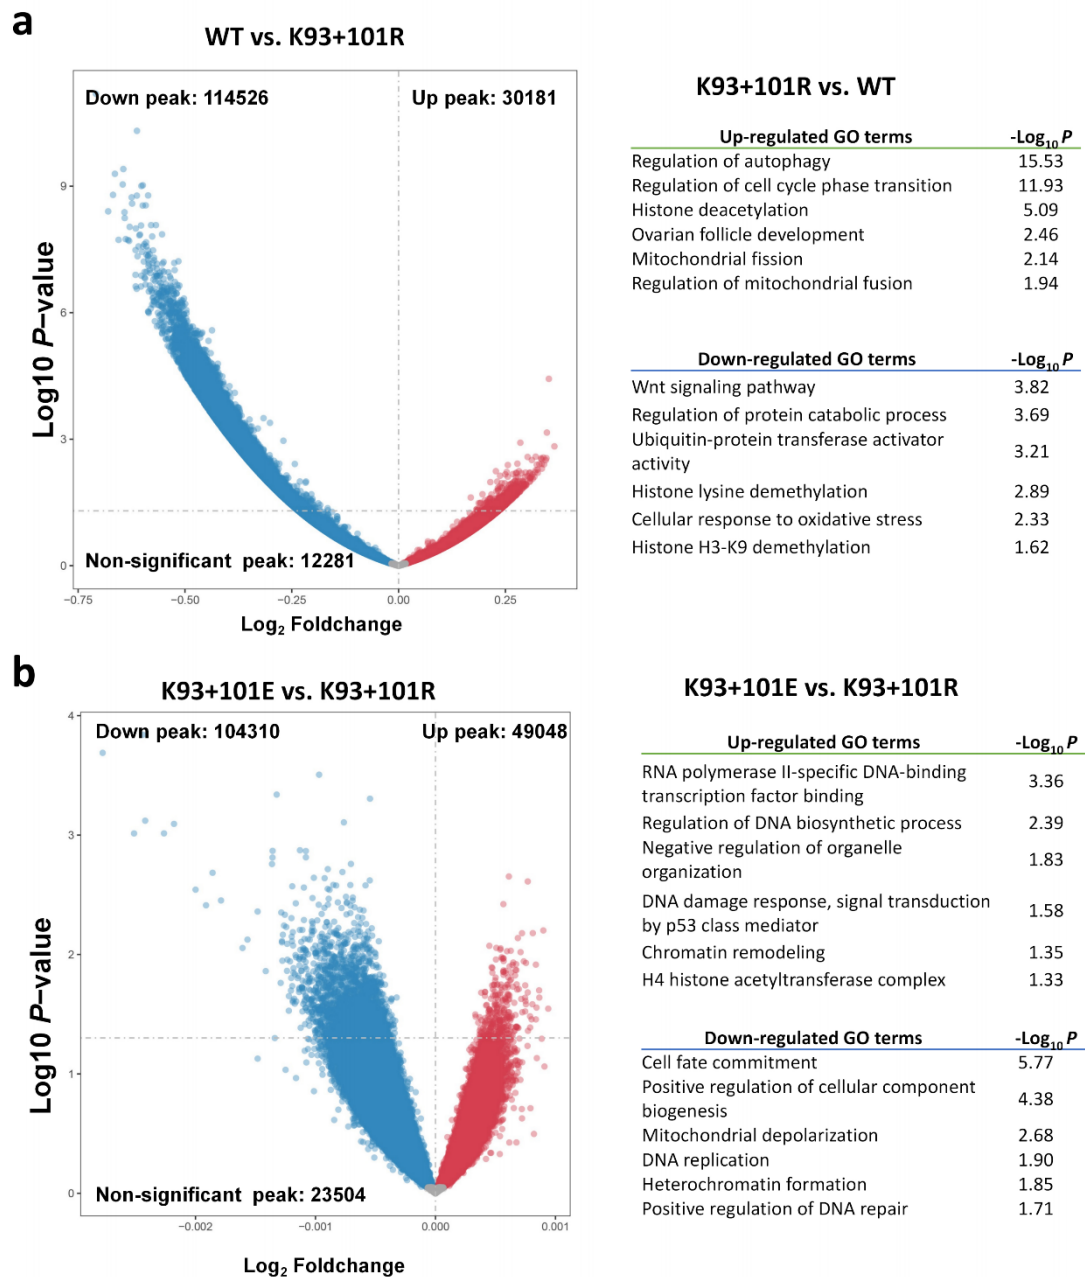

**Extended Data Fig. 7|SUCLG2 succinylation affects chromatin binding to histone H4. a,** Left: Volcano plot of quantified the number of H4K8ac differential binding peaks between WT and SUCLG2<sup>K93+101R</sup> mutant. Right: The up-regulated or down-regulated peaks enriched Gene Ontology (GO) terms are shown between WT and SUCLG2<sup>K93+101R</sup> mutant. **b,** Left: Volcano plot of quantified the number of H4K8ac differential binding peaks between SUCLG2<sup>K93+101E</sup> mutant and SUCLG2<sup>K93+101R</sup> mutant. Right: The up-regulated or down-regulated peaks enriched Gene Ontology (GO) terms are shown between SUCLG2<sup>K93+101E</sup> mutant and SUCLG2<sup>K93+101R</sup> mutant.

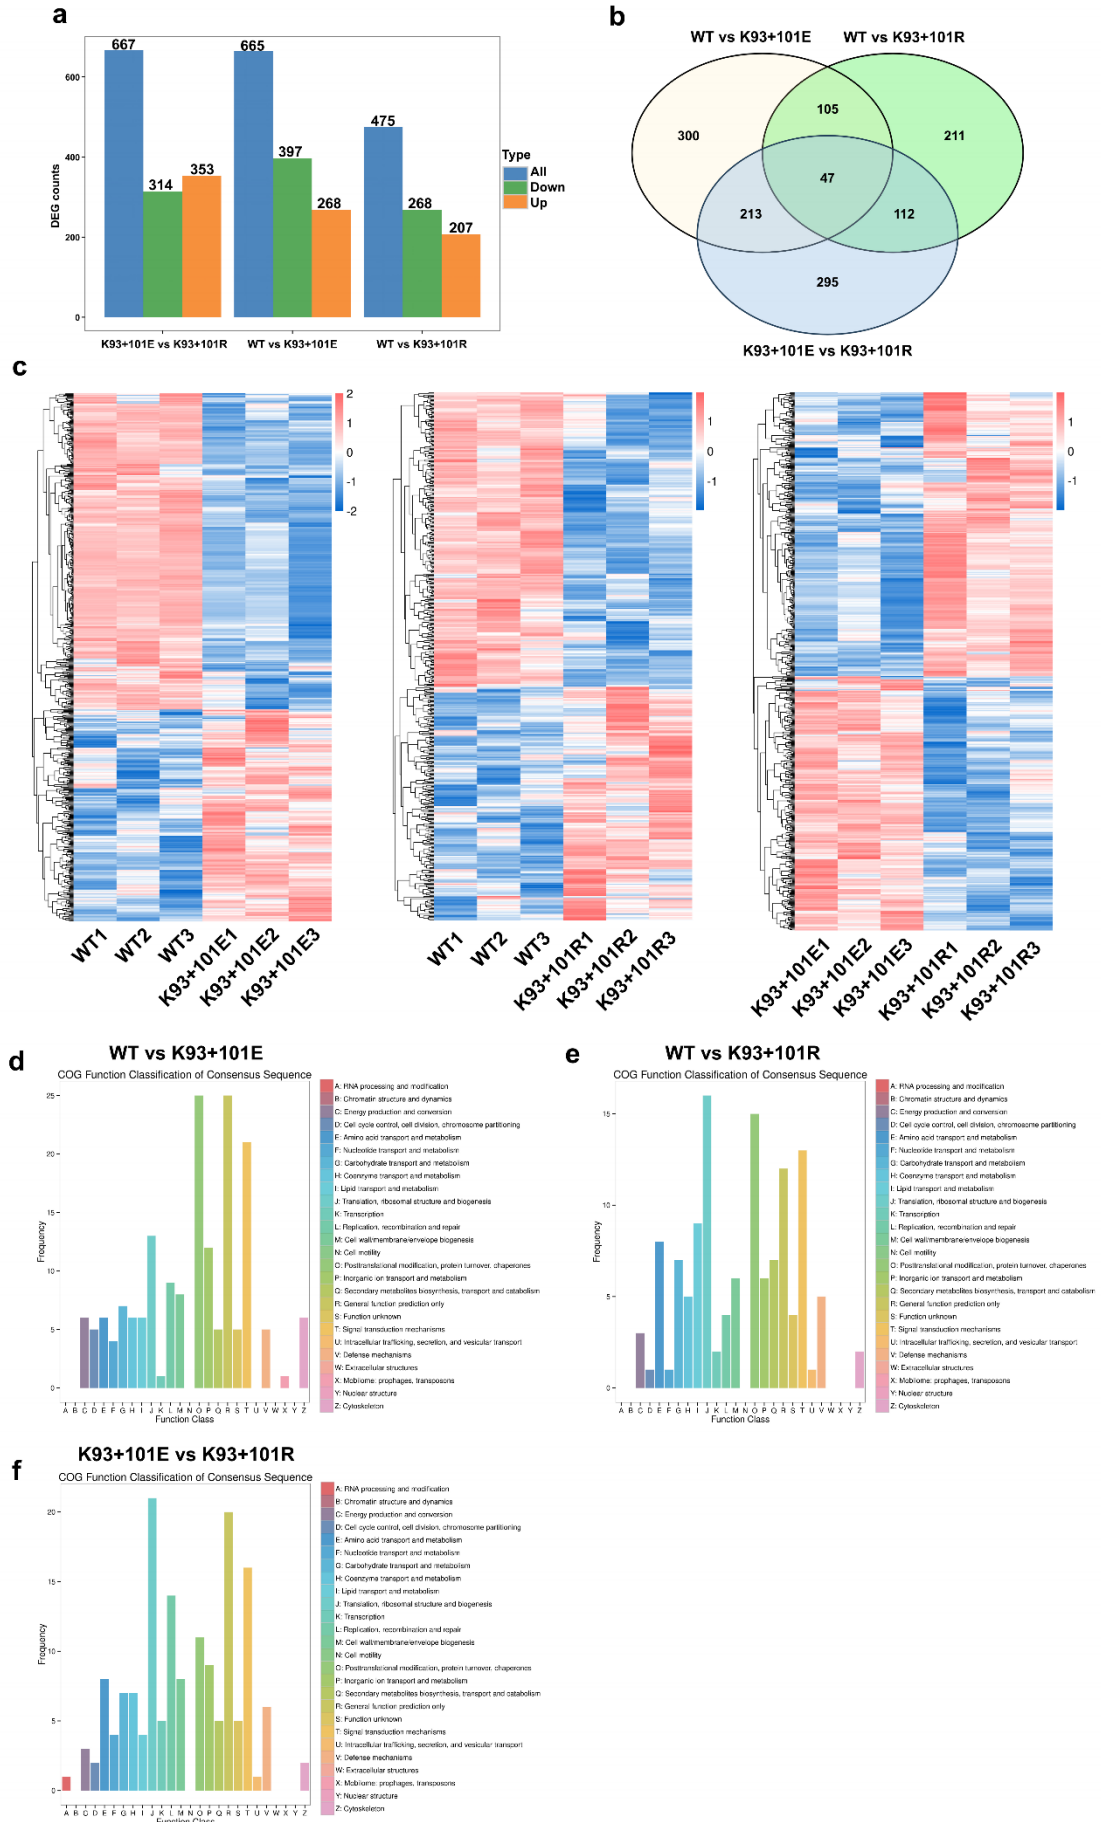

62 **Extended Data Fig. 8**|SUCLG2 succinylation affects gene expression in granulosa cells. **a**, Statistics of  
63 differentially expressed genes between each comparison group (n = 3 per group). **b**, The differential genes of  
64 different comparison combinations are displayed by Wayne diagram. The numbers in each region represent the  
65 number of genes under the corresponding classification, and the overlapping regions represent the number of  
66 differential genes shared among the related combinations in this region. **c**, Gene expression clustering heatmaps in  
67 different samples. **d-f**, Cluster of orthologous groups (COG) classification statistical analysis of differentially  
68 expressed genes between WT vs SUCLG2<sup>K93+101E</sup> mutant (**d**), WT vs SUCLG2<sup>K93+101R</sup> mutant (**e**) and  
69 SUCLG2<sup>K93+101E</sup> mutant vs SUCLG2<sup>K93+101R</sup> mutant (**f**).

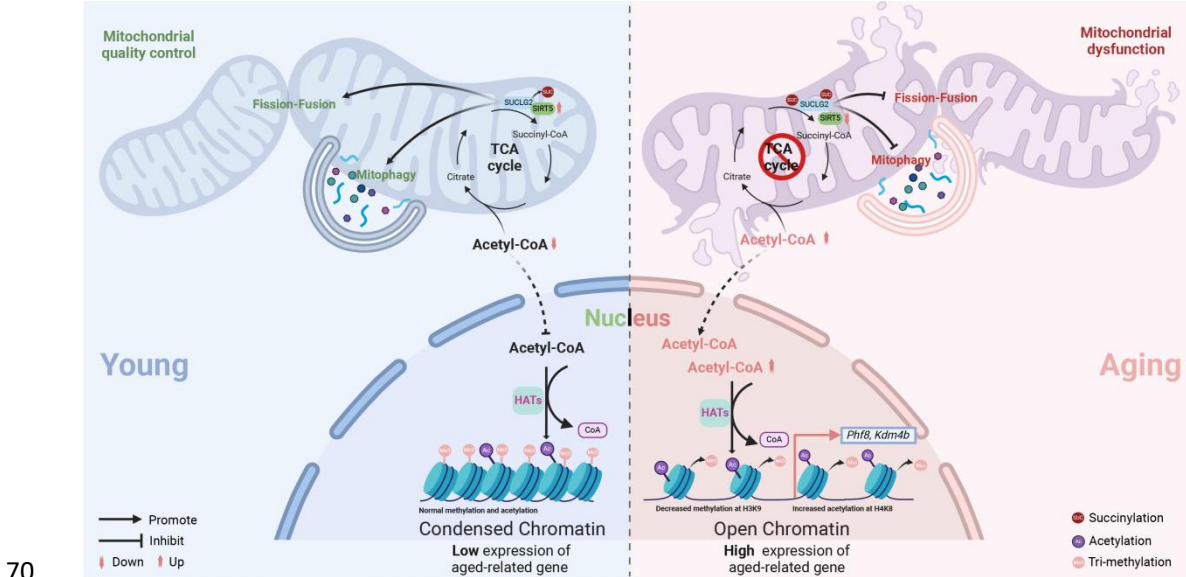

71 **Extended Data Fig. 9**|Mechanistic diagram of SIRT5-mediated SUCLG2 desuccinylation in ameliorating ovarian  
72 aging. SIRT5 catalyzes desuccinylation of SUCLG2 at K93 and K101 to maintain mitochondrial function and  
73 acetyl-CoA homeostasis. Defects in the SIRT5-SUCLG2 axis lead to nuclear acetyl-CoA accumulation, causing  
74 aberrant histone H4 hyperacetylation, mitochondrial dysfunction, and subsequent cellular senescence.
