# Supplementary material for: The SIRT5-SUCLG2 desuccinylation axis delays ovarian aging via a mitochondrial-epigenetic regulatory mechanism
Source: Research Square preprint supplement (doi:10.21203/rs.3.rs-7030863/v1), 2025-08-06
Supplement: Supplementary file 1 [file fe1e7a893bca181299958ffc.xlsx]

## Sheet: Supplementary Table 1
Supplementary Table 1. Overexpression of SIRT5 in granulosa cells resulted in up-regulation of 217 proteins and down-regulation of 198 proteins
Protein accession	Protein description	Gene name	SIRT5/Control Ratio	Regulated Type	MW [kDa]	Intensity Control	Intensity SIRT5	Control	SIRT5	Subcellular localization	KEGG KO No.	KEGG Gene	KEGG pathway	Biological Process	Cellular Component	Molecular Function	Pfam ID	Domain description	KOG category	KOG NO.	KOG description
A0A140T878	Signal transducer and activator of transcription OS=Bos taurus OX=9913 GN=STAT5B PE=3 SV=1	STAT5B	2.10809	Up	89.943	4144.66	8737.32	0.643482	1.35652	cytoplasm	K11224	STAT5B; signal transducer and activator of transcription 5B	map04012 ErbB signaling pathway; map04062 Chemokine signaling pathway; map04217 Necroptosis; map04630 JAK-STAT signaling pathway; map04658 Th1 and Th2 cell differentiation; map04659 Th17 cell differentiation; map04917 Prolactin signaling pathway; map04935 Growth hormone synthesis, secretion and action	GO:0000003 reproduction; GO:0000255 allantoin metabolic process; GO:0000902 cell morphogenesis; GO:0000904 cell morphogenesis involved in differentiation; GO:0001553 luteinization; GO:0001654 eye development; GO:0001666 response to hypoxia; GO:0001667 ameboidal-type cell migration; GO:0001672 regulation of chromatin assembly or disassembly; GO:0001709 cell fate determination; GO:0001775 cell acti…	GO:0005622 intracellular anatomical structure; GO:0005634 nucleus; GO:0005654 nucleoplasm; GO:0005737 cytoplasm; GO:0005829 cytosol; GO:0005886 plasma membrane; GO:0009898 cytoplasmic side of plasma membrane; GO:0016020 membrane; GO:0016324 apical plasma membrane; GO:0031974 membrane-enclosed lumen; GO:0031981 nuclear lumen; GO:0043226 organelle; GO:0043227 membrane-bounded organelle; GO:0043229 …	GO:0000976 transcription cis-regulatory region binding; GO:0000977 RNA polymerase II transcription regulatory region sequence-specific DNA binding; GO:0000978 RNA polymerase II cis-regulatory region sequence-specific DNA binding; GO:0000981 DNA-binding transcription factor activity, RNA polymerase II-specific; GO:0000987 cis-regulatory region sequence-specific DNA binding; GO:0001067 transcriptio…	PF02865; PF02864; PF00017	PF02865 STAT protein, protein interaction domain; PF02864 STAT protein, DNA binding domain; PF00017 SH2 domain	KT	KOG3667	STAT protein
A0A3Q1LX74	Gremlin 1, DAN family BMP antagonist OS=Bos taurus OX=9913 GN=GREM1 PE=3 SV=1	GREM1	1.71552	Up	26.5074	5198.62	8918.33	0.736507	1.26349	plasma membrane	K23318	GREM; gremlin	map04350 TGF-beta signaling pathway	GO:0000902 cell morphogenesis; GO:0001525 angiogenesis; GO:0001558 regulation of cell growth; GO:0001568 blood vessel development; GO:0001655 urogenital system development; GO:0001656 metanephros development; GO:0001657 ureteric bud development; GO:0001658 branching involved in ureteric bud morphogenesis; GO:0001667 ameboidal-type cell migration; GO:0001763 morphogenesis of a branching structure;…	GO:0005576 extracellular region; GO:0005615 extracellular space; GO:0009986 cell surface;	GO:0005102 signaling receptor binding; GO:0005126 cytokine receptor binding; GO:0005172 vascular endothelial growth factor receptor binding; GO:0005488 binding; GO:0005515 protein binding; GO:0008047 enzyme activator activity; GO:0016015 morphogen activity; GO:0019207 kinase regulator activity; GO:0019209 kinase activator activity; GO:0019887 protein kinase regulator activity; GO:0019955 cytokine…	PF03045	PF03045 DAN domain
A0A3Q1M2Z5	Transforming growth factor beta OS=Bos taurus OX=9913 GN=TGFB2 PE=3 SV=1	TGFB2	0.55057	Down	50.551	50500.4	27804	1.28985	0.710152	extracellular	K13376	TGFB2; transforming growth factor beta-2	map04010 MAPK signaling pathway; map04060 Cytokine-cytokine receptor interaction; map04068 FoxO signaling pathway; map04110 Cell cycle; map04218 Cellular senescence; map04350 TGF-beta signaling pathway; map04380 Osteoclast differentiation; map04390 Hippo signaling pathway	GO:0000003 reproduction; GO:0000902 cell morphogenesis; GO:0000904 cell morphogenesis involved in differentiation; GO:0001101 response to acid chemical; GO:0001501 skeletal system development; GO:0001502 cartilage condensation; GO:0001525 angiogenesis; GO:0001558 regulation of cell growth; GO:0001568 blood vessel development; GO:0001654 eye development; GO:0001655 urogenital system development; G…	GO:0005576 extracellular region; GO:0005604 basement membrane; GO:0005615 extracellular space; GO:0005622 intracellular anatomical structure; GO:0005737 cytoplasm; GO:0005768 endosome; GO:0005794 Golgi apparatus; GO:0005802 trans-Golgi network; GO:0009986 cell surface; GO:0012505 endomembrane system; GO:0030141 secretory granule; GO:0030424 axon; GO:0031012 extracellular matrix; GO:0031091 platel…	GO:0001540 amyloid-beta binding; GO:0005102 signaling receptor binding; GO:0005114 type II transforming growth factor beta receptor binding; GO:0005125 cytokine activity; GO:0005126 cytokine receptor binding; GO:0005160 transforming growth factor beta receptor binding; GO:0005488 binding; GO:0005515 protein binding; GO:0008083 growth factor activity; GO:0030545 signaling receptor regulator activi…	PF00019	PF00019 Transforming growth factor beta like domain	T	KOG3900	Transforming growth factor beta, bone morphogenetic protein and related proteins
A0A3Q1M4S3	Serine/threonine-protein phosphatase OS=Bos taurus OX=9913 GN=PPP3CA PE=3 SV=1	PPP3CA	1.56592	Up	59.2814	30382	47575.6	0.779449	1.22055	cytoplasm	K04348	PPP3C, CNA; serine/threonine-protein phosphatase 2B catalytic subunit [EC:3.1.3.16]	map04010 MAPK signaling pathway; map04020 Calcium signaling pathway; map04022 cGMP-PKG signaling pathway; map04114 Oocyte meiosis; map04218 Cellular senescence; map04310 Wnt signaling pathway; map04360 Axon guidance; map04370 VEGF signaling pathway; map04380 Osteoclast differentiation; map04625 C-type lectin receptor signaling pathway; map04650 Natural killer cell mediated cytotoxicity; map04658 …	GO:0000082 G1/S transition of mitotic cell cycle; GO:0000278 mitotic cell cycle; GO:0001678 cellular glucose homeostasis; GO:0001775 cell activation; GO:0001975 response to amphetamine; GO:0002376 immune system process; GO:0002682 regulation of immune system process; GO:0002764 immune response-regulating signaling pathway; GO:0002768 immune response-regulating cell surface receptor signaling path…	GO:0005622 intracellular anatomical structure; GO:0005634 nucleus; GO:0005654 nucleoplasm; GO:0005737 cytoplasm; GO:0005739 mitochondrion; GO:0005829 cytosol; GO:0005955 calcineurin complex; GO:0008287 protein serine/threonine phosphatase complex; GO:0016020 membrane; GO:0030016 myofibril; GO:0030017 sarcomere; GO:0030018 Z disc; GO:0030425 dendrite; GO:0031674 I band; GO:0031974 membrane-enclose…	GO:0003824 catalytic activity; GO:0004721 phosphoprotein phosphatase activity; GO:0004722 protein serine/threonine phosphatase activity; GO:0004723 calcium-dependent protein serine/threonine phosphatase activity; GO:0005488 binding; GO:0005509 calcium ion binding; GO:0005515 protein binding; GO:0005516 calmodulin binding; GO:0016018 cyclosporin A binding; GO:0016787 hydrolase activity; GO:0016788…	PF00149	PF00149 Calcineurin-like phosphoesterase	R	KOG0375	Serine-threonine phosphatase 2B, catalytic subunit
A2VDY3	Charged multivesicular body protein 4a OS=Bos taurus OX=9913 GN=CHMP4A PE=2 SV=1	CHMP4A	1.69459	Up	24.948	12580.8	21319.2	0.742228	1.25777	nucleus	K12194	CHMP4A_B, SNF7, VPS32A_B; charged multivesicular body protein 4A/B	map04144 Endocytosis; map04217 Necroptosis	GO:0000070 mitotic sister chromatid segregation; GO:0000278 mitotic cell cycle; GO:0000280 nuclear division; GO:0000819 sister chromatid segregation; GO:0000920 septum digestion after cytokinesis; GO:0006605 protein targeting; GO:0006612 protein targeting to membrane; GO:0006620 posttranslational protein targeting to endoplasmic reticulum membrane; GO:0006810 transport; GO:0006886 intracellular p…	GO:0000815 ESCRT III complex; GO:0005622 intracellular anatomical structure; GO:0005634 nucleus; GO:0005737 cytoplasm; GO:0005768 endosome; GO:0005829 cytosol; GO:0005886 plasma membrane; GO:0009898 cytoplasmic side of plasma membrane; GO:0010008 endosome membrane; GO:0012505 endomembrane system; GO:0016020 membrane; GO:0030117 membrane coat; GO:0030496 midbody; GO:0031090 organelle membrane; GO:…	GO:0005488 binding; GO:0005515 protein binding; GO:0019899 enzyme binding; GO:0042802 identical protein binding; GO:0042803 protein homodimerization activity; GO:0046983 protein dimerization activity; GO:0051117 ATPase binding;			U	KOG1656	Protein involved in glucose derepression and pre-vacuolar endosome protein sorting
A5PKM2	CDKN1A protein OS=Bos taurus OX=9913 GN=CDKN1A PE=2 SV=1	CDKN1A	1.54409	Up	17.9713	13817.7	21335.8	0.786135	1.21386	nucleus	K06625	CDKN1A, P21, CIP1; cyclin-dependent kinase inhibitor 1A	map04012 ErbB signaling pathway; map04066 HIF-1 signaling pathway; map04068 FoxO signaling pathway; map04110 Cell cycle; map04115 p53 signaling pathway; map04151 PI3K-Akt signaling pathway; map04218 Cellular senescence; map04630 JAK-STAT signaling pathway; map04921 Oxytocin signaling pathway; map04928 Parathyroid hormone synthesis, secretion and action	GO:0000075 cell cycle checkpoint signaling; GO:0000077 DNA damage checkpoint signaling; GO:0000079 regulation of cyclin-dependent protein serine/threonine kinase activity; GO:0000082 G1/S transition of mitotic cell cycle; GO:0000086 G2/M transition of mitotic cell cycle; GO:0000278 mitotic cell cycle; GO:0001558 regulation of cell growth; GO:0001932 regulation of protein phosphorylation; GO:00019…	GO:0000307 cyclin-dependent protein kinase holoenzyme complex; GO:0005622 intracellular anatomical structure; GO:0005634 nucleus; GO:0005654 nucleoplasm; GO:0005730 nucleolus; GO:0005737 cytoplasm; GO:0005829 cytosol; GO:0016604 nuclear body; GO:0031974 membrane-enclosed lumen; GO:0031981 nuclear lumen; GO:0032991 protein-containing complex; GO:0043226 organelle; GO:0043227 membrane-bounded organ…	GO:0003824 catalytic activity; GO:0004672 protein kinase activity; GO:0004674 protein serine/threonine kinase activity; GO:0004693 cyclin-dependent protein serine/threonine kinase activity; GO:0004857 enzyme inhibitor activity; GO:0004860 protein kinase inhibitor activity; GO:0004861 cyclin-dependent protein serine/threonine kinase inhibitor activity; GO:0005488 binding; GO:0005515 protein bindin…			T	KOG4743	Cyclin-dependent kinase inhibitor
A6QNQ7	Elongation of very long chain fatty acids protein 6 OS=Bos taurus OX=9913 GN=ELOVL6 PE=2 SV=1	ELOVL6	1.80393	Up	31.2817	19767.2	35658.6	0.713285	1.28671	plasma membrane	K10203	ELOVL6; elongation of very long chain fatty acids protein 6 [EC:2.3.1.199]	map00062 Fatty acid elongation; map01040 Biosynthesis of unsaturated fatty acids; map01100 Metabolic pathways; map01212 Fatty acid metabolism	GO:0000038 very long-chain fatty acid metabolic process; GO:0001676 long-chain fatty acid metabolic process; GO:0006082 organic acid metabolic process; GO:0006139 nucleobase-containing compound metabolic process; GO:0006163 purine nucleotide metabolic process; GO:0006164 purine nucleotide biosynthetic process; GO:0006629 lipid metabolic process; GO:0006631 fatty acid metabolic process; GO:0006633…	GO:0005622 intracellular anatomical structure; GO:0005737 cytoplasm; GO:0005783 endoplasmic reticulum; GO:0005789 endoplasmic reticulum membrane; GO:0012505 endomembrane system; GO:0016020 membrane; GO:0016021 integral component of membrane; GO:0030176 integral component of endoplasmic reticulum membrane; GO:0031224 intrinsic component of membrane; GO:0031227 intrinsic component of endoplasmic re…	GO:0003824 catalytic activity; GO:0004312 fatty acid synthase activity; GO:0009922 fatty acid elongase activity; GO:0016740 transferase activity; GO:0016746 acyltransferase activity; GO:0016747 acyltransferase activity, transferring groups other than amino-acyl groups;			I	KOG3072	Long chain fatty acid elongase
A6QQL0	Solute carrier family 15 member 4 OS=Bos taurus OX=9913 GN=SLC15A4 PE=2 SV=2	SLC15A4	0.561396	Down	61.3799	27702.3	15552	1.28091	0.719095	plasma membrane	K14638	SLC15A3_4, PHT; solute carrier family 15 (peptide/histidine transporter), member 3/4		GO:0001775 cell activation; GO:0002252 immune effector process; GO:0002263 cell activation involved in immune response; GO:0002274 myeloid leukocyte activation; GO:0002275 myeloid cell activation involved in immune response; GO:0002283 neutrophil activation involved in immune response; GO:0002366 leukocyte activation involved in immune response; GO:0002376 immune system process; GO:0002443 leukoc…	GO:0000323 lytic vacuole; GO:0005622 intracellular anatomical structure; GO:0005737 cytoplasm; GO:0005764 lysosome; GO:0005765 lysosomal membrane; GO:0005773 vacuole; GO:0005774 vacuolar membrane; GO:0005886 plasma membrane; GO:0012505 endomembrane system; GO:0012506 vesicle membrane; GO:0016020 membrane; GO:0030141 secretory granule; GO:0030659 cytoplasmic vesicle membrane; GO:0030667 secretory …	GO:0005215 transporter activity; GO:0005290 L-histidine transmembrane transporter activity; GO:0005342 organic acid transmembrane transporter activity; GO:0008324 cation transmembrane transporter activity; GO:0008509 anion transmembrane transporter activity; GO:0008514 organic anion transmembrane transporter activity; GO:0015075 ion transmembrane transporter activity; GO:0015078 proton transmembr…			E	KOG1237	H+/oligopeptide symporter
B2D1N9	Broad substrate specificity ATP-binding cassette transporter ABCG2 OS=Bos taurus OX=9913 GN=ABCG2 PE=2 SV=1	ABCG2	0.591279	Down	73.0974	71703	42396.5	1.25685	0.743149	plasma membrane	K05681	ABCG2, CD338; ATP-binding cassette, subfamily G (WHITE), member 2	map02010 ABC transporters; map04976 Bile secretion	GO:0000003 reproduction; GO:0001101 response to acid chemical; GO:0002237 response to molecule of bacterial origin; GO:0003008 system process; GO:0005975 carbohydrate metabolic process; GO:0006082 organic acid metabolic process; GO:0006725 cellular aromatic compound metabolic process; GO:0006807 nitrogen compound metabolic process; GO:0006810 transport; GO:0006811 ion transport; GO:0006820 anion …	GO:0005622 intracellular anatomical structure; GO:0005634 nucleus; GO:0005886 plasma membrane; GO:0016020 membrane; GO:0016021 integral component of membrane; GO:0016324 apical plasma membrane; GO:0031224 intrinsic component of membrane; GO:0032991 protein-containing complex; GO:0043226 organelle; GO:0043227 membrane-bounded organelle; GO:0043229 intracellular organelle; GO:0043231 intracellular …	GO:0000166 nucleotide binding; GO:0003824 catalytic activity; GO:0005215 transporter activity; GO:0005488 binding; GO:0005515 protein binding; GO:0005524 ATP binding; GO:0008092 cytoskeletal protein binding; GO:0008559 ABC-type xenobiotic transporter activity; GO:0015232 heme transmembrane transporter activity; GO:0015399 primary active transmembrane transporter activity; GO:0016462 pyrophosphata…	PF00005	PF00005 ABC transporter	Q	KOG0061	Transporter, ABC superfamily (Breast cancer resistance protein)
E1B8D6	histone acetyltransferase OS=Bos taurus OX=9913 GN=EP300 PE=4 SV=2	EP300	1.50784	Up	262.921	9218.08	13899.4	0.797499	1.2025	nucleus	K04498	EP300, CREBBP, KAT3; E1A/CREB-binding protein [EC:2.3.1.48]	map04024 cAMP signaling pathway; map04066 HIF-1 signaling pathway; map04068 FoxO signaling pathway; map04110 Cell cycle; map04310 Wnt signaling pathway; map04330 Notch signaling pathway; map04350 TGF-beta signaling pathway; map04520 Adherens junction; map04630 JAK-STAT signaling pathway; map04720 Long-term potentiation; map04916 Melanogenesis; map04919 Thyroid hormone signaling pathway; map04922 …	GO:0000003 reproduction; GO:0000075 cell cycle checkpoint signaling; GO:0000076 DNA replication checkpoint signaling; GO:0000077 DNA damage checkpoint signaling; GO:0000122 negative regulation of transcription by RNA polymerase II; GO:0000278 mitotic cell cycle; GO:0000902 cell morphogenesis; GO:0000904 cell morphogenesis involved in differentiation; GO:0001501 skeletal system development; GO:000…	GO:0000123 histone acetyltransferase complex; GO:0000785 chromatin; GO:0005622 intracellular anatomical structure; GO:0005634 nucleus; GO:0005654 nucleoplasm; GO:0005667 transcription regulator complex; GO:0005694 chromosome; GO:0005700 polytene chromosome; GO:0005737 cytoplasm; GO:0005829 cytosol; GO:0031248 protein acetyltransferase complex; GO:0031974 membrane-enclosed lumen; GO:0031981 nuclea…	GO:0000976 transcription cis-regulatory region binding; GO:0000977 RNA polymerase II transcription regulatory region sequence-specific DNA binding; GO:0000978 RNA polymerase II cis-regulatory region sequence-specific DNA binding; GO:0000981 DNA-binding transcription factor activity, RNA polymerase II-specific; GO:0000987 cis-regulatory region sequence-specific DNA binding; GO:0001067 transcriptio…	PF02172; PF00439; PF06001; PF08214; PF00569; PF09030	PF02172 KIX domain; PF00439 Bromodomain; PF06001 CREB-binding protein/p300, atypical RING domain; PF08214 Histone acetylation protein; PF00569 Zinc finger, ZZ type; PF09030 Creb binding	K	KOG1778	CREB binding protein/P300 and related TAZ Zn-finger proteins
E1BER5	receptor protein-tyrosine kinase OS=Bos taurus OX=9913 GN=EPHA4 PE=4 SV=3	EPHA4	0.567425	Down	109.827	31792.3	18039.8	1.27598	0.724022	plasma membrane	K05105	EPHA4, SEK, TYRO1; Eph receptor A4 [EC:2.7.10.1]	map04360 Axon guidance	GO:0000003 reproduction; GO:0000902 cell morphogenesis; GO:0000904 cell morphogenesis involved in differentiation; GO:0001556 oocyte maturation; GO:0001558 regulation of cell growth; GO:0001654 eye development; GO:0001655 urogenital system development; GO:0001756 somitogenesis; GO:0001822 kidney development; GO:0001932 regulation of protein phosphorylation; GO:0001934 positive regulation of prote…	GO:0005622 intracellular anatomical structure; GO:0005737 cytoplasm; GO:0005739 mitochondrion; GO:0005740 mitochondrial envelope; GO:0005741 mitochondrial outer membrane; GO:0005768 endosome; GO:0005769 early endosome; GO:0005783 endoplasmic reticulum; GO:0005794 Golgi apparatus; GO:0005886 plasma membrane; GO:0005887 integral component of plasma membrane; GO:0009986 cell surface; GO:0010008 endo…	GO:0003824 catalytic activity; GO:0004672 protein kinase activity; GO:0004713 protein tyrosine kinase activity; GO:0004714 transmembrane receptor protein tyrosine kinase activity; GO:0004888 transmembrane signaling receptor activity; GO:0005003 ephrin receptor activity; GO:0005004 GPI-linked ephrin receptor activity; GO:0005005 transmembrane-ephrin receptor activity; GO:0005102 signaling receptor…	PF01404; PF00041; PF14575; PF07714; PF07647	PF01404 Ephrin receptor ligand binding domain; PF00041 Fibronectin type III domain; PF14575 Ephrin type-A receptor 2 transmembrane domain; PF07714 Protein tyrosine and serine/threonine kinase; PF07647 SAM domain (Sterile alpha motif)	T	KOG0196	Tyrosine kinase, EPH (ephrin) receptor family
F1MGU0	Death domain-associated protein 6 OS=Bos taurus OX=9913 GN=DAXX PE=3 SV=1	DAXX	1.73627	Up	82.9561	9891.34	17174	0.730923	1.26908	nucleus	K02308	DAXX; death-associated protein 6	map04010 MAPK signaling pathway; map04210 Apoptosis	GO:0000122 negative regulation of transcription by RNA polymerase II; GO:0000165 MAPK cascade; GO:0000278 mitotic cell cycle; GO:0000281 mitotic cytokinesis; GO:0000910 cytokinesis; GO:0001932 regulation of protein phosphorylation; GO:0001934 positive regulation of protein phosphorylation; GO:0006323 DNA packaging; GO:0006325 chromatin organization; GO:0006333 chromatin assembly or disassembly; G…	GO:0000775 chromosome, centromeric region; GO:0000785 chromatin; GO:0000792 heterochromatin; GO:0000803 sex chromosome; GO:0001741 XY body; GO:0005622 intracellular anatomical structure; GO:0005634 nucleus; GO:0005654 nucleoplasm; GO:0005694 chromosome; GO:0005737 cytoplasm; GO:0005829 cytosol; GO:0005856 cytoskeleton; GO:0005874 microtubule; GO:0005938 cell cortex; GO:0015630 microtubule cytoske…	GO:0002039 p53 binding; GO:0003712 transcription coregulator activity; GO:0003713 transcription coactivator activity; GO:0003714 transcription corepressor activity; GO:0005102 signaling receptor binding; GO:0005488 binding; GO:0005515 protein binding; GO:0008047 enzyme activator activity; GO:0008092 cytoskeletal protein binding; GO:0008134 transcription factor binding; GO:0008432 JUN kinase bindi…	PF03344	PF03344 Daxx N-terminal Rassf1C-interacting domain
F1MQV7	5'-AMP-activated protein kinase catalytic subunit alpha-2 OS=Bos taurus OX=9913 GN=PRKAA2 PE=3 SV=2	PRKAA2	0.62621	Down	62.3207	22636.8	14175.4	1.22985	0.770146	cytoplasm	K07198	PRKAA, AMPK; 5'-AMP-activated protein kinase, catalytic alpha subunit [EC:2.7.11.11]	map04068 FoxO signaling pathway; map04140 Autophagy - animal; map04150 mTOR signaling pathway; map04151 PI3K-Akt signaling pathway; map04152 AMPK signaling pathway; map04211 Longevity regulating pathway; map04213 Longevity regulating pathway - multiple species; map04361 Axon regeneration; map04371 Apelin signaling pathway; map04530 Tight junction; map04710 Circadian rhythm; map04714 Thermogenesis…	GO:0000003 reproduction; GO:0000278 mitotic cell cycle; GO:0000902 cell morphogenesis; GO:0000904 cell morphogenesis involved in differentiation; GO:0001101 response to acid chemical; GO:0001558 regulation of cell growth; GO:0001678 cellular glucose homeostasis; GO:0002791 regulation of peptide secretion; GO:0002792 negative regulation of peptide secretion; GO:0002793 positive regulation of pepti…	GO:0005622 intracellular anatomical structure; GO:0005634 nucleus; GO:0005654 nucleoplasm; GO:0005737 cytoplasm; GO:0005768 endosome; GO:0005794 Golgi apparatus; GO:0005829 cytosol; GO:0005886 plasma membrane; GO:0010494 cytoplasmic stress granule; GO:0012505 endomembrane system; GO:0016020 membrane; GO:0016324 apical plasma membrane; GO:0016604 nuclear body; GO:0016607 nuclear speck; GO:0030424 …	GO:0000166 nucleotide binding; GO:0003682 chromatin binding; GO:0003824 catalytic activity; GO:0004672 protein kinase activity; GO:0004674 protein serine/threonine kinase activity; GO:0004679 AMP-activated protein kinase activity; GO:0004703 G protein-coupled receptor kinase activity; GO:0004712 protein serine/threonine/tyrosine kinase activity; GO:0005488 binding; GO:0005515 protein binding; GO:…	PF00069; PF16579	PF00069 Protein kinase domain; PF16579 Adenylate sensor of SNF1-like protein kinase	T	KOG0583	Serine/threonine protein kinase
G3MYE7	Methyl-CpG-binding protein 2 OS=Bos taurus OX=9913 GN=MECP2 PE=4 SV=2	MECP2	0.642789	Down	53.2625	6762.99	4347.18	1.21744	0.782559	nucleus	K11588	MECP2; methyl CpG binding protein 2		GO:0000122 negative regulation of transcription by RNA polymerase II; GO:0000226 microtubule cytoskeleton organization; GO:0000278 mitotic cell cycle; GO:0001558 regulation of cell growth; GO:0001662 behavioral fear response; GO:0001666 response to hypoxia; GO:0001964 startle response; GO:0001976 nervous system process involved in regulation of systemic arterial blood pressure; GO:0002087 regulat…	GO:0000228 nuclear chromosome; GO:0000785 chromatin; GO:0000792 heterochromatin; GO:0005622 intracellular anatomical structure; GO:0005634 nucleus; GO:0005694 chromosome; GO:0005737 cytoplasm; GO:0005829 cytosol; GO:0031974 membrane-enclosed lumen; GO:0031981 nuclear lumen; GO:0032991 protein-containing complex; GO:0043226 organelle; GO:0043227 membrane-bounded organelle; GO:0043228 non-membrane-…	GO:0000166 nucleotide binding; GO:0000217 DNA secondary structure binding; GO:0000400 four-way junction DNA binding; GO:0000981 DNA-binding transcription factor activity, RNA polymerase II-specific; GO:0001227 DNA-binding transcription repressor activity, RNA polymerase II-specific; GO:0003676 nucleic acid binding; GO:0003677 DNA binding; GO:0003682 chromatin binding; GO:0003690 double-stranded D…	PF01429	PF01429 Methyl-CpG binding domain	KB	KOG4161	Methyl-CpG binding transcription regulators
P03910	NADH-ubiquinone oxidoreductase chain 4 OS=Bos taurus OX=9913 GN=MT-ND4 PE=1 SV=1	MT-ND4	0.657372	Down	52.0991	54866.4	36067.7	1.20673	0.79327	plasma membrane	K03881	ND4; NADH-ubiquinone oxidoreductase chain 4 [EC:7.1.1.2]	map00190 Oxidative phosphorylation; map01100 Metabolic pathways; map04714 Thermogenesis; map04723 Retrograde endocannabinoid signaling	GO:0001666 response to hypoxia; GO:0001701 in utero embryonic development; GO:0006091 generation of precursor metabolites and energy; GO:0006119 oxidative phosphorylation; GO:0006120 mitochondrial electron transport, NADH to ubiquinone; GO:0006139 nucleobase-containing compound metabolic process; GO:0006163 purine nucleotide metabolic process; GO:0006725 cellular aromatic compound metabolic proce…	GO:0005622 intracellular anatomical structure; GO:0005737 cytoplasm; GO:0005739 mitochondrion; GO:0005740 mitochondrial envelope; GO:0005743 mitochondrial inner membrane; GO:0005746 mitochondrial respirasome; GO:0005747 mitochondrial respiratory chain complex I; GO:0016020 membrane; GO:0019866 organelle inner membrane; GO:0030964 NADH dehydrogenase complex; GO:0031090 organelle membrane; GO:00319…	GO:0003824 catalytic activity; GO:0003954 NADH dehydrogenase activity; GO:0008137 NADH dehydrogenase (ubiquinone) activity; GO:0016491 oxidoreductase activity; GO:0016651 oxidoreductase activity, acting on NAD(P)H; GO:0016655 oxidoreductase activity, acting on NAD(P)H, quinone or similar compound as acceptor; GO:0050136 NADH dehydrogenase (quinone) activity;			C	KOG4845	NADH dehydrogenase, subunit 4
P10790	Fatty acid-binding protein, heart OS=Bos taurus OX=9913 GN=FABP3 PE=1 SV=2	FABP3	1.65429	Up	14.7789	72361.6	119707	0.753498	1.2465	cytoplasm	K08752	FABP3; fatty acid-binding protein 3, muscle and heart	map03320 PPAR signaling pathway	GO:0001101 response to acid chemical; GO:0006082 organic acid metabolic process; GO:0006629 lipid metabolic process; GO:0006631 fatty acid metabolic process; GO:0006635 fatty acid beta-oxidation; GO:0006638 neutral lipid metabolic process; GO:0006639 acylglycerol metabolic process; GO:0006641 triglyceride metabolic process; GO:0006810 transport; GO:0006811 ion transport; GO:0006820 anion transpor…	GO:0005576 extracellular region; GO:0005615 extracellular space; GO:0005622 intracellular anatomical structure; GO:0005737 cytoplasm; GO:0005739 mitochondrion; GO:0005759 mitochondrial matrix; GO:0005829 cytosol; GO:0016528 sarcoplasm; GO:0031974 membrane-enclosed lumen; GO:0043226 organelle; GO:0043227 membrane-bounded organelle; GO:0043229 intracellular organelle; GO:0043231 intracellular membr…	GO:0005215 transporter activity; GO:0005319 lipid transporter activity; GO:0005324 long-chain fatty acid transporter activity; GO:0005488 binding; GO:0005504 fatty acid binding; GO:0005515 protein binding; GO:0008092 cytoskeletal protein binding; GO:0008289 lipid binding; GO:0031406 carboxylic acid binding; GO:0033293 monocarboxylic acid binding; GO:0036041 long-chain fatty acid binding; GO:00360…	PF00061	PF00061 Lipocalin / cytosolic fatty-acid binding protein family	I	KOG4015	Fatty acid-binding protein FABP
P56966	Geranylgeranyl pyrophosphate synthase OS=Bos taurus OX=9913 GN=GGPS1 PE=1 SV=2	GGPS1	0.651613	Down	34.8999	17820.8	11612.3	1.21094	0.789063	cytoplasm	K00804	GGPS1; geranylgeranyl diphosphate synthase, type III [EC:2.5.1.1 2.5.1.10 2.5.1.29]	map00900 Terpenoid backbone biosynthesis; map01100 Metabolic pathways	GO:0000003 reproduction; GO:0003006 developmental process involved in reproduction; GO:0006066 alcohol metabolic process; GO:0006629 lipid metabolic process; GO:0006694 steroid biosynthetic process; GO:0006695 cholesterol biosynthetic process; GO:0006720 isoprenoid metabolic process; GO:0006928 movement of cell or subcellular component; GO:0007275 multicellular organism development; GO:0007276 ga…	GO:0005622 intracellular anatomical structure; GO:0005737 cytoplasm; GO:0005829 cytosol;	GO:0003824 catalytic activity; GO:0004161 dimethylallyltranstransferase activity; GO:0004311 farnesyltranstransferase activity; GO:0004337 geranyltranstransferase activity; GO:0004659 prenyltransferase activity; GO:0005488 binding; GO:0005515 protein binding; GO:0016740 transferase activity; GO:0016765 transferase activity, transferring alkyl or aryl (other than methyl) groups; GO:0042802 identic…	PF00348	PF00348 Polyprenyl synthetase	H	KOG0777	Geranylgeranyl pyrophosphate synthase/Polyprenyl synthetase
P68138	Actin, alpha skeletal muscle OS=Bos taurus OX=9913 GN=ACTA1 PE=1 SV=1	ACTA1	0.548339	Down	42.051	169025	92683.2	1.29171	0.708293	cytoskeleton	K10354	ACTA1; actin, alpha skeletal muscle		GO:0003008 system process; GO:0003012 muscle system process; GO:0006928 movement of cell or subcellular component; GO:0006936 muscle contraction; GO:0006996 organelle organization; GO:0007010 cytoskeleton organization; GO:0007015 actin filament organization; GO:0007275 multicellular organism development; GO:0007517 muscle organ development; GO:0007519 skeletal muscle tissue development; GO:000960…	GO:0001725 stress fiber; GO:0005622 intracellular anatomical structure; GO:0005737 cytoplasm; GO:0005829 cytosol; GO:0005856 cytoskeleton; GO:0005865 striated muscle thin filament; GO:0005884 actin filament; GO:0015629 actin cytoskeleton; GO:0030016 myofibril; GO:0030017 sarcomere; GO:0030027 lamellipodium; GO:0030175 filopodium; GO:0031252 cell leading edge; GO:0032432 actin filament bundle; GO:…	GO:0000166 nucleotide binding; GO:0005198 structural molecule activity; GO:0005200 structural constituent of cytoskeleton; GO:0005488 binding; GO:0005515 protein binding; GO:0005524 ATP binding; GO:0008092 cytoskeletal protein binding; GO:0017022 myosin binding; GO:0017076 purine nucleotide binding; GO:0030554 adenyl nucleotide binding; GO:0032553 ribonucleotide binding; GO:0032555 purine ribonuc…			Z	KOG0676	Actin and related proteins
P79345	NPC intracellular cholesterol transporter 2 OS=Bos taurus OX=9913 GN=NPC2 PE=1 SV=1	NPC2	1.59239	Up	16.6403	20362.8	32425.6	0.771488	1.22851	extracellular	K13443	NPC2; Niemann-Pick C2 protein	map04142 Lysosome; map04979 Cholesterol metabolism	GO:0001775 cell activation; GO:0002165 instar larval or pupal development; GO:0002252 immune effector process; GO:0002263 cell activation involved in immune response; GO:0002274 myeloid leukocyte activation; GO:0002275 myeloid cell activation involved in immune response; GO:0002283 neutrophil activation involved in immune response; GO:0002366 leukocyte activation involved in immune response; GO:0…	GO:0000323 lytic vacuole; GO:0005576 extracellular region; GO:0005615 extracellular space; GO:0005622 intracellular anatomical structure; GO:0005737 cytoplasm; GO:0005764 lysosome; GO:0005766 primary lysosome; GO:0005773 vacuole; GO:0005775 vacuolar lumen; GO:0012505 endomembrane system; GO:0030141 secretory granule; GO:0031410 cytoplasmic vesicle; GO:0031974 membrane-enclosed lumen; GO:0031982 v…	GO:0001530 lipopolysaccharide binding; GO:0003823 antigen binding; GO:0005215 transporter activity; GO:0005319 lipid transporter activity; GO:0005488 binding; GO:0005496 steroid binding; GO:0005515 protein binding; GO:0005539 glycosaminoglycan binding; GO:0008289 lipid binding; GO:0015248 sterol transporter activity; GO:0015485 cholesterol binding; GO:0019899 enzyme binding; GO:0030882 lipid anti…	PF02221	PF02221 ML domain	S	KOG4063	Major epididymal secretory protein HE1
Q17QE5	Calcium and integrin-binding protein 1 OS=Bos taurus OX=9913 GN=CIB1 PE=2 SV=1	CIB1	0.596466	Down	21.7283	18115.2	10805.1	1.25277	0.747233	cytoplasm,nucleus	K17259	CIB1; calcium and integrin-binding protein 1		GO:0000003 reproduction; GO:0000226 microtubule cytoskeleton organization; GO:0000278 mitotic cell cycle; GO:0000902 cell morphogenesis; GO:0000904 cell morphogenesis involved in differentiation; GO:0001558 regulation of cell growth; GO:0001932 regulation of protein phosphorylation; GO:0001933 negative regulation of protein phosphorylation; GO:0001934 positive regulation of protein phosphorylatio…	GO:0001726 ruffle; GO:0005622 intracellular anatomical structure; GO:0005634 nucleus; GO:0005654 nucleoplasm; GO:0005737 cytoplasm; GO:0005783 endoplasmic reticulum; GO:0005813 centrosome; GO:0005815 microtubule organizing center; GO:0005856 cytoskeleton; GO:0005886 plasma membrane; GO:0012505 endomembrane system; GO:0015630 microtubule cytoskeleton; GO:0016020 membrane; GO:0016324 apical plasma …	GO:0004857 enzyme inhibitor activity; GO:0004860 protein kinase inhibitor activity; GO:0005488 binding; GO:0005509 calcium ion binding; GO:0005515 protein binding; GO:0008022 protein C-terminus binding; GO:0008427 calcium-dependent protein kinase inhibitor activity; GO:0010858 calcium-dependent protein kinase regulator activity; GO:0019207 kinase regulator activity; GO:0019210 kinase inhibitor ac…	PF13499	PF13499 EF-hand domain pair	T	KOG0034	Ca2+/calmodulin-dependent protein phosphatase (calcineurin subunit B), EF-Hand superfamily protein
Q1JQA7	Fructose-2,6-bisphosphatase TIGAR OS=Bos taurus OX=9913 GN=TIGAR PE=2 SV=1	TIGAR	1.57203	Up	29.4667	10077.4	15842	0.777595	1.22241	extracellular	K14634	TIGAR; fructose-2,6-bisphosphatase [EC:3.1.3.46]	map00051 Fructose and mannose metabolism; map01100 Metabolic pathways	GO:0001666 response to hypoxia; GO:0002064 epithelial cell development; GO:0002065 columnar/cuboidal epithelial cell differentiation; GO:0002066 columnar/cuboidal epithelial cell development; GO:0002831 regulation of response to biotic stimulus; GO:0002931 response to ischemia; GO:0006003 fructose 2,6-bisphosphate metabolic process; GO:0006109 regulation of carbohydrate metabolic process; GO:0006…	GO:0005622 intracellular anatomical structure; GO:0005634 nucleus; GO:0005737 cytoplasm; GO:0005739 mitochondrion; GO:0005740 mitochondrial envelope; GO:0005741 mitochondrial outer membrane; GO:0005829 cytosol; GO:0016020 membrane; GO:0019867 outer membrane; GO:0031090 organelle membrane; GO:0031966 mitochondrial membrane; GO:0031967 organelle envelope; GO:0031968 organelle outer membrane; GO:003…	GO:0003824 catalytic activity; GO:0004083 bisphosphoglycerate 2-phosphatase activity; GO:0004331 fructose-2,6-bisphosphate 2-phosphatase activity; GO:0016787 hydrolase activity; GO:0016788 hydrolase activity, acting on ester bonds; GO:0016791 phosphatase activity; GO:0019203 carbohydrate phosphatase activity; GO:0034416 bisphosphoglycerate phosphatase activity; GO:0042578 phosphoric ester hydrola…	PF00300	PF00300 Histidine phosphatase superfamily (branch 1)	G	KOG0235	Phosphoglycerate mutase
Q1RMT7	Serine/threonine-protein kinase RIO3 OS=Bos taurus OX=9913 GN=RIOK3 PE=2 SV=1	RIOK3	0.437689	Down	58.9278	15521.8	6793.72	1.39112	0.608879	cytoplasm	K08872	RIOK3, SUDD; RIO kinase 3 [EC:2.7.11.1]		GO:0001817 regulation of cytokine production; GO:0001819 positive regulation of cytokine production; GO:0002682 regulation of immune system process; GO:0002683 negative regulation of immune system process; GO:0002684 positive regulation of immune system process; GO:0002697 regulation of immune effector process; GO:0002698 negative regulation of immune effector process; GO:0002831 regulation of re…	GO:0005622 intracellular anatomical structure; GO:0005634 nucleus; GO:0005737 cytoplasm; GO:0005829 cytosol; GO:0030684 preribosome; GO:0030688 preribosome, small subunit precursor; GO:0032991 protein-containing complex; GO:0043226 organelle; GO:0043227 membrane-bounded organelle; GO:0043229 intracellular organelle; GO:0043231 intracellular membrane-bounded organelle; GO:1990904 ribonucleoprotein…	GO:0002020 protease binding; GO:0003824 catalytic activity; GO:0004672 protein kinase activity; GO:0004674 protein serine/threonine kinase activity; GO:0005488 binding; GO:0005515 protein binding; GO:0016301 kinase activity; GO:0016740 transferase activity; GO:0016772 transferase activity, transferring phosphorus-containing groups; GO:0016773 phosphotransferase activity, alcohol group as acceptor…			T	KOG2269	Serine/threonine protein kinase
Q28178	Thrombospondin-1 OS=Bos taurus OX=9913 GN=THBS1 PE=2 SV=2	THBS1	0.619482	Down	129.534	27108	16792.9	1.23496	0.765037	extracellular	K16857	THBS1; thrombospondin 1	map04015 Rap1 signaling pathway; map04115 p53 signaling pathway; map04145 Phagosome; map04151 PI3K-Akt signaling pathway; map04350 TGF-beta signaling pathway; map04510 Focal adhesion; map04512 ECM-receptor interaction	GO:0000302 response to reactive oxygen species; GO:0001501 skeletal system development; GO:0001525 angiogenesis; GO:0001568 blood vessel development; GO:0001666 response to hypoxia; GO:0001817 regulation of cytokine production; GO:0001818 negative regulation of cytokine production; GO:0001819 positive regulation of cytokine production; GO:0001932 regulation of protein phosphorylation; GO:0001934 …	GO:0005576 extracellular region; GO:0005577 fibrinogen complex; GO:0005615 extracellular space; GO:0005622 intracellular anatomical structure; GO:0005737 cytoplasm; GO:0005783 endoplasmic reticulum; GO:0005788 endoplasmic reticulum lumen; GO:0005886 plasma membrane; GO:0009897 external side of plasma membrane; GO:0009986 cell surface; GO:0012505 endomembrane system; GO:0016020 membrane; GO:001652…	GO:0001786 phosphatidylserine binding; GO:0001968 fibronectin binding; GO:0005102 signaling receptor binding; GO:0005178 integrin binding; GO:0005488 binding; GO:0005509 calcium ion binding; GO:0005515 protein binding; GO:0005518 collagen binding; GO:0005539 glycosaminoglycan binding; GO:0005543 phospholipid binding; GO:0008201 heparin binding; GO:0008289 lipid binding; GO:0017134 fibroblast grow…	PF00093; PF00090; PF12662; PF02412	PF00093 von Willebrand factor type C domain; PF00090 Thrombospondin type 1 domain; PF12662 Complement Clr-like EGF-like; PF02412 Thrombospondin type 3 repeat
Q2HJA5	Dysbindin OS=Bos taurus OX=9913 GN=DTNBP1 PE=2 SV=1	DTNBP1	0.654105	Down	38.2075	17723.1	11592.8	1.20911	0.790887	nucleus	K20189	DTNBP1, BLOC1S8; dysbindin		GO:0000003 reproduction; GO:0000902 cell morphogenesis; GO:0000904 cell morphogenesis involved in differentiation; GO:0001505 regulation of neurotransmitter levels; GO:0001654 eye development; GO:0001932 regulation of protein phosphorylation; GO:0001933 negative regulation of protein phosphorylation; GO:0001934 positive regulation of protein phosphorylation; GO:0001956 positive regulation of neur…	GO:0005622 intracellular anatomical structure; GO:0005634 nucleus; GO:0005737 cytoplasm; GO:0005783 endoplasmic reticulum; GO:0005789 endoplasmic reticulum membrane; GO:0005829 cytosol; GO:0005856 cytoskeleton; GO:0005886 plasma membrane; GO:0008021 synaptic vesicle; GO:0012505 endomembrane system; GO:0012506 vesicle membrane; GO:0014069 postsynaptic density; GO:0015630 microtubule cytoskeleton; …	GO:0005488 binding; GO:0005515 protein binding;
Q2KJG4	Microsomal glutathione S-transferase 2 OS=Bos taurus OX=9913 GN=MGST2 PE=2 SV=1	MGST2	1.54935	Up	16.4833	13598.4	21068.7	0.784513	1.21549	extracellular	K00799	GST, gst; glutathione S-transferase [EC:2.5.1.18]	map00480 Glutathione metabolism; map00980 Metabolism of xenobiotics by cytochrome P450; map00982 Drug metabolism - cytochrome P450; map00983 Drug metabolism - other enzymes; map01100 Metabolic pathways; map04212 Longevity regulating pathway - worm	GO:0006082 organic acid metabolic process; GO:0006518 peptide metabolic process; GO:0006575 cellular modified amino acid metabolic process; GO:0006629 lipid metabolic process; GO:0006643 membrane lipid metabolic process; GO:0006690 icosanoid metabolic process; GO:0006691 leukotriene metabolic process; GO:0006749 glutathione metabolic process; GO:0006750 glutathione biosynthetic process; GO:000679…	GO:0005622 intracellular anatomical structure; GO:0005634 nucleus; GO:0005635 nuclear envelope; GO:0005737 cytoplasm; GO:0005783 endoplasmic reticulum; GO:0005789 endoplasmic reticulum membrane; GO:0005886 plasma membrane; GO:0012505 endomembrane system; GO:0016020 membrane; GO:0031967 organelle envelope; GO:0031975 envelope; GO:0031984 organelle subcompartment; GO:0042175 nuclear outer membrane-…	GO:0003824 catalytic activity; GO:0004364 glutathione transferase activity; GO:0004464 leukotriene-C4 synthase activity; GO:0004601 peroxidase activity; GO:0004602 glutathione peroxidase activity; GO:0016209 antioxidant activity; GO:0016491 oxidoreductase activity; GO:0016684 oxidoreductase activity, acting on peroxide as acceptor; GO:0016740 transferase activity; GO:0016765 transferase activity,…
Q3SX29	Secreted frizzled-related protein 2 OS=Bos taurus OX=9913 GN=SFRP2 PE=2 SV=1	SFRP2	1.8834	Up	33.3069	40916.3	77061.5	0.693627	1.30637	extracellular	K02176	SFRP2; secreted frizzled-related protein 2	map04310 Wnt signaling pathway	GO:0000003 reproduction; GO:0001501 skeletal system development; GO:0001525 angiogenesis; GO:0001558 regulation of cell growth; GO:0001568 blood vessel development; GO:0001569 branching involved in blood vessel morphogenesis; GO:0001756 somitogenesis; GO:0001763 morphogenesis of a branching structure; GO:0001838 embryonic epithelial tube formation; GO:0001841 neural tube formation; GO:0001843 neu…	GO:0005576 extracellular region; GO:0005615 extracellular space; GO:0016020 membrane; GO:0016021 integral component of membrane; GO:0031012 extracellular matrix; GO:0031224 intrinsic component of membrane; GO:0062023 collagen-containing extracellular matrix;	GO:0001968 fibronectin binding; GO:0004888 transmembrane signaling receptor activity; GO:0004930 G protein-coupled receptor activity; GO:0005102 signaling receptor binding; GO:0005178 integrin binding; GO:0005488 binding; GO:0005515 protein binding; GO:0008047 enzyme activator activity; GO:0016504 peptidase activator activity; GO:0017147 Wnt-protein binding; GO:0030234 enzyme regulator activity; …	PF01392; PF01759	PF01392 Fz domain; PF01759 UNC-6/NTR/C345C module	T	KOG3577	Smoothened and related G-protein-coupled receptors
Q3ZBJ1	Nuclear cap-binding protein subunit 2 OS=Bos taurus OX=9913 GN=NCBP2 PE=2 SV=1	NCBP2	0.645952	Down	18.0011	17853.4	11532.5	1.2151	0.784898	cytoplasm	K12883	NCBP2, CBP20; nuclear cap-binding protein subunit 2	map03013 Nucleocytoplasmic transport; map03015 mRNA surveillance pathway; map03040 Spliceosome	GO:0000184 nuclear-transcribed mRNA catabolic process, nonsense-mediated decay; GO:0000375 RNA splicing, via transesterification reactions; GO:0000377 RNA splicing, via transesterification reactions with bulged adenosine as nucleophile; GO:0000398 mRNA splicing, via spliceosome; GO:0000956 nuclear-transcribed mRNA catabolic process; GO:0006139 nucleobase-containing compound metabolic process; GO:…	GO:0005622 intracellular anatomical structure; GO:0005634 nucleus; GO:0005635 nuclear envelope; GO:0005654 nucleoplasm; GO:0005681 spliceosomal complex; GO:0005737 cytoplasm; GO:0005829 cytosol; GO:0005845 mRNA cap binding complex; GO:0005846 nuclear cap binding complex; GO:0012505 endomembrane system; GO:0031967 organelle envelope; GO:0031974 membrane-enclosed lumen; GO:0031975 envelope; GO:0031…	GO:0000339 RNA cap binding; GO:0000340 RNA 7-methylguanosine cap binding; GO:0003676 nucleic acid binding; GO:0003723 RNA binding; GO:0003729 mRNA binding; GO:0005488 binding; GO:0005515 protein binding; GO:0017069 snRNA binding; GO:0097159 organic cyclic compound binding; GO:1901363 heterocyclic compound binding;	PF00076	PF00076 RNA recognition motif. (a.k.a. RRM, RBD, or RNP domain)	A	KOG0121	Nuclear cap-binding protein complex, subunit CBP20 (RRM superfamily)
Q3ZBQ0	NAD-dependent protein deacylase sirtuin-5, mitochondrial OS=Bos taurus OX=9913 GN=SIRT5 PE=2 SV=1	SIRT5	63.7546	Up	33.988	25324.9	1.61458e+06	0.0308858	1.96911	mitochondria	K11415	SIRT5, SIR2L5; NAD+-dependent protein deacetylase sirtuin 5 [EC:2.3.1.286]	map00760 Nicotinate and nicotinamide metabolism; map01100 Metabolic pathways	GO:0006325 chromatin organization; GO:0006355 regulation of transcription, DNA-templated; GO:0006464 cellular protein modification process; GO:0006471 protein ADP-ribosylation; GO:0006476 protein deacetylation; GO:0006807 nitrogen compound metabolic process; GO:0006996 organelle organization; GO:0007005 mitochondrion organization; GO:0008152 metabolic process; GO:0009605 response to external stim…	GO:0005622 intracellular anatomical structure; GO:0005634 nucleus; GO:0005737 cytoplasm; GO:0005739 mitochondrion; GO:0005740 mitochondrial envelope; GO:0005743 mitochondrial inner membrane; GO:0005758 mitochondrial intermembrane space; GO:0005759 mitochondrial matrix; GO:0005829 cytosol; GO:0016020 membrane; GO:0019866 organelle inner membrane; GO:0031090 organelle membrane; GO:0031966 mitochond…	GO:0000166 nucleotide binding; GO:0003824 catalytic activity; GO:0003950 NAD+ ADP-ribosyltransferase activity; GO:0005488 binding; GO:0008270 zinc ion binding; GO:0016740 transferase activity; GO:0016757 glycosyltransferase activity; GO:0016763 pentosyltransferase activity; GO:0016787 hydrolase activity; GO:0016810 hydrolase activity, acting on carbon-nitrogen (but not peptide) bonds; GO:0016811 …			BK	KOG2684	Sirtuin 5 and related class III sirtuins (SIR2 family)
Q3ZCC3	TNF receptor-associated factor 6 OS=Bos taurus OX=9913 GN=TRAF6 PE=2 SV=1	TRAF6	2.2335	Up	61.6466	5311.8	11863.9	0.618525	1.38148	nucleus	K03175	TRAF6; TNF receptor-associated factor 6 [EC:2.3.2.27]	map04010 MAPK signaling pathway; map04013 MAPK signaling pathway - fly; map04064 NF-kappa B signaling pathway; map04120 Ubiquitin mediated proteolysis; map04140 Autophagy - animal; map04144 Endocytosis; map04214 Apoptosis - fly; map04380 Osteoclast differentiation; map04620 Toll-like receptor signaling pathway; map04621 NOD-like receptor signaling pathway; map04622 RIG-I-like receptor signaling p…	GO:0000122 negative regulation of transcription by RNA polymerase II; GO:0000165 MAPK cascade; GO:0000209 protein polyubiquitination; GO:0001503 ossification; GO:0001700 embryonic development via the syncytial blastoderm; GO:0001773 myeloid dendritic cell activation; GO:0001775 cell activation; GO:0001817 regulation of cytokine production; GO:0001819 positive regulation of cytokine production; GO…	GO:0005622 intracellular anatomical structure; GO:0005634 nucleus; GO:0005737 cytoplasm; GO:0005768 endosome; GO:0005811 lipid droplet; GO:0005829 cytosol; GO:0005886 plasma membrane; GO:0005887 integral component of plasma membrane; GO:0009898 cytoplasmic side of plasma membrane; GO:0010008 endosome membrane; GO:0012505 endomembrane system; GO:0016020 membrane; GO:0016021 integral component of m…	GO:0003824 catalytic activity; GO:0004842 ubiquitin-protein transferase activity; GO:0005102 signaling receptor binding; GO:0005126 cytokine receptor binding; GO:0005164 tumor necrosis factor receptor binding; GO:0005488 binding; GO:0005515 protein binding; GO:0008270 zinc ion binding; GO:0016740 transferase activity; GO:0019787 ubiquitin-like protein transferase activity; GO:0019899 enzyme bindi…	PF13923; PF18048	PF13923 Zinc finger, C3HC4 type (RING finger); PF18048 TNF receptor-associated factor 6 zinc finger 2	T	KOG0297	TNF receptor-associated factor
Q58CN8	Sestrin-2 OS=Bos taurus OX=9913 GN=SESN2 PE=2 SV=2	SESN2	0.64724	Down	53.5998	20504.2	13271.1	1.21415	0.785848	nucleus	K20394	SESN2; sestrin 2	map04115 p53 signaling pathway; map04150 mTOR signaling pathway; map04211 Longevity regulating pathway	GO:0000002 mitochondrial genome maintenance; GO:0000422 autophagy of mitochondrion; GO:0001101 response to acid chemical; GO:0001558 regulation of cell growth; GO:0001932 regulation of protein phosphorylation; GO:0006082 organic acid metabolic process; GO:0006109 regulation of carbohydrate metabolic process; GO:0006111 regulation of gluconeogenesis; GO:0006139 nucleobase-containing compound metab…	GO:0005622 intracellular anatomical structure; GO:0005737 cytoplasm; GO:0005829 cytosol;	GO:0003824 catalytic activity; GO:0005092 GDP-dissociation inhibitor activity; GO:0005488 binding; GO:0016209 antioxidant activity; GO:0016491 oxidoreductase activity; GO:0016597 amino acid binding; GO:0016667 oxidoreductase activity, acting on a sulfur group of donors; GO:0016684 oxidoreductase activity, acting on peroxide as acceptor; GO:0030234 enzyme regulator activity; GO:0030695 GTPase regu…			S	KOG3746	Uncharacterized conserved protein
Q58DI5	Polyisoprenoid diphosphate/phosphate phosphohydrolase PLPP6 OS=Bos taurus OX=9913 GN=PLPP6 PE=2 SV=1	PLPP6	0.503835	Down	31.8862	19088.8	9617.61	1.32993	0.670066	plasma membrane	K22904	PLPP6; presqualene diphosphate phosphatase [EC:3.1.3.-]		GO:0006066 alcohol metabolic process; GO:0006629 lipid metabolic process; GO:0006694 steroid biosynthetic process; GO:0006695 cholesterol biosynthetic process; GO:0006793 phosphorus metabolic process; GO:0006796 phosphate-containing compound metabolic process; GO:0008152 metabolic process; GO:0008202 steroid metabolic process; GO:0008203 cholesterol metabolic process; GO:0008610 lipid biosyntheti…	GO:0005886 plasma membrane; GO:0016020 membrane; GO:0071944 cell periphery;	GO:0003824 catalytic activity; GO:0016787 hydrolase activity; GO:0016788 hydrolase activity, acting on ester bonds; GO:0016791 phosphatase activity; GO:0042577 lipid phosphatase activity; GO:0042578 phosphoric ester hydrolase activity;			S	KOG4268	Uncharacterized conserved protein containing PAP2 domain
Q5E9M7	exodeoxyribonuclease III OS=Bos taurus OX=9913 GN=TREX1 PE=2 SV=1	TREX1	2.12261	Up	33.1624	20832.3	44218.7	0.640491	1.35951	mitochondria	K10790	TREX1; three prime repair exonuclease 1 [EC:3.1.11.2]	map04623 Cytosolic DNA-sensing pathway	GO:0001817 regulation of cytokine production; GO:0006139 nucleobase-containing compound metabolic process; GO:0006259 DNA metabolic process; GO:0006260 DNA replication; GO:0006281 DNA repair; GO:0006298 mismatch repair; GO:0006310 DNA recombination; GO:0006725 cellular aromatic compound metabolic process; GO:0006807 nitrogen compound metabolic process; GO:0006950 response to stress; GO:0006974 ce…	GO:0005622 intracellular anatomical structure; GO:0005634 nucleus; GO:0005635 nuclear envelope; GO:0005737 cytoplasm; GO:0005783 endoplasmic reticulum; GO:0005789 endoplasmic reticulum membrane; GO:0005829 cytosol; GO:0012505 endomembrane system; GO:0016020 membrane; GO:0031967 organelle envelope; GO:0031975 envelope; GO:0031984 organelle subcompartment; GO:0042175 nuclear outer membrane-endoplas…	GO:0000166 nucleotide binding; GO:0003676 nucleic acid binding; GO:0003677 DNA binding; GO:0003690 double-stranded DNA binding; GO:0003697 single-stranded DNA binding; GO:0003824 catalytic activity; GO:0004518 nuclease activity; GO:0004527 exonuclease activity; GO:0004529 exodeoxyribonuclease activity; GO:0004536 deoxyribonuclease activity; GO:0005488 binding; GO:0005515 protein binding; GO:00082…			L	KOG4793	Three prime repair exonuclease
A0A140T843	Beta-2-glycoprotein 1 OS=Bos taurus OX=9913 GN=APOH PE=4 SV=1	APOH	0.515731	Down	38.2451	72171.6	37221.1	1.3195	0.680505	extracellular	K17305	APOH, B2G1; beta-2-glycoprotein 1	map04979 Cholesterol metabolism	GO:0001936 regulation of endothelial cell proliferation; GO:0001937 negative regulation of endothelial cell proliferation; GO:0002576 platelet degranulation; GO:0006508 proteolysis; GO:0006629 lipid metabolic process; GO:0006638 neutral lipid metabolic process; GO:0006639 acylglycerol metabolic process; GO:0006641 triglyceride metabolic process; GO:0006807 nitrogen compound metabolic process; GO:…	GO:0005576 extracellular region; GO:0005615 extracellular space; GO:0005622 intracellular anatomical structure; GO:0005737 cytoplasm; GO:0005886 plasma membrane; GO:0009986 cell surface; GO:0012505 endomembrane system; GO:0016020 membrane; GO:0030141 secretory granule; GO:0031089 platelet dense granule lumen; GO:0031410 cytoplasmic vesicle; GO:0031974 membrane-enclosed lumen; GO:0031982 vesicle; …	GO:0005488 binding; GO:0005515 protein binding; GO:0005543 phospholipid binding; GO:0008047 enzyme activator activity; GO:0008289 lipid binding; GO:0030234 enzyme regulator activity; GO:0042802 identical protein binding; GO:0043167 ion binding; GO:0043168 anion binding; GO:0060229 lipase activator activity; GO:0060230 lipoprotein lipase activator activity; GO:0098772 molecular function regulator;	PF00084; PF09014	PF00084 Sushi repeat (SCR repeat); PF09014 Beta-2-glycoprotein-1 fifth domain	TV	KOG4297	C-type lectin
A0A3Q1LYK8	Katanin p80 WD40 repeat-containing subunit B1 OS=Bos taurus OX=9913 GN=KATNB1 PE=3 SV=1	KATNB1	1.8328	Up	76.0054	4046.1	7415.68	0.706016	1.29398	cytoplasm	K18643	KATNB1; katanin p80 WD40 repeat-containing subunit B1		GO:0000003 reproduction; GO:0000226 microtubule cytoskeleton organization; GO:0002064 epithelial cell development; GO:0002065 columnar/cuboidal epithelial cell differentiation; GO:0002066 columnar/cuboidal epithelial cell development; GO:0003006 developmental process involved in reproduction; GO:0006605 protein targeting; GO:0006810 transport; GO:0006886 intracellular protein transport; GO:000699…	GO:0000922 spindle pole; GO:0005622 intracellular anatomical structure; GO:0005737 cytoplasm; GO:0005813 centrosome; GO:0005815 microtubule organizing center; GO:0005819 spindle; GO:0005829 cytosol; GO:0005856 cytoskeleton; GO:0005874 microtubule; GO:0005875 microtubule associated complex; GO:0005886 plasma membrane; GO:0008352 katanin complex; GO:0015630 microtubule cytoskeleton; GO:0016020 memb…	GO:0005488 binding; GO:0005515 protein binding; GO:0008017 microtubule binding; GO:0008092 cytoskeletal protein binding; GO:0015631 tubulin binding; GO:0044877 protein-containing complex binding; GO:0046982 protein heterodimerization activity; GO:0046983 protein dimerization activity; GO:0070840 dynein complex binding;	PF13925	PF13925 con80 domain of Katanin	D	KOG0267	Microtubule severing protein katanin p80 subunit B (contains WD40 repeats)
A0A3Q1M460	Myotubularin OS=Bos taurus OX=9913 GN=MTM1 PE=3 SV=1	MTM1	1.57927	Up	69.3475	13497.8	21316.7	0.775414	1.22459	cytoplasm	K01108	MTM1; myotubularin [EC:3.1.3.64 3.1.3.95]	map00562 Inositol phosphate metabolism; map01100 Metabolic pathways; map04070 Phosphatidylinositol signaling system	GO:0000278 mitotic cell cycle; GO:0006464 cellular protein modification process; GO:0006470 protein dephosphorylation; GO:0006629 lipid metabolic process; GO:0006644 phospholipid metabolic process; GO:0006650 glycerophospholipid metabolic process; GO:0006661 phosphatidylinositol biosynthetic process; GO:0006793 phosphorus metabolic process; GO:0006796 phosphate-containing compound metabolic proce…	GO:0001726 ruffle; GO:0005622 intracellular anatomical structure; GO:0005737 cytoplasm; GO:0005768 endosome; GO:0005770 late endosome; GO:0005829 cytosol; GO:0005886 plasma membrane; GO:0005938 cell cortex; GO:0012505 endomembrane system; GO:0016020 membrane; GO:0030016 myofibril; GO:0030017 sarcomere; GO:0030175 filopodium; GO:0031252 cell leading edge; GO:0031410 cytoplasmic vesicle; GO:0031674…	GO:0003824 catalytic activity; GO:0004438 phosphatidylinositol-3-phosphatase activity; GO:0004721 phosphoprotein phosphatase activity; GO:0005488 binding; GO:0005515 protein binding; GO:0005543 phospholipid binding; GO:0005546 phosphatidylinositol-4,5-bisphosphate binding; GO:0008138 protein tyrosine/serine/threonine phosphatase activity; GO:0008289 lipid binding; GO:0016787 hydrolase activity; G…	PF02893; PF06602	PF02893 GRAM domain; PF06602 Myotubularin-like phosphatase domain	IU	KOG4471	Phosphatidylinositol 3-phosphate 3-phosphatase myotubularin MTM1
A0A3Q1MSB5	Junctional adhesion molecule A OS=Bos taurus OX=9913 GN=F11R PE=3 SV=1	F11R	1.73436	Up	34.6341	26831.4	46535.3	0.731432	1.26857	extracellular	K06089	F11R, JAM1, CD321; junctional adhesion molecule 1	map04514 Cell adhesion molecules; map04530 Tight junction; map04670 Leukocyte transendothelial migration	GO:0001817 regulation of cytokine production; GO:0001885 endothelial cell development; GO:0002064 epithelial cell development; GO:0002376 immune system process; GO:0003008 system process; GO:0003013 circulatory system process; GO:0003158 endothelium development; GO:0006810 transport; GO:0006928 movement of cell or subcellular component; GO:0006950 response to stress; GO:0006952 defense response; …	GO:0005622 intracellular anatomical structure; GO:0005737 cytoplasm; GO:0005886 plasma membrane; GO:0005911 cell-cell junction; GO:0005923 bicellular tight junction; GO:0016020 membrane; GO:0030054 cell junction; GO:0031410 cytoplasmic vesicle; GO:0031982 vesicle; GO:0036056 filtration diaphragm; GO:0036057 slit diaphragm; GO:0043226 organelle; GO:0043227 membrane-bounded organelle; GO:0043229 in…	GO:0005488 binding; GO:0005515 protein binding; GO:0019904 protein domain specific binding; GO:0030165 PDZ domain binding;	PF07686; PF13927	PF07686 Immunoglobulin V-set domain; PF13927 Immunoglobulin domain
A0A3Q1NBB6	WW domain containing transcription regulator 1 OS=Bos taurus OX=9913 GN=WWTR1 PE=4 SV=1	WWTR1	3.44448	Up	45.6861	1052.61	3625.68	0.449996	1.55	nucleus	K16820	WWTR1, TAZ; WW domain-containing transcription regulator protein 1	map04390 Hippo signaling pathway; map04392 Hippo signaling pathway - multiple species	GO:0000122 negative regulation of transcription by RNA polymerase II; GO:0001503 ossification; GO:0001649 osteoblast differentiation; GO:0001655 urogenital system development; GO:0001822 kidney development; GO:0001894 tissue homeostasis; GO:0001932 regulation of protein phosphorylation; GO:0001933 negative regulation of protein phosphorylation; GO:0003008 system process; GO:0003013 circulatory sy…	GO:0005622 intracellular anatomical structure; GO:0005634 nucleus; GO:0005654 nucleoplasm; GO:0005667 transcription regulator complex; GO:0005737 cytoplasm; GO:0005829 cytosol; GO:0016604 nuclear body; GO:0031974 membrane-enclosed lumen; GO:0031981 nuclear lumen; GO:0032991 protein-containing complex; GO:0043226 organelle; GO:0043227 membrane-bounded organelle; GO:0043229 intracellular organelle;…	GO:0003712 transcription coregulator activity; GO:0003713 transcription coactivator activity; GO:0003714 transcription corepressor activity; GO:0005488 binding; GO:0005515 protein binding; GO:0042802 identical protein binding; GO:0042803 protein homodimerization activity; GO:0046983 protein dimerization activity; GO:0140110 transcription regulator activity;	PF00397	PF00397 WW domain	O	KOG0940	Ubiquitin protein ligase RSP5/NEDD4
A0A452DKA8	Inositol-tetrakisphosphate 1-kinase OS=Bos taurus OX=9913 GN=ITPK1 PE=3 SV=1	ITPK1	2.9301	Up	45.8282	8909.83	26106.7	0.508893	1.49111	cytoplasm,nucleus	K00913	ITPK1; inositol-1,3,4-trisphosphate 5/6-kinase / inositol-tetrakisphosphate 1-kinase [EC:2.7.1.159 2.7.1.134]	map00562 Inositol phosphate metabolism; map01100 Metabolic pathways; map04070 Phosphatidylinositol signaling system	GO:0006066 alcohol metabolic process; GO:0006793 phosphorus metabolic process; GO:0006796 phosphate-containing compound metabolic process; GO:0006950 response to stress; GO:0007154 cell communication; GO:0007165 signal transduction; GO:0007275 multicellular organism development; GO:0007399 nervous system development; GO:0007596 blood coagulation; GO:0007599 hemostasis; GO:0008152 metabolic proces…	GO:0005622 intracellular anatomical structure; GO:0005737 cytoplasm; GO:0005829 cytosol; GO:0005886 plasma membrane; GO:0016020 membrane; GO:0016324 apical plasma membrane; GO:0045177 apical part of cell; GO:0071944 cell periphery; GO:0098590 plasma membrane region;	GO:0003824 catalytic activity; GO:0016301 kinase activity; GO:0016740 transferase activity; GO:0016772 transferase activity, transferring phosphorus-containing groups; GO:0016773 phosphotransferase activity, alcohol group as acceptor; GO:0016787 hydrolase activity; GO:0016788 hydrolase activity, acting on ester bonds; GO:0016791 phosphatase activity; GO:0042578 phosphoric ester hydrolase activity…	PF17927; PF05770	PF17927 Inositol 1,3,4-trisphosphate 5/6-kinase pre-ATP-grasp domain; PF05770 Inositol 1,3,4-trisphosphate 5/6-kinase ATP-grasp domain
A4FUG0	SNARE-associated protein Snapin OS=Bos taurus OX=9913 GN=SNAPIN PE=2 SV=1	SNAPIN	0.481956	Down	14.8499	9015.97	4345.3	1.34957	0.650433	nucleus	K20002	SNAPIN, BLOC1S7; SNARE-associated protein Snapin		GO:0001505 regulation of neurotransmitter levels; GO:0006807 nitrogen compound metabolic process; GO:0006810 transport; GO:0006836 neurotransmitter transport; GO:0006873 cellular ion homeostasis; GO:0006885 regulation of pH; GO:0006886 intracellular protein transport; GO:0006887 exocytosis; GO:0006906 vesicle fusion; GO:0006914 autophagy; GO:0006928 movement of cell or subcellular component; GO:0…	GO:0005622 intracellular anatomical structure; GO:0005737 cytoplasm; GO:0005829 cytosol; GO:0008021 synaptic vesicle; GO:0012505 endomembrane system; GO:0030133 transport vesicle; GO:0030141 secretory granule; GO:0031082 BLOC complex; GO:0031083 BLOC-1 complex; GO:0031410 cytoplasmic vesicle; GO:0031982 vesicle; GO:0032991 protein-containing complex; GO:0043226 organelle; GO:0043227 membrane-boun…	GO:0000149 SNARE binding; GO:0005488 binding; GO:0005515 protein binding;
A4FV48	Acyl-CoA 6-desaturase OS=Bos taurus OX=9913 GN=FADS2 PE=2 SV=1	FADS2	1.55912	Up	52.5326	7695.79	11998.6	0.78152	1.21848	plasma membrane	K10226	FADS2; acyl-CoA 6-desaturase (Delta-6 desaturase) [EC:1.14.19.3]	map00592 alpha-Linolenic acid metabolism; map01040 Biosynthesis of unsaturated fatty acids; map01100 Metabolic pathways; map01212 Fatty acid metabolism; map03320 PPAR signaling pathway	GO:0000038 very long-chain fatty acid metabolic process; GO:0001676 long-chain fatty acid metabolic process; GO:0001889 liver development; GO:0006082 organic acid metabolic process; GO:0006629 lipid metabolic process; GO:0006631 fatty acid metabolic process; GO:0006633 fatty acid biosynthetic process; GO:0006636 unsaturated fatty acid biosynthetic process; GO:0007275 multicellular organism develo…	GO:0005622 intracellular anatomical structure; GO:0005737 cytoplasm; GO:0005783 endoplasmic reticulum; GO:0005789 endoplasmic reticulum membrane; GO:0005886 plasma membrane; GO:0005887 integral component of plasma membrane; GO:0012505 endomembrane system; GO:0016020 membrane; GO:0016021 integral component of membrane; GO:0031224 intrinsic component of membrane; GO:0031226 intrinsic component of p…	GO:0003824 catalytic activity; GO:0004768 stearoyl-CoA 9-desaturase activity; GO:0016213 linoleoyl-CoA desaturase activity; GO:0016215 acyl-CoA desaturase activity; GO:0016491 oxidoreductase activity; GO:0016705 oxidoreductase activity, acting on paired donors, with incorporation or reduction of molecular oxygen; GO:0016717 oxidoreductase activity, acting on paired donors, with oxidation of a pai…	PF00173; PF00487	PF00173 Cytochrome b5-like Heme/Steroid binding domain; PF00487 Fatty acid desaturase	I	KOG4232	Delta 6-fatty acid desaturase/delta-8 sphingolipid desaturase
A5PK13	Volume-regulated anion channel subunit LRRC8C OS=Bos taurus OX=9913 GN=LRRC8C PE=2 SV=1	LRRC8C	1.54181	Up	92.3194	15044.9	23196.3	0.786841	1.21316	plasma membrane	K22038	LRRC8; volume-regulated anion channel		GO:0006810 transport; GO:0006811 ion transport; GO:0006820 anion transport; GO:0007154 cell communication; GO:0007165 signal transduction; GO:0009987 cellular process; GO:0015698 inorganic anion transport; GO:0023052 signaling; GO:0030154 cell differentiation; GO:0032502 developmental process; GO:0034220 ion transmembrane transport; GO:0045444 fat cell differentiation; GO:0048869 cellular develop…	GO:0005622 intracellular anatomical structure; GO:0005737 cytoplasm; GO:0005783 endoplasmic reticulum; GO:0005886 plasma membrane; GO:0005887 integral component of plasma membrane; GO:0012505 endomembrane system; GO:0016020 membrane; GO:0016021 integral component of membrane; GO:0031224 intrinsic component of membrane; GO:0031226 intrinsic component of plasma membrane; GO:0032991 protein-containi…	GO:0005215 transporter activity; GO:0005216 ion channel activity; GO:0005225 volume-sensitive anion channel activity; GO:0005253 anion channel activity; GO:0008509 anion transmembrane transporter activity; GO:0015075 ion transmembrane transporter activity; GO:0015103 inorganic anion transmembrane transporter activity; GO:0015267 channel activity; GO:0015318 inorganic molecular entity transmembran…			R	KOG0619	FOG: Leucine rich repeat
A6QLR3	BRISC complex subunit Abraxas 2 OS=Bos taurus OX=9913 GN=ABRAXAS2 PE=2 SV=2	ABRAXAS2	0.550369	Down	46.1381	13233	7283.01	1.29002	0.709984	plasma membrane	K20799	FAM175B, ABRO1; BRISC complex subunit Abro1		GO:0000226 microtubule cytoskeleton organization; GO:0000278 mitotic cell cycle; GO:0000280 nuclear division; GO:0002931 response to ischemia; GO:0006464 cellular protein modification process; GO:0006508 proteolysis; GO:0006807 nitrogen compound metabolic process; GO:0006950 response to stress; GO:0006996 organelle organization; GO:0007010 cytoskeleton organization; GO:0007017 microtubule-based p…	GO:0005622 intracellular anatomical structure; GO:0005634 nucleus; GO:0005737 cytoplasm; GO:0005829 cytosol; GO:0032991 protein-containing complex; GO:0043226 organelle; GO:0043227 membrane-bounded organelle; GO:0043229 intracellular organelle; GO:0043231 intracellular membrane-bounded organelle; GO:0070552 BRISC complex;	GO:0005488 binding; GO:0005515 protein binding; GO:0008017 microtubule binding; GO:0008092 cytoskeletal protein binding; GO:0015631 tubulin binding; GO:0031593 polyubiquitin modification-dependent protein binding; GO:0140030 modification-dependent protein binding;
A6QPH1	Partner of Y14 and mago OS=Bos taurus OX=9913 GN=PYM1 PE=2 SV=1	PYM1	2.06444	Up	22.6626	21537	44461.9	0.652647	1.34735	cytoplasm	K14294	WIBG, PYM; partner of Y14 and mago	map03013 Nucleocytoplasmic transport; map03015 mRNA surveillance pathway	GO:0000184 nuclear-transcribed mRNA catabolic process, nonsense-mediated decay; GO:0000956 nuclear-transcribed mRNA catabolic process; GO:0006139 nucleobase-containing compound metabolic process; GO:0006401 RNA catabolic process; GO:0006402 mRNA catabolic process; GO:0006417 regulation of translation; GO:0006725 cellular aromatic compound metabolic process; GO:0006807 nitrogen compound metabolic …	GO:0005622 intracellular anatomical structure; GO:0005634 nucleus; GO:0005730 nucleolus; GO:0005737 cytoplasm; GO:0005829 cytosol; GO:0030054 cell junction; GO:0031974 membrane-enclosed lumen; GO:0031981 nuclear lumen; GO:0032991 protein-containing complex; GO:0035145 exon-exon junction complex; GO:0043226 organelle; GO:0043227 membrane-bounded organelle; GO:0043228 non-membrane-bounded organelle…	GO:0003676 nucleic acid binding; GO:0003723 RNA binding; GO:0005488 binding; GO:0005515 protein binding; GO:0043021 ribonucleoprotein complex binding; GO:0043022 ribosome binding; GO:0044877 protein-containing complex binding; GO:0097159 organic cyclic compound binding; GO:1901363 heterocyclic compound binding; GO:1990448 exon-exon junction complex binding;	PF09282	PF09282 Mago binding	S	KOG4325	Uncharacterized conserved protein
E1B9H3	Cell cycle and apoptosis regulator 2 OS=Bos taurus OX=9913 GN=CCAR2 PE=4 SV=1	CCAR2	1.55086	Up	101.933	28433.1	44095.9	0.784048	1.21595	mitochondria	K25816	CCAR2, DBC1; cell cycle and apoptosis regulator protein 2		GO:0001558 regulation of cell growth; GO:0006139 nucleobase-containing compound metabolic process; GO:0006355 regulation of transcription, DNA-templated; GO:0006396 RNA processing; GO:0006725 cellular aromatic compound metabolic process; GO:0006807 nitrogen compound metabolic process; GO:0006915 apoptotic process; GO:0006996 organelle organization; GO:0007005 mitochondrion organization; GO:000815…	GO:0000228 nuclear chromosome; GO:0000785 chromatin; GO:0005622 intracellular anatomical structure; GO:0005634 nucleus; GO:0005654 nucleoplasm; GO:0005694 chromosome; GO:0005737 cytoplasm; GO:0005739 mitochondrion; GO:0005759 mitochondrial matrix; GO:0031974 membrane-enclosed lumen; GO:0031981 nuclear lumen; GO:0032991 protein-containing complex; GO:0043226 organelle; GO:0043227 membrane-bounded …	GO:0000993 RNA polymerase II complex binding; GO:0001098 basal transcription machinery binding; GO:0001099 basal RNA polymerase II transcription machinery binding; GO:0004857 enzyme inhibitor activity; GO:0005488 binding; GO:0005515 protein binding; GO:0019899 enzyme binding; GO:0030234 enzyme regulator activity; GO:0043175 RNA polymerase core enzyme binding; GO:0044877 protein-containing complex…	PF14444; PF19257; PF14443; PF19256	PF14444 S1-like; PF19257 BURAN domain; PF14443 DBC1; PF19256 LAIKA domain	R	KOG4246	Predicted DNA-binding protein, contains SAP domain
E1BJY4	Platelet-derived growth factor C OS=Bos taurus OX=9913 GN=PDGFC PE=3 SV=3	PDGFC	2.28666	Up	44.1824	4825.01	11033.2	0.60852	1.39148	plasma membrane	K05450	PDGFC_D; platelet derived growth factor C/D	map04010 MAPK signaling pathway; map04014 Ras signaling pathway; map04015 Rap1 signaling pathway; map04020 Calcium signaling pathway; map04072 Phospholipase D signaling pathway; map04151 PI3K-Akt signaling pathway; map04510 Focal adhesion; map04540 Gap junction; map04810 Regulation of actin cytoskeleton	GO:0001101 response to acid chemical; GO:0001501 skeletal system development; GO:0001932 regulation of protein phosphorylation; GO:0001934 positive regulation of protein phosphorylation; GO:0006950 response to stress; GO:0007154 cell communication; GO:0007165 signal transduction; GO:0007166 cell surface receptor signaling pathway; GO:0007167 enzyme linked receptor protein signaling pathway; GO:00…	GO:0000139 Golgi membrane; GO:0005576 extracellular region; GO:0005615 extracellular space; GO:0005622 intracellular anatomical structure; GO:0005737 cytoplasm; GO:0005783 endoplasmic reticulum; GO:0005788 endoplasmic reticulum lumen; GO:0005794 Golgi apparatus; GO:0005829 cytosol; GO:0005886 plasma membrane; GO:0009986 cell surface; GO:0012505 endomembrane system; GO:0016020 membrane; GO:0031090…	GO:0005102 signaling receptor binding; GO:0005161 platelet-derived growth factor receptor binding; GO:0005488 binding; GO:0005515 protein binding; GO:0042802 identical protein binding; GO:0042803 protein homodimerization activity; GO:0046983 protein dimerization activity; GO:0070851 growth factor receptor binding;	PF00431; PF00341	PF00431 CUB domain; PF00341 PDGF/VEGF domain
E1BMW9	Purine rich element binding protein A OS=Bos taurus OX=9913 GN=PURA PE=3 SV=2	PURA	0.54524	Down	34.8807	51553.9	28109.2	1.2943	0.705703	cytoplasm	K21772	PURA; transcriptional activator protein Pur-alpha		GO:0000003 reproduction; GO:0000075 cell cycle checkpoint signaling; GO:0000278 mitotic cell cycle; GO:0003006 developmental process involved in reproduction; GO:0006139 nucleobase-containing compound metabolic process; GO:0006259 DNA metabolic process; GO:0006260 DNA replication; GO:0006261 DNA-dependent DNA replication; GO:0006268 DNA unwinding involved in DNA replication; GO:0006270 DNA replic…	GO:0000228 nuclear chromosome; GO:0000781 chromosome, telomeric region; GO:0005622 intracellular anatomical structure; GO:0005634 nucleus; GO:0005657 replication fork; GO:0005662 DNA replication factor A complex; GO:0005694 chromosome; GO:0005737 cytoplasm; GO:0030425 dendrite; GO:0030894 replisome; GO:0031974 membrane-enclosed lumen; GO:0031981 nuclear lumen; GO:0032991 protein-containing comple…	GO:0000900 translation repressor activity, mRNA regulatory element binding; GO:0000981 DNA-binding transcription factor activity, RNA polymerase II-specific; GO:0001067 transcription regulatory region nucleic acid binding; GO:0003676 nucleic acid binding; GO:0003677 DNA binding; GO:0003690 double-stranded DNA binding; GO:0003691 double-stranded telomeric DNA binding; GO:0003697 single-stranded DN…			K	KOG3074	Transcriptional regulator of the PUR family, single-stranded-DNA-binding
F1MG06	Regulatory associated protein of MTOR complex 1 OS=Bos taurus OX=9913 GN=RPTOR PE=3 SV=3	RPTOR	0.211317	Down	149.521	20020.2	4230.61	1.6511	0.348905	cytoplasm	K07204	RAPTOR; regulatory associated protein of mTOR	map04136 Autophagy - other; map04140 Autophagy - animal; map04150 mTOR signaling pathway; map04151 PI3K-Akt signaling pathway; map04152 AMPK signaling pathway; map04211 Longevity regulating pathway; map04213 Longevity regulating pathway - multiple species; map04714 Thermogenesis; map04910 Insulin signaling pathway	GO:0000003 reproduction; GO:0001101 response to acid chemical; GO:0001558 regulation of cell growth; GO:0001932 regulation of protein phosphorylation; GO:0001934 positive regulation of protein phosphorylation; GO:0002119 nematode larval development; GO:0002164 larval development; GO:0002165 instar larval or pupal development; GO:0003006 developmental process involved in reproduction; GO:0006914 a…	GO:0005622 intracellular anatomical structure; GO:0005737 cytoplasm; GO:0031931 TORC1 complex; GO:0032991 protein-containing complex; GO:0038201 TOR complex;	GO:0005488 binding; GO:0005515 protein binding; GO:0008047 enzyme activator activity; GO:0019207 kinase regulator activity; GO:0019209 kinase activator activity; GO:0019887 protein kinase regulator activity; GO:0030234 enzyme regulator activity; GO:0030295 protein kinase activator activity; GO:0030674 protein-macromolecule adaptor activity; GO:0060090 molecular adaptor activity; GO:0098772 molecu…	PF14538	PF14538 Raptor N-terminal CASPase like domain	D	KOG1517	Guanine nucleotide binding protein MIP1
F1MVW3	Integrin beta OS=Bos taurus OX=9913 GN=ITGB8 PE=3 SV=2	ITGB8	0.658305	Down	85.5841	56692.2	37320.8	1.20605	0.79395	peroxisome	K06591	ITGB8; integrin beta 8	map04151 PI3K-Akt signaling pathway; map04510 Focal adhesion; map04512 ECM-receptor interaction; map04514 Cell adhesion molecules; map04810 Regulation of actin cytoskeleton	GO:0000003 reproduction; GO:0001501 skeletal system development; GO:0001568 blood vessel development; GO:0001890 placenta development; GO:0001944 vasculature development; GO:0003006 developmental process involved in reproduction; GO:0007155 cell adhesion; GO:0007275 multicellular organism development; GO:0009888 tissue development; GO:0009892 negative regulation of metabolic process; GO:0009893 p…	GO:0005886 plasma membrane; GO:0005887 integral component of plasma membrane; GO:0008305 integrin complex; GO:0009986 cell surface; GO:0016020 membrane; GO:0016021 integral component of membrane; GO:0031224 intrinsic component of membrane; GO:0031226 intrinsic component of plasma membrane; GO:0032991 protein-containing complex; GO:0034686 integrin alphav-beta8 complex; GO:0043235 receptor complex…	GO:0005488 binding; GO:0005515 protein binding; GO:1990430 extracellular matrix protein binding;	PF17205; PF00362; PF07974	PF17205 Integrin plexin domain; PF00362 Integrin beta chain VWA domain; PF07974 EGF-like domain	TW	KOG1226	Integrin beta subunit (N-terminal portion of extracellular region)
F1MZV2	Charged multivesicular body protein 5 OS=Bos taurus OX=9913 GN=CHMP5 PE=3 SV=1	CHMP5	1.63209	Up	24.5888	39410.9	64322.1	0.759853	1.24015	mitochondria	K12198	CHMP5, VPS60; charged multivesicular body protein 5	map04144 Endocytosis; map04217 Necroptosis	GO:0000070 mitotic sister chromatid segregation; GO:0000278 mitotic cell cycle; GO:0000280 nuclear division; GO:0000819 sister chromatid segregation; GO:0000920 septum digestion after cytokinesis; GO:0001919 regulation of receptor recycling; GO:0006810 transport; GO:0006996 organelle organization; GO:0006997 nucleus organization; GO:0007032 endosome organization; GO:0007033 vacuole organization; …	GO:0000815 ESCRT III complex; GO:0005622 intracellular anatomical structure; GO:0005634 nucleus; GO:0005737 cytoplasm; GO:0005768 endosome; GO:0005829 cytosol; GO:0010008 endosome membrane; GO:0012505 endomembrane system; GO:0016020 membrane; GO:0031090 organelle membrane; GO:0031410 cytoplasmic vesicle; GO:0031982 vesicle; GO:0032991 protein-containing complex; GO:0036452 ESCRT complex; GO:00432…				U	KOG1655	Protein involved in vacuolar protein sorting
F1N5A4	Ubiquinone biosynthesis O-methyltransferase, mitochondrial OS=Bos taurus OX=9913 GN=COQ3 PE=3 SV=2	COQ3	0.665328	Down	41.4862	121662	80945.1	1.20096	0.799035	mitochondria	K00591	COQ3; polyprenyldihydroxybenzoate methyltransferase / 3-demethylubiquinol 3-O-methyltransferase [EC:2.1.1.114 2.1.1.64]	map00130 Ubiquinone and other terpenoid-quinone biosynthesis; map01100 Metabolic pathways; map01240 Biosynthesis of cofactors	GO:0002119 nematode larval development; GO:0002164 larval development; GO:0005975 carbohydrate metabolic process; GO:0006066 alcohol metabolic process; GO:0006071 glycerol metabolic process; GO:0006743 ubiquinone metabolic process; GO:0006744 ubiquinone biosynthetic process; GO:0006950 response to stress; GO:0007275 multicellular organism development; GO:0008152 metabolic process; GO:0009058 bios…	GO:0005622 intracellular anatomical structure; GO:0005737 cytoplasm; GO:0005739 mitochondrion; GO:0005740 mitochondrial envelope; GO:0005743 mitochondrial inner membrane; GO:0005759 mitochondrial matrix; GO:0016020 membrane; GO:0019866 organelle inner membrane; GO:0019898 extrinsic component of membrane; GO:0031090 organelle membrane; GO:0031312 extrinsic component of organelle membrane; GO:00313…	GO:0003824 catalytic activity; GO:0004395 hexaprenyldihydroxybenzoate methyltransferase activity; GO:0008168 methyltransferase activity; GO:0008171 O-methyltransferase activity; GO:0008757 S-adenosylmethionine-dependent methyltransferase activity; GO:0010420 3,4-dihydroxy-5-polyprenylbenzoic acid O-methyltransferase activity; GO:0016740 transferase activity; GO:0016741 transferase activity, trans…	PF13489	PF13489 Methyltransferase domain	H	KOG1270	Methyltransferases
P08728	Keratin, type I cytoskeletal 19 OS=Bos taurus OX=9913 GN=KRT19 PE=2 SV=1	KRT19	0.449466	Down	43.885	38243.5	17189.2	1.37982	0.620182	mitochondria	K07604	KRT1; type I keratin, acidic	map04915 Estrogen signaling pathway	GO:0000003 reproduction; GO:0001701 in utero embryonic development; GO:0001890 placenta development; GO:0001892 embryonic placenta development; GO:0003006 developmental process involved in reproduction; GO:0006996 organelle organization; GO:0007010 cytoskeleton organization; GO:0007154 cell communication; GO:0007165 signal transduction; GO:0007166 cell surface receptor signaling pathway; GO:00072…	GO:0005622 intracellular anatomical structure; GO:0005737 cytoplasm; GO:0005829 cytosol; GO:0005856 cytoskeleton; GO:0005882 intermediate filament; GO:0005886 plasma membrane; GO:0005938 cell cortex; GO:0015629 actin cytoskeleton; GO:0016010 dystrophin-associated glycoprotein complex; GO:0016020 membrane; GO:0016327 apicolateral plasma membrane; GO:0030016 myofibril; GO:0030017 sarcomere; GO:0030…	GO:0005198 structural molecule activity; GO:0005200 structural constituent of cytoskeleton; GO:0005488 binding; GO:0008307 structural constituent of muscle; GO:0044877 protein-containing complex binding;
P41500	Acylphosphatase-1 OS=Bos taurus OX=9913 GN=ACYP1 PE=1 SV=2	ACYP1	0.62355	Down	11.432	34965.2	21802.5	1.23187	0.768131	cytoplasm	K01512	acyP; acylphosphatase [EC:3.6.1.7]	map00620 Pyruvate metabolism; map01100 Metabolic pathways	GO:0006793 phosphorus metabolic process; GO:0006796 phosphate-containing compound metabolic process; GO:0008152 metabolic process; GO:0009987 cellular process; GO:0044237 cellular metabolic process;	GO:0005622 intracellular anatomical structure; GO:0005737 cytoplasm;	GO:0003824 catalytic activity; GO:0003998 acylphosphatase activity; GO:0016787 hydrolase activity; GO:0016817 hydrolase activity, acting on acid anhydrides; GO:0016818 hydrolase activity, acting on acid anhydrides, in phosphorus-containing anhydrides;	PF00708	PF00708 Acylphosphatase	C	KOG3360	Acylphosphatase
P48305	NADH dehydrogenase [ubiquinone] 1 beta subcomplex subunit 4 OS=Bos taurus OX=9913 GN=NDUFB4 PE=1 SV=2	NDUFB4	0.23058	Down	15.1843	92224.9	21265.2	1.62525	0.37475	cytoplasm,nucleus	K03960	NDUFB4; NADH dehydrogenase (ubiquinone) 1 beta subcomplex subunit 4	map00190 Oxidative phosphorylation; map01100 Metabolic pathways; map04714 Thermogenesis; map04723 Retrograde endocannabinoid signaling	GO:0006091 generation of precursor metabolites and energy; GO:0006119 oxidative phosphorylation; GO:0006120 mitochondrial electron transport, NADH to ubiquinone; GO:0006139 nucleobase-containing compound metabolic process; GO:0006163 purine nucleotide metabolic process; GO:0006725 cellular aromatic compound metabolic process; GO:0006753 nucleoside phosphate metabolic process; GO:0006793 phosphoru…	GO:0005622 intracellular anatomical structure; GO:0005634 nucleus; GO:0005635 nuclear envelope; GO:0005737 cytoplasm; GO:0005739 mitochondrion; GO:0005740 mitochondrial envelope; GO:0005743 mitochondrial inner membrane; GO:0005746 mitochondrial respirasome; GO:0005747 mitochondrial respiratory chain complex I; GO:0012505 endomembrane system; GO:0016020 membrane; GO:0019866 organelle inner membran…	GO:0003824 catalytic activity; GO:0003954 NADH dehydrogenase activity; GO:0008137 NADH dehydrogenase (ubiquinone) activity; GO:0016491 oxidoreductase activity; GO:0016651 oxidoreductase activity, acting on NAD(P)H; GO:0016655 oxidoreductase activity, acting on NAD(P)H, quinone or similar compound as acceptor; GO:0050136 NADH dehydrogenase (quinone) activity;
P50227	Sulfotransferase 1A1 OS=Bos taurus OX=9913 GN=SULT1A1 PE=1 SV=2	SULT1A1	1.51638	Up	34.1835	85891.6	130244	0.794794	1.20521	cytoplasm	K01014	SULT1A; aryl sulfotransferase [EC:2.8.2.1]		GO:0000165 MAPK cascade; GO:0003008 system process; GO:0003013 circulatory system process; GO:0006066 alcohol metabolic process; GO:0006067 ethanol metabolic process; GO:0006068 ethanol catabolic process; GO:0006082 organic acid metabolic process; GO:0006139 nucleobase-containing compound metabolic process; GO:0006163 purine nucleotide metabolic process; GO:0006464 cellular protein modification p…	GO:0005622 intracellular anatomical structure; GO:0005737 cytoplasm; GO:0005829 cytosol;	GO:0000166 nucleotide binding; GO:0003824 catalytic activity; GO:0004062 aryl sulfotransferase activity; GO:0005488 binding; GO:0005515 protein binding; GO:0008146 sulfotransferase activity; GO:0016740 transferase activity; GO:0016782 transferase activity, transferring sulphur-containing groups; GO:0017076 purine nucleotide binding; GO:0030554 adenyl nucleotide binding; GO:0032553 ribonucleotide …	PF00685	PF00685 Sulfotransferase domain	R	KOG1584	Sulfotransferase
P68301	Metallothionein-2 OS=Bos taurus OX=9913 GN=MT2A PE=1 SV=1	MT2A	2.29483	Up	6.02813	7988.58	18332.5	0.607011	1.39299	extracellular	K14739	MT1_2; metallothionein 1/2	map04212 Longevity regulating pathway - worm; map04978 Mineral absorption	GO:0002237 response to molecule of bacterial origin; GO:0002376 immune system process; GO:0006873 cellular ion homeostasis; GO:0006875 cellular metal ion homeostasis; GO:0006878 cellular copper ion homeostasis; GO:0006950 response to stress; GO:0006952 defense response; GO:0006955 immune response; GO:0007154 cell communication; GO:0007165 signal transduction; GO:0007166 cell surface receptor sign…	GO:0005622 intracellular anatomical structure; GO:0005634 nucleus; GO:0005737 cytoplasm; GO:0005829 cytosol; GO:0043226 organelle; GO:0043227 membrane-bounded organelle; GO:0043229 intracellular organelle; GO:0043231 intracellular membrane-bounded organelle; GO:0048471 perinuclear region of cytoplasm;	GO:0005488 binding; GO:0008270 zinc ion binding; GO:0043167 ion binding; GO:0043169 cation binding; GO:0046872 metal ion binding; GO:0046914 transition metal ion binding;	PF00131	PF00131 Metallothionein	P	KOG4738	Predicted metallothionein
Q05717	Insulin-like growth factor-binding protein 5 OS=Bos taurus OX=9913 GN=IGFBP5 PE=2 SV=2	IGFBP5	1.83525	Up	30.314	24384.7	44751.9	0.705406	1.29459	extracellular	K23577	IGFBP5; insulin-like growth factor-binding protein 5		GO:0000003 reproduction; GO:0001503 ossification; GO:0001558 regulation of cell growth; GO:0001649 osteoblast differentiation; GO:0001942 hair follicle development; GO:0002009 morphogenesis of an epithelium; GO:0005975 carbohydrate metabolic process; GO:0005996 monosaccharide metabolic process; GO:0006006 glucose metabolic process; GO:0006109 regulation of carbohydrate metabolic process; GO:00064…	GO:0005576 extracellular region; GO:0005615 extracellular space; GO:0005622 intracellular anatomical structure; GO:0005737 cytoplasm; GO:0005783 endoplasmic reticulum; GO:0005788 endoplasmic reticulum lumen; GO:0012505 endomembrane system; GO:0016942 insulin-like growth factor binding protein complex; GO:0031974 membrane-enclosed lumen; GO:0032991 protein-containing complex; GO:0036454 growth fac…	GO:0001968 fibronectin binding; GO:0005488 binding; GO:0005515 protein binding; GO:0005520 insulin-like growth factor binding; GO:0019838 growth factor binding; GO:0031994 insulin-like growth factor I binding; GO:0031995 insulin-like growth factor II binding;	PF00219; PF00086	PF00219 Insulin-like growth factor binding protein; PF00086 Thyroglobulin type-1 repeat
Q08DR0	PHD finger protein 6 OS=Bos taurus OX=9913 GN=PHF6 PE=2 SV=1	PHF6	0.517148	Down	41.2895	9761.44	5048.11	1.31826	0.681737	nucleus	K23310	PHF6; PHD finger protein 6		GO:0000122 negative regulation of transcription by RNA polymerase II; GO:0006355 regulation of transcription, DNA-templated; GO:0006357 regulation of transcription by RNA polymerase II; GO:0009889 regulation of biosynthetic process; GO:0009890 negative regulation of biosynthetic process; GO:0009892 negative regulation of metabolic process; GO:0010468 regulation of gene expression; GO:0010556 regu…	GO:0005622 intracellular anatomical structure; GO:0005634 nucleus; GO:0005654 nucleoplasm; GO:0005730 nucleolus; GO:0031974 membrane-enclosed lumen; GO:0031981 nuclear lumen; GO:0043226 organelle; GO:0043227 membrane-bounded organelle; GO:0043228 non-membrane-bounded organelle; GO:0043229 intracellular organelle; GO:0043231 intracellular membrane-bounded organelle; GO:0043232 intracellular non-me…	GO:0000981 DNA-binding transcription factor activity, RNA polymerase II-specific; GO:0001227 DNA-binding transcription repressor activity, RNA polymerase II-specific; GO:0003676 nucleic acid binding; GO:0003677 DNA binding; GO:0003700 DNA-binding transcription factor activity; GO:0005488 binding; GO:0005515 protein binding; GO:0008092 cytoskeletal protein binding; GO:0015631 tubulin binding; GO:0…	PF13771	PF13771 PHD-like zinc-binding domain	K	KOG1084	Transcription factor TCF20
Q0P570	Diphosphomevalonate decarboxylase OS=Bos taurus OX=9913 GN=MVD PE=2 SV=1	MVD	1.59352	Up	43.7319	18466.5	29426.8	0.771152	1.22885	extracellular	K01597	MVD, mvaD; diphosphomevalonate decarboxylase [EC:4.1.1.33]	map00900 Terpenoid backbone biosynthesis; map01100 Metabolic pathways	GO:0006066 alcohol metabolic process; GO:0006084 acetyl-CoA metabolic process; GO:0006139 nucleobase-containing compound metabolic process; GO:0006163 purine nucleotide metabolic process; GO:0006464 cellular protein modification process; GO:0006486 protein glycosylation; GO:0006487 protein N-linked glycosylation; GO:0006488 dolichol-linked oligosaccharide biosynthetic process; GO:0006489 dolichyl…	GO:0005622 intracellular anatomical structure; GO:0005737 cytoplasm; GO:0005777 peroxisome; GO:0005782 peroxisomal matrix; GO:0005829 cytosol; GO:0031907 microbody lumen; GO:0031974 membrane-enclosed lumen; GO:0042579 microbody; GO:0043226 organelle; GO:0043227 membrane-bounded organelle; GO:0043229 intracellular organelle; GO:0043231 intracellular membrane-bounded organelle; GO:0043233 organelle…	GO:0003824 catalytic activity; GO:0004163 diphosphomevalonate decarboxylase activity; GO:0005488 binding; GO:0005515 protein binding; GO:0016829 lyase activity; GO:0016830 carbon-carbon lyase activity; GO:0016831 carboxy-lyase activity; GO:0030544 Hsp70 protein binding; GO:0031072 heat shock protein binding; GO:0042802 identical protein binding; GO:0042803 protein homodimerization activity; GO:00…	PF18376	PF18376 Mevalonate 5-diphosphate decarboxylase C-terminal domain	I	KOG2833	Mevalonate pyrophosphate decarboxylase
Q0VD18	Phospholysine phosphohistidine inorganic pyrophosphate phosphatase OS=Bos taurus OX=9913 GN=LHPP PE=1 SV=1	LHPP	0.273927	Down	29.1803	88985.7	24375.6	1.56995	0.430051	cytoplasm	K11725	LHPP; phospholysine phosphohistidine inorganic pyrophosphate phosphatase [EC:3.6.1.1 3.1.3.-]	map00190 Oxidative phosphorylation	GO:0006139 nucleobase-containing compound metabolic process; GO:0006464 cellular protein modification process; GO:0006470 protein dephosphorylation; GO:0006725 cellular aromatic compound metabolic process; GO:0006753 nucleoside phosphate metabolic process; GO:0006793 phosphorus metabolic process; GO:0006796 phosphate-containing compound metabolic process; GO:0006807 nitrogen compound metabolic pr…	GO:0005622 intracellular anatomical structure; GO:0005634 nucleus; GO:0005654 nucleoplasm; GO:0005737 cytoplasm; GO:0005829 cytosol; GO:0016604 nuclear body; GO:0016607 nuclear speck; GO:0031974 membrane-enclosed lumen; GO:0031981 nuclear lumen; GO:0043226 organelle; GO:0043227 membrane-bounded organelle; GO:0043229 intracellular organelle; GO:0043231 intracellular membrane-bounded organelle; GO:…	GO:0000287 magnesium ion binding; GO:0003824 catalytic activity; GO:0004427 inorganic diphosphatase activity; GO:0004721 phosphoprotein phosphatase activity; GO:0005488 binding; GO:0005515 protein binding; GO:0016462 pyrophosphatase activity; GO:0016787 hydrolase activity; GO:0016788 hydrolase activity, acting on ester bonds; GO:0016791 phosphatase activity; GO:0016817 hydrolase activity, acting …	PF13344; PF13242	PF13344 Haloacid dehalogenase-like hydrolase; PF13242 HAD-hyrolase-like	R	KOG3040	Predicted sugar phosphatase (HAD superfamily)
Q29RS5	Retinoic acid receptor responder protein 2 OS=Bos taurus OX=9913 GN=RARRES2 PE=2 SV=1	RARRES2	2.03287	Up	18.3572	15061	30617	0.659442	1.34056	extracellular	K10044	RARRES2; retinoic acid receptor responder protein 2		GO:0001523 retinoid metabolic process; GO:0001701 in utero embryonic development; GO:0001932 regulation of protein phosphorylation; GO:0001934 positive regulation of protein phosphorylation; GO:0002376 immune system process; GO:0002576 platelet degranulation; GO:0002682 regulation of immune system process; GO:0002684 positive regulation of immune system process; GO:0002685 regulation of leukocyte…	GO:0005576 extracellular region; GO:0005615 extracellular space; GO:0005622 intracellular anatomical structure; GO:0005737 cytoplasm; GO:0012505 endomembrane system; GO:0030141 secretory granule; GO:0031012 extracellular matrix; GO:0031089 platelet dense granule lumen; GO:0031410 cytoplasmic vesicle; GO:0031974 membrane-enclosed lumen; GO:0031982 vesicle; GO:0031983 vesicle lumen; GO:0034774 secr…	GO:0005102 signaling receptor binding; GO:0005488 binding; GO:0005515 protein binding;
Q2HJC9	Polyglutamine-binding protein 1 OS=Bos taurus OX=9913 GN=PQBP1 PE=2 SV=1	PQBP1	0.371588	Down	30.3461	63586.2	23627.9	1.45816	0.541836	nucleus	K12865	PQBP1, NPW38; polyglutamine-binding protein 1	map03040 Spliceosome	GO:0000375 RNA splicing, via transesterification reactions; GO:0000377 RNA splicing, via transesterification reactions with bulged adenosine as nucleophile; GO:0000380 alternative mRNA splicing, via spliceosome; GO:0000398 mRNA splicing, via spliceosome; GO:0001654 eye development; GO:0001745 compound eye morphogenesis; GO:0001751 compound eye photoreceptor cell differentiation; GO:0001754 eye ph…	GO:0005622 intracellular anatomical structure; GO:0005634 nucleus; GO:0005654 nucleoplasm; GO:0005737 cytoplasm; GO:0005783 endoplasmic reticulum; GO:0005791 rough endoplasmic reticulum; GO:0005813 centrosome; GO:0005815 microtubule organizing center; GO:0005829 cytosol; GO:0005856 cytoskeleton; GO:0005929 cilium; GO:0010494 cytoplasmic stress granule; GO:0012505 endomembrane system; GO:0015630 m…	GO:0003676 nucleic acid binding; GO:0003677 DNA binding; GO:0003690 double-stranded DNA binding; GO:0003712 transcription coregulator activity; GO:0003713 transcription coactivator activity; GO:0005488 binding; GO:0005515 protein binding; GO:0008022 protein C-terminus binding; GO:0043021 ribonucleoprotein complex binding; GO:0044877 protein-containing complex binding; GO:0097159 organic cyclic co…			K	KOG3427	Polyglutamine tract-binding protein PQBP-1
Q2PC20	Protein phosphatase 1K, mitochondrial OS=Bos taurus OX=9913 GN=PPM1K PE=2 SV=1	PPM1K	0.635696	Down	41.1506	43065.5	27376.6	1.22272	0.777279	mitochondria	K17505	PPM1K, PP2CM; protein phosphatase 1K [EC:3.1.3.16]							T	KOG0698	Serine/threonine protein phosphatase
Q3T0J1	F-box only protein 4 OS=Bos taurus OX=9913 GN=FBXO4 PE=2 SV=1	FBXO4	0.371388	Down	43.9648	9903.63	3678.1	1.45838	0.541624	cytoplasm,nucleus	K10291	FBXO4; F-box protein 4	map04120 Ubiquitin mediated proteolysis	GO:0000209 protein polyubiquitination; GO:0000723 telomere maintenance; GO:0006139 nucleobase-containing compound metabolic process; GO:0006259 DNA metabolic process; GO:0006464 cellular protein modification process; GO:0006508 proteolysis; GO:0006511 ubiquitin-dependent protein catabolic process; GO:0006725 cellular aromatic compound metabolic process; GO:0006807 nitrogen compound metabolic proc…	GO:0000151 ubiquitin ligase complex; GO:0005622 intracellular anatomical structure; GO:0005737 cytoplasm; GO:0005829 cytosol; GO:0019005 SCF ubiquitin ligase complex; GO:0031461 cullin-RING ubiquitin ligase complex; GO:0032991 protein-containing complex; GO:1902494 catalytic complex; GO:1990234 transferase complex;	GO:0003824 catalytic activity; GO:0004842 ubiquitin-protein transferase activity; GO:0005488 binding; GO:0005515 protein binding; GO:0016740 transferase activity; GO:0019787 ubiquitin-like protein transferase activity; GO:0042802 identical protein binding; GO:0042803 protein homodimerization activity; GO:0046983 protein dimerization activity; GO:0061630 ubiquitin protein ligase activity; GO:00616…	PF12937	PF12937 F-box-like
Q3ZBS7	Vitronectin OS=Bos taurus OX=9913 GN=VTN PE=1 SV=1	VTN	0.625296	Down	53.5751	53054.9	33175	1.23055	0.769455	extracellular	K06251	VTN; vitronectin	map04151 PI3K-Akt signaling pathway; map04510 Focal adhesion; map04512 ECM-receptor interaction; map04610 Complement and coagulation cascades	GO:0001704 formation of primary germ layer; GO:0001706 endoderm formation; GO:0001889 liver development; GO:0001932 regulation of protein phosphorylation; GO:0001934 positive regulation of protein phosphorylation; GO:0002376 immune system process; GO:0002673 regulation of acute inflammatory response; GO:0002682 regulation of immune system process; GO:0002697 regulation of immune effector process;…	GO:0005576 extracellular region; GO:0005604 basement membrane; GO:0005615 extracellular space; GO:0005622 intracellular anatomical structure; GO:0005737 cytoplasm; GO:0005783 endoplasmic reticulum; GO:0005788 endoplasmic reticulum lumen; GO:0005791 rough endoplasmic reticulum; GO:0005794 Golgi apparatus; GO:0005796 Golgi lumen; GO:0005886 plasma membrane; GO:0012505 endomembrane system; GO:001602…	GO:0005102 signaling receptor binding; GO:0005178 integrin binding; GO:0005488 binding; GO:0005515 protein binding; GO:0005518 collagen binding; GO:0005539 glycosaminoglycan binding; GO:0008201 heparin binding; GO:0042802 identical protein binding; GO:0043167 ion binding; GO:0043168 anion binding; GO:0044877 protein-containing complex binding; GO:0050839 cell adhesion molecule binding; GO:0050840…			OW	KOG1565	Gelatinase A and related matrix metalloproteases
Q3ZBW5	Rho-related GTP-binding protein RhoB OS=Bos taurus OX=9913 GN=RHOB PE=2 SV=1	RHOB	0.663268	Down	22.1234	48657.8	32273.2	1.20245	0.797548	cytoplasm	K07856	RHOB; Ras homolog gene family, member B		GO:0000278 mitotic cell cycle; GO:0000281 mitotic cytokinesis; GO:0000302 response to reactive oxygen species; GO:0000910 cytokinesis; GO:0002009 morphogenesis of an epithelium; GO:0003158 endothelium development; GO:0003159 morphogenesis of an endothelium; GO:0006810 transport; GO:0006886 intracellular protein transport; GO:0006915 apoptotic process; GO:0006950 response to stress; GO:0006979 res…	GO:0005622 intracellular anatomical structure; GO:0005634 nucleus; GO:0005737 cytoplasm; GO:0005768 endosome; GO:0005769 early endosome; GO:0005770 late endosome; GO:0005829 cytosol; GO:0005886 plasma membrane; GO:0010008 endosome membrane; GO:0012505 endomembrane system; GO:0016020 membrane; GO:0031090 organelle membrane; GO:0031410 cytoplasmic vesicle; GO:0031902 late endosome membrane; GO:0031…	GO:0000166 nucleotide binding; GO:0001882 nucleoside binding; GO:0001883 purine nucleoside binding; GO:0003824 catalytic activity; GO:0003924 GTPase activity; GO:0005488 binding; GO:0005525 GTP binding; GO:0016462 pyrophosphatase activity; GO:0016787 hydrolase activity; GO:0016817 hydrolase activity, acting on acid anhydrides; GO:0016818 hydrolase activity, acting on acid anhydrides, in phosphoru…	PF00071	PF00071 Ras family	R	KOG0393	Ras-related small GTPase, Rho type
Q3ZCG2	Mitochondrial pyruvate carrier 1 OS=Bos taurus OX=9913 GN=MPC1 PE=1 SV=1	MPC1	1.54933	Up	12.3885	7273.25	11268.6	0.78452	1.21548	cytoplasm	K22138	MPC1; mitochondrial pyruvate carrier 1		GO:0006082 organic acid metabolic process; GO:0006084 acetyl-CoA metabolic process; GO:0006085 acetyl-CoA biosynthetic process; GO:0006086 acetyl-CoA biosynthetic process from pyruvate; GO:0006090 pyruvate metabolic process; GO:0006139 nucleobase-containing compound metabolic process; GO:0006163 purine nucleotide metabolic process; GO:0006164 purine nucleotide biosynthetic process; GO:0006637 acy…	GO:0005622 intracellular anatomical structure; GO:0005737 cytoplasm; GO:0005739 mitochondrion; GO:0005740 mitochondrial envelope; GO:0005743 mitochondrial inner membrane; GO:0016020 membrane; GO:0016021 integral component of membrane; GO:0019866 organelle inner membrane; GO:0031090 organelle membrane; GO:0031224 intrinsic component of membrane; GO:0031300 intrinsic component of organelle membrane…	GO:0005215 transporter activity; GO:0005342 organic acid transmembrane transporter activity; GO:0008028 monocarboxylic acid transmembrane transporter activity; GO:0008509 anion transmembrane transporter activity; GO:0008514 organic anion transmembrane transporter activity; GO:0015075 ion transmembrane transporter activity; GO:0015318 inorganic molecular entity transmembrane transporter activity; …			S	KOG1590	Uncharacterized conserved protein
Q5EA53	General transcription factor IIF subunit 1 OS=Bos taurus OX=9913 GN=GTF2F1 PE=2 SV=1	GTF2F1	1.59428	Up	58.2623	6590.59	10507.2	0.770926	1.22907	nucleus	K03138	TFIIF1, GTF2F1, TFG1; transcription initiation factor TFIIF subunit alpha	map03022 Basal transcription factors	GO:0000375 RNA splicing, via transesterification reactions; GO:0000377 RNA splicing, via transesterification reactions with bulged adenosine as nucleophile; GO:0000398 mRNA splicing, via spliceosome; GO:0006139 nucleobase-containing compound metabolic process; GO:0006351 transcription, DNA-templated; GO:0006352 DNA-templated transcription, initiation; GO:0006354 DNA-templated transcription, elong…	GO:0000428 DNA-directed RNA polymerase complex; GO:0005622 intracellular anatomical structure; GO:0005634 nucleus; GO:0005654 nucleoplasm; GO:0005667 transcription regulator complex; GO:0005669 transcription factor TFIID complex; GO:0005674 transcription factor TFIIF complex; GO:0016591 RNA polymerase II, holoenzyme; GO:0030054 cell junction; GO:0030880 RNA polymerase complex; GO:0031974 membrane…	GO:0001091 RNA polymerase II general transcription initiation factor binding; GO:0001096 TFIIF-class transcription factor complex binding; GO:0001098 basal transcription machinery binding; GO:0001099 basal RNA polymerase II transcription machinery binding; GO:0003682 chromatin binding; GO:0003712 transcription coregulator activity; GO:0003713 transcription coactivator activity; GO:0005488 binding…			K	KOG2393	Transcription initiation factor IIF, large subunit (RAP74)
Q7SIH1	Alpha-2-macroglobulin OS=Bos taurus OX=9913 GN=A2M PE=1 SV=2	A2M	1.53619	Up	167.576	33588.1	51597.9	0.788583	1.21142	extracellular	K03910	A2M; alpha-2-macroglobulin	map04610 Complement and coagulation cascades	GO:0000003 reproduction; GO:0001101 response to acid chemical; GO:0001553 luteinization; GO:0001868 regulation of complement activation, lectin pathway; GO:0001869 negative regulation of complement activation, lectin pathway; GO:0002376 immune system process; GO:0002437 inflammatory response to antigenic stimulus; GO:0002438 acute inflammatory response to antigenic stimulus; GO:0002526 acute infl…	GO:0005576 extracellular region; GO:0005615 extracellular space; GO:0005622 intracellular anatomical structure; GO:0005737 cytoplasm; GO:0005829 cytosol; GO:0012505 endomembrane system; GO:0030141 secretory granule; GO:0031091 platelet alpha granule; GO:0031093 platelet alpha granule lumen; GO:0031410 cytoplasmic vesicle; GO:0031974 membrane-enclosed lumen; GO:0031982 vesicle; GO:0031983 vesicle …	GO:0002020 protease binding; GO:0004857 enzyme inhibitor activity; GO:0004866 endopeptidase inhibitor activity; GO:0004867 serine-type endopeptidase inhibitor activity; GO:0005096 GTPase activator activity; GO:0005102 signaling receptor binding; GO:0005488 binding; GO:0005515 protein binding; GO:0008047 enzyme activator activity; GO:0019838 growth factor binding; GO:0019899 enzyme binding; GO:001…	PF01835; PF17791; PF17789; PF07703; PF07677	PF01835 MG2 domain; PF17791 Macroglobulin domain MG3; PF17789 Macroglobulin domain MG4; PF07703 Alpha-2-macroglobulin bait region domain; PF07677 A-macroglobulin receptor binding domain	O	KOG1366	Alpha-macroglobulin
A0A3Q1LHF6	RPTOR independent companion of MTOR complex 2 OS=Bos taurus OX=9913 GN=RICTOR PE=3 SV=1	RICTOR	0.613972	Down	197.978	19322.4	11863.4	1.23918	0.760821	nucleus	K08267	RICTOR; rapamycin-insensitive companion of mTOR	map04150 mTOR signaling pathway	GO:0000902 cell morphogenesis; GO:0000904 cell morphogenesis involved in differentiation; GO:0001932 regulation of protein phosphorylation; GO:0001934 positive regulation of protein phosphorylation; GO:0001936 regulation of endothelial cell proliferation; GO:0001938 positive regulation of endothelial cell proliferation; GO:0006355 regulation of transcription, DNA-templated; GO:0006464 cellular pr…	GO:0005622 intracellular anatomical structure; GO:0005737 cytoplasm; GO:0005829 cytosol; GO:0031932 TORC2 complex; GO:0032991 protein-containing complex; GO:0038201 TOR complex;	GO:0005488 binding; GO:0005515 protein binding; GO:0008047 enzyme activator activity; GO:0019899 enzyme binding; GO:0019900 kinase binding; GO:0019901 protein kinase binding; GO:0030234 enzyme regulator activity; GO:0043021 ribonucleoprotein complex binding; GO:0043022 ribosome binding; GO:0044877 protein-containing complex binding; GO:0098772 molecular function regulator;	PF14664; PF14666; PF14663; PF14668; PF14665	PF14664 Rapamycin-insensitive companion of mTOR, N-term; PF14666 Rapamycin-insensitive companion of mTOR, middle domain; PF14663 Rapamycin-insensitive companion of mTOR RasGEF_N domain; PF14668 Rapamycin-insensitive companion of mTOR, domain 5; PF14665 Rapamycin-insensitive companion of mTOR, phosphorylation-site	D	KOG3694	Protein required for meiosis
A0A3Q1LJZ4	FAT atypical cadherin 1 OS=Bos taurus OX=9913 GN=FAT1 PE=4 SV=1	FAT1	0.661399	Down	511.835	29624.1	19593.3	1.2038	0.796195	plasma membrane	K16506	FAT1_2_3; protocadherin Fat 1/2/3		GO:0000003 reproduction; GO:0000902 cell morphogenesis; GO:0000904 cell morphogenesis involved in differentiation; GO:0001667 ameboidal-type cell migration; GO:0001736 establishment of planar polarity; GO:0001738 morphogenesis of a polarized epithelium; GO:0002009 morphogenesis of an epithelium; GO:0002064 epithelial cell development; GO:0002065 columnar/cuboidal epithelial cell differentiation; …	GO:0005622 intracellular anatomical structure; GO:0005634 nucleus; GO:0005737 cytoplasm; GO:0005886 plasma membrane; GO:0005887 integral component of plasma membrane; GO:0005911 cell-cell junction; GO:0005912 adherens junction; GO:0005925 focal adhesion; GO:0009925 basal plasma membrane; GO:0016020 membrane; GO:0016021 integral component of membrane; GO:0016323 basolateral plasma membrane; GO:003…	GO:0005488 binding; GO:0005509 calcium ion binding; GO:0005515 protein binding; GO:0043167 ion binding; GO:0043169 cation binding; GO:0044877 protein-containing complex binding; GO:0046872 metal ion binding; GO:0050839 cell adhesion molecule binding;	PF00028; PF02210; PF00008; PF07645	PF00028 Cadherin domain; PF02210 Laminin G domain; PF00008 EGF-like domain; PF07645 Calcium-binding EGF domain	S	KOG3594	FOG: Cadherin repeats
A0A3Q1LPH8	TAO kinase 3 OS=Bos taurus OX=9913 GN=TAOK3 PE=4 SV=1	TAOK3	0.606429	Down	105.44	10932.6	6629.85	1.245	0.755002	cytoplasm	K04429	TAO; thousand and one amino acid protein kinase [EC:2.7.11.1]	map04010 MAPK signaling pathway	GO:0000075 cell cycle checkpoint signaling; GO:0000077 DNA damage checkpoint signaling; GO:0000165 MAPK cascade; GO:0000278 mitotic cell cycle; GO:0001932 regulation of protein phosphorylation; GO:0001933 negative regulation of protein phosphorylation; GO:0001934 positive regulation of protein phosphorylation; GO:0006464 cellular protein modification process; GO:0006468 protein phosphorylation; G…	GO:0005622 intracellular anatomical structure; GO:0005737 cytoplasm;	GO:0003824 catalytic activity; GO:0004672 protein kinase activity; GO:0004674 protein serine/threonine kinase activity; GO:0004709 MAP kinase kinase kinase activity; GO:0004857 enzyme inhibitor activity; GO:0004860 protein kinase inhibitor activity; GO:0016301 kinase activity; GO:0016740 transferase activity; GO:0016772 transferase activity, transferring phosphorus-containing groups; GO:0016773 p…	PF00069	PF00069 Protein kinase domain	T	KOG0577	Serine/threonine protein kinase
A0A3Q1LT07	Glutamyl-tRNA(Gln) amidotransferase subunit C, mitochondrial OS=Bos taurus OX=9913 GN=GATC PE=3 SV=1	GATC	0.516727	Down	20.3407	55359.5	28605.7	1.31863	0.681371	extracellular	K02435	gatC, GATC; aspartyl-tRNA(Asn)/glutamyl-tRNA(Gln) amidotransferase subunit C [EC:6.3.5.6 6.3.5.7]	map00970 Aminoacyl-tRNA biosynthesis; map01100 Metabolic pathways	GO:0006082 organic acid metabolic process; GO:0006139 nucleobase-containing compound metabolic process; GO:0006399 tRNA metabolic process; GO:0006412 translation; GO:0006518 peptide metabolic process; GO:0006520 cellular amino acid metabolic process; GO:0006725 cellular aromatic compound metabolic process; GO:0006807 nitrogen compound metabolic process; GO:0008152 metabolic process; GO:0009058 bi…	GO:0005622 intracellular anatomical structure; GO:0005737 cytoplasm; GO:0005739 mitochondrion; GO:0030956 glutamyl-tRNA(Gln) amidotransferase complex; GO:0032991 protein-containing complex; GO:0043226 organelle; GO:0043227 membrane-bounded organelle; GO:0043229 intracellular organelle; GO:0043231 intracellular membrane-bounded organelle;	GO:0003824 catalytic activity; GO:0016874 ligase activity; GO:0016879 ligase activity, forming carbon-nitrogen bonds; GO:0016884 carbon-nitrogen ligase activity, with glutamine as amido-N-donor; GO:0050567 glutaminyl-tRNA synthase (glutamine-hydrolyzing) activity; GO:0140098 catalytic activity, acting on RNA; GO:0140101 catalytic activity, acting on a tRNA;			L	KOG4247	Mitochondrial DNA polymerase accessory subunit
A0A3Q1LTK5	Ribosomal protein S6 kinase OS=Bos taurus OX=9913 GN=RPS6KB2 PE=3 SV=1	RPS6KB2	1.62035	Up	52.2569	26693.1	43252.2	0.763257	1.23674	cytoplasm	K04688	RPS6KB; ribosomal protein S6 kinase beta [EC:2.7.11.1]	map04012 ErbB signaling pathway; map04066 HIF-1 signaling pathway; map04140 Autophagy - animal; map04150 mTOR signaling pathway; map04151 PI3K-Akt signaling pathway; map04152 AMPK signaling pathway; map04211 Longevity regulating pathway; map04212 Longevity regulating pathway - worm; map04213 Longevity regulating pathway - multiple species; map04350 TGF-beta signaling pathway; map04361 Axon regene…	GO:0000003 reproduction; GO:0000768 syncytium formation by plasma membrane fusion; GO:0000902 cell morphogenesis; GO:0000904 cell morphogenesis involved in differentiation; GO:0001558 regulation of cell growth; GO:0002119 nematode larval development; GO:0002164 larval development; GO:0003006 developmental process involved in reproduction; GO:0006412 translation; GO:0006417 regulation of translati…	GO:0005622 intracellular anatomical structure; GO:0005634 nucleus; GO:0005654 nucleoplasm; GO:0005737 cytoplasm; GO:0005739 mitochondrion; GO:0031974 membrane-enclosed lumen; GO:0031981 nuclear lumen; GO:0043226 organelle; GO:0043227 membrane-bounded organelle; GO:0043229 intracellular organelle; GO:0043231 intracellular membrane-bounded organelle; GO:0043233 organelle lumen; GO:0045202 synapse; …	GO:0000166 nucleotide binding; GO:0003824 catalytic activity; GO:0004672 protein kinase activity; GO:0004674 protein serine/threonine kinase activity; GO:0004711 ribosomal protein S6 kinase activity; GO:0005488 binding; GO:0005515 protein binding; GO:0005524 ATP binding; GO:0016301 kinase activity; GO:0016740 transferase activity; GO:0016772 transferase activity, transferring phosphorus-containin…	PF00069	PF00069 Protein kinase domain	RT	KOG0598	Ribosomal protein S6 kinase and related proteins
A0A3Q1LXM5	Adhesion G-protein coupled receptor G1 OS=Bos taurus OX=9913 GN=ADGRG1 PE=4 SV=1	ADGRG1	0.41127	Down	76.9221	5986.19	2461.94	1.41716	0.582837	plasma membrane	K08450	ADGRG1, GPR56; adhesion G-protein coupled receptor G1		GO:0000003 reproduction; GO:0001525 angiogenesis; GO:0001568 blood vessel development; GO:0001816 cytokine production; GO:0001944 vasculature development; GO:0003002 regionalization; GO:0003006 developmental process involved in reproduction; GO:0006928 movement of cell or subcellular component; GO:0007154 cell communication; GO:0007155 cell adhesion; GO:0007165 signal transduction; GO:0007186 G p…	GO:0005886 plasma membrane; GO:0005887 integral component of plasma membrane; GO:0016020 membrane; GO:0016021 integral component of membrane; GO:0031224 intrinsic component of membrane; GO:0031226 intrinsic component of plasma membrane; GO:0042995 cell projection; GO:0071944 cell periphery; GO:0097386 glial cell projection; GO:0097449 astrocyte projection; GO:0097450 astrocyte end-foot; GO:009745…	GO:0004888 transmembrane signaling receptor activity; GO:0004930 G protein-coupled receptor activity; GO:0005488 binding; GO:0005518 collagen binding; GO:0005539 glycosaminoglycan binding; GO:0008201 heparin binding; GO:0038023 signaling receptor activity; GO:0043167 ion binding; GO:0043168 anion binding; GO:0044877 protein-containing complex binding; GO:0050840 extracellular matrix binding; GO:0…	PF18587; PF18619	PF18587 PTX/LNS-Like (PLL) domain; PF18619 GPCR-Autoproteolysis-INducing (GAIN) subdomain A	T	KOG4193	G protein-coupled receptors
A0A3Q1M1X5	Lipase OS=Bos taurus OX=9913 GN=LIPA PE=3 SV=1	LIPA	1.65128	Up	45.7978	29761.8	49144.9	0.754353	1.24565	extracellular	K01052	LIPA; lysosomal acid lipase/cholesteryl ester hydrolase [EC:3.1.1.13]	map00100 Steroid biosynthesis; map04142 Lysosome; map04979 Cholesterol metabolism	GO:0000902 cell morphogenesis; GO:0001816 cytokine production; GO:0001894 tissue homeostasis; GO:0006082 organic acid metabolic process; GO:0006629 lipid metabolic process; GO:0006631 fatty acid metabolic process; GO:0006950 response to stress; GO:0006952 defense response; GO:0006954 inflammatory response; GO:0007275 multicellular organism development; GO:0008152 metabolic process; GO:0008202 ste…	GO:0000323 lytic vacuole; GO:0001650 fibrillar center; GO:0005576 extracellular region; GO:0005615 extracellular space; GO:0005622 intracellular anatomical structure; GO:0005634 nucleus; GO:0005730 nucleolus; GO:0005737 cytoplasm; GO:0005764 lysosome; GO:0005773 vacuole; GO:0005775 vacuolar lumen; GO:0031410 cytoplasmic vesicle; GO:0031974 membrane-enclosed lumen; GO:0031981 nuclear lumen; GO:003…	GO:0003824 catalytic activity; GO:0004771 sterol esterase activity; GO:0016298 lipase activity; GO:0016787 hydrolase activity; GO:0016788 hydrolase activity, acting on ester bonds; GO:0052689 carboxylic ester hydrolase activity;	PF00561	PF00561 alpha/beta hydrolase fold	I	KOG2624	Triglyceride lipase-cholesterol esterase
A0A3Q1M365	SPG11 vesicle trafficking associated, spatacsin OS=Bos taurus OX=9913 GN=SPG11 PE=4 SV=1	SPG11	1.51697	Up	279.41	7515.74	11401.2	0.794605	1.20539	plasma membrane	K19026	SPG11; spatacsin		GO:0000902 cell morphogenesis; GO:0000904 cell morphogenesis involved in differentiation; GO:0001845 phagolysosome assembly; GO:0006810 transport; GO:0006897 endocytosis; GO:0006906 vesicle fusion; GO:0006909 phagocytosis; GO:0006928 movement of cell or subcellular component; GO:0006996 organelle organization; GO:0007017 microtubule-based process; GO:0007018 microtubule-based movement; GO:0007033…	GO:0005622 intracellular anatomical structure; GO:0005634 nucleus; GO:0005730 nucleolus; GO:0005737 cytoplasm; GO:0005829 cytosol; GO:0005886 plasma membrane; GO:0016020 membrane; GO:0030424 axon; GO:0030425 dendrite; GO:0031410 cytoplasmic vesicle; GO:0031974 membrane-enclosed lumen; GO:0031981 nuclear lumen; GO:0031982 vesicle; GO:0036477 somatodendritic compartment; GO:0042995 cell projection;…				S	KOG1884	Uncharacterized conserved protein
A0A3Q1M3W5	Ubiquinone biosynthesis monooxygenase COQ6, mitochondrial OS=Bos taurus OX=9913 GN=COQ6 PE=3 SV=1	COQ6	0.538093	Down	52.7392	9752.54	5247.77	1.30031	0.699688	mitochondria	K06126	COQ6; ubiquinone biosynthesis monooxygenase Coq6 [EC:1.14.13.-]	map00130 Ubiquinone and other terpenoid-quinone biosynthesis; map01100 Metabolic pathways; map01240 Biosynthesis of cofactors	GO:0006743 ubiquinone metabolic process; GO:0006744 ubiquinone biosynthetic process; GO:0008152 metabolic process; GO:0009058 biosynthetic process; GO:0009987 cellular process; GO:0042180 cellular ketone metabolic process; GO:0042181 ketone biosynthetic process; GO:0044237 cellular metabolic process; GO:0044249 cellular biosynthetic process; GO:0044281 small molecule metabolic process; GO:0044283…	GO:0005622 intracellular anatomical structure; GO:0005737 cytoplasm; GO:0005739 mitochondrion; GO:0043226 organelle; GO:0043227 membrane-bounded organelle; GO:0043229 intracellular organelle; GO:0043231 intracellular membrane-bounded organelle;				HC	KOG3855	Monooxygenase involved in coenzyme Q (ubiquinone) biosynthesis
A0A3Q1M7E0	24-dehydrocholesterol reductase OS=Bos taurus OX=9913 GN=DHCR24 PE=4 SV=1	DHCR24	1.72054	Up	63.8186	50618	87090.1	0.735149	1.26485	endoplasmic reticulum	K09828	DHCR24, DWF1; Delta24-sterol reductase [EC:1.3.1.72 1.3.1.-]	map00100 Steroid biosynthesis; map01100 Metabolic pathways	GO:0000003 reproduction; GO:0003006 developmental process involved in reproduction; GO:0006066 alcohol metabolic process; GO:0006508 proteolysis; GO:0006629 lipid metabolic process; GO:0006694 steroid biosynthetic process; GO:0006695 cholesterol biosynthetic process; GO:0006807 nitrogen compound metabolic process; GO:0006915 apoptotic process; GO:0006950 response to stress; GO:0006979 response to…	GO:0000139 Golgi membrane; GO:0005622 intracellular anatomical structure; GO:0005634 nucleus; GO:0005737 cytoplasm; GO:0005783 endoplasmic reticulum; GO:0005789 endoplasmic reticulum membrane; GO:0005794 Golgi apparatus; GO:0005829 cytosol; GO:0005856 cytoskeleton; GO:0012505 endomembrane system; GO:0016020 membrane; GO:0031090 organelle membrane; GO:0031984 organelle subcompartment; GO:0042175 n…	GO:0000246 delta24(24-1) sterol reductase activity; GO:0003823 antigen binding; GO:0003824 catalytic activity; GO:0005488 binding; GO:0005515 protein binding; GO:0016491 oxidoreductase activity; GO:0016627 oxidoreductase activity, acting on the CH-CH group of donors; GO:0016628 oxidoreductase activity, acting on the CH-CH group of donors, NAD or NADP as acceptor; GO:0019899 enzyme binding; GO:003…	PF01565	PF01565 FAD binding domain	R	KOG1262	FAD-binding protein DIMINUTO
A0A3Q1MD51	Gasdermin D OS=Bos taurus OX=9913 GN=GSDMD PE=3 SV=1	GSDMD	0.53695	Down	58.4072	25930.5	13923.4	1.30128	0.698721	nucleus	K20917	GSDMD; gasdermin-D	map04613 Neutrophil extracellular trap formation; map04621 NOD-like receptor signaling pathway	GO:0001775 cell activation; GO:0001817 regulation of cytokine production; GO:0001819 positive regulation of cytokine production; GO:0002252 immune effector process; GO:0002263 cell activation involved in immune response; GO:0002274 myeloid leukocyte activation; GO:0002275 myeloid cell activation involved in immune response; GO:0002283 neutrophil activation involved in immune response; GO:0002366 …	GO:0005576 extracellular region; GO:0005615 extracellular space; GO:0005622 intracellular anatomical structure; GO:0005634 nucleus; GO:0005654 nucleoplasm; GO:0005737 cytoplasm; GO:0005829 cytosol; GO:0005886 plasma membrane; GO:0012505 endomembrane system; GO:0016020 membrane; GO:0030141 secretory granule; GO:0031410 cytoplasmic vesicle; GO:0031974 membrane-enclosed lumen; GO:0031981 nuclear lum…	GO:0001786 phosphatidylserine binding; GO:0005488 binding; GO:0005543 phospholipid binding; GO:0005546 phosphatidylinositol-4,5-bisphosphate binding; GO:0008289 lipid binding; GO:0035091 phosphatidylinositol binding; GO:0043167 ion binding; GO:0043168 anion binding; GO:0070273 phosphatidylinositol-4-phosphate binding; GO:0070300 phosphatidic acid binding; GO:0072341 modified amino acid binding; G…	PF04598; PF17708	PF04598 Gasdermin pore forming domain; PF17708 Gasdermin PUB domain
A0A3Q1MPB2	CCN family member 2 OS=Bos taurus OX=9913 GN=CCN2 PE=3 SV=1	CCN2	0.606744	Down	39.4785	109992	66736.8	1.24475	0.755247	nucleus	K06827	CTGF, CCN2, IGFBP8; connective tissue growth factor (insulin-like growth factor-binding protein 8)	map04371 Apelin signaling pathway; map04390 Hippo signaling pathway	GO:0001101 response to acid chemical; GO:0001501 skeletal system development; GO:0001502 cartilage condensation; GO:0001503 ossification; GO:0001525 angiogenesis; GO:0001568 blood vessel development; GO:0001894 tissue homeostasis; GO:0001932 regulation of protein phosphorylation; GO:0001934 positive regulation of protein phosphorylation; GO:0001944 vasculature development; GO:0006139 nucleobase-c…	GO:0005576 extracellular region; GO:0005615 extracellular space; GO:0005622 intracellular anatomical structure; GO:0005737 cytoplasm; GO:0005794 Golgi apparatus; GO:0005801 cis-Golgi network; GO:0005829 cytosol; GO:0005886 plasma membrane; GO:0005938 cell cortex; GO:0012505 endomembrane system; GO:0016020 membrane; GO:0031012 extracellular matrix; GO:0043226 organelle; GO:0043227 membrane-bounded…	GO:0001968 fibronectin binding; GO:0005102 signaling receptor binding; GO:0005178 integrin binding; GO:0005488 binding; GO:0005515 protein binding; GO:0005520 insulin-like growth factor binding; GO:0005539 glycosaminoglycan binding; GO:0008022 protein C-terminus binding; GO:0008083 growth factor activity; GO:0008201 heparin binding; GO:0019838 growth factor binding; GO:0030545 signaling receptor …	PF00219; PF00093; PF19035; PF00007	PF00219 Insulin-like growth factor binding protein; PF00093 von Willebrand factor type C domain; PF19035 CCN3 Nov like TSP1 domain; PF00007 Cystine-knot domain
A0A3Q1MVZ0	ANTXR cell adhesion molecule 1 OS=Bos taurus OX=9913 GN=ANTXR1 PE=3 SV=1	ANTXR1	1.51278	Up	62.6519	15115.2	22865.9	0.795932	1.20407	plasma membrane	K20909	ANTXR; anthrax toxin receptor	map04621 NOD-like receptor signaling pathway	GO:0000003 reproduction; GO:0000902 cell morphogenesis; GO:0000904 cell morphogenesis involved in differentiation; GO:0001568 blood vessel development; GO:0001944 vasculature development; GO:0006996 organelle organization; GO:0007010 cytoskeleton organization; GO:0007154 cell communication; GO:0007155 cell adhesion; GO:0007165 signal transduction; GO:0007275 multicellular organism development; GO…	GO:0005622 intracellular anatomical structure; GO:0005737 cytoplasm; GO:0005768 endosome; GO:0005886 plasma membrane; GO:0009897 external side of plasma membrane; GO:0009986 cell surface; GO:0010008 endosome membrane; GO:0012505 endomembrane system; GO:0016020 membrane; GO:0030027 lamellipodium; GO:0030175 filopodium; GO:0031090 organelle membrane; GO:0031252 cell leading edge; GO:0031253 cell pr…	GO:0003779 actin binding; GO:0004888 transmembrane signaling receptor activity; GO:0005488 binding; GO:0005515 protein binding; GO:0005518 collagen binding; GO:0008092 cytoskeletal protein binding; GO:0038023 signaling receptor activity; GO:0044877 protein-containing complex binding; GO:0051015 actin filament binding; GO:0060089 molecular transducer activity;	PF00092; PF05587	PF00092 von Willebrand factor type A domain; PF05587 Anthrax receptor extracellular domain
A0A3Q1MW87	Transcription factor JunD OS=Bos taurus OX=9913 GN=JUND PE=3 SV=1	JUND	1.66206	Up	35.322	7980.01	13263.2	0.751299	1.2487	nucleus	K04449	JUND; transcription factor jun-D	map04010 MAPK signaling pathway; map04380 Osteoclast differentiation; map04657 IL-17 signaling pathway; map04928 Parathyroid hormone synthesis, secretion and action	GO:0000122 negative regulation of transcription by RNA polymerase II; GO:0001503 ossification; GO:0001649 osteoblast differentiation; GO:0002076 osteoblast development; GO:0002237 response to molecule of bacterial origin; GO:0006139 nucleobase-containing compound metabolic process; GO:0006351 transcription, DNA-templated; GO:0006355 regulation of transcription, DNA-templated; GO:0006357 regulatio…	GO:0000228 nuclear chromosome; GO:0000785 chromatin; GO:0005622 intracellular anatomical structure; GO:0005634 nucleus; GO:0005654 nucleoplasm; GO:0005667 transcription regulator complex; GO:0005694 chromosome; GO:0031974 membrane-enclosed lumen; GO:0031981 nuclear lumen; GO:0032991 protein-containing complex; GO:0032993 protein-DNA complex; GO:0035976 transcription factor AP-1 complex; GO:004322…	GO:0000976 transcription cis-regulatory region binding; GO:0000977 RNA polymerase II transcription regulatory region sequence-specific DNA binding; GO:0000978 RNA polymerase II cis-regulatory region sequence-specific DNA binding; GO:0000981 DNA-binding transcription factor activity, RNA polymerase II-specific; GO:0000987 cis-regulatory region sequence-specific DNA binding; GO:0001067 transcriptio…			K	KOG0837	Transcriptional activator of the JUN family
A0A3Q1N357	PDZ and LIM domain protein 7 OS=Bos taurus OX=9913 GN=DBN1 PE=1 SV=1	DBN1	2.69256	Up	79.4198	2599.91	7000.41	0.541629	1.45837	mitochondria	K25391	DBN1; drebrin		GO:0000003 reproduction; GO:0001558 regulation of cell growth; GO:0001964 startle response; GO:0003008 system process; GO:0006937 regulation of muscle contraction; GO:0006996 organelle organization; GO:0007010 cytoskeleton organization; GO:0007015 actin filament organization; GO:0007154 cell communication; GO:0007275 multicellular organism development; GO:0007276 gamete generation; GO:0007283 spe…	GO:0005622 intracellular anatomical structure; GO:0005737 cytoplasm; GO:0005856 cytoskeleton; GO:0005886 plasma membrane; GO:0005911 cell-cell junction; GO:0005921 gap junction; GO:0005938 cell cortex; GO:0014069 postsynaptic density; GO:0015629 actin cytoskeleton; GO:0016020 membrane; GO:0030027 lamellipodium; GO:0030054 cell junction; GO:0030175 filopodium; GO:0030424 axon; GO:0030425 dendrite;…	GO:0003779 actin binding; GO:0005488 binding; GO:0005515 protein binding; GO:0005522 profilin binding; GO:0008092 cytoskeletal protein binding; GO:0044877 protein-containing complex binding; GO:0051015 actin filament binding;	PF00241	PF00241 Cofilin/tropomyosin-type actin-binding protein	Z	KOG3655	Drebrins and related actin binding proteins
A0A452DJI7	Forkhead box protein O1 OS=Bos taurus OX=9913 GN=FOXO1 PE=4 SV=1	FOXO1	2.58028	Up	64.5648	8736.98	22543.9	0.558615	1.44138	nucleus	K07201	FOXO1; forkhead box protein O1	map04068 FoxO signaling pathway; map04152 AMPK signaling pathway; map04211 Longevity regulating pathway; map04213 Longevity regulating pathway - multiple species; map04218 Cellular senescence; map04910 Insulin signaling pathway; map04919 Thyroid hormone signaling pathway; map04922 Glucagon signaling pathway	GO:0000122 negative regulation of transcription by RNA polymerase II; GO:0000302 response to reactive oxygen species; GO:0001101 response to acid chemical; GO:0001568 blood vessel development; GO:0001659 temperature homeostasis; GO:0001678 cellular glucose homeostasis; GO:0001932 regulation of protein phosphorylation; GO:0001933 negative regulation of protein phosphorylation; GO:0001944 vasculatu…	GO:0005622 intracellular anatomical structure; GO:0005634 nucleus; GO:0005654 nucleoplasm; GO:0005737 cytoplasm; GO:0005739 mitochondrion; GO:0005829 cytosol; GO:0031974 membrane-enclosed lumen; GO:0031981 nuclear lumen; GO:0043226 organelle; GO:0043227 membrane-bounded organelle; GO:0043229 intracellular organelle; GO:0043231 intracellular membrane-bounded organelle; GO:0043233 organelle lumen; …	GO:0000981 DNA-binding transcription factor activity, RNA polymerase II-specific; GO:0001221 transcription coregulator binding; GO:0001223 transcription coactivator binding; GO:0001227 DNA-binding transcription repressor activity, RNA polymerase II-specific; GO:0003676 nucleic acid binding; GO:0003677 DNA binding; GO:0003682 chromatin binding; GO:0003700 DNA-binding transcription factor activity;…	PF00250; PF16676	PF00250 Forkhead domain; PF16676 Transactivation domain of FOXO protein family	K	KOG2294	Transcription factor of the Forkhead/HNF3 family
A3KN01	Zinc finger protein 830 OS=Bos taurus OX=9913 GN=ZNF830 PE=2 SV=1	ZNF830	2.28131	Up	41.4922	4078.83	9305.07	0.609513	1.39049	nucleus	K13104	ZNF830, CCDC16; zinc finger protein 830		GO:0000003 reproduction; GO:0000075 cell cycle checkpoint signaling; GO:0000076 DNA replication checkpoint signaling; GO:0000077 DNA damage checkpoint signaling; GO:0000278 mitotic cell cycle; GO:0001541 ovarian follicle development; GO:0001546 preantral ovarian follicle growth; GO:0001701 in utero embryonic development; GO:0001824 blastocyst development; GO:0001832 blastocyst growth; GO:0001894 …	GO:0005622 intracellular anatomical structure; GO:0005634 nucleus; GO:0005654 nucleoplasm; GO:0016604 nuclear body; GO:0016607 nuclear speck; GO:0031974 membrane-enclosed lumen; GO:0031981 nuclear lumen; GO:0043226 organelle; GO:0043227 membrane-bounded organelle; GO:0043229 intracellular organelle; GO:0043231 intracellular membrane-bounded organelle; GO:0043233 organelle lumen; GO:0070013 intrac…		PF12874	PF12874 Zinc-finger of C2H2 type	S	KOG3032	Uncharacterized conserved protein
A5D7T5	Serine/threonine-protein phosphatase OS=Bos taurus OX=9913 GN=PPP3CC PE=2 SV=1	PPP3CC	4.5417	Up	58.1795	4105.2	18644.6	0.3609	1.6391	mitochondria	K04348	PPP3C, CNA; serine/threonine-protein phosphatase 2B catalytic subunit [EC:3.1.3.16]	map04010 MAPK signaling pathway; map04020 Calcium signaling pathway; map04022 cGMP-PKG signaling pathway; map04114 Oocyte meiosis; map04218 Cellular senescence; map04310 Wnt signaling pathway; map04360 Axon guidance; map04370 VEGF signaling pathway; map04380 Osteoclast differentiation; map04625 C-type lectin receptor signaling pathway; map04650 Natural killer cell mediated cytotoxicity; map04658 …	GO:0006464 cellular protein modification process; GO:0006470 protein dephosphorylation; GO:0006793 phosphorus metabolic process; GO:0006796 phosphate-containing compound metabolic process; GO:0006807 nitrogen compound metabolic process; GO:0007154 cell communication; GO:0007165 signal transduction; GO:0008152 metabolic process; GO:0009987 cellular process; GO:0016311 dephosphorylation; GO:0019538…	GO:0005622 intracellular anatomical structure; GO:0005737 cytoplasm; GO:0005829 cytosol;	GO:0003824 catalytic activity; GO:0004721 phosphoprotein phosphatase activity; GO:0004722 protein serine/threonine phosphatase activity; GO:0004723 calcium-dependent protein serine/threonine phosphatase activity; GO:0016787 hydrolase activity; GO:0016788 hydrolase activity, acting on ester bonds; GO:0016791 phosphatase activity; GO:0033192 calmodulin-dependent protein phosphatase activity; GO:004…	PF00149	PF00149 Calcineurin-like phosphoesterase	R	KOG0375	Serine-threonine phosphatase 2B, catalytic subunit
A6QL77	procollagen-proline 4-dioxygenase OS=Bos taurus OX=9913 GN=P4HA1 PE=2 SV=1	P4HA1	0.0458512	Down	60.9281	54274.3	2488.54	1.91232	0.0876821	endoplasmic reticulum	K00472	P4HA; prolyl 4-hydroxylase [EC:1.14.11.2]	map00330 Arginine and proline metabolism; map01100 Metabolic pathways	GO:0006082 organic acid metabolic process; GO:0006464 cellular protein modification process; GO:0006520 cellular amino acid metabolic process; GO:0006575 cellular modified amino acid metabolic process; GO:0006807 nitrogen compound metabolic process; GO:0007275 multicellular organism development; GO:0008152 metabolic process; GO:0009653 anatomical structure morphogenesis; GO:0009790 embryo develop…	GO:0005622 intracellular anatomical structure; GO:0005737 cytoplasm; GO:0005739 mitochondrion; GO:0005783 endoplasmic reticulum; GO:0005788 endoplasmic reticulum lumen; GO:0012505 endomembrane system; GO:0016222 procollagen-proline 4-dioxygenase complex; GO:0031974 membrane-enclosed lumen; GO:0032991 protein-containing complex; GO:0043226 organelle; GO:0043227 membrane-bounded organelle; GO:00432…	GO:0003824 catalytic activity; GO:0004656 procollagen-proline 4-dioxygenase activity; GO:0005488 binding; GO:0005515 protein binding; GO:0016491 oxidoreductase activity; GO:0016705 oxidoreductase activity, acting on paired donors, with incorporation or reduction of molecular oxygen; GO:0016706 2-oxoglutarate-dependent dioxygenase activity; GO:0019798 procollagen-proline dioxygenase activity; GO:0…			E	KOG1591	Prolyl 4-hydroxylase alpha subunit
A6QNX5	Keratin, type II cytoskeletal 78 OS=Bos taurus OX=9913 GN=KRT78 PE=2 SV=1	KRT78	0.608934	Down	57.4641	421683	256777	1.24306	0.756941	mitochondria	K07605	KRT2; type II keratin, basic		GO:0007275 multicellular organism development; GO:0008219 cell death; GO:0008544 epidermis development; GO:0009888 tissue development; GO:0009913 epidermal cell differentiation; GO:0009987 cellular process; GO:0012501 programmed cell death; GO:0030154 cell differentiation; GO:0030216 keratinocyte differentiation; GO:0030855 epithelial cell differentiation; GO:0031424 keratinization; GO:0032501 mu…	GO:0005622 intracellular anatomical structure; GO:0005737 cytoplasm; GO:0005829 cytosol;
A7YSY2	Ribosome biogenesis protein SPATA5L1 OS=Bos taurus OX=9913 GN=SPATA5L1 PE=2 SV=1	SPATA5L1	0.55308	Down	82.554	12354.4	6832.97	1.28776	0.712237	cytoplasm,nucleus							PF00004; PF17862	PF00004 ATPase family associated with various cellular activities (AAA); PF17862 AAA+ lid domain	O	KOG0730	AAA+-type ATPase
E1B725	Alpha-galactosidase OS=Bos taurus OX=9913 GN=GLA PE=3 SV=2	GLA	1.55184	Up	49.7952	13619	21134.6	0.783747	1.21625	extracellular	K01189	GLA; alpha-galactosidase [EC:3.2.1.22]	map00052 Galactose metabolism; map00561 Glycerolipid metabolism; map00600 Sphingolipid metabolism; map00603 Glycosphingolipid biosynthesis - globo and isoglobo series; map01100 Metabolic pathways; map04142 Lysosome	GO:0001505 regulation of neurotransmitter levels; GO:0001775 cell activation; GO:0002252 immune effector process; GO:0002263 cell activation involved in immune response; GO:0002274 myeloid leukocyte activation; GO:0002275 myeloid cell activation involved in immune response; GO:0002283 neutrophil activation involved in immune response; GO:0002366 leukocyte activation involved in immune response; G…	GO:0000323 lytic vacuole; GO:0005576 extracellular region; GO:0005615 extracellular space; GO:0005622 intracellular anatomical structure; GO:0005737 cytoplasm; GO:0005764 lysosome; GO:0005766 primary lysosome; GO:0005773 vacuole; GO:0005775 vacuolar lumen; GO:0005794 Golgi apparatus; GO:0012505 endomembrane system; GO:0030141 secretory granule; GO:0031410 cytoplasmic vesicle; GO:0031974 membrane-…	GO:0003824 catalytic activity; GO:0004553 hydrolase activity, hydrolyzing O-glycosyl compounds; GO:0004557 alpha-galactosidase activity; GO:0005102 signaling receptor binding; GO:0005488 binding; GO:0005515 protein binding; GO:0015925 galactosidase activity; GO:0016787 hydrolase activity; GO:0016798 hydrolase activity, acting on glycosyl bonds; GO:0016936 galactoside binding; GO:0042802 identical…	PF17450	PF17450 Alpha galactosidase A C-terminal beta sandwich domain	G	KOG2366	Alpha-D-galactosidase (melibiase)
E1BCZ0	DNA-directed RNA polymerase OS=Bos taurus OX=9913 GN=POLRMT PE=3 SV=3	POLRMT	0.339721	Down	138.102	28969.1	9841.43	1.49285	0.507152	nucleus	K10908	POLRMT, RPO41; DNA-directed RNA polymerase, mitochondrial [EC:2.7.7.6]		GO:0000959 mitochondrial RNA metabolic process; GO:0006139 nucleobase-containing compound metabolic process; GO:0006351 transcription, DNA-templated; GO:0006352 DNA-templated transcription, initiation; GO:0006390 mitochondrial transcription; GO:0006391 transcription initiation from mitochondrial promoter; GO:0006725 cellular aromatic compound metabolic process; GO:0006807 nitrogen compound metabo…	GO:0000428 DNA-directed RNA polymerase complex; GO:0005622 intracellular anatomical structure; GO:0005737 cytoplasm; GO:0005739 mitochondrion; GO:0005759 mitochondrial matrix; GO:0009295 nucleoid; GO:0030880 RNA polymerase complex; GO:0031974 membrane-enclosed lumen; GO:0032991 protein-containing complex; GO:0034245 mitochondrial DNA-directed RNA polymerase complex; GO:0042645 mitochondrial nucle…	GO:0003676 nucleic acid binding; GO:0003677 DNA binding; GO:0003824 catalytic activity; GO:0003899 DNA-directed 5'-3' RNA polymerase activity; GO:0005488 binding; GO:0016740 transferase activity; GO:0016772 transferase activity, transferring phosphorus-containing groups; GO:0016779 nucleotidyltransferase activity; GO:0034062 5'-3' RNA polymerase activity; GO:0043565 sequence-specific DNA binding;…	PF14700	PF14700 DNA-directed RNA polymerase N-terminal	KL	KOG1038	Mitochondrial/chloroplast DNA-directed RNA polymerase RPO41, provides primers for DNA replication-initiation
E1BEV7	Metalloendopeptidase OS=Bos taurus OX=9913 GN=BMP1 PE=4 SV=3	BMP1	1.61982	Up	111.77	5084.3	8235.66	0.763411	1.23659	extracellular	K05502	BMP1, TLD; bone morphogenetic protein 1 [EC:3.4.24.19]		GO:0000003 reproduction; GO:0000578 embryonic axis specification; GO:0000902 cell morphogenesis; GO:0000904 cell morphogenesis involved in differentiation; GO:0001501 skeletal system development; GO:0001502 cartilage condensation; GO:0001703 gastrulation with mouth forming first; GO:0002009 morphogenesis of an epithelium; GO:0002165 instar larval or pupal development; GO:0003002 regionalization; …	GO:0005576 extracellular region; GO:0031982 vesicle; GO:0043226 organelle; GO:0043227 membrane-bounded organelle;	GO:0003824 catalytic activity; GO:0004175 endopeptidase activity; GO:0004222 metalloendopeptidase activity; GO:0004252 serine-type endopeptidase activity; GO:0005488 binding; GO:0005515 protein binding; GO:0008233 peptidase activity; GO:0008236 serine-type peptidase activity; GO:0008237 metallopeptidase activity; GO:0016787 hydrolase activity; GO:0017171 serine hydrolase activity; GO:0042802 iden…	PF01400; PF00431; PF14670; PF07645	PF01400 Astacin (Peptidase family M12A); PF00431 CUB domain; PF14670 Coagulation Factor Xa inhibitory site; PF07645 Calcium-binding EGF domain	O	KOG3714	Meprin A metalloprotease
E1BFW9	ubiquitinyl hydrolase 1 OS=Bos taurus OX=9913 GN=OTUD5 PE=3 SV=1	OTUD5	2.0742	Up	60.3213	2304.18	4779.32	0.650576	1.34942	plasma membrane	K12655	OTUD5, DUBA; OTU domain-containing protein 5 [EC:3.4.19.12]	map04622 RIG-I-like receptor signaling pathway	GO:0000003 reproduction; GO:0001775 cell activation; GO:0001816 cytokine production; GO:0001817 regulation of cytokine production; GO:0001818 negative regulation of cytokine production; GO:0002237 response to molecule of bacterial origin; GO:0002250 adaptive immune response; GO:0002252 immune effector process; GO:0002263 cell activation involved in immune response; GO:0002285 lymphocyte activatio…	GO:0005622 intracellular anatomical structure; GO:0005737 cytoplasm; GO:0005829 cytosol;	GO:0003824 catalytic activity; GO:0004843 thiol-dependent deubiquitinase; GO:0008233 peptidase activity; GO:0008234 cysteine-type peptidase activity; GO:0016787 hydrolase activity; GO:0019783 ubiquitin-like protein-specific protease activity; GO:0061578 Lys63-specific deubiquitinase activity; GO:0101005 deubiquitinase activity; GO:0140096 catalytic activity, acting on a protein; GO:1990380 Lys48-…			TO	KOG2605	OTU (ovarian tumor)-like cysteine protease
F1MCI2	Nucleoside diphosphate kinase OS=Bos taurus OX=9913 GN=NME6 PE=3 SV=2	NME6	0.197068	Down	21.1602	27565.3	5432.25	1.67075	0.329252	mitochondria	K00940	ndk, NME; nucleoside-diphosphate kinase [EC:2.7.4.6]	map00230 Purine metabolism; map00240 Pyrimidine metabolism; map00983 Drug metabolism - other enzymes; map01100 Metabolic pathways; map01240 Biosynthesis of cofactors	GO:0001558 regulation of cell growth; GO:0006139 nucleobase-containing compound metabolic process; GO:0006165 nucleoside diphosphate phosphorylation; GO:0006725 cellular aromatic compound metabolic process; GO:0006753 nucleoside phosphate metabolic process; GO:0006793 phosphorus metabolic process; GO:0006796 phosphate-containing compound metabolic process; GO:0006807 nitrogen compound metabolic p…	GO:0005622 intracellular anatomical structure; GO:0005737 cytoplasm; GO:0005739 mitochondrion; GO:0005829 cytosol; GO:0043226 organelle; GO:0043227 membrane-bounded organelle; GO:0043229 intracellular organelle; GO:0043231 intracellular membrane-bounded organelle;	GO:0003824 catalytic activity; GO:0004550 nucleoside diphosphate kinase activity; GO:0016301 kinase activity; GO:0016740 transferase activity; GO:0016772 transferase activity, transferring phosphorus-containing groups; GO:0016776 phosphotransferase activity, phosphate group as acceptor; GO:0019205 nucleobase-containing compound kinase activity;	PF00334	PF00334 Nucleoside diphosphate kinase	F	KOG0888	Nucleoside diphosphate kinase
F1MCU6	Queuine tRNA-ribosyltransferase catalytic subunit 1 OS=Bos taurus OX=9913 GN=QTRT1 PE=3 SV=3	QTRT1	0.658612	Down	44.2449	26279.5	17308	1.20583	0.794173	cytoplasm	K00777	QTRT1; queuine tRNA-ribosyltransferase catalytic subunit [EC:2.4.2.64]		GO:0006139 nucleobase-containing compound metabolic process; GO:0006396 RNA processing; GO:0006399 tRNA metabolic process; GO:0006400 tRNA modification; GO:0006725 cellular aromatic compound metabolic process; GO:0006807 nitrogen compound metabolic process; GO:0008033 tRNA processing; GO:0008152 metabolic process; GO:0008616 queuosine biosynthetic process; GO:0009058 biosynthetic process; GO:0009…	GO:0005622 intracellular anatomical structure; GO:0005634 nucleus; GO:0005737 cytoplasm; GO:0005739 mitochondrion; GO:0005740 mitochondrial envelope; GO:0005741 mitochondrial outer membrane; GO:0016020 membrane; GO:0019867 outer membrane; GO:0031090 organelle membrane; GO:0031966 mitochondrial membrane; GO:0031967 organelle envelope; GO:0031968 organelle outer membrane; GO:0031975 envelope; GO:00…	GO:0003824 catalytic activity; GO:0005488 binding; GO:0005515 protein binding; GO:0008479 queuine tRNA-ribosyltransferase activity; GO:0016740 transferase activity; GO:0016757 glycosyltransferase activity; GO:0016763 pentosyltransferase activity; GO:0042802 identical protein binding; GO:0042803 protein homodimerization activity; GO:0046982 protein heterodimerization activity; GO:0046983 protein d…			A	KOG3908	Queuine-tRNA ribosyltransferase
F1MG80	N-myc-interactor OS=Bos taurus OX=9913 GN=NMI PE=3 SV=1	NMI	1.51372	Up	35.3788	6566.87	9940.41	0.795634	1.20437	cytoplasm				GO:0001817 regulation of cytokine production; GO:0001818 negative regulation of cytokine production; GO:0002682 regulation of immune system process; GO:0002683 negative regulation of immune system process; GO:0006139 nucleobase-containing compound metabolic process; GO:0006351 transcription, DNA-templated; GO:0006366 transcription by RNA polymerase II; GO:0006725 cellular aromatic compound metabo…	GO:0005622 intracellular anatomical structure; GO:0005634 nucleus; GO:0005654 nucleoplasm; GO:0005737 cytoplasm; GO:0005829 cytosol; GO:0031974 membrane-enclosed lumen; GO:0031981 nuclear lumen; GO:0043226 organelle; GO:0043227 membrane-bounded organelle; GO:0043229 intracellular organelle; GO:0043231 intracellular membrane-bounded organelle; GO:0043233 organelle lumen; GO:0070013 intracellular o…	GO:0003712 transcription coregulator activity; GO:0005488 binding; GO:0005515 protein binding; GO:0042802 identical protein binding; GO:0140110 transcription regulator activity;	PF07292	PF07292 Nmi/IFP 35 domain (NID)
F1MS24	Rab proteins geranylgeranyltransferase component A OS=Bos taurus OX=9913 GN=CHM PE=3 SV=2	CHM	0.614429	Down	73.2253	52292.3	32129.9	1.23883	0.761172	extracellular	K23460	CHM, CHML; Rab proteins geranylgeranyltransferase component A		GO:0001505 regulation of neurotransmitter levels; GO:0001568 blood vessel development; GO:0001944 vasculature development; GO:0003008 system process; GO:0006464 cellular protein modification process; GO:0006605 protein targeting; GO:0006612 protein targeting to membrane; GO:0006807 nitrogen compound metabolic process; GO:0006810 transport; GO:0006836 neurotransmitter transport; GO:0006886 intrace…	GO:0000922 spindle pole; GO:0005622 intracellular anatomical structure; GO:0005737 cytoplasm; GO:0005818 aster; GO:0005819 spindle; GO:0005829 cytosol; GO:0005856 cytoskeleton; GO:0005968 Rab-protein geranylgeranyltransferase complex; GO:0008021 synaptic vesicle; GO:0012505 endomembrane system; GO:0015630 microtubule cytoskeleton; GO:0016020 membrane; GO:0030133 transport vesicle; GO:0031410 cyto…	GO:0003824 catalytic activity; GO:0004659 prenyltransferase activity; GO:0004661 protein geranylgeranyltransferase activity; GO:0004663 Rab geranylgeranyltransferase activity; GO:0005488 binding; GO:0005515 protein binding; GO:0008318 protein prenyltransferase activity; GO:0016740 transferase activity; GO:0016765 transferase activity, transferring alkyl or aryl (other than methyl) groups; GO:0019…			TU	KOG4405	GDP dissociation inhibitor
F1MSS9	BAG cochaperone 4 OS=Bos taurus OX=9913 GN=BAG4 PE=4 SV=1	BAG4	1.88867	Up	49.4509	12323.7	23275.3	0.692361	1.30764	nucleus	K09558	BAG4; BCL2-associated athanogene 4	map04668 TNF signaling pathway	GO:0001932 regulation of protein phosphorylation; GO:0001934 positive regulation of protein phosphorylation; GO:0006457 protein folding; GO:0007154 cell communication; GO:0007165 signal transduction; GO:0007166 cell surface receptor signaling pathway; GO:0008064 regulation of actin polymerization or depolymerization; GO:0008104 protein localization; GO:0009719 response to endogenous stimulus; GO:…	GO:0005622 intracellular anatomical structure; GO:0005634 nucleus; GO:0005737 cytoplasm; GO:0005829 cytosol; GO:0005886 plasma membrane; GO:0016020 membrane; GO:0043226 organelle; GO:0043227 membrane-bounded organelle; GO:0043229 intracellular organelle; GO:0043231 intracellular membrane-bounded organelle; GO:0071944 cell periphery;	GO:0000166 nucleotide binding; GO:0000774 adenyl-nucleotide exchange factor activity; GO:0005488 binding; GO:0005515 protein binding; GO:0017076 purine nucleotide binding; GO:0019899 enzyme binding; GO:0030234 enzyme regulator activity; GO:0030554 adenyl nucleotide binding; GO:0031625 ubiquitin protein ligase binding; GO:0036094 small molecule binding; GO:0044389 ubiquitin-like protein ligase bin…			T	KOG4361	BCL2-associated athanogene-like proteins and related BAG family chaperone regulators
F1MTG9	SWI/SNF-related matrix-associated actin-dependent regulator of chromatin subfamily D member 1 OS=Bos taurus OX=9913 GN=SMARCD1 PE=3 SV=2	SMARCD1	1.53982	Up	58.2205	10922.7	16819	0.787456	1.21254	cytoplasm	K11650	SMARCD; SWI/SNF-related matrix-associated actin-dependent regulator of chromatin subfamily D	map04714 Thermogenesis	GO:0001672 regulation of chromatin assembly or disassembly; GO:0006325 chromatin organization; GO:0006333 chromatin assembly or disassembly; GO:0006337 nucleosome disassembly; GO:0006338 chromatin remodeling; GO:0006355 regulation of transcription, DNA-templated; GO:0006357 regulation of transcription by RNA polymerase II; GO:0006996 organelle organization; GO:0007275 multicellular organism devel…	GO:0000228 nuclear chromosome; GO:0000785 chromatin; GO:0000791 euchromatin; GO:0000793 condensed chromosome; GO:0005622 intracellular anatomical structure; GO:0005634 nucleus; GO:0005635 nuclear envelope; GO:0005654 nucleoplasm; GO:0005694 chromosome; GO:0012505 endomembrane system; GO:0016514 SWI/SNF complex; GO:0016586 RSC-type complex; GO:0031967 organelle envelope; GO:0031974 membrane-enclos…	GO:0003676 nucleic acid binding; GO:0003677 DNA binding; GO:0003682 chromatin binding; GO:0003712 transcription coregulator activity; GO:0003713 transcription coactivator activity; GO:0005102 signaling receptor binding; GO:0005198 structural molecule activity; GO:0005488 binding; GO:0005515 protein binding; GO:0008092 cytoskeletal protein binding; GO:0008134 transcription factor binding; GO:00170…	PF02201	PF02201 SWIB/MDM2 domain	BK	KOG2570	SWI/SNF transcription activation complex subunit
F1N1C3	Aquaporin OS=Bos taurus OX=9913 GN=AQP11 PE=3 SV=2	AQP11	0.39742	Down	30.4391	26510.7	10535.9	1.43121	0.568791	plasma membrane	K09870	AQP11; aquaporin-11		GO:0001655 urogenital system development; GO:0001822 kidney development; GO:0006810 transport; GO:0006833 water transport; GO:0006873 cellular ion homeostasis; GO:0006885 regulation of pH; GO:0006996 organelle organization; GO:0007032 endosome organization; GO:0007275 multicellular organism development; GO:0009888 tissue development; GO:0009987 cellular process; GO:0010256 endomembrane system org…	GO:0005622 intracellular anatomical structure; GO:0005737 cytoplasm; GO:0005783 endoplasmic reticulum; GO:0005829 cytosol; GO:0005886 plasma membrane; GO:0009986 cell surface; GO:0012505 endomembrane system; GO:0016020 membrane; GO:0030425 dendrite; GO:0036477 somatodendritic compartment; GO:0042995 cell projection; GO:0043005 neuron projection; GO:0043226 organelle; GO:0043227 membrane-bounded o…	GO:0005215 transporter activity; GO:0005372 water transmembrane transporter activity; GO:0015250 water channel activity; GO:0015267 channel activity; GO:0015318 inorganic molecular entity transmembrane transporter activity; GO:0022803 passive transmembrane transporter activity; GO:0022857 transmembrane transporter activity;
F1N1G6	4-hydroxybenzoate polyprenyltransferase, mitochondrial OS=Bos taurus OX=9913 GN=COQ2 PE=3 SV=1	COQ2	1.98532	Up	40.6514	26076.9	51770.9	0.669945	1.33006	plasma membrane	K06125	COQ2; 4-hydroxybenzoate polyprenyltransferase [EC:2.5.1.39]	map00130 Ubiquinone and other terpenoid-quinone biosynthesis; map01100 Metabolic pathways; map01240 Biosynthesis of cofactors	GO:0005975 carbohydrate metabolic process; GO:0006066 alcohol metabolic process; GO:0006071 glycerol metabolic process; GO:0006139 nucleobase-containing compound metabolic process; GO:0006351 transcription, DNA-templated; GO:0006360 transcription by RNA polymerase I; GO:0006383 transcription by RNA polymerase III; GO:0006725 cellular aromatic compound metabolic process; GO:0006743 ubiquinone meta…	GO:0000428 DNA-directed RNA polymerase complex; GO:0005622 intracellular anatomical structure; GO:0005634 nucleus; GO:0005654 nucleoplasm; GO:0005666 RNA polymerase III complex; GO:0005730 nucleolus; GO:0005736 RNA polymerase I complex; GO:0005737 cytoplasm; GO:0005739 mitochondrion; GO:0005740 mitochondrial envelope; GO:0005743 mitochondrial inner membrane; GO:0016020 membrane; GO:0016021 integr…	GO:0002083 4-hydroxybenzoate decaprenyltransferase activity; GO:0002094 polyprenyltransferase activity; GO:0003824 catalytic activity; GO:0004659 prenyltransferase activity; GO:0008412 4-hydroxybenzoate octaprenyltransferase activity; GO:0016740 transferase activity; GO:0016765 transferase activity, transferring alkyl or aryl (other than methyl) groups;			H	KOG1381	Para-hydroxybenzoate-polyprenyl transferase
F1N551	GATA binding protein 4 OS=Bos taurus OX=9913 GN=GATA4 PE=4 SV=1	GATA4	1.8418	Up	44.5395	2963.25	5457.72	0.703779	1.29622	nucleus	K09183	GATA4; GATA-binding protein 4	map04022 cGMP-PKG signaling pathway; map04218 Cellular senescence; map04530 Tight junction; map04919 Thyroid hormone signaling pathway	GO:0000003 reproduction; GO:0000122 negative regulation of transcription by RNA polymerase II; GO:0001101 response to acid chemical; GO:0001568 blood vessel development; GO:0001570 vasculogenesis; GO:0001655 urogenital system development; GO:0001678 cellular glucose homeostasis; GO:0001700 embryonic development via the syncytial blastoderm; GO:0001701 in utero embryonic development; GO:0001702 ga…	GO:0000228 nuclear chromosome; GO:0000785 chromatin; GO:0005622 intracellular anatomical structure; GO:0005634 nucleus; GO:0005654 nucleoplasm; GO:0005667 transcription regulator complex; GO:0005694 chromosome; GO:0016604 nuclear body; GO:0031974 membrane-enclosed lumen; GO:0031981 nuclear lumen; GO:0032991 protein-containing complex; GO:0043226 organelle; GO:0043227 membrane-bounded organelle; G…	GO:0000976 transcription cis-regulatory region binding; GO:0000977 RNA polymerase II transcription regulatory region sequence-specific DNA binding; GO:0000978 RNA polymerase II cis-regulatory region sequence-specific DNA binding; GO:0000981 DNA-binding transcription factor activity, RNA polymerase II-specific; GO:0000987 cis-regulatory region sequence-specific DNA binding; GO:0001067 transcriptio…	PF00320	PF00320 GATA zinc finger	K	KOG1601	GATA-4/5/6 transcription factors
F6R4N7	Superoxide dismutase [Cu-Zn] OS=Bos taurus OX=9913 GN=SOD3 PE=1 SV=1	SOD3	4.03329	Up	27.3901	14156.2	57096	0.397355	1.60265	extracellular	K16627	SOD3; superoxide dismutase, Cu-Zn family [EC:1.15.1.1]		GO:0000302 response to reactive oxygen species; GO:0000303 response to superoxide; GO:0000305 response to oxygen radical; GO:0001666 response to hypoxia; GO:0006801 superoxide metabolic process; GO:0006950 response to stress; GO:0006979 response to oxidative stress; GO:0008152 metabolic process; GO:0009628 response to abiotic stimulus; GO:0009636 response to toxic substance; GO:0009987 cellular p…	GO:0005576 extracellular region; GO:0005615 extracellular space; GO:0005622 intracellular anatomical structure; GO:0005634 nucleus; GO:0005737 cytoplasm; GO:0005794 Golgi apparatus; GO:0005796 Golgi lumen; GO:0012505 endomembrane system; GO:0031012 extracellular matrix; GO:0031974 membrane-enclosed lumen; GO:0043226 organelle; GO:0043227 membrane-bounded organelle; GO:0043229 intracellular organe…	GO:0003824 catalytic activity; GO:0004784 superoxide dismutase activity; GO:0005488 binding; GO:0005507 copper ion binding; GO:0008270 zinc ion binding; GO:0016209 antioxidant activity; GO:0016491 oxidoreductase activity; GO:0016721 oxidoreductase activity, acting on superoxide radicals as acceptor; GO:0043167 ion binding; GO:0043169 cation binding; GO:0046872 metal ion binding; GO:0046914 transi…	PF00080	PF00080 Copper/zinc superoxide dismutase (SODC)	P	KOG0441	Cu2+/Zn2+ superoxide dismutase SOD1
G3N0V2	Keratin, type II cytoskeletal 1 OS=Bos taurus OX=9913 GN=KRT1 PE=1 SV=2	KRT1	0.584238	Down	63.1654	161150	94150.1	1.26244	0.737563	nucleus	K07605	KRT2; type II keratin, basic		GO:0001775 cell activation; GO:0001867 complement activation, lectin pathway; GO:0002252 immune effector process; GO:0002253 activation of immune response; GO:0002263 cell activation involved in immune response; GO:0002274 myeloid leukocyte activation; GO:0002275 myeloid cell activation involved in immune response; GO:0002283 neutrophil activation involved in immune response; GO:0002366 leukocyte…	GO:0001533 cornified envelope; GO:0005576 extracellular region; GO:0005622 intracellular anatomical structure; GO:0005737 cytoplasm; GO:0005829 cytosol; GO:0005856 cytoskeleton; GO:0005882 intermediate filament; GO:0005886 plasma membrane; GO:0012505 endomembrane system; GO:0016020 membrane; GO:0030141 secretory granule; GO:0031410 cytoplasmic vesicle; GO:0031974 membrane-enclosed lumen; GO:00319…	GO:0005198 structural molecule activity; GO:0005488 binding; GO:0005515 protein binding; GO:0030246 carbohydrate binding; GO:0030280 structural constituent of skin epidermis; GO:0038023 signaling receptor activity; GO:0046982 protein heterodimerization activity; GO:0046983 protein dimerization activity; GO:0060089 molecular transducer activity;
G5E518	Cyclin-dependent kinase 12 OS=Bos taurus OX=9913 GN=CDK12 PE=4 SV=2	CDK12	0.36465	Down	164.125	19818.6	7226.84	1.46558	0.534422	nucleus	K08819	CDK12_13; cyclin-dependent kinase 12/13 [EC:2.7.11.22 2.7.11.23]		GO:0001932 regulation of protein phosphorylation; GO:0006139 nucleobase-containing compound metabolic process; GO:0006351 transcription, DNA-templated; GO:0006354 DNA-templated transcription, elongation; GO:0006355 regulation of transcription, DNA-templated; GO:0006357 regulation of transcription by RNA polymerase II; GO:0006366 transcription by RNA polymerase II; GO:0006368 transcription elongat…	GO:0000228 nuclear chromosome; GO:0000307 cyclin-dependent protein kinase holoenzyme complex; GO:0001650 fibrillar center; GO:0002944 cyclin K-CDK12 complex; GO:0005622 intracellular anatomical structure; GO:0005634 nucleus; GO:0005654 nucleoplasm; GO:0005694 chromosome; GO:0005700 polytene chromosome; GO:0005703 polytene chromosome puff; GO:0005730 nucleolus; GO:0008023 transcription elongation …	GO:0001067 transcription regulatory region nucleic acid binding; GO:0003676 nucleic acid binding; GO:0003677 DNA binding; GO:0003824 catalytic activity; GO:0004672 protein kinase activity; GO:0004674 protein serine/threonine kinase activity; GO:0004693 cyclin-dependent protein serine/threonine kinase activity; GO:0005488 binding; GO:0005515 protein binding; GO:0008134 transcription factor binding…	PF00069	PF00069 Protein kinase domain	D	KOG0600	Cdc2-related protein kinase
O46375	Transthyretin OS=Bos taurus OX=9913 GN=TTR PE=1 SV=1	TTR	1.50026	Up	15.727	32125.8	48196.9	0.799918	1.20008	extracellular	K20731	TTR; transthyretin	map04918 Thyroid hormone synthesis	GO:0000003 reproduction; GO:0001523 retinoid metabolic process; GO:0001555 oocyte growth; GO:0001775 cell activation; GO:0002252 immune effector process; GO:0002263 cell activation involved in immune response; GO:0002274 myeloid leukocyte activation; GO:0002275 myeloid cell activation involved in immune response; GO:0002283 neutrophil activation involved in immune response; GO:0002366 leukocyte a…	GO:0000323 lytic vacuole; GO:0005576 extracellular region; GO:0005615 extracellular space; GO:0005622 intracellular anatomical structure; GO:0005737 cytoplasm; GO:0005764 lysosome; GO:0005766 primary lysosome; GO:0005773 vacuole; GO:0005775 vacuolar lumen; GO:0012505 endomembrane system; GO:0030135 coated vesicle; GO:0030136 clathrin-coated vesicle; GO:0030141 secretory granule; GO:0031410 cytopl…	GO:0005488 binding; GO:0005515 protein binding; GO:0019904 protein domain specific binding; GO:0036094 small molecule binding; GO:0042562 hormone binding; GO:0042802 identical protein binding; GO:0046982 protein heterodimerization activity; GO:0046983 protein dimerization activity; GO:0070324 thyroid hormone binding;	PF00576	PF00576 HIUase/Transthyretin family	I	KOG3006	Transthyretin and related proteins
P53793	Sodium/myo-inositol cotransporter OS=Bos taurus OX=9913 GN=SLC5A3 PE=3 SV=1	SLC5A3	1.82665	Up	79.674	6724.25	12282.8	0.707552	1.29245	plasma membrane	K14383	SLC5A3, SMIT; solute carrier family 5 (sodium/myo-inositol cotransporter), member 3		GO:0005975 carbohydrate metabolic process; GO:0006020 inositol metabolic process; GO:0006066 alcohol metabolic process; GO:0006810 transport; GO:0006811 ion transport; GO:0006812 cation transport; GO:0006814 sodium ion transport; GO:0007275 multicellular organism development; GO:0007399 nervous system development; GO:0007422 peripheral nervous system development; GO:0008152 metabolic process; GO:…	GO:0005886 plasma membrane; GO:0005887 integral component of plasma membrane; GO:0016020 membrane; GO:0016021 integral component of membrane; GO:0031224 intrinsic component of membrane; GO:0031226 intrinsic component of plasma membrane; GO:0071944 cell periphery;	GO:0005215 transporter activity; GO:0005365 myo-inositol transmembrane transporter activity; GO:0005367 myo-inositol:sodium symporter activity; GO:0008324 cation transmembrane transporter activity; GO:0015075 ion transmembrane transporter activity; GO:0015081 sodium ion transmembrane transporter activity; GO:0015166 polyol transmembrane transporter activity; GO:0015291 secondary active transmembr…			P	KOG2349	Na+:iodide/myo-inositol/multivitamin symporters
P61282	NEDD8 OS=Bos taurus OX=9913 GN=NEDD8 PE=3 SV=1	NEDD8	1.57215	Up	9.07155	73934.1	116236	0.777559	1.22244	cytoplasm	K12158	NEDD8; ubiquitin-like protein Nedd8		GO:0006355 regulation of transcription, DNA-templated; GO:0006357 regulation of transcription by RNA polymerase II; GO:0006464 cellular protein modification process; GO:0006508 proteolysis; GO:0006511 ubiquitin-dependent protein catabolic process; GO:0006807 nitrogen compound metabolic process; GO:0006873 cellular ion homeostasis; GO:0006875 cellular metal ion homeostasis; GO:0006879 cellular iro…	GO:0005622 intracellular anatomical structure; GO:0005634 nucleus; GO:0005654 nucleoplasm; GO:0005737 cytoplasm; GO:0005829 cytosol; GO:0031974 membrane-enclosed lumen; GO:0031981 nuclear lumen; GO:0043226 organelle; GO:0043227 membrane-bounded organelle; GO:0043229 intracellular organelle; GO:0043231 intracellular membrane-bounded organelle; GO:0043233 organelle lumen; GO:0070013 intracellular o…	GO:0005488 binding; GO:0005515 protein binding; GO:0019899 enzyme binding; GO:0031625 ubiquitin protein ligase binding; GO:0044389 ubiquitin-like protein ligase binding;	PF00240	PF00240 Ubiquitin family	DO	KOG0005	Ubiquitin-like protein
Q08DH9	CCCTC-binding factor OS=Bos taurus OX=9913 GN=CTCF PE=2 SV=1	CTCF	0.533722	Down	82.7243	15945.4	8510.43	1.30402	0.695982	nucleus	K23195	CTCF, CTCFL; transcriptional repressor CTCF		GO:0000122 negative regulation of transcription by RNA polymerase II; GO:0003002 regionalization; GO:0006139 nucleobase-containing compound metabolic process; GO:0006259 DNA metabolic process; GO:0006304 DNA modification; GO:0006305 DNA alkylation; GO:0006306 DNA methylation; GO:0006323 DNA packaging; GO:0006325 chromatin organization; GO:0006333 chromatin assembly or disassembly; GO:0006349 regu…	GO:0000775 chromosome, centromeric region; GO:0000793 condensed chromosome; GO:0005622 intracellular anatomical structure; GO:0005634 nucleus; GO:0005654 nucleoplasm; GO:0005694 chromosome; GO:0005730 nucleolus; GO:0031974 membrane-enclosed lumen; GO:0031981 nuclear lumen; GO:0043226 organelle; GO:0043227 membrane-bounded organelle; GO:0043228 non-membrane-bounded organelle; GO:0043229 intracellu…	GO:0000976 transcription cis-regulatory region binding; GO:0000977 RNA polymerase II transcription regulatory region sequence-specific DNA binding; GO:0000978 RNA polymerase II cis-regulatory region sequence-specific DNA binding; GO:0000981 DNA-binding transcription factor activity, RNA polymerase II-specific; GO:0000987 cis-regulatory region sequence-specific DNA binding; GO:0001067 transcriptio…	PF00096; PF13909	PF00096 Zinc finger, C2H2 type; PF13909 C2H2-type zinc-finger domain	R	KOG1721	FOG: Zn-finger
Q0IIJ2	Histone H1.0 OS=Bos taurus OX=9913 GN=H1-0 PE=2 SV=3	H1-0	0.426564	Down	20.9509	4133.97	1763.4	1.40197	0.59803	nucleus	K11275	H1_5; histone H1/5		GO:0000737 DNA catabolic process, endonucleolytic; GO:0006139 nucleobase-containing compound metabolic process; GO:0006259 DNA metabolic process; GO:0006308 DNA catabolic process; GO:0006309 apoptotic DNA fragmentation; GO:0006323 DNA packaging; GO:0006325 chromatin organization; GO:0006333 chromatin assembly or disassembly; GO:0006334 nucleosome assembly; GO:0006725 cellular aromatic compound me…	GO:0000228 nuclear chromosome; GO:0000785 chromatin; GO:0000786 nucleosome; GO:0000791 euchromatin; GO:0005622 intracellular anatomical structure; GO:0005634 nucleus; GO:0005654 nucleoplasm; GO:0005694 chromosome; GO:0005737 cytoplasm; GO:0005794 Golgi apparatus; GO:0005856 cytoskeleton; GO:0012505 endomembrane system; GO:0015629 actin cytoskeleton; GO:0016604 nuclear body; GO:0031974 membrane-en…	GO:0003676 nucleic acid binding; GO:0003677 DNA binding; GO:0003680 minor groove of adenine-thymine-rich DNA binding; GO:0003682 chromatin binding; GO:0003690 double-stranded DNA binding; GO:0005488 binding; GO:0031490 chromatin DNA binding; GO:0031491 nucleosome binding; GO:0031492 nucleosomal DNA binding; GO:0043565 sequence-specific DNA binding; GO:0044877 protein-containing complex binding; G…	PF00538	PF00538 linker histone H1 and H5 family	B	KOG4012	Histone H1
Q0P5A1	Dynactin subunit 3 OS=Bos taurus OX=9913 GN=DCTN3 PE=2 SV=1	DCTN3	0.665826	Down	21.1915	26292.3	17506.1	1.20061	0.799394	cytoplasm	K10425	DCTN3; dynactin 3		GO:0000086 G2/M transition of mitotic cell cycle; GO:0000278 mitotic cell cycle; GO:0000910 cytokinesis; GO:0002376 immune system process; GO:0002478 antigen processing and presentation of exogenous peptide antigen; GO:0002495 antigen processing and presentation of peptide antigen via MHC class II; GO:0002504 antigen processing and presentation of peptide or polysaccharide antigen via MHC class I…	GO:0005622 intracellular anatomical structure; GO:0005634 nucleus; GO:0005730 nucleolus; GO:0005737 cytoplasm; GO:0005813 centrosome; GO:0005815 microtubule organizing center; GO:0005829 cytosol; GO:0005856 cytoskeleton; GO:0005869 dynactin complex; GO:0005875 microtubule associated complex; GO:0015629 actin cytoskeleton; GO:0015630 microtubule cytoskeleton; GO:0031974 membrane-enclosed lumen; GO…	GO:0005198 structural molecule activity;
Q0P5A7	Eukaryotic translation initiation factor 4E-binding protein 1 OS=Bos taurus OX=9913 GN=EIF4EBP1 PE=3 SV=1	EIF4EBP1	2.86423	Up	12.588	2859.62	8190.62	0.517567	1.48243	mitochondria	K07205	EIF4EBP1; eukaryotic translation initiation factor 4E binding protein 1	map04012 ErbB signaling pathway; map04066 HIF-1 signaling pathway; map04150 mTOR signaling pathway; map04151 PI3K-Akt signaling pathway; map04152 AMPK signaling pathway; map04211 Longevity regulating pathway; map04218 Cellular senescence; map04910 Insulin signaling pathway	GO:0000082 G1/S transition of mitotic cell cycle; GO:0000278 mitotic cell cycle; GO:0001666 response to hypoxia; GO:0002181 cytoplasmic translation; GO:0002183 cytoplasmic translational initiation; GO:0002190 cap-independent translational initiation; GO:0002192 IRES-dependent translational initiation of linear mRNA; GO:0002931 response to ischemia; GO:0006412 translation; GO:0006413 translational…	GO:0005622 intracellular anatomical structure; GO:0005634 nucleus; GO:0005737 cytoplasm; GO:0005829 cytosol; GO:0032991 protein-containing complex; GO:0043226 organelle; GO:0043227 membrane-bounded organelle; GO:0043229 intracellular organelle; GO:0043231 intracellular membrane-bounded organelle;	GO:0005488 binding; GO:0005515 protein binding; GO:0008190 eukaryotic initiation factor 4E binding; GO:0019899 enzyme binding; GO:0019902 phosphatase binding; GO:0019903 protein phosphatase binding; GO:0030371 translation repressor activity; GO:0031369 translation initiation factor binding; GO:0045182 translation regulator activity; GO:0051721 protein phosphatase 2A binding;
Q0VCC5	Replication initiator 1 OS=Bos taurus OX=9913 GN=REPIN1 PE=2 SV=1	REPIN1	2.73228	Up	62.3723	4039.69	11037.6	0.535865	1.46414	nucleus				GO:0006139 nucleobase-containing compound metabolic process; GO:0006259 DNA metabolic process; GO:0006260 DNA replication; GO:0006725 cellular aromatic compound metabolic process; GO:0006807 nitrogen compound metabolic process; GO:0008152 metabolic process; GO:0009058 biosynthetic process; GO:0009059 macromolecule biosynthetic process; GO:0009987 cellular process; GO:0010827 regulation of glucose…	GO:0000228 nuclear chromosome; GO:0000808 origin recognition complex; GO:0005622 intracellular anatomical structure; GO:0005634 nucleus; GO:0005635 nuclear envelope; GO:0005664 nuclear origin of replication recognition complex; GO:0005694 chromosome; GO:0005737 cytoplasm; GO:0005811 lipid droplet; GO:0005829 cytosol; GO:0005840 ribosome; GO:0012505 endomembrane system; GO:0016020 membrane; GO:002…	GO:0003676 nucleic acid binding; GO:0003677 DNA binding; GO:0005488 binding; GO:0097159 organic cyclic compound binding; GO:1901363 heterocyclic compound binding;	PF00096	PF00096 Zinc finger, C2H2 type	R	KOG1721	FOG: Zn-finger
Q17QA0	Gem-associated protein 7 OS=Bos taurus OX=9913 GN=GEMIN7 PE=2 SV=1	GEMIN7	1.65723	Up	13.8509	22403.9	37128.4	0.752664	1.24734	cytoplasm	K13135	GEMIN7, SIP3; gem associated protein 7		GO:0000375 RNA splicing, via transesterification reactions; GO:0000377 RNA splicing, via transesterification reactions with bulged adenosine as nucleophile; GO:0000387 spliceosomal snRNP assembly; GO:0000398 mRNA splicing, via spliceosome; GO:0006139 nucleobase-containing compound metabolic process; GO:0006396 RNA processing; GO:0006397 mRNA processing; GO:0006725 cellular aromatic compound metab…	GO:0005622 intracellular anatomical structure; GO:0005634 nucleus; GO:0005654 nucleoplasm; GO:0005737 cytoplasm; GO:0005829 cytosol; GO:0016604 nuclear body; GO:0031974 membrane-enclosed lumen; GO:0031981 nuclear lumen; GO:0032797 SMN complex; GO:0032991 protein-containing complex; GO:0034719 SMN-Sm protein complex; GO:0043226 organelle; GO:0043227 membrane-bounded organelle; GO:0043229 intracell…		PF12901	PF12901 SUZ-C motif
Q17QI9	Phosphatidylinositol-4,5-bisphosphate 4-phosphatase OS=Bos taurus OX=9913 GN=PIP4P1 PE=2 SV=1	PIP4P1	1.97	Up	29.4375	11908.1	23458.9	0.673401	1.3266	plasma membrane	K13084	TMEM55; phosphatidylinositol-4,5-bisphosphate 4-phosphatase [EC:3.1.3.78]	map04070 Phosphatidylinositol signaling system	GO:0006629 lipid metabolic process; GO:0006644 phospholipid metabolic process; GO:0006650 glycerophospholipid metabolic process; GO:0006793 phosphorus metabolic process; GO:0006796 phosphate-containing compound metabolic process; GO:0008152 metabolic process; GO:0009987 cellular process; GO:0016311 dephosphorylation; GO:0019637 organophosphate metabolic process; GO:0030258 lipid modification; GO:…	GO:0000323 lytic vacuole; GO:0005622 intracellular anatomical structure; GO:0005634 nucleus; GO:0005654 nucleoplasm; GO:0005737 cytoplasm; GO:0005764 lysosome; GO:0005765 lysosomal membrane; GO:0005768 endosome; GO:0005770 late endosome; GO:0005773 vacuole; GO:0005774 vacuolar membrane; GO:0010008 endosome membrane; GO:0012505 endomembrane system; GO:0016020 membrane; GO:0031090 organelle membran…	GO:0003824 catalytic activity; GO:0016787 hydrolase activity; GO:0016788 hydrolase activity, acting on ester bonds; GO:0016791 phosphatase activity; GO:0034593 phosphatidylinositol bisphosphate phosphatase activity; GO:0034596 phosphatidylinositol phosphate 4-phosphatase activity; GO:0034597 phosphatidylinositol-4,5-bisphosphate 4-phosphatase activity; GO:0042578 phosphoric ester hydrolase activi…			R	KOG4684	Uncharacterized conserved protein, contains C4-type Zn-finger
Q1RMP0	DNA-directed RNA polymerase I subunit RPA12 OS=Bos taurus OX=9913 GN=POLR1H PE=2 SV=1	POLR1H	0.637146	Down	13.5053	14771.3	9411.49	1.22164	0.778362	extracellular	K03000	RPA12, POLR1H, ZNRD1; DNA-directed RNA polymerase I subunit RPA12	map03020 RNA polymerase	GO:0006139 nucleobase-containing compound metabolic process; GO:0006351 transcription, DNA-templated; GO:0006352 DNA-templated transcription, initiation; GO:0006353 DNA-templated transcription, termination; GO:0006360 transcription by RNA polymerase I; GO:0006361 transcription initiation from RNA polymerase I promoter; GO:0006363 termination of RNA polymerase I transcription; GO:0006725 cellular …	GO:0000428 DNA-directed RNA polymerase complex; GO:0005622 intracellular anatomical structure; GO:0005634 nucleus; GO:0005654 nucleoplasm; GO:0005730 nucleolus; GO:0005736 RNA polymerase I complex; GO:0030880 RNA polymerase complex; GO:0031974 membrane-enclosed lumen; GO:0031981 nuclear lumen; GO:0032991 protein-containing complex; GO:0043226 organelle; GO:0043227 membrane-bounded organelle; GO:0…		PF01096	PF01096 Transcription factor S-II (TFIIS)	K	KOG2907	RNA polymerase I transcription factor TFIIS, subunit A12.2/RPA12
Q1RMW0	Phospholipid scramblase OS=Bos taurus OX=9913 GN=PLSCR3 PE=2 SV=1	PLSCR3	2.66748	Up	32.2251	3871.76	10327.8	0.545334	1.45467	cytoplasm				GO:0002237 response to molecule of bacterial origin; GO:0006810 transport; GO:0006811 ion transport; GO:0006820 anion transport; GO:0006869 lipid transport; GO:0007009 plasma membrane organization; GO:0009605 response to external stimulus; GO:0009607 response to biotic stimulus; GO:0009617 response to bacterium; GO:0009987 cellular process; GO:0010033 response to organic substance; GO:0010256 end…	GO:0005622 intracellular anatomical structure; GO:0005737 cytoplasm; GO:0005739 mitochondrion; GO:0005886 plasma membrane; GO:0016020 membrane; GO:0043226 organelle; GO:0043227 membrane-bounded organelle; GO:0043229 intracellular organelle; GO:0043231 intracellular membrane-bounded organelle; GO:0071944 cell periphery;	GO:0005215 transporter activity; GO:0005319 lipid transporter activity; GO:0005488 binding; GO:0005509 calcium ion binding; GO:0005515 protein binding; GO:0005548 phospholipid transporter activity; GO:0017128 phospholipid scramblase activity; GO:0043167 ion binding; GO:0043169 cation binding; GO:0046872 metal ion binding; GO:0048306 calcium-dependent protein binding;	PF03803	PF03803 Scramblase	M	KOG0621	Phospholipid scramblase
Q2KI56	COP9 signalosome complex subunit 7b OS=Bos taurus OX=9913 GN=COPS7B PE=2 SV=1	COPS7B	1.67498	Up	29.5949	20602.3	34508.5	0.747669	1.25233	cytoplasm	K12180	COPS7, CSN7; COP9 signalosome complex subunit 7		GO:0000003 reproduction; GO:0000338 protein deneddylation; GO:0000715 nucleotide-excision repair, DNA damage recognition; GO:0002009 morphogenesis of an epithelium; GO:0003006 developmental process involved in reproduction; GO:0006139 nucleobase-containing compound metabolic process; GO:0006259 DNA metabolic process; GO:0006281 DNA repair; GO:0006283 transcription-coupled nucleotide-excision repa…	GO:0005622 intracellular anatomical structure; GO:0005634 nucleus; GO:0005654 nucleoplasm; GO:0005737 cytoplasm; GO:0005829 cytosol; GO:0008180 COP9 signalosome; GO:0031974 membrane-enclosed lumen; GO:0031981 nuclear lumen; GO:0032991 protein-containing complex; GO:0034399 nuclear periphery; GO:0043226 organelle; GO:0043227 membrane-bounded organelle; GO:0043229 intracellular organelle; GO:004323…	GO:0005488 binding; GO:0005515 protein binding;	PF01399; PF18392	PF01399 PCI domain; PF18392 COP9 signalosome complex subunit 7a helix I domain	OT	KOG3250	COP9 signalosome, subunit CSN7
Q2KJE5	Glyceraldehyde-3-phosphate dehydrogenase, testis-specific OS=Bos taurus OX=9913 GN=GAPDHS PE=2 SV=1	GAPDHS	2.02921	Up	43.288	17413.5	35335.7	0.660239	1.33976	cytoplasm	K10705	GAPDHS; glyceraldehyde-3-phosphate dehydrogenase (phosphorylating), spermatogenic [EC:1.2.1.12]	map00010 Glycolysis / Gluconeogenesis; map01100 Metabolic pathways	GO:0000003 reproduction; GO:0000226 microtubule cytoskeleton organization; GO:0000768 syncytium formation by plasma membrane fusion; GO:0003006 developmental process involved in reproduction; GO:0005975 carbohydrate metabolic process; GO:0005996 monosaccharide metabolic process; GO:0006006 glucose metabolic process; GO:0006007 glucose catabolic process; GO:0006082 organic acid metabolic process; …	GO:0001669 acrosomal vesicle; GO:0005622 intracellular anatomical structure; GO:0005634 nucleus; GO:0005737 cytoplasm; GO:0005829 cytosol; GO:0005856 cytoskeleton; GO:0005929 cilium; GO:0012505 endomembrane system; GO:0015630 microtubule cytoskeleton; GO:0030016 myofibril; GO:0030017 sarcomere; GO:0030018 Z disc; GO:0030141 secretory granule; GO:0031410 cytoplasmic vesicle; GO:0031430 M band; GO:…	GO:0003824 catalytic activity; GO:0004365 glyceraldehyde-3-phosphate dehydrogenase (NAD+) (phosphorylating) activity; GO:0005488 binding; GO:0005515 protein binding; GO:0008017 microtubule binding; GO:0008092 cytoskeletal protein binding; GO:0015631 tubulin binding; GO:0016491 oxidoreductase activity; GO:0016620 oxidoreductase activity, acting on the aldehyde or oxo group of donors, NAD or NADP a…	PF00044; PF02800	PF00044 Glyceraldehyde 3-phosphate dehydrogenase, NAD binding domain; PF02800 Glyceraldehyde 3-phosphate dehydrogenase, C-terminal domain	G	KOG0657	Glyceraldehyde 3-phosphate dehydrogenase
Q2NKU6	Protein dpy-30 homolog OS=Bos taurus OX=9913 GN=DPY30 PE=3 SV=1	DPY30	1.86149	Up	11.2497	30136.7	56099.1	0.698938	1.30106	cytoplasm	K14965	DPY30; protein dpy-30		GO:0000003 reproduction; GO:0003006 developmental process involved in reproduction; GO:0006325 chromatin organization; GO:0006355 regulation of transcription, DNA-templated; GO:0006464 cellular protein modification process; GO:0006479 protein methylation; GO:0006807 nitrogen compound metabolic process; GO:0006810 transport; GO:0006928 movement of cell or subcellular component; GO:0006996 organell…	GO:0005622 intracellular anatomical structure; GO:0005634 nucleus; GO:0005654 nucleoplasm; GO:0005737 cytoplasm; GO:0005794 Golgi apparatus; GO:0005802 trans-Golgi network; GO:0012505 endomembrane system; GO:0031974 membrane-enclosed lumen; GO:0031981 nuclear lumen; GO:0031984 organelle subcompartment; GO:0032991 protein-containing complex; GO:0034708 methyltransferase complex; GO:0035097 histone…	GO:0005488 binding; GO:0005515 protein binding; GO:0042802 identical protein binding; GO:0042803 protein homodimerization activity; GO:0046983 protein dimerization activity;			K	KOG4109	Histone H3 (Lys4) methyltransferase complex, subunit CPS25/DPY-30
Q2NL00	Glutathione S-transferase theta-1 OS=Bos taurus OX=9913 GN=GSTT1 PE=2 SV=3	GSTT1	1.67115	Up	27.149	24332.3	40662.8	0.748742	1.25126	cytoplasm	K00799	GST, gst; glutathione S-transferase [EC:2.5.1.18]	map00480 Glutathione metabolism; map00980 Metabolism of xenobiotics by cytochrome P450; map00982 Drug metabolism - cytochrome P450; map00983 Drug metabolism - other enzymes; map01100 Metabolic pathways; map04212 Longevity regulating pathway - worm	GO:0001101 response to acid chemical; GO:0006139 nucleobase-containing compound metabolic process; GO:0006259 DNA metabolic process; GO:0006304 DNA modification; GO:0006518 peptide metabolic process; GO:0006575 cellular modified amino acid metabolic process; GO:0006725 cellular aromatic compound metabolic process; GO:0006749 glutathione metabolic process; GO:0006790 sulfur compound metabolic proc…	GO:0005622 intracellular anatomical structure; GO:0005634 nucleus; GO:0005737 cytoplasm; GO:0005829 cytosol; GO:0043226 organelle; GO:0043227 membrane-bounded organelle; GO:0043229 intracellular organelle; GO:0043231 intracellular membrane-bounded organelle;	GO:0003824 catalytic activity; GO:0004364 glutathione transferase activity; GO:0004601 peroxidase activity; GO:0004602 glutathione peroxidase activity; GO:0016209 antioxidant activity; GO:0016491 oxidoreductase activity; GO:0016684 oxidoreductase activity, acting on peroxide as acceptor; GO:0016740 transferase activity; GO:0016765 transferase activity, transferring alkyl or aryl (other than methy…	PF02798; PF00043	PF02798 Glutathione S-transferase, N-terminal domain; PF00043 Glutathione S-transferase, C-terminal domain	O	KOG0867	Glutathione S-transferase
Q32PJ6	Probable cytosolic iron-sulfur protein assembly protein CIAO1 OS=Bos taurus OX=9913 GN=CIAO1 PE=2 SV=1	CIAO1	1.71194	Up	37.7729	22729.2	38910.9	0.73748	1.26252	extracellular	K24730	CIAO1, CIA1; cytosolic iron-sulfur protein assembly protein CIAO1		GO:0006355 regulation of transcription, DNA-templated; GO:0006357 regulation of transcription by RNA polymerase II; GO:0006790 sulfur compound metabolic process; GO:0008152 metabolic process; GO:0008284 positive regulation of cell population proliferation; GO:0009889 regulation of biosynthetic process; GO:0009987 cellular process; GO:0010468 regulation of gene expression; GO:0010556 regulation of…	GO:0005622 intracellular anatomical structure; GO:0005737 cytoplasm; GO:0005819 spindle; GO:0005829 cytosol; GO:0005856 cytoskeleton; GO:0015630 microtubule cytoskeleton; GO:0032991 protein-containing complex; GO:0043226 organelle; GO:0043228 non-membrane-bounded organelle; GO:0043229 intracellular organelle; GO:0043232 intracellular non-membrane-bounded organelle; GO:0071817 MMXD complex; GO:009…	GO:0003700 DNA-binding transcription factor activity; GO:0005488 binding; GO:0005515 protein binding; GO:0140110 transcription regulator activity;			R	KOG0645	WD40 repeat protein
Q3MHP3	Protein S100-A14 OS=Bos taurus OX=9913 GN=S100A14 PE=3 SV=1	S100A14	1.68681	Up	11.4097	17096.5	28838.6	0.744378	1.25562	extracellular	K23767	S100A14; protein S100-A14		GO:0002218 activation of innate immune response; GO:0002221 pattern recognition receptor signaling pathway; GO:0002224 toll-like receptor signaling pathway; GO:0002237 response to molecule of bacterial origin; GO:0002253 activation of immune response; GO:0002376 immune system process; GO:0002682 regulation of immune system process; GO:0002684 positive regulation of immune system process; GO:00026…	GO:0005622 intracellular anatomical structure; GO:0005634 nucleus; GO:0005654 nucleoplasm; GO:0005737 cytoplasm; GO:0005829 cytosol; GO:0005886 plasma membrane; GO:0016020 membrane; GO:0016604 nuclear body; GO:0030054 cell junction; GO:0031974 membrane-enclosed lumen; GO:0031981 nuclear lumen; GO:0043226 organelle; GO:0043227 membrane-bounded organelle; GO:0043229 intracellular organelle; GO:0043…	GO:0001664 G protein-coupled receptor binding; GO:0005102 signaling receptor binding; GO:0005126 cytokine receptor binding; GO:0005488 binding; GO:0005509 calcium ion binding; GO:0005515 protein binding; GO:0042379 chemokine receptor binding; GO:0043167 ion binding; GO:0043169 cation binding; GO:0046872 metal ion binding;	PF01023	PF01023 S-100/ICaBP type calcium binding domain
Q3SX24	F-box only protein 6 OS=Bos taurus OX=9913 GN=FBXO6 PE=2 SV=1	FBXO6	0.665463	Down	30.7673	19697.8	13108.1	1.20087	0.799133	cytoplasm	K10100	FBXO6; F-box protein 6	map04141 Protein processing in endoplasmic reticulum	GO:0000075 cell cycle checkpoint signaling; GO:0000077 DNA damage checkpoint signaling; GO:0000209 protein polyubiquitination; GO:0006139 nucleobase-containing compound metabolic process; GO:0006259 DNA metabolic process; GO:0006281 DNA repair; GO:0006464 cellular protein modification process; GO:0006508 proteolysis; GO:0006511 ubiquitin-dependent protein catabolic process; GO:0006516 glycoprotei…	GO:0000151 ubiquitin ligase complex; GO:0005622 intracellular anatomical structure; GO:0005737 cytoplasm; GO:0005783 endoplasmic reticulum; GO:0005829 cytosol; GO:0012505 endomembrane system; GO:0019005 SCF ubiquitin ligase complex; GO:0031461 cullin-RING ubiquitin ligase complex; GO:0032991 protein-containing complex; GO:0043226 organelle; GO:0043227 membrane-bounded organelle; GO:0043229 intrac…	GO:0003824 catalytic activity; GO:0004842 ubiquitin-protein transferase activity; GO:0005488 binding; GO:0005515 protein binding; GO:0016740 transferase activity; GO:0019787 ubiquitin-like protein transferase activity; GO:0030246 carbohydrate binding; GO:0140096 catalytic activity, acting on a protein;	PF12937	PF12937 F-box-like
Q3SZN5	DNA polymerase epsilon subunit 3 OS=Bos taurus OX=9913 GN=POLE3 PE=2 SV=1	POLE3	0.566019	Down	16.8596	10934	6188.85	1.27712	0.722877	nucleus	K02326	POLE3; DNA polymerase epsilon subunit 3 [EC:2.7.7.7]	map03030 DNA replication; map03410 Base excision repair; map03420 Nucleotide excision repair	GO:0006325 chromatin organization; GO:0006464 cellular protein modification process; GO:0006473 protein acetylation; GO:0006475 internal protein amino acid acetylation; GO:0006807 nitrogen compound metabolic process; GO:0006996 organelle organization; GO:0008152 metabolic process; GO:0009987 cellular process; GO:0016043 cellular component organization; GO:0016570 histone modification; GO:0016573 …	GO:0000123 histone acetyltransferase complex; GO:0000228 nuclear chromosome; GO:0005622 intracellular anatomical structure; GO:0005634 nucleus; GO:0005654 nucleoplasm; GO:0005694 chromosome; GO:0008622 epsilon DNA polymerase complex; GO:0031248 protein acetyltransferase complex; GO:0031974 membrane-enclosed lumen; GO:0031981 nuclear lumen; GO:0032991 protein-containing complex; GO:0042575 DNA pol…		PF00808	PF00808 Histone-like transcription factor (CBF/NF-Y) and archaeal histone	K	KOG0870	DNA polymerase epsilon, subunit D
Q3T0V7	Endothelial differentiation-related factor 1 OS=Bos taurus OX=9913 GN=EDF1 PE=2 SV=1	EDF1	0.643464	Down	16.3687	37520.1	24142.8	1.21694	0.783058	mitochondria	K03627	MBF1; putative transcription factor		GO:0003158 endothelium development; GO:0006355 regulation of transcription, DNA-templated; GO:0006357 regulation of transcription by RNA polymerase II; GO:0007275 multicellular organism development; GO:0007399 nervous system development; GO:0007417 central nervous system development; GO:0007424 open tracheal system development; GO:0009888 tissue development; GO:0009889 regulation of biosynthetic …	GO:0005622 intracellular anatomical structure; GO:0005634 nucleus; GO:0005730 nucleolus; GO:0005737 cytoplasm; GO:0005829 cytosol; GO:0031974 membrane-enclosed lumen; GO:0031981 nuclear lumen; GO:0043226 organelle; GO:0043227 membrane-bounded organelle; GO:0043228 non-membrane-bounded organelle; GO:0043229 intracellular organelle; GO:0043231 intracellular membrane-bounded organelle; GO:0043232 in…	GO:0003712 transcription coregulator activity; GO:0003713 transcription coactivator activity; GO:0005488 binding; GO:0005515 protein binding; GO:0030674 protein-macromolecule adaptor activity; GO:0060090 molecular adaptor activity; GO:0140110 transcription regulator activity;	PF01381	PF01381 Helix-turn-helix	K	KOG3398	Transcription factor MBF1
Q3T0W3	E3 ubiquitin-protein ligase RNF181 OS=Bos taurus OX=9913 GN=RNF181 PE=2 SV=1	RNF181	3.06951	Up	17.9493	3027.92	9294.24	0.49146	1.50854	extracellular	K22378	RNF181; E3 ubiquitin-protein ligase RNF181 [EC:2.3.2.27]		GO:0000209 protein polyubiquitination; GO:0006464 cellular protein modification process; GO:0006508 proteolysis; GO:0006511 ubiquitin-dependent protein catabolic process; GO:0006807 nitrogen compound metabolic process; GO:0008152 metabolic process; GO:0009056 catabolic process; GO:0009057 macromolecule catabolic process; GO:0009987 cellular process; GO:0010498 proteasomal protein catabolic proces…		GO:0003824 catalytic activity; GO:0004842 ubiquitin-protein transferase activity; GO:0016740 transferase activity; GO:0019787 ubiquitin-like protein transferase activity; GO:0061630 ubiquitin protein ligase activity; GO:0061659 ubiquitin-like protein ligase activity; GO:0140096 catalytic activity, acting on a protein;	PF13639	PF13639 Ring finger domain	O	KOG0800	FOG: Predicted E3 ubiquitin ligase
Q3ZBG9	Phospholipid scramblase 2 OS=Bos taurus OX=9913 GN=PLSCR2 PE=2 SV=1	PLSCR2	0.530013	Down	32.5767	57831.8	30651.6	1.30718	0.692821	cytoplasm				GO:0001775 cell activation; GO:0002237 response to molecule of bacterial origin; GO:0002252 immune effector process; GO:0002376 immune system process; GO:0002520 immune system development; GO:0002526 acute inflammatory response; GO:0002682 regulation of immune system process; GO:0002684 positive regulation of immune system process; GO:0002694 regulation of leukocyte activation; GO:0006139 nucleob…	GO:0005576 extracellular region; GO:0005622 intracellular anatomical structure; GO:0005634 nucleus; GO:0005730 nucleolus; GO:0005737 cytoplasm; GO:0005794 Golgi apparatus; GO:0005829 cytosol; GO:0005886 plasma membrane; GO:0005887 integral component of plasma membrane; GO:0012505 endomembrane system; GO:0016020 membrane; GO:0016021 integral component of membrane; GO:0031012 extracellular matrix; …	GO:0000981 DNA-binding transcription factor activity, RNA polymerase II-specific; GO:0001228 DNA-binding transcription activator activity, RNA polymerase II-specific; GO:0003700 DNA-binding transcription factor activity; GO:0005102 signaling receptor binding; GO:0005154 epidermal growth factor receptor binding; GO:0005215 transporter activity; GO:0005319 lipid transporter activity; GO:0005488 bin…	PF03803	PF03803 Scramblase	M	KOG0621	Phospholipid scramblase
Q3ZC71	Dolichol-phosphate mannosyltransferase subunit 3 OS=Bos taurus OX=9913 GN=DPM3 PE=3 SV=1	DPM3	1.90224	Up	10.1418	35405.2	67349.1	0.689124	1.31088	extracellular	K09659	DPM3; dolichol-phosphate mannosyltransferase subunit 3	map00510 N-Glycan biosynthesis; map01100 Metabolic pathways	GO:0005975 carbohydrate metabolic process; GO:0006464 cellular protein modification process; GO:0006486 protein glycosylation; GO:0006493 protein O-linked glycosylation; GO:0006497 protein lipidation; GO:0006505 GPI anchor metabolic process; GO:0006506 GPI anchor biosynthetic process; GO:0006629 lipid metabolic process; GO:0006643 membrane lipid metabolic process; GO:0006644 phospholipid metaboli…	GO:0005622 intracellular anatomical structure; GO:0005737 cytoplasm; GO:0005783 endoplasmic reticulum; GO:0005789 endoplasmic reticulum membrane; GO:0012505 endomembrane system; GO:0016020 membrane; GO:0016021 integral component of membrane; GO:0030176 integral component of endoplasmic reticulum membrane; GO:0031224 intrinsic component of membrane; GO:0031227 intrinsic component of endoplasmic re…				OT	KOG4841	Dolichol-phosphate mannosyltransferase, subunit 3
Q58D55	Beta-galactosidase OS=Bos taurus OX=9913 GN=GLB1 PE=2 SV=1	GLB1	0.619547	Down	73.4132	182290	112937	1.23491	0.765087	endoplasmic reticulum	K12309	GLB1, ELNR1; beta-galactosidase [EC:3.2.1.23]	map00052 Galactose metabolism; map00511 Other glycan degradation; map00531 Glycosaminoglycan degradation; map00600 Sphingolipid metabolism; map00604 Glycosphingolipid biosynthesis - ganglio series; map01100 Metabolic pathways; map04142 Lysosome	GO:0001775 cell activation; GO:0002252 immune effector process; GO:0002263 cell activation involved in immune response; GO:0002274 myeloid leukocyte activation; GO:0002275 myeloid cell activation involved in immune response; GO:0002283 neutrophil activation involved in immune response; GO:0002366 leukocyte activation involved in immune response; GO:0002376 immune system process; GO:0002443 leukoc…	GO:0000323 lytic vacuole; GO:0005576 extracellular region; GO:0005615 extracellular space; GO:0005622 intracellular anatomical structure; GO:0005737 cytoplasm; GO:0005764 lysosome; GO:0005766 primary lysosome; GO:0005773 vacuole; GO:0005775 vacuolar lumen; GO:0005794 Golgi apparatus; GO:0012505 endomembrane system; GO:0030141 secretory granule; GO:0031410 cytoplasmic vesicle; GO:0031974 membrane-…	GO:0003824 catalytic activity; GO:0004308 exo-alpha-sialidase activity; GO:0004553 hydrolase activity, hydrolyzing O-glycosyl compounds; GO:0004565 beta-galactosidase activity; GO:0005488 binding; GO:0005515 protein binding; GO:0015925 galactosidase activity; GO:0016787 hydrolase activity; GO:0016798 hydrolase activity, acting on glycosyl bonds; GO:0016936 galactoside binding; GO:0016997 alpha-si…	PF01301; PF13364	PF01301 Glycosyl hydrolases family 35; PF13364 Beta-galactosidase jelly roll domain	G	KOG0496	Beta-galactosidase
Q5E950	H/ACA ribonucleoprotein complex subunit 2 OS=Bos taurus OX=9913 GN=NHP2 PE=2 SV=1	NHP2	1.87024	Up	17.1971	6351.51	11878.8	0.696806	1.30319	cytoplasm	K11129	NHP2, NOLA2; H/ACA ribonucleoprotein complex subunit 2	map03008 Ribosome biogenesis in eukaryotes	GO:0000154 rRNA modification; GO:0000469 cleavage involved in rRNA processing; GO:0000470 maturation of LSU-rRNA; GO:0000723 telomere maintenance; GO:0001522 pseudouridine synthesis; GO:0006139 nucleobase-containing compound metabolic process; GO:0006259 DNA metabolic process; GO:0006278 RNA-dependent DNA biosynthetic process; GO:0006364 rRNA processing; GO:0006396 RNA processing; GO:0006412 tran…	GO:0005622 intracellular anatomical structure; GO:0005634 nucleus; GO:0005654 nucleoplasm; GO:0005697 telomerase holoenzyme complex; GO:0005730 nucleolus; GO:0005732 sno(s)RNA-containing ribonucleoprotein complex; GO:0015030 Cajal body; GO:0016604 nuclear body; GO:0031429 box H/ACA snoRNP complex; GO:0031974 membrane-enclosed lumen; GO:0031981 nuclear lumen; GO:0032991 protein-containing complex;…	GO:0003676 nucleic acid binding; GO:0003723 RNA binding; GO:0005488 binding; GO:0030515 snoRNA binding; GO:0034513 box H/ACA snoRNA binding; GO:0070034 telomerase RNA binding; GO:0097159 organic cyclic compound binding; GO:1901363 heterocyclic compound binding;	PF01248	PF01248 Ribosomal protein L7Ae/L30e/S12e/Gadd45 family	A	KOG3167	Box H/ACA snoRNP component, involved in ribosomal RNA pseudouridinylation
Q5E9T1	GDP-D-glucose phosphorylase 1 OS=Bos taurus OX=9913 GN=GDPGP1 PE=2 SV=1	GDPGP1	1.57894	Up	42.3325	18119.8	28610.1	0.775513	1.22449	cytoplasm	K15630	VTC2; GDP-D-glucose phosphorylase [EC:2.7.7.78]		GO:0005975 carbohydrate metabolic process; GO:0005996 monosaccharide metabolic process; GO:0006006 glucose metabolic process; GO:0008152 metabolic process; GO:0019318 hexose metabolic process; GO:0044238 primary metabolic process; GO:0044281 small molecule metabolic process; GO:0071704 organic substance metabolic process;	GO:0005622 intracellular anatomical structure; GO:0005737 cytoplasm;	GO:0003824 catalytic activity; GO:0004645 1,4-alpha-oligoglucan phosphorylase activity; GO:0016740 transferase activity; GO:0016757 glycosyltransferase activity; GO:0016758 hexosyltransferase activity; GO:0080048 GDP-D-glucose phosphorylase activity;			R	KOG2720	Predicted hydrolase (HIT family)
Q5E9V3	Myozenin-2 OS=Bos taurus OX=9913 GN=MYOZ2 PE=2 SV=1	MYOZ2	0.528076	Down	30.1512	80661	42595.1	1.30884	0.691165	cytoplasm				GO:0006996 organelle organization; GO:0007010 cytoskeleton organization; GO:0009653 anatomical structure morphogenesis; GO:0009987 cellular process; GO:0010927 cellular component assembly involved in morphogenesis; GO:0016043 cellular component organization; GO:0022607 cellular component assembly; GO:0030029 actin filament-based process; GO:0030036 actin cytoskeleton organization; GO:0030154 cell…	GO:0005622 intracellular anatomical structure; GO:0005737 cytoplasm; GO:0005856 cytoskeleton; GO:0015629 actin cytoskeleton; GO:0030016 myofibril; GO:0030017 sarcomere; GO:0030018 Z disc; GO:0031674 I band; GO:0043226 organelle; GO:0043228 non-membrane-bounded organelle; GO:0043229 intracellular organelle; GO:0043232 intracellular non-membrane-bounded organelle; GO:0043292 contractile fiber; GO:0…	GO:0003779 actin binding; GO:0005488 binding; GO:0005515 protein binding; GO:0008092 cytoskeletal protein binding; GO:0019899 enzyme binding; GO:0019902 phosphatase binding; GO:0019903 protein phosphatase binding; GO:0030346 protein phosphatase 2B binding; GO:0031433 telethonin binding; GO:0051373 FATZ binding;
Q5EAD5	Geranylgeranyl transferase type-1 subunit beta OS=Bos taurus OX=9913 GN=PGGT1B PE=2 SV=1	PGGT1B	0.608113	Down	42.4813	73850.7	44909.5	1.24369	0.756306	cytoplasm	K11713	PGTB1; geranylgeranyl transferase type-1 subunit beta [EC:2.5.1.59]		GO:0006464 cellular protein modification process; GO:0006807 nitrogen compound metabolic process; GO:0007275 multicellular organism development; GO:0007507 heart development; GO:0008152 metabolic process; GO:0008284 positive regulation of cell population proliferation; GO:0009790 embryo development; GO:0009888 tissue development; GO:0009889 regulation of biosynthetic process; GO:0009890 negative …	GO:0005622 intracellular anatomical structure; GO:0005953 CAAX-protein geranylgeranyltransferase complex; GO:0032991 protein-containing complex; GO:1902494 catalytic complex; GO:1990234 transferase complex;	GO:0003824 catalytic activity; GO:0004659 prenyltransferase activity; GO:0004661 protein geranylgeranyltransferase activity; GO:0004662 CAAX-protein geranylgeranyltransferase activity; GO:0005488 binding; GO:0005515 protein binding; GO:0008270 zinc ion binding; GO:0008318 protein prenyltransferase activity; GO:0016740 transferase activity; GO:0016765 transferase activity, transferring alkyl or ar…			O	KOG0367	Protein geranylgeranyltransferase Type I, beta subunit
Q6IE76	Squalene synthase OS=Bos taurus OX=9913 GN=FDFT1 PE=2 SV=1	FDFT1	1.52258	Up	48.2935	21823.3	33227.9	0.792838	1.20716	cytoplasm	K00801	FDFT1; farnesyl-diphosphate farnesyltransferase [EC:2.5.1.21]	map00100 Steroid biosynthesis; map01100 Metabolic pathways	GO:0006066 alcohol metabolic process; GO:0006629 lipid metabolic process; GO:0006644 phospholipid metabolic process; GO:0006694 steroid biosynthetic process; GO:0006695 cholesterol biosynthetic process; GO:0006720 isoprenoid metabolic process; GO:0006721 terpenoid metabolic process; GO:0006793 phosphorus metabolic process; GO:0006796 phosphate-containing compound metabolic process; GO:0008152 met…	GO:0005622 intracellular anatomical structure; GO:0005737 cytoplasm; GO:0005783 endoplasmic reticulum; GO:0005789 endoplasmic reticulum membrane; GO:0012505 endomembrane system; GO:0016020 membrane; GO:0016021 integral component of membrane; GO:0031224 intrinsic component of membrane; GO:0031984 organelle subcompartment; GO:0042175 nuclear outer membrane-endoplasmic reticulum membrane network; GO…	GO:0003824 catalytic activity; GO:0004310 farnesyl-diphosphate farnesyltransferase activity; GO:0004311 farnesyltranstransferase activity; GO:0004659 prenyltransferase activity; GO:0016740 transferase activity; GO:0016765 transferase activity, transferring alkyl or aryl (other than methyl) groups; GO:0051996 squalene synthase activity;	PF00494	PF00494 Squalene/phytoene synthase	I	KOG1459	Squalene synthetase
A0A140T8A7	Pseudouridylate synthase RPUSD4, mitochondrial OS=Bos taurus OX=9913 GN=RPUSD4 PE=4 SV=1	RPUSD4	1.60077	Up	42.0562	8432.59	13498.6	0.769004	1.231	cytoplasm	K22538	RPUSD4; mitochondrial RNA pseudouridine synthase RPUSD4 [EC:5.4.99.-]		GO:0001522 pseudouridine synthesis; GO:0006139 nucleobase-containing compound metabolic process; GO:0006396 RNA processing; GO:0006399 tRNA metabolic process; GO:0006400 tRNA modification; GO:0006417 regulation of translation; GO:0006725 cellular aromatic compound metabolic process; GO:0006807 nitrogen compound metabolic process; GO:0008033 tRNA processing; GO:0008152 metabolic process; GO:000945…	GO:0005622 intracellular anatomical structure; GO:0005737 cytoplasm; GO:0005739 mitochondrion; GO:0043226 organelle; GO:0043227 membrane-bounded organelle; GO:0043229 intracellular organelle; GO:0043231 intracellular membrane-bounded organelle;	GO:0003824 catalytic activity; GO:0009982 pseudouridine synthase activity; GO:0016853 isomerase activity; GO:0016866 intramolecular transferase activity;			A	KOG1919	RNA pseudouridylate synthases
A0A140T8C4	OCIA domain-containing protein 1 OS=Bos taurus OX=9913 GN=OCIAD1 PE=3 SV=1	OCIAD1	1.80496	Up	27.8592	29311.7	52906.4	0.713023	1.28698	nucleus				GO:0045595 regulation of cell differentiation; GO:0050789 regulation of biological process; GO:0050793 regulation of developmental process; GO:0050794 regulation of cellular process; GO:0065007 biological regulation; GO:2000736 regulation of stem cell differentiation;	GO:0005622 intracellular anatomical structure; GO:0005737 cytoplasm; GO:0005768 endosome; GO:0012505 endomembrane system; GO:0031410 cytoplasmic vesicle; GO:0031982 vesicle; GO:0043226 organelle; GO:0043227 membrane-bounded organelle; GO:0043229 intracellular organelle; GO:0097708 intracellular vesicle;
A0A3Q1LG54	Protein phosphatase 1 regulatory subunit 21 OS=Bos taurus OX=9913 GN=PPP1R21 PE=4 SV=1	PPP1R21	1.67426	Up	88.9233	28013.1	46901.4	0.747869	1.25213	nucleus	K17562	PPP1R21, CCDC128, KLRAQ1; protein phosphatase 1 regulatory subunit 21		GO:0007154 cell communication; GO:0007165 signal transduction; GO:0007264 small GTPase mediated signal transduction; GO:0007265 Ras protein signal transduction; GO:0009987 cellular process; GO:0023052 signaling; GO:0032482 Rab protein signal transduction; GO:0035556 intracellular signal transduction; GO:0050789 regulation of biological process; GO:0050794 regulation of cellular process; GO:005089…	GO:0005622 intracellular anatomical structure; GO:0005737 cytoplasm; GO:0005768 endosome; GO:0005769 early endosome; GO:0012505 endomembrane system; GO:0031410 cytoplasmic vesicle; GO:0031982 vesicle; GO:0043226 organelle; GO:0043227 membrane-bounded organelle; GO:0043229 intracellular organelle; GO:0097708 intracellular vesicle;	GO:0005488 binding; GO:0005515 protein binding; GO:0019899 enzyme binding; GO:0031267 small GTPase binding; GO:0051020 GTPase binding;			S	KOG4421	Uncharacterized conserved protein
A0A3Q1LH49	Arf-GAP with coiled-coil, ANK repeat and PH domain-containing protein OS=Bos taurus OX=9913 GN=ACAP2 PE=4 SV=1	ACAP2	0.600191	Down	31.5943	11043.3	6628.08	1.24985	0.750149	cytoplasm	K12489	ACAP; Arf-GAP with coiled-coil, ANK repeat and PH domain-containing protein	map04144 Endocytosis	GO:0000902 cell morphogenesis; GO:0001932 regulation of protein phosphorylation; GO:0001933 negative regulation of protein phosphorylation; GO:0006469 negative regulation of protein kinase activity; GO:0006915 apoptotic process; GO:0008104 protein localization; GO:0008219 cell death; GO:0009653 anatomical structure morphogenesis; GO:0009719 response to endogenous stimulus; GO:0009889 regulation o…	GO:0001726 ruffle; GO:0005622 intracellular anatomical structure; GO:0005737 cytoplasm; GO:0005768 endosome; GO:0005769 early endosome; GO:0005886 plasma membrane; GO:0009898 cytoplasmic side of plasma membrane; GO:0010008 endosome membrane; GO:0012505 endomembrane system; GO:0016020 membrane; GO:0016323 basolateral plasma membrane; GO:0016324 apical plasma membrane; GO:0031090 organelle membrane…	GO:0005096 GTPase activator activity; GO:0005488 binding; GO:0005515 protein binding; GO:0005543 phospholipid binding; GO:0005546 phosphatidylinositol-4,5-bisphosphate binding; GO:0005547 phosphatidylinositol-3,4,5-trisphosphate binding; GO:0008047 enzyme activator activity; GO:0008289 lipid binding; GO:0019899 enzyme binding; GO:0030234 enzyme regulator activity; GO:0030695 GTPase regulator acti…	PF16746	PF16746 BAR domain of APPL family	T	KOG0521	Putative GTPase activating proteins (GAPs)
A0A3Q1LIV4	Cysteine protease OS=Bos taurus OX=9913 GN=ATG4A PE=3 SV=1	ATG4A	1.74408	Up	46.3055	13208.3	23036.3	0.728841	1.27116	cytoplasm,nucleus	K08342	ATG4; cysteine protease ATG4 [EC:3.4.22.-]	map04136 Autophagy - other; map04140 Autophagy - animal	GO:0000045 autophagosome assembly; GO:0000422 autophagy of mitochondrion; GO:0006464 cellular protein modification process; GO:0006497 protein lipidation; GO:0006501 C-terminal protein lipidation; GO:0006508 proteolysis; GO:0006605 protein targeting; GO:0006612 protein targeting to membrane; GO:0006807 nitrogen compound metabolic process; GO:0006810 transport; GO:0006886 intracellular protein tra…	GO:0005622 intracellular anatomical structure; GO:0005737 cytoplasm; GO:0005829 cytosol;	GO:0003824 catalytic activity; GO:0004175 endopeptidase activity; GO:0004197 cysteine-type endopeptidase activity; GO:0008233 peptidase activity; GO:0008234 cysteine-type peptidase activity; GO:0016787 hydrolase activity; GO:0140096 catalytic activity, acting on a protein;			ZU	KOG2674	Cysteine protease required for autophagy - Apg4p/Aut2p
A0A3Q1LJV4	Intraflagellar transport 81 OS=Bos taurus OX=9913 GN=IFT81 PE=4 SV=1	IFT81	0.5277	Down	81.9372	6751.37	3562.7	1.30916	0.690842	nucleus	K19677	IFT81; intraflagellar transport protein 81		GO:0000003 reproduction; GO:0003008 system process; GO:0006810 transport; GO:0006928 movement of cell or subcellular component; GO:0006935 chemotaxis; GO:0006996 organelle organization; GO:0007017 microtubule-based process; GO:0007018 microtubule-based movement; GO:0007276 gamete generation; GO:0007283 spermatogenesis; GO:0007600 sensory perception; GO:0008589 regulation of smoothened signaling p…	GO:0005622 intracellular anatomical structure; GO:0005813 centrosome; GO:0005815 microtubule organizing center; GO:0005856 cytoskeleton; GO:0005929 cilium; GO:0015630 microtubule cytoskeleton; GO:0030990 intraciliary transport particle; GO:0030992 intraciliary transport particle B; GO:0031514 motile cilium; GO:0032991 protein-containing complex; GO:0036064 ciliary basal body; GO:0036126 sperm fla…	GO:0005488 binding; GO:0005515 protein binding; GO:0008092 cytoskeletal protein binding; GO:0015631 tubulin binding;	PF18383	PF18383 Intraflagellar transport 81 calponin homology domain
A0A3Q1LL72	Nucleolar protein 10 OS=Bos taurus OX=9913 GN=NOL10 PE=3 SV=1	NOL10	0.533274	Down	95.3817	17689.1	9433.12	1.3044	0.695602	nucleus	K14788	NOL10, ENP2; ribosome biogenesis protein ENP2			GO:0005622 intracellular anatomical structure; GO:0005634 nucleus; GO:0005730 nucleolus; GO:0031974 membrane-enclosed lumen; GO:0031981 nuclear lumen; GO:0043226 organelle; GO:0043227 membrane-bounded organelle; GO:0043228 non-membrane-bounded organelle; GO:0043229 intracellular organelle; GO:0043231 intracellular membrane-bounded organelle; GO:0043232 intracellular non-membrane-bounded organelle…		PF08159	PF08159 NUC153 domain	R	KOG2321	WD40 repeat protein
A0A3Q1LLJ8	Spermatid-specific manchette-related protein 1 OS=Bos taurus OX=9913 GN=SMRP1 PE=3 SV=1	SMRP1	0.551874	Down	81.9043	11866.4	6548.76	1.28876	0.711236	plasma membrane	K24727	MYORG; myogenesis-regulating glycosidase [EC:3.2.1.-]		GO:0007275 multicellular organism development; GO:0007517 muscle organ development; GO:0007519 skeletal muscle tissue development; GO:0009888 tissue development; GO:0009966 regulation of signal transduction; GO:0009967 positive regulation of signal transduction; GO:0009987 cellular process; GO:0010646 regulation of cell communication; GO:0010647 positive regulation of cell communication; GO:00147…	GO:0005622 intracellular anatomical structure; GO:0005634 nucleus; GO:0005635 nuclear envelope; GO:0005737 cytoplasm; GO:0005783 endoplasmic reticulum; GO:0005789 endoplasmic reticulum membrane; GO:0012505 endomembrane system; GO:0016020 membrane; GO:0031090 organelle membrane; GO:0031965 nuclear membrane; GO:0031967 organelle envelope; GO:0031975 envelope; GO:0031984 organelle subcompartment; GO…				G	KOG1065	Maltase glucoamylase and related hydrolases, glycosyl hydrolase family 31
A0A3Q1LLP3	Transforming acidic coiled-coil containing protein 2 OS=Bos taurus OX=9913 GN=TACC2 PE=3 SV=1	TACC2	0.612706	Down	121.649	9734.92	5964.64	1.24015	0.759848	mitochondria	K14282	TACC2; transforming acidic coiled-coil-containing protein 2		GO:0000226 microtubule cytoskeleton organization; GO:0006810 transport; GO:0006996 organelle organization; GO:0007010 cytoskeleton organization; GO:0007017 microtubule-based process; GO:0007049 cell cycle; GO:0007051 spindle organization; GO:0007097 nuclear migration; GO:0007275 multicellular organism development; GO:0007399 nervous system development; GO:0007417 central nervous system developmen…	GO:0005622 intracellular anatomical structure; GO:0005634 nucleus; GO:0005654 nucleoplasm; GO:0005737 cytoplasm; GO:0005829 cytosol; GO:0005856 cytoskeleton; GO:0005886 plasma membrane; GO:0015630 microtubule cytoskeleton; GO:0016020 membrane; GO:0031974 membrane-enclosed lumen; GO:0031981 nuclear lumen; GO:0043226 organelle; GO:0043227 membrane-bounded organelle; GO:0043228 non-membrane-bounded …	GO:0005102 signaling receptor binding; GO:0005488 binding; GO:0005515 protein binding; GO:0008134 transcription factor binding; GO:0019904 protein domain specific binding; GO:0051427 hormone receptor binding;
A0A3Q1LLY1	NLR family pyrin domain containing 1 OS=Bos taurus OX=9913 GN=NLRP1 PE=3 SV=1	NLRP1	1.56362	Up	146.017	246878	386024	0.780146	1.21985	nucleus	K12798	NLRP1, CARD7; NACHT, LRR and PYD domains-containing protein 1	map04621 NOD-like receptor signaling pathway	GO:0001816 cytokine production; GO:0001817 regulation of cytokine production; GO:0001819 positive regulation of cytokine production; GO:0002791 regulation of peptide secretion; GO:0002793 positive regulation of peptide secretion; GO:0006807 nitrogen compound metabolic process; GO:0006915 apoptotic process; GO:0006919 activation of cysteine-type endopeptidase activity involved in apoptotic process…	GO:0005622 intracellular anatomical structure; GO:0005634 nucleus; GO:0005654 nucleoplasm; GO:0005737 cytoplasm; GO:0005829 cytosol; GO:0031974 membrane-enclosed lumen; GO:0031981 nuclear lumen; GO:0032991 protein-containing complex; GO:0036477 somatodendritic compartment; GO:0043025 neuronal cell body; GO:0043226 organelle; GO:0043227 membrane-bounded organelle; GO:0043229 intracellular organell…	GO:0000166 nucleotide binding; GO:0005488 binding; GO:0005515 protein binding; GO:0005524 ATP binding; GO:0008047 enzyme activator activity; GO:0008656 cysteine-type endopeptidase activator activity involved in apoptotic process; GO:0016504 peptidase activator activity; GO:0016505 peptidase activator activity involved in apoptotic process; GO:0017076 purine nucleotide binding; GO:0019899 enzyme b…	PF05729; PF17779; PF17776; PF00619	PF05729 NACHT domain; PF17779 NOD2 winged helix domain; PF17776 NLRC4 helical domain HD2; PF00619 Caspase recruitment domain
A0A3Q1LLZ9	Molybdenum cofactor biosynthesis protein 1 OS=Bos taurus OX=9913 GN=MOCS1 PE=3 SV=1	MOCS1	0.537387	Down	64.2264	511818	275044	1.30091	0.699091	mitochondria	K20967	MOCS1; GTP 3',8-cyclase / cyclic pyranopterin monophosphate synthase [EC:4.1.99.22 4.6.1.17]	map00790 Folate biosynthesis; map01100 Metabolic pathways; map01240 Biosynthesis of cofactors	GO:0006139 nucleobase-containing compound metabolic process; GO:0006163 purine nucleotide metabolic process; GO:0006725 cellular aromatic compound metabolic process; GO:0006753 nucleoside phosphate metabolic process; GO:0006777 Mo-molybdopterin cofactor biosynthetic process; GO:0006793 phosphorus metabolic process; GO:0006796 phosphate-containing compound metabolic process; GO:0006807 nitrogen co…	GO:0005622 intracellular anatomical structure; GO:0005634 nucleus; GO:0005737 cytoplasm; GO:0005829 cytosol; GO:0043226 organelle; GO:0043227 membrane-bounded organelle; GO:0043229 intracellular organelle; GO:0043231 intracellular membrane-bounded organelle;	GO:0003824 catalytic activity; GO:0005488 binding; GO:0016829 lyase activity; GO:0016830 carbon-carbon lyase activity; GO:0016849 phosphorus-oxygen lyase activity; GO:0051536 iron-sulfur cluster binding; GO:0051539 4 iron, 4 sulfur cluster binding; GO:0051540 metal cluster binding; GO:0061798 GTP 3',8'-cyclase activity; GO:0061799 cyclic pyranopterin monophosphate synthase activity;	PF04055; PF13353; PF06463	PF04055 Radical SAM superfamily; PF13353 4Fe-4S single cluster domain; PF06463 Molybdenum Cofactor Synthesis C	H	KOG2876	Molybdenum cofactor biosynthesis pathway protein
A0A3Q1LM14	Selenoprotein O OS=Bos taurus OX=9913 GN=SELENOO PE=3 SV=1	SELENOO	0.658135	Down	77.452	27987.3	18419.4	1.20617	0.793826	mitochondria	K08997	SELENOO, selO; serine/tyrosine/threonine adenylyltransferase [EC:2.7.7.-]			GO:0005622 intracellular anatomical structure; GO:0005737 cytoplasm; GO:0005739 mitochondrion; GO:0043226 organelle; GO:0043227 membrane-bounded organelle; GO:0043229 intracellular organelle; GO:0043231 intracellular membrane-bounded organelle;				S	KOG2542	Uncharacterized conserved protein (YdiU family)
A0A3Q1LM90	Phospholipid-transporting ATPase OS=Bos taurus OX=9913 GN=ATP11B PE=3 SV=1	ATP11B	1.63163	Up	113.877	23783.8	38806.5	0.759984	1.24002	plasma membrane	K01530	E7.6.2.1; phospholipid-translocating ATPase [EC:7.6.2.1]		GO:0001775 cell activation; GO:0002252 immune effector process; GO:0002263 cell activation involved in immune response; GO:0002274 myeloid leukocyte activation; GO:0002275 myeloid cell activation involved in immune response; GO:0002283 neutrophil activation involved in immune response; GO:0002366 leukocyte activation involved in immune response; GO:0002376 immune system process; GO:0002443 leukoc…	GO:0000323 lytic vacuole; GO:0005622 intracellular anatomical structure; GO:0005634 nucleus; GO:0005635 nuclear envelope; GO:0005637 nuclear inner membrane; GO:0005737 cytoplasm; GO:0005764 lysosome; GO:0005765 lysosomal membrane; GO:0005766 primary lysosome; GO:0005768 endosome; GO:0005773 vacuole; GO:0005774 vacuolar membrane; GO:0005783 endoplasmic reticulum; GO:0005886 plasma membrane; GO:001…	GO:0003824 catalytic activity; GO:0005215 transporter activity; GO:0005319 lipid transporter activity; GO:0005548 phospholipid transporter activity; GO:0015075 ion transmembrane transporter activity; GO:0016462 pyrophosphatase activity; GO:0016787 hydrolase activity; GO:0016817 hydrolase activity, acting on acid anhydrides; GO:0016818 hydrolase activity, acting on acid anhydrides, in phosphorus-c…	PF00702	PF00702 haloacid dehalogenase-like hydrolase	R	KOG0206	P-type ATPase
A0A3Q1LMQ5	[histone H3]-trimethyl-L-lysine(4) demethylase OS=Bos taurus OX=9913 GN=KDM5C PE=3 SV=1	KDM5C	1.53947	Up	169.137	23777.8	36605.1	0.787566	1.21243	cytoplasm,nucleus	K11446	KDM5, JARID1; [histone H3]-trimethyl-L-lysine4 demethylase [EC:1.14.11.67]		GO:0000003 reproduction; GO:0000122 negative regulation of transcription by RNA polymerase II; GO:0002164 larval development; GO:0003006 developmental process involved in reproduction; GO:0006325 chromatin organization; GO:0006355 regulation of transcription, DNA-templated; GO:0006357 regulation of transcription by RNA polymerase II; GO:0006464 cellular protein modification process; GO:0006473 pr…	GO:0000118 histone deacetylase complex; GO:0000228 nuclear chromosome; GO:0000785 chromatin; GO:0005622 intracellular anatomical structure; GO:0005634 nucleus; GO:0005654 nucleoplasm; GO:0005694 chromosome; GO:0005737 cytoplasm; GO:0005829 cytosol; GO:0031974 membrane-enclosed lumen; GO:0031981 nuclear lumen; GO:0032991 protein-containing complex; GO:0043226 organelle; GO:0043227 membrane-bounded…	GO:0000981 DNA-binding transcription factor activity, RNA polymerase II-specific; GO:0003700 DNA-binding transcription factor activity; GO:0003824 catalytic activity; GO:0005488 binding; GO:0005515 protein binding; GO:0008134 transcription factor binding; GO:0008270 zinc ion binding; GO:0032451 demethylase activity; GO:0032452 histone demethylase activity; GO:0032453 histone H3-methyl-lysine-4 de…	PF01388; PF00628; PF02373; PF02928	PF01388 ARID/BRIGHT DNA binding domain; PF00628 PHD-finger; PF02373 JmjC domain, hydroxylase; PF02928 C5HC2 zinc finger	R	KOG1246	DNA-binding protein jumonji/RBP2/SMCY, contains JmjC domain
A0A3Q1LNA9	Serine/threonine-protein kinase PAK 3 OS=Bos taurus OX=9913 GN=PAK3 PE=4 SV=1	PAK3	1.74292	Up	62.2675	6030.39	10510.5	0.72915	1.27085	nucleus	K05733	PAK3, MRX30; p21-activated kinase 3 [EC:2.7.11.1]	map04012 ErbB signaling pathway; map04014 Ras signaling pathway; map04360 Axon guidance; map04510 Focal adhesion; map04660 T cell receptor signaling pathway; map04810 Regulation of actin cytoskeleton	GO:0000003 reproduction; GO:0000165 MAPK cascade; GO:0000902 cell morphogenesis; GO:0000904 cell morphogenesis involved in differentiation; GO:0001700 embryonic development via the syncytial blastoderm; GO:0001932 regulation of protein phosphorylation; GO:0001934 positive regulation of protein phosphorylation; GO:0002009 morphogenesis of an epithelium; GO:0002119 nematode larval development; GO:0…	GO:0005622 intracellular anatomical structure; GO:0005737 cytoplasm; GO:0005768 endosome; GO:0005829 cytosol; GO:0005856 cytoskeleton; GO:0005886 plasma membrane; GO:0012505 endomembrane system; GO:0016020 membrane; GO:0016021 integral component of membrane; GO:0016328 lateral plasma membrane; GO:0030054 cell junction; GO:0030055 cell-substrate junction; GO:0030056 hemidesmosome; GO:0030424 axon;…	GO:0000166 nucleotide binding; GO:0001882 nucleoside binding; GO:0001883 purine nucleoside binding; GO:0003824 catalytic activity; GO:0004672 protein kinase activity; GO:0004674 protein serine/threonine kinase activity; GO:0004708 MAP kinase kinase activity; GO:0004712 protein serine/threonine/tyrosine kinase activity; GO:0005488 binding; GO:0005515 protein binding; GO:0005525 GTP binding; GO:001…	PF00786; PF00069	PF00786 P21-Rho-binding domain; PF00069 Protein kinase domain	T	KOG0578	p21-activated serine/threonine protein kinase
A0A3Q1LNE5	Receptor for retinol uptake STRA6 OS=Bos taurus OX=9913 GN=STRA6 PE=4 SV=1	STRA6	1.6553	Up	80.406	33892.9	56103	0.753211	1.24679	plasma membrane	K23088	STRA6; vitamin A receptor/transporter (stra6) family protein		GO:0000003 reproduction; GO:0001101 response to acid chemical; GO:0001523 retinoid metabolic process; GO:0001568 blood vessel development; GO:0001654 eye development; GO:0001655 urogenital system development; GO:0001822 kidney development; GO:0001944 vasculature development; GO:0003006 developmental process involved in reproduction; GO:0003008 system process; GO:0003170 heart valve development; G…	GO:0005886 plasma membrane; GO:0005887 integral component of plasma membrane; GO:0016020 membrane; GO:0016021 integral component of membrane; GO:0031224 intrinsic component of membrane; GO:0031226 intrinsic component of plasma membrane; GO:0032991 protein-containing complex; GO:0071944 cell periphery;	GO:0005215 transporter activity; GO:0005319 lipid transporter activity; GO:0015318 inorganic molecular entity transmembrane transporter activity; GO:0015665 alcohol transmembrane transporter activity; GO:0022857 transmembrane transporter activity; GO:0034632 retinol transmembrane transporter activity; GO:0090482 vitamin transmembrane transporter activity; GO:1901618 organic hydroxy compound trans…
A0A3Q1LPD0	Euchromatic histone lysine methyltransferase 1 OS=Bos taurus OX=9913 GN=EHMT1 PE=4 SV=1	EHMT1	0.437863	Down	129.887	5802.61	2540.75	1.39095	0.609047	nucleus	K11420	EHMT; [histone H3]-lysine9 N-trimethyltransferase EHMT [EC:2.1.1.355]	map00310 Lysine degradation; map01100 Metabolic pathways; map04211 Longevity regulating pathway	GO:0000122 negative regulation of transcription by RNA polymerase II; GO:0002165 instar larval or pupal development; GO:0002682 regulation of immune system process; GO:0002697 regulation of immune effector process; GO:0002831 regulation of response to biotic stimulus; GO:0003008 system process; GO:0006139 nucleobase-containing compound metabolic process; GO:0006259 DNA metabolic process; GO:00063…	GO:0005622 intracellular anatomical structure; GO:0005634 nucleus; GO:0005654 nucleoplasm; GO:0005694 chromosome; GO:0005700 polytene chromosome; GO:0005705 polytene chromosome interband; GO:0016604 nuclear body; GO:0031974 membrane-enclosed lumen; GO:0031981 nuclear lumen; GO:0043226 organelle; GO:0043227 membrane-bounded organelle; GO:0043228 non-membrane-bounded organelle; GO:0043229 intracell…	GO:0002039 p53 binding; GO:0003824 catalytic activity; GO:0005488 binding; GO:0005515 protein binding; GO:0008168 methyltransferase activity; GO:0008170 N-methyltransferase activity; GO:0008276 protein methyltransferase activity; GO:0008757 S-adenosylmethionine-dependent methyltransferase activity; GO:0016278 lysine N-methyltransferase activity; GO:0016279 protein-lysine N-methyltransferase activ…			BK	KOG1082	Histone H3 (Lys9) methyltransferase SUV39H1/Clr4, required for transcriptional silencing
A0A3Q1LPS3	Fasciculation and elongation protein zeta 1 OS=Bos taurus OX=9913 GN=FEZ1 PE=3 SV=1	FEZ1	1.50664	Up	50.53	25882.5	38995.5	0.797881	1.20212	nucleus	K25663	FEZ1; fasciculation and elongation protein zeta-1		GO:0000902 cell morphogenesis; GO:0000904 cell morphogenesis involved in differentiation; GO:0006928 movement of cell or subcellular component; GO:0006935 chemotaxis; GO:0006996 organelle organization; GO:0007005 mitochondrion organization; GO:0007155 cell adhesion; GO:0007163 establishment or maintenance of cell polarity; GO:0007275 multicellular organism development; GO:0007399 nervous system d…	GO:0005622 intracellular anatomical structure; GO:0005737 cytoplasm; GO:0005794 Golgi apparatus; GO:0005813 centrosome; GO:0005815 microtubule organizing center; GO:0005856 cytoskeleton; GO:0005886 plasma membrane; GO:0012505 endomembrane system; GO:0015630 microtubule cytoskeleton; GO:0016020 membrane; GO:0030424 axon; GO:0030425 dendrite; GO:0030426 growth cone; GO:0030427 site of polarized gro…	GO:0005080 protein kinase C binding; GO:0005488 binding; GO:0005515 protein binding; GO:0008092 cytoskeletal protein binding; GO:0015631 tubulin binding; GO:0019899 enzyme binding; GO:0019900 kinase binding; GO:0019901 protein kinase binding; GO:0043015 gamma-tubulin binding; GO:0047485 protein N-terminus binding;			U	KOG3919	Kinesin-associated fasciculation and elongation protein involved in axonal transport
A0A3Q1LPX4	Hydroxymethylglutaryl-CoA synthase OS=Bos taurus OX=9913 GN=HMGCS1 PE=1 SV=1	HMGCS1	1.5241	Up	57.4719	44895.3	68424.9	0.792362	1.20764	cytoplasm	K01641	HMGCS; hydroxymethylglutaryl-CoA synthase [EC:2.3.3.10]	map00280 Valine, leucine and isoleucine degradation; map00650 Butanoate metabolism; map00900 Terpenoid backbone biosynthesis; map01100 Metabolic pathways; map03320 PPAR signaling pathway	GO:0000003 reproduction; GO:0001700 embryonic development via the syncytial blastoderm; GO:0001889 liver development; GO:0003006 developmental process involved in reproduction; GO:0006066 alcohol metabolic process; GO:0006629 lipid metabolic process; GO:0006694 steroid biosynthetic process; GO:0006695 cholesterol biosynthetic process; GO:0007275 multicellular organism development; GO:0007399 nerv…	GO:0005622 intracellular anatomical structure; GO:0005737 cytoplasm; GO:0005829 cytosol;	GO:0003824 catalytic activity; GO:0004421 hydroxymethylglutaryl-CoA synthase activity; GO:0005488 binding; GO:0005515 protein binding; GO:0016740 transferase activity; GO:0016746 acyltransferase activity; GO:0016853 isomerase activity; GO:0036094 small molecule binding; GO:0042802 identical protein binding; GO:0042803 protein homodimerization activity; GO:0043177 organic acid binding; GO:0046912 …	PF01154; PF08540	PF01154 Hydroxymethylglutaryl-coenzyme A synthase N terminal; PF08540 Hydroxymethylglutaryl-coenzyme A synthase C terminal	I	KOG1393	Hydroxymethylglutaryl-CoA synthase
A0A3Q1LQM1	CREB regulated transcription coactivator 1 OS=Bos taurus OX=9913 GN=CRTC1 PE=3 SV=1	CRTC1	1.63686	Up	69.6797	7821.31	12802.4	0.758478	1.24152	nucleus	K15309	CRTC1, TORC1; CREB-regulated transcription coactivator 1		GO:0003008 system process; GO:0006355 regulation of transcription, DNA-templated; GO:0006357 regulation of transcription by RNA polymerase II; GO:0006950 response to stress; GO:0006979 response to oxidative stress; GO:0007275 multicellular organism development; GO:0007399 nervous system development; GO:0007610 behavior; GO:0007611 learning or memory; GO:0007613 memory; GO:0009314 response to radi…	GO:0005622 intracellular anatomical structure; GO:0005634 nucleus; GO:0005654 nucleoplasm; GO:0005737 cytoplasm; GO:0005829 cytosol; GO:0005886 plasma membrane; GO:0016020 membrane; GO:0016604 nuclear body; GO:0031974 membrane-enclosed lumen; GO:0031981 nuclear lumen; GO:0036477 somatodendritic compartment; GO:0043025 neuronal cell body; GO:0043226 organelle; GO:0043227 membrane-bounded organelle…	GO:0005488 binding; GO:0005515 protein binding; GO:0008134 transcription factor binding; GO:0008140 cAMP response element binding protein binding;
A0A3Q1LS47	Gamma-tubulin complex component OS=Bos taurus OX=9913 GN=TUBGCP4 PE=3 SV=1	TUBGCP4	2.26124	Up	75.1482	9216	20839.6	0.613263	1.38674	extracellular	K16571	TUBGCP4, GCP4; gamma-tubulin complex component 4		GO:0000003 reproduction; GO:0000212 meiotic spindle organization; GO:0000226 microtubule cytoskeleton organization; GO:0000278 mitotic cell cycle; GO:0000280 nuclear division; GO:0000578 embryonic axis specification; GO:0000910 cytokinesis; GO:0003002 regionalization; GO:0003006 developmental process involved in reproduction; GO:0006403 RNA localization; GO:0006996 organelle organization; GO:0007…	GO:0000923 equatorial microtubule organizing center; GO:0000930 gamma-tubulin complex; GO:0000931 gamma-tubulin large complex; GO:0005622 intracellular anatomical structure; GO:0005737 cytoplasm; GO:0005768 endosome; GO:0005813 centrosome; GO:0005815 microtubule organizing center; GO:0005829 cytosol; GO:0005856 cytoskeleton; GO:0012505 endomembrane system; GO:0015630 microtubule cytoskeleton; GO:…	GO:0005198 structural molecule activity; GO:0005200 structural constituent of cytoskeleton; GO:0005488 binding; GO:0005515 protein binding; GO:0008092 cytoskeletal protein binding; GO:0015631 tubulin binding; GO:0043015 gamma-tubulin binding;	PF17681; PF04130	PF17681 Gamma tubulin complex component N-terminal; PF04130 Gamma tubulin complex component C-terminal	Z	KOG2065	Gamma-tubulin ring complex protein
A0A3Q1LSF1	Erlin OS=Bos taurus OX=9913 GN=ERLIN1 PE=3 SV=1	ERLIN1	0.528138	Down	35.4949	37316.4	19708.2	1.30878	0.691218	endoplasmic reticulum	K23341	ERLIN; erlin		GO:0006355 regulation of transcription, DNA-templated; GO:0006357 regulation of transcription by RNA polymerase II; GO:0006508 proteolysis; GO:0006511 ubiquitin-dependent protein catabolic process; GO:0006807 nitrogen compound metabolic process; GO:0006810 transport; GO:0006950 response to stress; GO:0006984 ER-nucleus signaling pathway; GO:0006991 response to sterol depletion; GO:0007154 cell co…	GO:0005622 intracellular anatomical structure; GO:0005737 cytoplasm; GO:0005783 endoplasmic reticulum; GO:0005789 endoplasmic reticulum membrane; GO:0012505 endomembrane system; GO:0016020 membrane; GO:0031984 organelle subcompartment; GO:0032991 protein-containing complex; GO:0042175 nuclear outer membrane-endoplasmic reticulum membrane network; GO:0043226 organelle; GO:0043227 membrane-bounded …	GO:0005488 binding; GO:0005496 steroid binding; GO:0008289 lipid binding; GO:0015485 cholesterol binding; GO:0032934 sterol binding; GO:0036094 small molecule binding; GO:0043178 alcohol binding; GO:0097159 organic cyclic compound binding;			R	KOG2962	Prohibitin-related membrane protease subunits
A0A3Q1LT12	glutathione transferase OS=Bos taurus OX=9913 GN=GSTA4 PE=3 SV=1	GSTA4	1.70812	Up	35.0149	73795.1	126051	0.738521	1.26148	nucleus	K00799	GST, gst; glutathione S-transferase [EC:2.5.1.18]	map00480 Glutathione metabolism; map00980 Metabolism of xenobiotics by cytochrome P450; map00982 Drug metabolism - cytochrome P450; map00983 Drug metabolism - other enzymes; map01100 Metabolic pathways; map04212 Longevity regulating pathway - worm	GO:0006518 peptide metabolic process; GO:0006575 cellular modified amino acid metabolic process; GO:0006749 glutathione metabolic process; GO:0006790 sulfur compound metabolic process; GO:0006807 nitrogen compound metabolic process; GO:0008152 metabolic process; GO:0009987 cellular process; GO:0034641 cellular nitrogen compound metabolic process; GO:0043603 cellular amide metabolic process; GO:00…		GO:0003824 catalytic activity; GO:0004364 glutathione transferase activity; GO:0016740 transferase activity; GO:0016765 transferase activity, transferring alkyl or aryl (other than methyl) groups;	PF02798; PF14497	PF02798 Glutathione S-transferase, N-terminal domain; PF14497 Glutathione S-transferase, C-terminal domain	O	KOG1695	Glutathione S-transferase
A0A3Q1LT19	Ig-like domain-containing protein OS=Bos taurus OX=9913 PE=4 SV=1	--	1.53408	Up	13.8665	3397.83	5212.55	0.78924	1.21076	extracellular	K06554	IGLL1, IGLL, CD179b; immunoglobulin lambda-like polypeptide 1		GO:0002250 adaptive immune response; GO:0002252 immune effector process; GO:0002253 activation of immune response; GO:0002376 immune system process; GO:0002443 leukocyte mediated immunity; GO:0002449 lymphocyte mediated immunity; GO:0002455 humoral immune response mediated by circulating immunoglobulin; GO:0002460 adaptive immune response based on somatic recombination of immune receptors built f…	GO:0005576 extracellular region;		PF07654	PF07654 Immunoglobulin C1-set domain
A0A3Q1LT84	Poly [ADP-ribose] polymerase OS=Bos taurus OX=9913 GN=PARP16 PE=3 SV=1	PARP16	0.433077	Down	36.8074	5846.43	2531.95	1.3956	0.604401	cytoplasm	K00774	PARP16; poly [ADP-ribose] polymerase 16 [EC:2.4.2.30]		GO:0001932 regulation of protein phosphorylation; GO:0001934 positive regulation of protein phosphorylation; GO:0006139 nucleobase-containing compound metabolic process; GO:0006464 cellular protein modification process; GO:0006471 protein ADP-ribosylation; GO:0006725 cellular aromatic compound metabolic process; GO:0006753 nucleoside phosphate metabolic process; GO:0006793 phosphorus metabolic pr…	GO:0005622 intracellular anatomical structure; GO:0005634 nucleus; GO:0005635 nuclear envelope; GO:0005737 cytoplasm; GO:0005783 endoplasmic reticulum; GO:0005829 cytosol; GO:0012505 endomembrane system; GO:0031967 organelle envelope; GO:0031975 envelope; GO:0031984 organelle subcompartment; GO:0043226 organelle; GO:0043227 membrane-bounded organelle; GO:0043229 intracellular organelle; GO:004323…	GO:0003824 catalytic activity; GO:0003950 NAD+ ADP-ribosyltransferase activity; GO:0005488 binding; GO:0005515 protein binding; GO:0008047 enzyme activator activity; GO:0016740 transferase activity; GO:0016757 glycosyltransferase activity; GO:0016763 pentosyltransferase activity; GO:0019207 kinase regulator activity; GO:0019209 kinase activator activity; GO:0019887 protein kinase regulator activi…	PF18084	PF18084 ARTD15 N-terminal domain
A0A3Q1LTE2	TLE family member 4, transcriptional corepressor OS=Bos taurus OX=9913 GN=TLE4 PE=3 SV=1	TLE4	1.67668	Up	83.8935	1777.85	2980.88	0.747195	1.2528	nucleus	K04497	GRO, TLE; groucho	map04013 MAPK signaling pathway - fly; map04310 Wnt signaling pathway; map04330 Notch signaling pathway	GO:0000122 negative regulation of transcription by RNA polymerase II; GO:0006355 regulation of transcription, DNA-templated; GO:0006357 regulation of transcription by RNA polymerase II; GO:0007154 cell communication; GO:0007165 signal transduction; GO:0007166 cell surface receptor signaling pathway; GO:0007267 cell-cell signaling; GO:0009889 regulation of biosynthetic process; GO:0009890 negative…	GO:0005622 intracellular anatomical structure; GO:0005634 nucleus; GO:0005654 nucleoplasm; GO:0005667 transcription regulator complex; GO:0031974 membrane-enclosed lumen; GO:0031981 nuclear lumen; GO:0032991 protein-containing complex; GO:0043226 organelle; GO:0043227 membrane-bounded organelle; GO:0043229 intracellular organelle; GO:0043231 intracellular membrane-bounded organelle; GO:0043233 or…	GO:0000981 DNA-binding transcription factor activity, RNA polymerase II-specific; GO:0003682 chromatin binding; GO:0003700 DNA-binding transcription factor activity; GO:0003712 transcription coregulator activity; GO:0003714 transcription corepressor activity; GO:0005488 binding; GO:0005515 protein binding; GO:0008134 transcription factor binding; GO:0140110 transcription regulator activity;			B	KOG0639	Transducin-like enhancer of split protein (contains WD40 repeats)
A0A3Q1LTI4	Palmitoyltransferase OS=Bos taurus OX=9913 GN=ZDHHC17 PE=3 SV=1	ZDHHC17	0.421755	Down	69.2547	17621.2	7431.82	1.40671	0.593288	plasma membrane	K20032	ZDHHC13_17, HIP14; palmitoyltransferase ZDHHC13/17 [EC:2.3.1.225]		GO:0000003 reproduction; GO:0001505 regulation of neurotransmitter levels; GO:0002791 regulation of peptide secretion; GO:0002793 positive regulation of peptide secretion; GO:0006464 cellular protein modification process; GO:0006497 protein lipidation; GO:0006807 nitrogen compound metabolic process; GO:0006810 transport; GO:0006811 ion transport; GO:0006812 cation transport; GO:0006836 neurotrans…	GO:0000139 Golgi membrane; GO:0005622 intracellular anatomical structure; GO:0005737 cytoplasm; GO:0005794 Golgi apparatus; GO:0005798 Golgi-associated vesicle; GO:0008021 synaptic vesicle; GO:0012505 endomembrane system; GO:0016020 membrane; GO:0016234 inclusion body; GO:0016235 aggresome; GO:0030133 transport vesicle; GO:0030660 Golgi-associated vesicle membrane; GO:0031090 organelle membrane; …	GO:0003824 catalytic activity; GO:0005215 transporter activity; GO:0005488 binding; GO:0005515 protein binding; GO:0008324 cation transmembrane transporter activity; GO:0015075 ion transmembrane transporter activity; GO:0015095 magnesium ion transmembrane transporter activity; GO:0015318 inorganic molecular entity transmembrane transporter activity; GO:0016409 palmitoyltransferase activity; GO:00…			R	KOG0509	Ankyrin repeat and DHHC-type Zn-finger domain containing proteins
A0A3Q1LUK4	Farnesylated proteins-converting enzyme 2 OS=Bos taurus OX=9913 GN=RCE1 PE=3 SV=1	RCE1	0.318131	Down	31.8668	22620.1	7196.14	1.5173	0.4827	plasma membrane	K08658	RCE1, FACE2; prenyl protein peptidase [EC:3.4.22.-]	map00900 Terpenoid backbone biosynthesis	GO:0006464 cellular protein modification process; GO:0006508 proteolysis; GO:0006807 nitrogen compound metabolic process; GO:0008152 metabolic process; GO:0009987 cellular process; GO:0010467 gene expression; GO:0016485 protein processing; GO:0016579 protein deubiquitination; GO:0019538 protein metabolic process; GO:0036211 protein modification process; GO:0043170 macromolecule metabolic process;…	GO:0005622 intracellular anatomical structure; GO:0005737 cytoplasm; GO:0005783 endoplasmic reticulum; GO:0005789 endoplasmic reticulum membrane; GO:0005829 cytosol; GO:0005886 plasma membrane; GO:0005887 integral component of plasma membrane; GO:0012505 endomembrane system; GO:0016020 membrane; GO:0016021 integral component of membrane; GO:0030176 integral component of endoplasmic reticulum memb…	GO:0003824 catalytic activity; GO:0004175 endopeptidase activity; GO:0004197 cysteine-type endopeptidase activity; GO:0004222 metalloendopeptidase activity; GO:0008233 peptidase activity; GO:0008234 cysteine-type peptidase activity; GO:0008237 metallopeptidase activity; GO:0016787 hydrolase activity; GO:0140096 catalytic activity, acting on a protein;			O	KOG4130	Prenyl protein protease
A0A3Q1LUW4	A-kinase anchoring protein 13 OS=Bos taurus OX=9913 GN=AKAP13 PE=4 SV=1	AKAP13	0.489482	Down	297.575	10089	4938.39	1.34275	0.657251	nucleus	K16529	ARHGEF13; A-kinase anchor protein 13	map04928 Parathyroid hormone synthesis, secretion and action	GO:0001501 skeletal system development; GO:0001932 regulation of protein phosphorylation; GO:0001934 positive regulation of protein phosphorylation; GO:0003008 system process; GO:0003013 circulatory system process; GO:0003015 heart process; GO:0006810 transport; GO:0006913 nucleocytoplasmic transport; GO:0007154 cell communication; GO:0007165 signal transduction; GO:0007186 G protein-coupled rece…	GO:0005622 intracellular anatomical structure; GO:0005737 cytoplasm; GO:0005829 cytosol; GO:0005938 cell cortex; GO:0048471 perinuclear region of cytoplasm; GO:0071944 cell periphery; GO:0099568 cytoplasmic region;	GO:0005078 MAP-kinase scaffold activity; GO:0005085 guanyl-nucleotide exchange factor activity; GO:0005198 structural molecule activity; GO:0005488 binding; GO:0005515 protein binding; GO:0019899 enzyme binding; GO:0019900 kinase binding; GO:0031267 small GTPase binding; GO:0035591 signaling adaptor activity; GO:0051018 protein kinase A binding; GO:0051020 GTPase binding; GO:0060090 molecular ada…	PF00621; PF17838	PF00621 RhoGEF domain; PF17838 PH domain	T	KOG3520	Predicted guanine nucleotide exchange factor
A0A3Q1LVH9	SH3 and PX domains 2B OS=Bos taurus OX=9913 GN=SH3PXD2B PE=3 SV=1	SH3PXD2B	1.52271	Up	102.989	24573.2	37417.8	0.792799	1.2072	nucleus	K24032	SH3PXD2; SH3 and PX domain-containing protein 2					PF00787; PF00018; PF07653	PF00787 PX domain; PF00018 SH3 domain; PF07653 Variant SH3 domain	C	KOG4773	NADPH oxidase
A0A3Q1LVM3	WWC family member 3 OS=Bos taurus OX=9913 GN=WWC3 PE=4 SV=1	WWC3	0.340853	Down	124.584	20316.5	6924.93	1.49159	0.508413	nucleus				GO:0000003 reproduction; GO:0000122 negative regulation of transcription by RNA polymerase II; GO:0001654 eye development; GO:0001667 ameboidal-type cell migration; GO:0001745 compound eye morphogenesis; GO:0002064 epithelial cell development; GO:0002065 columnar/cuboidal epithelial cell differentiation; GO:0002066 columnar/cuboidal epithelial cell development; GO:0003006 developmental process in…	GO:0005622 intracellular anatomical structure; GO:0005737 cytoplasm; GO:0005829 cytosol; GO:0005886 plasma membrane; GO:0005911 cell-cell junction; GO:0005938 cell cortex; GO:0009898 cytoplasmic side of plasma membrane; GO:0016020 membrane; GO:0016324 apical plasma membrane; GO:0030054 cell junction; GO:0032991 protein-containing complex; GO:0036375 Kibra-Ex-Mer complex; GO:0045177 apical part of…	GO:0005198 structural molecule activity; GO:0005488 binding; GO:0005515 protein binding; GO:0019899 enzyme binding; GO:0019900 kinase binding;			R	KOG3209	WW domain-containing protein
A0A3Q1LW20	F-box only protein 9 OS=Bos taurus OX=9913 GN=FBXO9 PE=4 SV=1	FBXO9	2.5036	Up	49.7272	4610.97	11544	0.570842	1.42916	nucleus	K10295	FBXO9; F-box protein 9		GO:0000209 protein polyubiquitination; GO:0002376 immune system process; GO:0006464 cellular protein modification process; GO:0006508 proteolysis; GO:0006511 ubiquitin-dependent protein catabolic process; GO:0006807 nitrogen compound metabolic process; GO:0006950 response to stress; GO:0006952 defense response; GO:0006955 immune response; GO:0008152 metabolic process; GO:0009056 catabolic process…	GO:0000151 ubiquitin ligase complex; GO:0005622 intracellular anatomical structure; GO:0005737 cytoplasm; GO:0005829 cytosol; GO:0019005 SCF ubiquitin ligase complex; GO:0031461 cullin-RING ubiquitin ligase complex; GO:0032991 protein-containing complex; GO:1902494 catalytic complex; GO:1990234 transferase complex;	GO:0003824 catalytic activity; GO:0004842 ubiquitin-protein transferase activity; GO:0016740 transferase activity; GO:0019787 ubiquitin-like protein transferase activity; GO:0140096 catalytic activity, acting on a protein;	PF12937	PF12937 F-box-like	R	KOG2997	F-box protein FBX9
A0A3Q1LW29	Cytoplasmic dynein 1 intermediate chain 1 OS=Bos taurus OX=9913 GN=DYNC1I1 PE=3 SV=1	DYNC1I1	1.54139	Up	70.7708	16313.1	25144.9	0.786971	1.21303	nucleus	K10415	DYNC1I, DNCI; dynein cytoplasmic 1 intermediate chain	map04145 Phagosome; map04962 Vasopressin-regulated water reabsorption	GO:0000003 reproduction; GO:0000226 microtubule cytoskeleton organization; GO:0001654 eye development; GO:0001754 eye photoreceptor cell differentiation; GO:0002376 immune system process; GO:0002478 antigen processing and presentation of exogenous peptide antigen; GO:0002495 antigen processing and presentation of peptide antigen via MHC class II; GO:0002504 antigen processing and presentation of …	GO:0000775 chromosome, centromeric region; GO:0000776 kinetochore; GO:0000922 spindle pole; GO:0005622 intracellular anatomical structure; GO:0005634 nucleus; GO:0005694 chromosome; GO:0005737 cytoplasm; GO:0005768 endosome; GO:0005819 spindle; GO:0005829 cytosol; GO:0005856 cytoskeleton; GO:0005868 cytoplasmic dynein complex; GO:0005875 microtubule associated complex; GO:0005929 cilium; GO:00125…	GO:0003774 cytoskeletal motor activity; GO:0003777 microtubule motor activity; GO:0003824 catalytic activity; GO:0005488 binding; GO:0005515 protein binding; GO:0008017 microtubule binding; GO:0008092 cytoskeletal protein binding; GO:0015631 tubulin binding; GO:0016462 pyrophosphatase activity; GO:0016787 hydrolase activity; GO:0016817 hydrolase activity, acting on acid anhydrides; GO:0016818 hyd…			Z	KOG1587	Cytoplasmic dynein intermediate chain
A0A3Q1LWS9	High mobility group nucleosome binding domain 5 OS=Bos taurus OX=9913 GN=HMGN5 PE=1 SV=1	HMGN5	1.91218	Up	33.5647	55417.1	105968	0.68677	1.31323	nucleus	K17045	HMGN5; high-mobility group nucleosome-binding domain-containing protein 5		GO:0006325 chromatin organization; GO:0006355 regulation of transcription, DNA-templated; GO:0006357 regulation of transcription by RNA polymerase II; GO:0006518 peptide metabolic process; GO:0006575 cellular modified amino acid metabolic process; GO:0006749 glutathione metabolic process; GO:0006790 sulfur compound metabolic process; GO:0006807 nitrogen compound metabolic process; GO:0006996 orga…	GO:0005622 intracellular anatomical structure; GO:0005634 nucleus; GO:0005654 nucleoplasm; GO:0031974 membrane-enclosed lumen; GO:0031981 nuclear lumen; GO:0043226 organelle; GO:0043227 membrane-bounded organelle; GO:0043229 intracellular organelle; GO:0043231 intracellular membrane-bounded organelle; GO:0043233 organelle lumen; GO:0070013 intracellular organelle lumen;	GO:0003682 chromatin binding; GO:0005488 binding;
A0A3Q1LX29	DOP1 leucine zipper like protein A OS=Bos taurus OX=9913 GN=DOP1A PE=3 SV=1	DOP1A	0.292813	Down	278.718	7272.89	2129.6	1.54701	0.452985	plasma membrane				GO:0006810 transport; GO:0006892 post-Golgi vesicle-mediated transport; GO:0006895 Golgi to endosome transport; GO:0016192 vesicle-mediated transport; GO:0016482 cytosolic transport; GO:0046907 intracellular transport; GO:0048193 Golgi vesicle transport; GO:0051179 localization; GO:0051234 establishment of localization; GO:0051641 cellular localization; GO:0051649 establishment of localization in…	GO:0005622 intracellular anatomical structure; GO:0005737 cytoplasm; GO:0005768 endosome; GO:0005794 Golgi apparatus; GO:0005802 trans-Golgi network; GO:0012505 endomembrane system; GO:0031410 cytoplasmic vesicle; GO:0031982 vesicle; GO:0031984 organelle subcompartment; GO:0043226 organelle; GO:0043227 membrane-bounded organelle; GO:0043229 intracellular organelle; GO:0043231 intracellular membra…				K	KOG3613	Dopey and related predicted leucine zipper transcription factors
A0A3Q1M0U6	VPS37A subunit of ESCRT-I OS=Bos taurus OX=9913 GN=VPS37A PE=3 SV=1	VPS37A	0.568414	Down	44.0302	27975.9	15901.9	1.27517	0.724826	plasma membrane	K12185	VPS37; ESCRT-I complex subunit VPS37	map04144 Endocytosis	GO:0006508 proteolysis; GO:0006511 ubiquitin-dependent protein catabolic process; GO:0006807 nitrogen compound metabolic process; GO:0006810 transport; GO:0006914 autophagy; GO:0006996 organelle organization; GO:0007032 endosome organization; GO:0008152 metabolic process; GO:0009056 catabolic process; GO:0009057 macromolecule catabolic process; GO:0009987 cellular process; GO:0010256 endomembrane…	GO:0000813 ESCRT I complex; GO:0005622 intracellular anatomical structure; GO:0005634 nucleus; GO:0005654 nucleoplasm; GO:0005737 cytoplasm; GO:0005768 endosome; GO:0005770 late endosome; GO:0005813 centrosome; GO:0005815 microtubule organizing center; GO:0005829 cytosol; GO:0005856 cytoskeleton; GO:0010008 endosome membrane; GO:0012505 endomembrane system; GO:0015630 microtubule cytoskeleton; GO…		PF07200	PF07200 Modifier of rudimentary (Mod(r)) protein	S	KOG3270	Uncharacterized conserved protein
A0A3Q1M1V6	Fibulin-5 OS=Bos taurus OX=9913 GN=FBLN5 PE=3 SV=1	FBLN5	0.465926	Down	51.7503	27639.5	12877.9	1.36433	0.635675	extracellular	K17340	FBLN5; fibulin 5		GO:0001558 regulation of cell growth; GO:0006810 transport; GO:0007155 cell adhesion; GO:0007160 cell-matrix adhesion; GO:0008104 protein localization; GO:0009987 cellular process; GO:0016043 cellular component organization; GO:0019222 regulation of metabolic process; GO:0022607 cellular component assembly; GO:0022610 biological adhesion; GO:0030198 extracellular matrix organization; GO:0031323 r…	GO:0005576 extracellular region; GO:0005615 extracellular space; GO:0031012 extracellular matrix;	GO:0005102 signaling receptor binding; GO:0005178 integrin binding; GO:0005488 binding; GO:0005515 protein binding; GO:0008022 protein C-terminus binding; GO:0042802 identical protein binding; GO:0042803 protein homodimerization activity; GO:0044877 protein-containing complex binding; GO:0046983 protein dimerization activity; GO:0050839 cell adhesion molecule binding;	PF07645; PF12662	PF07645 Calcium-binding EGF domain; PF12662 Complement Clr-like EGF-like	T	KOG1217	Fibrillins and related proteins containing Ca2+-binding EGF-like domains
A0A3Q1M222	RNA-binding protein 42 OS=Bos taurus OX=9913 GN=RBM42 PE=3 SV=1	RBM42	2.50824	Up	50.1296	6230.85	15628.4	0.570087	1.42991	nucleus	K25079	RBM42; RNA-binding protein 42		GO:0000375 RNA splicing, via transesterification reactions; GO:0000377 RNA splicing, via transesterification reactions with bulged adenosine as nucleophile; GO:0000398 mRNA splicing, via spliceosome; GO:0001654 eye development; GO:0002088 lens development in camera-type eye; GO:0006139 nucleobase-containing compound metabolic process; GO:0006396 RNA processing; GO:0006397 mRNA processing; GO:0006…		GO:0003676 nucleic acid binding; GO:0003723 RNA binding; GO:0003729 mRNA binding; GO:0005488 binding; GO:0097159 organic cyclic compound binding; GO:1901363 heterocyclic compound binding;	PF00076	PF00076 RNA recognition motif. (a.k.a. RRM, RBD, or RNP domain)	R	KOG0226	RNA-binding proteins
A0A3Q1M2M3	Zinc finger protein 148 OS=Bos taurus OX=9913 GN=ZNF148 PE=4 SV=1	ZNF148	0.626433	Down	88.9731	9618.23	6025.17	1.22968	0.770315	nucleus	K24370	ZNF148; zinc finger protein 148		GO:0000003 reproduction; GO:0000122 negative regulation of transcription by RNA polymerase II; GO:0002376 immune system process; GO:0002520 immune system development; GO:0006139 nucleobase-containing compound metabolic process; GO:0006351 transcription, DNA-templated; GO:0006355 regulation of transcription, DNA-templated; GO:0006357 regulation of transcription by RNA polymerase II; GO:0006366 tra…	GO:0005622 intracellular anatomical structure; GO:0005634 nucleus; GO:0005737 cytoplasm; GO:0005794 Golgi apparatus; GO:0012505 endomembrane system; GO:0043226 organelle; GO:0043227 membrane-bounded organelle; GO:0043229 intracellular organelle; GO:0043231 intracellular membrane-bounded organelle;	GO:0000976 transcription cis-regulatory region binding; GO:0000977 RNA polymerase II transcription regulatory region sequence-specific DNA binding; GO:0000978 RNA polymerase II cis-regulatory region sequence-specific DNA binding; GO:0000981 DNA-binding transcription factor activity, RNA polymerase II-specific; GO:0000987 cis-regulatory region sequence-specific DNA binding; GO:0001067 transcriptio…	PF00096	PF00096 Zinc finger, C2H2 type	R	KOG1721	FOG: Zn-finger
A0A3Q1M456	Target of myb1 like 1 membrane trafficking protein OS=Bos taurus OX=9913 GN=TOM1L1 PE=3 SV=1	TOM1L1	1.80674	Up	53.8276	30932	55886.2	0.71257	1.28743	cytoplasm				GO:0001932 regulation of protein phosphorylation; GO:0001934 positive regulation of protein phosphorylation; GO:0006508 proteolysis; GO:0006511 ubiquitin-dependent protein catabolic process; GO:0006807 nitrogen compound metabolic process; GO:0007088 regulation of mitotic nuclear division; GO:0007154 cell communication; GO:0007165 signal transduction; GO:0007166 cell surface receptor signaling pat…	GO:0000323 lytic vacuole; GO:0005622 intracellular anatomical structure; GO:0005737 cytoplasm; GO:0005764 lysosome; GO:0005768 endosome; GO:0005773 vacuole; GO:0005829 cytosol; GO:0012505 endomembrane system; GO:0031410 cytoplasmic vesicle; GO:0031982 vesicle; GO:0043226 organelle; GO:0043227 membrane-bounded organelle; GO:0043229 intracellular organelle; GO:0043231 intracellular membrane-bounded…	GO:0005488 binding; GO:0005515 protein binding; GO:0008047 enzyme activator activity; GO:0019207 kinase regulator activity; GO:0019209 kinase activator activity; GO:0019887 protein kinase regulator activity; GO:0019899 enzyme binding; GO:0019900 kinase binding; GO:0019901 protein kinase binding; GO:0030234 enzyme regulator activity; GO:0030276 clathrin binding; GO:0030295 protein kinase activator…	PF00790; PF03127	PF00790 VHS domain; PF03127 GAT domain	U	KOG1087	Cytosolic sorting protein GGA2/TOM1
A0A3Q1M4C1	Abl interactor 2 OS=Bos taurus OX=9913 GN=ABI2 PE=3 SV=1	ABI2	1.53405	Up	55.6392	28960.1	44426.2	0.789251	1.21075	nucleus	K05751	ABI2; abl interactor 2	map04810 Regulation of actin cytoskeleton	GO:0000003 reproduction; GO:0000902 cell morphogenesis; GO:0000904 cell morphogenesis involved in differentiation; GO:0001654 eye development; GO:0001667 ameboidal-type cell migration; GO:0001736 establishment of planar polarity; GO:0001738 morphogenesis of a polarized epithelium; GO:0001764 neuron migration; GO:0001932 regulation of protein phosphorylation; GO:0001934 positive regulation of prot…	GO:0005622 intracellular anatomical structure; GO:0005737 cytoplasm; GO:0005829 cytosol; GO:0005886 plasma membrane; GO:0005911 cell-cell junction; GO:0005912 adherens junction; GO:0005938 cell cortex; GO:0016020 membrane; GO:0030027 lamellipodium; GO:0030054 cell junction; GO:0030175 filopodium; GO:0030424 axon; GO:0030425 dendrite; GO:0031209 SCAR complex; GO:0031252 cell leading edge; GO:00312…	GO:0003676 nucleic acid binding; GO:0003677 DNA binding; GO:0005488 binding; GO:0005515 protein binding; GO:0008092 cytoskeletal protein binding; GO:0008093 cytoskeletal anchor activity; GO:0017124 SH3 domain binding; GO:0019899 enzyme binding; GO:0019900 kinase binding; GO:0019901 protein kinase binding; GO:0019904 protein domain specific binding; GO:0030674 protein-macromolecule adaptor activit…	PF14604	PF14604 Variant SH3 domain	TZ	KOG2546	Abl interactor ABI-1, contains SH3 domain
A0A3Q1M6C3	AT-rich interaction domain 2 OS=Bos taurus OX=9913 GN=ARID2 PE=4 SV=1	ARID2	0.199131	Down	197.582	89760.1	17874	1.66787	0.332125	nucleus	K11765	ARID2; AT-rich interactive domain-containing protein 2		GO:0001568 blood vessel development; GO:0001944 vasculature development; GO:0002009 morphogenesis of an epithelium; GO:0002165 instar larval or pupal development; GO:0003007 heart morphogenesis; GO:0006325 chromatin organization; GO:0006333 chromatin assembly or disassembly; GO:0006337 nucleosome disassembly; GO:0006355 regulation of transcription, DNA-templated; GO:0006357 regulation of transcri…	GO:0000228 nuclear chromosome; GO:0000785 chromatin; GO:0005622 intracellular anatomical structure; GO:0005634 nucleus; GO:0005654 nucleoplasm; GO:0005667 transcription regulator complex; GO:0005694 chromosome; GO:0005700 polytene chromosome; GO:0005886 plasma membrane; GO:0016020 membrane; GO:0016586 RSC-type complex; GO:0031974 membrane-enclosed lumen; GO:0031981 nuclear lumen; GO:0032991 prote…	GO:0000981 DNA-binding transcription factor activity, RNA polymerase II-specific; GO:0003676 nucleic acid binding; GO:0003677 DNA binding; GO:0003700 DNA-binding transcription factor activity; GO:0005488 binding; GO:0005515 protein binding; GO:0008134 transcription factor binding; GO:0097159 organic cyclic compound binding; GO:0140110 transcription regulator activity; GO:1901363 heterocyclic comp…	PF01388; PF02257	PF01388 ARID/BRIGHT DNA binding domain; PF02257 RFX DNA-binding domain	K	KOG2744	DNA-binding proteins Bright/BRCAA1/RBP1 and related proteins containing BRIGHT domain
A0A3Q1M7A4	NF2, moesin-ezrin-radixin like (MERLIN) tumor suppressor OS=Bos taurus OX=9913 GN=NF2 PE=4 SV=1	NF2	1.76387	Up	69.1475	23717.4	41834.4	0.723624	1.27638	mitochondria	K16684	NF2; merlin	map04390 Hippo signaling pathway; map04391 Hippo signaling pathway - fly; map04392 Hippo signaling pathway - multiple species; map04530 Tight junction	GO:0000003 reproduction; GO:0000280 nuclear division; GO:0000578 embryonic axis specification; GO:0000910 cytokinesis; GO:0001558 regulation of cell growth; GO:0001654 eye development; GO:0001704 formation of primary germ layer; GO:0001707 mesoderm formation; GO:0001745 compound eye morphogenesis; GO:0001751 compound eye photoreceptor cell differentiation; GO:0001754 eye photoreceptor cell differ…	GO:0001726 ruffle; GO:0005622 intracellular anatomical structure; GO:0005634 nucleus; GO:0005730 nucleolus; GO:0005737 cytoplasm; GO:0005739 mitochondrion; GO:0005768 endosome; GO:0005769 early endosome; GO:0005829 cytosol; GO:0005856 cytoskeleton; GO:0005886 plasma membrane; GO:0005911 cell-cell junction; GO:0005912 adherens junction; GO:0005938 cell cortex; GO:0009898 cytoplasmic side of plasma…	GO:0005102 signaling receptor binding; GO:0005178 integrin binding; GO:0005488 binding; GO:0005515 protein binding; GO:0008013 beta-catenin binding; GO:0008092 cytoskeletal protein binding; GO:0019904 protein domain specific binding; GO:0044877 protein-containing complex binding; GO:0050839 cell adhesion molecule binding;	PF09379; PF00373; PF09380	PF09379 FERM N-terminal domain ; PF00373 FERM central domain; PF09380 FERM C-terminal PH-like domain	R	KOG3529	Radixin, moesin and related proteins of the ERM family
A0A3Q1M847	Maturin OS=Bos taurus OX=9913 GN=MTURN PE=3 SV=1	MTURN	1.67344	Up	30.6571	10568.1	17685.1	0.748099	1.2519	nucleus				GO:0007275 multicellular organism development; GO:0007399 nervous system development; GO:0009987 cellular process; GO:0022008 neurogenesis; GO:0030154 cell differentiation; GO:0030182 neuron differentiation; GO:0032501 multicellular organismal process; GO:0032502 developmental process; GO:0048468 cell development; GO:0048666 neuron development; GO:0048699 generation of neurons; GO:0048731 system …
A0A3Q1M864	GRB2 associated binding protein 2 OS=Bos taurus OX=9913 GN=GAB2 PE=3 SV=1	GAB2	0.654827	Down	74.2943	11287.1	7391.09	1.20859	0.791414	nucleus	K08091	GAB2; GRB2-associated-binding protein 2	map04014 Ras signaling pathway; map04071 Sphingolipid signaling pathway; map04072 Phospholipase D signaling pathway; map04380 Osteoclast differentiation; map04664 Fc epsilon RI signaling pathway; map04666 Fc gamma R-mediated phagocytosis	GO:0000902 cell morphogenesis; GO:0000904 cell morphogenesis involved in differentiation; GO:0002376 immune system process; GO:0002520 immune system development; GO:0002521 leukocyte differentiation; GO:0002573 myeloid leukocyte differentiation; GO:0002682 regulation of immune system process; GO:0002684 positive regulation of immune system process; GO:0002694 regulation of leukocyte activation; G…	GO:0005622 intracellular anatomical structure; GO:0005737 cytoplasm; GO:0005829 cytosol; GO:0005886 plasma membrane; GO:0016020 membrane; GO:0071944 cell periphery;	GO:0005068 transmembrane receptor protein tyrosine kinase adaptor activity; GO:0005102 signaling receptor binding; GO:0005488 binding; GO:0005515 protein binding; GO:0005543 phospholipid binding; GO:0005547 phosphatidylinositol-3,4,5-trisphosphate binding; GO:0008289 lipid binding; GO:0019899 enzyme binding; GO:0019900 kinase binding; GO:0019901 protein kinase binding; GO:0030674 protein-macromol…	PF00169	PF00169 PH domain
A0A3Q1MA43	Interferon induced transmembrane protein 1 (9-27) OS=Bos taurus OX=9913 GN=IFITM1 PE=3 SV=1	IFITM1	2.11618	Up	20.2305	10504.1	22228.5	0.641812	1.35819	mitochondria	K19831	IFITM1, CD225; interferon induced transmembrane protein 1	map04662 B cell receptor signaling pathway	GO:0002252 immune effector process; GO:0002376 immune system process; GO:0002682 regulation of immune system process; GO:0006810 transport; GO:0006897 endocytosis; GO:0006898 receptor-mediated endocytosis; GO:0006950 response to stress; GO:0006952 defense response; GO:0006955 immune response; GO:0007154 cell communication; GO:0007165 signal transduction; GO:0007166 cell surface receptor signaling…	GO:0000323 lytic vacuole; GO:0005622 intracellular anatomical structure; GO:0005634 nucleus; GO:0005737 cytoplasm; GO:0005764 lysosome; GO:0005765 lysosomal membrane; GO:0005768 endosome; GO:0005770 late endosome; GO:0005773 vacuole; GO:0005774 vacuolar membrane; GO:0005783 endoplasmic reticulum; GO:0005886 plasma membrane; GO:0009986 cell surface; GO:0010008 endosome membrane; GO:0012505 endomem…
A0A3Q1MAL2	Solute carrier family 41 member OS=Bos taurus OX=9913 GN=SLC41A1 PE=3 SV=1	SLC41A1	1.8179	Up	53.2814	7390.46	13435.1	0.709748	1.29025	plasma membrane	K15122	SLC41A; solute carrier family 41		GO:0006810 transport; GO:0006811 ion transport; GO:0006812 cation transport; GO:0006814 sodium ion transport; GO:0006873 cellular ion homeostasis; GO:0006875 cellular metal ion homeostasis; GO:0009987 cellular process; GO:0010035 response to inorganic substance; GO:0010038 response to metal ion; GO:0010960 magnesium ion homeostasis; GO:0010961 cellular magnesium ion homeostasis; GO:0015693 magnes…	GO:0005886 plasma membrane; GO:0016020 membrane; GO:0016323 basolateral plasma membrane; GO:0032991 protein-containing complex; GO:0071944 cell periphery; GO:0098590 plasma membrane region;	GO:0005215 transporter activity; GO:0008324 cation transmembrane transporter activity; GO:0015075 ion transmembrane transporter activity; GO:0015081 sodium ion transmembrane transporter activity; GO:0015095 magnesium ion transmembrane transporter activity; GO:0015291 secondary active transmembrane transporter activity; GO:0015297 antiporter activity; GO:0015298 solute:cation antiporter activity; …			P	KOG3788	Predicted divalent cation transporter
A0A3Q1MB37	propionate--CoA ligase OS=Bos taurus OX=9913 GN=ACSS2 PE=1 SV=1	ACSS2	1.66068	Up	80.2589	28994.2	48150	0.751688	1.24831	cytoplasm	K01895	ACSS1_2, acs; acetyl-CoA synthetase [EC:6.2.1.1]	map00010 Glycolysis / Gluconeogenesis; map00620 Pyruvate metabolism; map00630 Glyoxylate and dicarboxylate metabolism; map00640 Propanoate metabolism; map01100 Metabolic pathways; map01200 Carbon metabolism	GO:0006066 alcohol metabolic process; GO:0006067 ethanol metabolic process; GO:0006069 ethanol oxidation; GO:0006082 organic acid metabolic process; GO:0006083 acetate metabolic process; GO:0006084 acetyl-CoA metabolic process; GO:0006085 acetyl-CoA biosynthetic process; GO:0006091 generation of precursor metabolites and energy; GO:0006139 nucleobase-containing compound metabolic process; GO:0006…	GO:0005622 intracellular anatomical structure; GO:0005634 nucleus; GO:0005654 nucleoplasm; GO:0005737 cytoplasm; GO:0005739 mitochondrion; GO:0005759 mitochondrial matrix; GO:0005829 cytosol; GO:0031974 membrane-enclosed lumen; GO:0031981 nuclear lumen; GO:0043226 organelle; GO:0043227 membrane-bounded organelle; GO:0043229 intracellular organelle; GO:0043231 intracellular membrane-bounded organe…	GO:0000166 nucleotide binding; GO:0003824 catalytic activity; GO:0003987 acetate-CoA ligase activity; GO:0005488 binding; GO:0015645 fatty acid ligase activity; GO:0016208 AMP binding; GO:0016405 CoA-ligase activity; GO:0016874 ligase activity; GO:0016877 ligase activity, forming carbon-sulfur bonds; GO:0016878 acid-thiol ligase activity; GO:0017076 purine nucleotide binding; GO:0030554 adenyl nu…	PF13193	PF13193 AMP-binding enzyme C-terminal domain	I	KOG1175	Acyl-CoA synthetase
A0A3Q1MDS9	Activating transcription factor 6 OS=Bos taurus OX=9913 GN=ATF6 PE=4 SV=1	ATF6	0.506565	Down	66.3194	32980.8	16706.9	1.32752	0.672477	nucleus	K09054	ATF6A; cyclic AMP-dependent transcription factor ATF-6 alpha	map04141 Protein processing in endoplasmic reticulum	GO:0001654 eye development; GO:0003008 system process; GO:0006139 nucleobase-containing compound metabolic process; GO:0006351 transcription, DNA-templated; GO:0006355 regulation of transcription, DNA-templated; GO:0006357 regulation of transcription by RNA polymerase II; GO:0006366 transcription by RNA polymerase II; GO:0006457 protein folding; GO:0006725 cellular aromatic compound metabolic pro…	GO:0000139 Golgi membrane; GO:0005622 intracellular anatomical structure; GO:0005634 nucleus; GO:0005635 nuclear envelope; GO:0005654 nucleoplasm; GO:0005737 cytoplasm; GO:0005783 endoplasmic reticulum; GO:0005789 endoplasmic reticulum membrane; GO:0005794 Golgi apparatus; GO:0005829 cytosol; GO:0012505 endomembrane system; GO:0016020 membrane; GO:0016021 integral component of membrane; GO:003017…	GO:0000976 transcription cis-regulatory region binding; GO:0000977 RNA polymerase II transcription regulatory region sequence-specific DNA binding; GO:0000978 RNA polymerase II cis-regulatory region sequence-specific DNA binding; GO:0000981 DNA-binding transcription factor activity, RNA polymerase II-specific; GO:0000987 cis-regulatory region sequence-specific DNA binding; GO:0001067 transcriptio…			K	KOG4343	bZIP transcription factor ATF6
A0A3Q1MF38	Fatty acid desaturase 1 OS=Bos taurus OX=9913 GN=FADS1 PE=3 SV=1	FADS1	1.58475	Up	54.9742	5737.53	9092.52	0.773771	1.22623	plasma membrane	K10224	FADS1; acyl-CoA (8-3)-desaturase (Delta-5 desaturase) [EC:1.14.19.44]	map01040 Biosynthesis of unsaturated fatty acids; map01100 Metabolic pathways; map01212 Fatty acid metabolism	GO:0001676 long-chain fatty acid metabolic process; GO:0001889 liver development; GO:0006082 organic acid metabolic process; GO:0006355 regulation of transcription, DNA-templated; GO:0006629 lipid metabolic process; GO:0006631 fatty acid metabolic process; GO:0006633 fatty acid biosynthetic process; GO:0006636 unsaturated fatty acid biosynthetic process; GO:0006644 phospholipid metabolic process;…	GO:0005622 intracellular anatomical structure; GO:0005634 nucleus; GO:0005737 cytoplasm; GO:0005783 endoplasmic reticulum; GO:0005789 endoplasmic reticulum membrane; GO:0012505 endomembrane system; GO:0016020 membrane; GO:0016021 integral component of membrane; GO:0031224 intrinsic component of membrane; GO:0031984 organelle subcompartment; GO:0042175 nuclear outer membrane-endoplasmic reticulum …	GO:0000248 C-5 sterol desaturase activity; GO:0003824 catalytic activity; GO:0016213 linoleoyl-CoA desaturase activity; GO:0016215 acyl-CoA desaturase activity; GO:0016491 oxidoreductase activity; GO:0016705 oxidoreductase activity, acting on paired donors, with incorporation or reduction of molecular oxygen; GO:0016717 oxidoreductase activity, acting on paired donors, with oxidation of a pair of…	PF00487	PF00487 Fatty acid desaturase	I	KOG4232	Delta 6-fatty acid desaturase/delta-8 sphingolipid desaturase
A0A3Q1MFV3	ATP synthase lipid-binding protein OS=Bos taurus OX=9913 PE=3 SV=1	--	0.61534	Down	15.0105	196025	120622	1.23813	0.76187	mitochondria	K02128	ATPeF0C, ATP5G, ATP9; F-type H+-transporting ATPase subunit c	map00190 Oxidative phosphorylation; map01100 Metabolic pathways; map04714 Thermogenesis	GO:0006139 nucleobase-containing compound metabolic process; GO:0006163 purine nucleotide metabolic process; GO:0006164 purine nucleotide biosynthetic process; GO:0006725 cellular aromatic compound metabolic process; GO:0006753 nucleoside phosphate metabolic process; GO:0006754 ATP biosynthetic process; GO:0006793 phosphorus metabolic process; GO:0006796 phosphate-containing compound metabolic pr…	GO:0000276 mitochondrial proton-transporting ATP synthase complex, coupling factor F(o); GO:0005622 intracellular anatomical structure; GO:0005737 cytoplasm; GO:0005739 mitochondrion; GO:0005740 mitochondrial envelope; GO:0005743 mitochondrial inner membrane; GO:0005753 mitochondrial proton-transporting ATP synthase complex; GO:0016020 membrane; GO:0016469 proton-transporting two-sector ATPase co…	GO:0003824 catalytic activity; GO:0005215 transporter activity; GO:0008324 cation transmembrane transporter activity; GO:0015075 ion transmembrane transporter activity; GO:0015078 proton transmembrane transporter activity; GO:0015318 inorganic molecular entity transmembrane transporter activity; GO:0015399 primary active transmembrane transporter activity; GO:0016462 pyrophosphatase activity; GO:…			C	KOG3025	Mitochondrial F1F0-ATP synthase, subunit c/ATP9/proteolipid
A0A3Q1MG42	Myosin heavy chain 11 OS=Bos taurus OX=9913 GN=MYH11 PE=1 SV=1	MYH11	0.65878	Down	223.919	39558.9	26060.7	1.20571	0.794295	nucleus	K10352	MYH9s; myosin heavy chain 9/10/11/14	map04270 Vascular smooth muscle contraction; map04530 Tight junction; map04810 Regulation of actin cytoskeleton	GO:0000003 reproduction; GO:0000278 mitotic cell cycle; GO:0000281 mitotic cytokinesis; GO:0000910 cytokinesis; GO:0001654 eye development; GO:0001655 urogenital system development; GO:0001667 ameboidal-type cell migration; GO:0001700 embryonic development via the syncytial blastoderm; GO:0001736 establishment of planar polarity; GO:0001738 morphogenesis of a polarized epithelium; GO:0001745 comp…	GO:0001725 stress fiber; GO:0005622 intracellular anatomical structure; GO:0005737 cytoplasm; GO:0005826 actomyosin contractile ring; GO:0005829 cytosol; GO:0005856 cytoskeleton; GO:0005859 muscle myosin complex; GO:0005886 plasma membrane; GO:0005903 brush border; GO:0005911 cell-cell junction; GO:0005938 cell cortex; GO:0015629 actin cytoskeleton; GO:0016020 membrane; GO:0016459 myosin complex;…	GO:0000146 microfilament motor activity; GO:0000166 nucleotide binding; GO:0000287 magnesium ion binding; GO:0003774 cytoskeletal motor activity; GO:0003779 actin binding; GO:0003824 catalytic activity; GO:0005198 structural molecule activity; GO:0005488 binding; GO:0005515 protein binding; GO:0005524 ATP binding; GO:0008092 cytoskeletal protein binding; GO:0008307 structural constituent of muscl…	PF02736; PF00063	PF02736 Myosin N-terminal SH3-like domain; PF00063 Myosin head (motor domain)	Z	KOG0161	Myosin class II heavy chain
A0A3Q1MGH4	Membrane cofactor protein OS=Bos taurus OX=9913 GN=CD46 PE=4 SV=1	CD46	0.631912	Down	41.4753	91770.8	57991.1	1.22556	0.774444	plasma membrane	K04007	CD46, MCP; membrane cofactor protein	map04610 Complement and coagulation cascades				PF00084	PF00084 Sushi repeat (SCR repeat)
A0A3Q1MIB2	Store-operated calcium entry-associated regulatory factor OS=Bos taurus OX=9913 GN=SARAF PE=3 SV=1	SARAF	0.624058	Down	36.749	31908.8	19913	1.23148	0.768517	extracellular				GO:0010959 regulation of metal ion transport; GO:0032879 regulation of localization; GO:0043269 regulation of ion transport; GO:0050789 regulation of biological process; GO:0051049 regulation of transport; GO:0051924 regulation of calcium ion transport; GO:0065007 biological regulation; GO:2001256 regulation of store-operated calcium entry;	GO:0005622 intracellular anatomical structure; GO:0005737 cytoplasm; GO:0005783 endoplasmic reticulum; GO:0005789 endoplasmic reticulum membrane; GO:0012505 endomembrane system; GO:0016020 membrane; GO:0016021 integral component of membrane; GO:0030176 integral component of endoplasmic reticulum membrane; GO:0031224 intrinsic component of membrane; GO:0031227 intrinsic component of endoplasmic re…
A0A3Q1MLV0	Tropomyosin 4 OS=Bos taurus OX=9913 GN=TPM4 PE=1 SV=1	TPM4	0.555608	Down	32.8217	62968.5	34985.8	1.28567	0.714329	cytoplasm	K10375	TPM4; tropomyosin 4	map04260 Cardiac muscle contraction; map04261 Adrenergic signaling in cardiomyocytes	GO:0003008 system process; GO:0003012 muscle system process; GO:0006928 movement of cell or subcellular component; GO:0006936 muscle contraction; GO:0006996 organelle organization; GO:0007010 cytoskeleton organization; GO:0007015 actin filament organization; GO:0009987 cellular process; GO:0016043 cellular component organization; GO:0030029 actin filament-based process; GO:0030036 actin cytoskele…	GO:0001725 stress fiber; GO:0005622 intracellular anatomical structure; GO:0005737 cytoplasm; GO:0005829 cytosol; GO:0005856 cytoskeleton; GO:0005862 muscle thin filament tropomyosin; GO:0005865 striated muscle thin filament; GO:0005884 actin filament; GO:0015629 actin cytoskeleton; GO:0030016 myofibril; GO:0030017 sarcomere; GO:0032432 actin filament bundle; GO:0036379 myofilament; GO:0042641 ac…	GO:0003779 actin binding; GO:0005198 structural molecule activity; GO:0005488 binding; GO:0005509 calcium ion binding; GO:0005515 protein binding; GO:0008092 cytoskeletal protein binding; GO:0008307 structural constituent of muscle; GO:0042802 identical protein binding; GO:0042803 protein homodimerization activity; GO:0043167 ion binding; GO:0043169 cation binding; GO:0044877 protein-containing c…			Z	KOG1003	Actin filament-coating protein tropomyosin
A0A3Q1MQ56	receptor protein serine/threonine kinase OS=Bos taurus OX=9913 GN=TGFBR1 PE=3 SV=1	TGFBR1	0.652782	Down	54.8814	11644.4	7601.25	1.21008	0.789919	endoplasmic reticulum	K04674	TGFBR1, ALK5; TGF-beta receptor type-1 [EC:2.7.11.30]	map04010 MAPK signaling pathway; map04060 Cytokine-cytokine receptor interaction; map04068 FoxO signaling pathway; map04144 Endocytosis; map04218 Cellular senescence; map04350 TGF-beta signaling pathway; map04371 Apelin signaling pathway; map04380 Osteoclast differentiation; map04390 Hippo signaling pathway; map04520 Adherens junction; map04659 Th17 cell differentiation; map04926 Relaxin signalin…	GO:0000003 reproduction; GO:0000122 negative regulation of transcription by RNA polymerase II; GO:0000902 cell morphogenesis; GO:0000904 cell morphogenesis involved in differentiation; GO:0001101 response to acid chemical; GO:0001501 skeletal system development; GO:0001525 angiogenesis; GO:0001558 regulation of cell growth; GO:0001568 blood vessel development; GO:0001654 eye development; GO:00016…	GO:0005622 intracellular anatomical structure; GO:0005737 cytoplasm; GO:0005768 endosome; GO:0005886 plasma membrane; GO:0005887 integral component of plasma membrane; GO:0005901 caveola; GO:0005911 cell-cell junction; GO:0005923 bicellular tight junction; GO:0009986 cell surface; GO:0012505 endomembrane system; GO:0016020 membrane; GO:0016021 integral component of membrane; GO:0016323 basolatera…	GO:0000166 nucleotide binding; GO:0003824 catalytic activity; GO:0004672 protein kinase activity; GO:0004674 protein serine/threonine kinase activity; GO:0004675 transmembrane receptor protein serine/threonine kinase activity; GO:0004703 G protein-coupled receptor kinase activity; GO:0004888 transmembrane signaling receptor activity; GO:0005024 transforming growth factor beta-activated receptor a…	PF01064; PF00069	PF01064 Activin types I and II receptor domain; PF00069 Protein kinase domain	T	KOG2052	Activin A type IB receptor, serine/threonine protein kinase
A0A3Q1MU93	Beta-2-microglobulin OS=Bos taurus OX=9913 PE=3 SV=1	--	2.38928	Up	13.7849	71324.3	170414	0.590096	1.4099	extracellular	K08055	B2M; beta-2-microglobulin	map04612 Antigen processing and presentation	GO:0000041 transition metal ion transport; GO:0001775 cell activation; GO:0001817 regulation of cytokine production; GO:0001819 positive regulation of cytokine production; GO:0001910 regulation of leukocyte mediated cytotoxicity; GO:0001912 positive regulation of leukocyte mediated cytotoxicity; GO:0001914 regulation of T cell mediated cytotoxicity; GO:0001916 positive regulation of T cell mediat…	GO:0000139 Golgi membrane; GO:0005576 extracellular region; GO:0005615 extracellular space; GO:0005622 intracellular anatomical structure; GO:0005737 cytoplasm; GO:0005768 endosome; GO:0005769 early endosome; GO:0005783 endoplasmic reticulum; GO:0005788 endoplasmic reticulum lumen; GO:0005794 Golgi apparatus; GO:0005798 Golgi-associated vesicle; GO:0005829 cytosol; GO:0005886 plasma membrane; GO:…	GO:0005488 binding; GO:0005515 protein binding; GO:0042802 identical protein binding;	PF07654	PF07654 Immunoglobulin C1-set domain
A0A3Q1MUU4	Glycerol-3-phosphate dehydrogenase [NAD(+)] OS=Bos taurus OX=9913 PE=3 SV=1	--	0.620382	Down	38.2756	15927.5	9881.11	1.23428	0.765723	cytoplasm	K00006	GPD1; glycerol-3-phosphate dehydrogenase (NAD+) [EC:1.1.1.8]	map00564 Glycerophospholipid metabolism	GO:0001508 action potential; GO:0001932 regulation of protein phosphorylation; GO:0001933 negative regulation of protein phosphorylation; GO:0002027 regulation of heart rate; GO:0002028 regulation of sodium ion transport; GO:0003008 system process; GO:0003012 muscle system process; GO:0003013 circulatory system process; GO:0003015 heart process; GO:0003254 regulation of membrane depolarization; G…	GO:0005622 intracellular anatomical structure; GO:0005737 cytoplasm; GO:0005829 cytosol; GO:0005886 plasma membrane; GO:0016020 membrane; GO:0030016 myofibril; GO:0030017 sarcomere; GO:0030018 Z disc; GO:0031430 M band; GO:0031672 A band; GO:0031674 I band; GO:0043226 organelle; GO:0043228 non-membrane-bounded organelle; GO:0043229 intracellular organelle; GO:0043232 intracellular non-membrane-bo…	GO:0003824 catalytic activity; GO:0004367 glycerol-3-phosphate dehydrogenase [NAD+] activity; GO:0004368 glycerol-3-phosphate dehydrogenase (quinone) activity; GO:0005488 binding; GO:0005515 protein binding; GO:0016247 channel regulator activity; GO:0016491 oxidoreductase activity; GO:0016614 oxidoreductase activity, acting on CH-OH group of donors; GO:0016616 oxidoreductase activity, acting on t…	PF07479	PF07479 NAD-dependent glycerol-3-phosphate dehydrogenase C-terminus	C	KOG2711	Glycerol-3-phosphate dehydrogenase/dihydroxyacetone 3-phosphate reductase
A0A3Q1MYB1	Non-SMC condensin I complex subunit G OS=Bos taurus OX=9913 GN=NCAPG PE=3 SV=1	NCAPG	1.64166	Up	108.456	9957.06	16346.2	0.757098	1.2429	cytoplasm	K06678	YCG1, CAPG; condensin complex subunit 3		GO:0000070 mitotic sister chromatid segregation; GO:0000278 mitotic cell cycle; GO:0000280 nuclear division; GO:0000281 mitotic cytokinesis; GO:0000819 sister chromatid segregation; GO:0000910 cytokinesis; GO:0006323 DNA packaging; GO:0006996 organelle organization; GO:0007049 cell cycle; GO:0007059 chromosome segregation; GO:0007076 mitotic chromosome condensation; GO:0009987 cellular process; G…	GO:0000785 chromatin; GO:0000793 condensed chromosome; GO:0000796 condensin complex; GO:0005622 intracellular anatomical structure; GO:0005634 nucleus; GO:0005694 chromosome; GO:0005737 cytoplasm; GO:0005829 cytosol; GO:0032991 protein-containing complex; GO:0043226 organelle; GO:0043227 membrane-bounded organelle; GO:0043228 non-membrane-bounded organelle; GO:0043229 intracellular organelle; GO:…				BD	KOG2025	Chromosome condensation complex Condensin, subunit G
A0A3Q1N0Y8	Calsyntenin 1 OS=Bos taurus OX=9913 GN=CLSTN1 PE=4 SV=1	CLSTN1	1.51683	Up	107.486	5107.2	7746.76	0.79465	1.20535	plasma membrane	K22659	CLSTN1; calsyntenin 1		GO:0001558 regulation of cell growth; GO:0003008 system process; GO:0006873 cellular ion homeostasis; GO:0006874 cellular calcium ion homeostasis; GO:0006875 cellular metal ion homeostasis; GO:0007154 cell communication; GO:0007155 cell adhesion; GO:0007267 cell-cell signaling; GO:0007268 chemical synaptic transmission; GO:0007610 behavior; GO:0007611 learning or memory; GO:0007612 learning; GO:0…	GO:0005576 extracellular region; GO:0005615 extracellular space; GO:0005622 intracellular anatomical structure; GO:0005737 cytoplasm; GO:0005794 Golgi apparatus; GO:0005886 plasma membrane; GO:0005887 integral component of plasma membrane; GO:0009986 cell surface; GO:0012505 endomembrane system; GO:0014069 postsynaptic density; GO:0016020 membrane; GO:0016021 integral component of membrane; GO:00…	GO:0001540 amyloid-beta binding; GO:0005102 signaling receptor binding; GO:0005158 insulin receptor binding; GO:0005488 binding; GO:0005509 calcium ion binding; GO:0005515 protein binding; GO:0008092 cytoskeletal protein binding; GO:0019894 kinesin binding; GO:0033218 amide binding; GO:0042277 peptide binding; GO:0042988 X11-like protein binding; GO:0043167 ion binding; GO:0043169 cation binding;…	PF00028; PF13385	PF00028 Cadherin domain; PF13385 Concanavalin A-like lectin/glucanases superfamily	W	KOG1834	Calsyntenin
A0A3Q1N6U5	Kinesin-like protein OS=Bos taurus OX=9913 GN=KIFC3 PE=3 SV=1	KIFC3	0.487268	Down	104.209	33717.5	16429.5	1.34475	0.655252	nucleus	K10406	KIFC2_3; kinesin family member C2/C3		GO:0003008 system process; GO:0006928 movement of cell or subcellular component; GO:0006996 organelle organization; GO:0007017 microtubule-based process; GO:0007018 microtubule-based movement; GO:0007030 Golgi organization; GO:0007155 cell adhesion; GO:0007600 sensory perception; GO:0007601 visual perception; GO:0009987 cellular process; GO:0010256 endomembrane system organization; GO:0016043 cel…	GO:0005622 intracellular anatomical structure; GO:0005737 cytoplasm; GO:0005794 Golgi apparatus; GO:0005813 centrosome; GO:0005815 microtubule organizing center; GO:0005856 cytoskeleton; GO:0005871 kinesin complex; GO:0005875 microtubule associated complex; GO:0005911 cell-cell junction; GO:0005912 adherens junction; GO:0005915 zonula adherens; GO:0012505 endomembrane system; GO:0015630 microtubu…	GO:0003774 cytoskeletal motor activity; GO:0003777 microtubule motor activity; GO:0003824 catalytic activity; GO:0005488 binding; GO:0005515 protein binding; GO:0008569 minus-end-directed microtubule motor activity; GO:0016462 pyrophosphatase activity; GO:0016787 hydrolase activity; GO:0016817 hydrolase activity, acting on acid anhydrides; GO:0016818 hydrolase activity, acting on acid anhydrides,…	PF00225	PF00225 Kinesin motor domain	Z	KOG0239	Kinesin (KAR3 subfamily)
A0A3Q1NCM6	Probable RNA-binding protein EIF1AD OS=Bos taurus OX=9913 GN=EIF1AD PE=3 SV=1	EIF1AD	0.639583	Down	19.2672	17936.7	11472	1.21982	0.780178	nucleus	K15025	EIF1AD; probable RNA-binding protein EIF1AD			GO:0005622 intracellular anatomical structure; GO:0005634 nucleus; GO:0043226 organelle; GO:0043227 membrane-bounded organelle; GO:0043229 intracellular organelle; GO:0043231 intracellular membrane-bounded organelle;		PF01176	PF01176 Translation initiation factor 1A / IF-1	J	KOG2925	Predicted translation initiation factor related to eIF-1A
A0A3Q1NGX1	RNA binding motif protein 19 OS=Bos taurus OX=9913 GN=RBM19 PE=4 SV=1	RBM19	0.646992	Down	105.898	27503.3	17794.4	1.21433	0.785665	nucleus	K14787	MRD1, RBM19; multiple RNA-binding domain-containing protein 1		GO:0000003 reproduction; GO:0000469 cleavage involved in rRNA processing; GO:0000478 endonucleolytic cleavage involved in rRNA processing; GO:0002119 nematode larval development; GO:0002164 larval development; GO:0003006 developmental process involved in reproduction; GO:0006139 nucleobase-containing compound metabolic process; GO:0006364 rRNA processing; GO:0006396 RNA processing; GO:0006725 cel…	GO:0005622 intracellular anatomical structure; GO:0005634 nucleus; GO:0005654 nucleoplasm; GO:0005694 chromosome; GO:0005730 nucleolus; GO:0005737 cytoplasm; GO:0031974 membrane-enclosed lumen; GO:0031981 nuclear lumen; GO:0043226 organelle; GO:0043227 membrane-bounded organelle; GO:0043228 non-membrane-bounded organelle; GO:0043229 intracellular organelle; GO:0043231 intracellular membrane-bound…	GO:0003676 nucleic acid binding; GO:0003723 RNA binding; GO:0003729 mRNA binding; GO:0003824 catalytic activity; GO:0004386 helicase activity; GO:0005488 binding; GO:0016462 pyrophosphatase activity; GO:0016787 hydrolase activity; GO:0016817 hydrolase activity, acting on acid anhydrides; GO:0016818 hydrolase activity, acting on acid anhydrides, in phosphorus-containing anhydrides; GO:0017111 nucl…	PF00076	PF00076 RNA recognition motif. (a.k.a. RRM, RBD, or RNP domain)	R	KOG0110	RNA-binding protein (RRM superfamily)
A0A3Q1NKC2	calcium/calmodulin-dependent protein kinase OS=Bos taurus OX=9913 GN=CAMK2G PE=3 SV=1	CAMK2G	1.56503	Up	64.0326	5522.3	8642.59	0.779717	1.22028	cytoplasm	K04515	CAMK2; calcium/calmodulin-dependent protein kinase (CaM kinase) II [EC:2.7.11.17]	map04012 ErbB signaling pathway; map04020 Calcium signaling pathway; map04024 cAMP signaling pathway; map04066 HIF-1 signaling pathway; map04114 Oocyte meiosis; map04217 Necroptosis; map04261 Adrenergic signaling in cardiomyocytes; map04310 Wnt signaling pathway; map04360 Axon guidance; map04713 Circadian entrainment; map04720 Long-term potentiation; map04722 Neurotrophin signaling pathway; map04…	GO:0000003 reproduction; GO:0000082 G1/S transition of mitotic cell cycle; GO:0000165 MAPK cascade; GO:0000278 mitotic cell cycle; GO:0001666 response to hypoxia; GO:0002376 immune system process; GO:0002790 peptide secretion; GO:0003008 system process; GO:0006464 cellular protein modification process; GO:0006468 protein phosphorylation; GO:0006470 protein dephosphorylation; GO:0006793 phosphorus…	GO:0005622 intracellular anatomical structure; GO:0005634 nucleus; GO:0005654 nucleoplasm; GO:0005737 cytoplasm; GO:0005829 cytosol; GO:0005886 plasma membrane; GO:0005954 calcium- and calmodulin-dependent protein kinase complex; GO:0012506 vesicle membrane; GO:0014069 postsynaptic density; GO:0016020 membrane; GO:0030139 endocytic vesicle; GO:0030424 axon; GO:0030425 dendrite; GO:0030659 cytopla…	GO:0003824 catalytic activity; GO:0004672 protein kinase activity; GO:0004674 protein serine/threonine kinase activity; GO:0004683 calmodulin-dependent protein kinase activity; GO:0004721 phosphoprotein phosphatase activity; GO:0004722 protein serine/threonine phosphatase activity; GO:0004723 calcium-dependent protein serine/threonine phosphatase activity; GO:0005085 guanyl-nucleotide exchange fa…	PF00069; PF08332	PF00069 Protein kinase domain; PF08332 Calcium/calmodulin dependent protein kinase II association domain	T	KOG0033	Ca2+/calmodulin-dependent protein kinase, EF-Hand protein superfamily
A0A3S5ZPV5	Histone-lysine N-trimethyltransferase SMYD5 OS=Bos taurus OX=9913 GN=SMYD5 PE=4 SV=1	SMYD5	1.81382	Up	47.1673	5143.62	9329.59	0.710778	1.28922	extracellular	K24635	SMYD5, ZMYND23; SET and MYND domain-containing protein 5 [EC:2.1.1.-]		GO:0006325 chromatin organization; GO:0006464 cellular protein modification process; GO:0006479 protein methylation; GO:0006807 nitrogen compound metabolic process; GO:0006996 organelle organization; GO:0008152 metabolic process; GO:0008213 protein alkylation; GO:0009987 cellular process; GO:0016043 cellular component organization; GO:0016570 histone modification; GO:0016571 histone methylation; …	GO:0000228 nuclear chromosome; GO:0000785 chromatin; GO:0005622 intracellular anatomical structure; GO:0005634 nucleus; GO:0005694 chromosome; GO:0031974 membrane-enclosed lumen; GO:0031981 nuclear lumen; GO:0043226 organelle; GO:0043227 membrane-bounded organelle; GO:0043228 non-membrane-bounded organelle; GO:0043229 intracellular organelle; GO:0043231 intracellular membrane-bounded organelle; G…	GO:0003824 catalytic activity; GO:0008168 methyltransferase activity; GO:0008757 S-adenosylmethionine-dependent methyltransferase activity; GO:0016740 transferase activity; GO:0016741 transferase activity, transferring one-carbon groups;			B	KOG2084	Predicted histone tail methylase containing SET domain
A0A452DHY9	PHD finger protein 10 OS=Bos taurus OX=9913 GN=PHF10 PE=3 SV=1	PHF10	0.516471	Down	51.0656	17624	9102.28	1.31885	0.681148	cytoplasm	K22197	BAF45A, PHF10; BRG1-associated factor 45A		GO:0002009 morphogenesis of an epithelium; GO:0002165 instar larval or pupal development; GO:0006139 nucleobase-containing compound metabolic process; GO:0006351 transcription, DNA-templated; GO:0006355 regulation of transcription, DNA-templated; GO:0006725 cellular aromatic compound metabolic process; GO:0006807 nitrogen compound metabolic process; GO:0007275 multicellular organism development; …	GO:0000228 nuclear chromosome; GO:0000785 chromatin; GO:0000791 euchromatin; GO:0000792 heterochromatin; GO:0005622 intracellular anatomical structure; GO:0005634 nucleus; GO:0005694 chromosome; GO:0005700 polytene chromosome; GO:0005701 polytene chromosome chromocenter; GO:0010369 chromocenter; GO:0016586 RSC-type complex; GO:0031974 membrane-enclosed lumen; GO:0031981 nuclear lumen; GO:0032991 …	GO:0003682 chromatin binding; GO:0005488 binding;	PF00628	PF00628 PHD-finger	R	KOG1512	PHD Zn-finger protein
A0A452DI93	Serine protease HTRA1 OS=Bos taurus OX=9913 GN=HTRA1 PE=3 SV=1	HTRA1	1.84195	Up	55.9704	35214.9	64864	0.703743	1.29626	mitochondria	K08784	HTRA1, PRSS11; HtrA serine peptidase 1 [EC:3.4.21.-]		GO:0000003 reproduction; GO:0001890 placenta development; GO:0002682 regulation of immune system process; GO:0002683 negative regulation of immune system process; GO:0002697 regulation of immune effector process; GO:0002698 negative regulation of immune effector process; GO:0002831 regulation of response to biotic stimulus; GO:0002832 negative regulation of response to biotic stimulus; GO:0003006…	GO:0005576 extracellular region; GO:0005615 extracellular space; GO:0005622 intracellular anatomical structure; GO:0005737 cytoplasm; GO:0005739 mitochondrion; GO:0005740 mitochondrial envelope; GO:0005758 mitochondrial intermembrane space; GO:0005829 cytosol; GO:0005886 plasma membrane; GO:0016006 Nebenkern; GO:0016020 membrane; GO:0031012 extracellular matrix; GO:0031967 organelle envelope; GO:…	GO:0003824 catalytic activity; GO:0004175 endopeptidase activity; GO:0004252 serine-type endopeptidase activity; GO:0005488 binding; GO:0005515 protein binding; GO:0008233 peptidase activity; GO:0008236 serine-type peptidase activity; GO:0016787 hydrolase activity; GO:0017171 serine hydrolase activity; GO:0042802 identical protein binding; GO:0140096 catalytic activity, acting on a protein;	PF00219; PF07648; PF13365; PF17820	PF00219 Insulin-like growth factor binding protein; PF07648 Kazal-type serine protease inhibitor domain; PF13365 Trypsin-like peptidase domain; PF17820 PDZ domain	O	KOG1320	Serine protease
A0A452DID3	Phosphoinositide-3-kinase-interacting protein 1 OS=Bos taurus OX=9913 GN=PIK3IP1 PE=4 SV=1	PIK3IP1	1.54431	Up	27.7985	8910.27	13760.2	0.786067	1.21393	extracellular				GO:0009892 negative regulation of metabolic process; GO:0009966 regulation of signal transduction; GO:0009968 negative regulation of signal transduction; GO:0010563 negative regulation of phosphorus metabolic process; GO:0010646 regulation of cell communication; GO:0010648 negative regulation of cell communication; GO:0014066 regulation of phosphatidylinositol 3-kinase signaling; GO:0014067 negat…		GO:0005488 binding; GO:0005515 protein binding; GO:0019899 enzyme binding; GO:0019900 kinase binding; GO:0036313 phosphatidylinositol 3-kinase catalytic subunit binding; GO:0043548 phosphatidylinositol 3-kinase binding;	PF00051	PF00051 Kringle domain
A0A452DII2	CYFIP-related Rac1 interactor A OS=Bos taurus OX=9913 GN=CYRIA PE=3 SV=1	CYRIA	1.53643	Up	40.9728	11784.7	18106.3	0.788509	1.21149	cytoplasm					GO:0005622 intracellular anatomical structure;	GO:0005488 binding; GO:0005515 protein binding;	PF07159	PF07159 CYRIA/CYRIB Rac1 binding domain	S	KOG3951	Uncharacterized conserved protein
A0A452DIQ8	Polynucleotide 5'-hydroxyl-kinase NOL9 OS=Bos taurus OX=9913 GN=NOL9 PE=4 SV=1	NOL9	0.538479	Down	78.1146	15546.6	8371.5	1.29999	0.700015	mitochondria	K06947	GRC3, NOL9; polynucleotide 5'-hydroxyl-kinase GRC3/NOL9 [EC:2.7.1.-]		GO:0000448 cleavage in ITS2 between 5.8S rRNA and LSU-rRNA of tricistronic rRNA transcript (SSU-rRNA, 5.8S rRNA, LSU-rRNA); GO:0000460 maturation of 5.8S rRNA; GO:0000463 maturation of LSU-rRNA from tricistronic rRNA transcript (SSU-rRNA, 5.8S rRNA, LSU-rRNA); GO:0000466 maturation of 5.8S rRNA from tricistronic rRNA transcript (SSU-rRNA, 5.8S rRNA, LSU-rRNA); GO:0000469 cleavage involved in rRNA…	GO:0005622 intracellular anatomical structure; GO:0005634 nucleus; GO:0005654 nucleoplasm; GO:0005730 nucleolus; GO:0005856 cytoskeleton; GO:0031974 membrane-enclosed lumen; GO:0031981 nuclear lumen; GO:0043226 organelle; GO:0043227 membrane-bounded organelle; GO:0043228 non-membrane-bounded organelle; GO:0043229 intracellular organelle; GO:0043231 intracellular membrane-bounded organelle; GO:004…	GO:0000166 nucleotide binding; GO:0003824 catalytic activity; GO:0005488 binding; GO:0005524 ATP binding; GO:0016301 kinase activity; GO:0016740 transferase activity; GO:0016772 transferase activity, transferring phosphorus-containing groups; GO:0016773 phosphotransferase activity, alcohol group as acceptor; GO:0017076 purine nucleotide binding; GO:0019205 nucleobase-containing compound kinase ac…	PF16575	PF16575 mRNA cleavage and polyadenylation factor CLP1 P-loop	R	KOG2750	Uncharacterized conserved protein similar to ATP/GTP-binding protein
A0A452DJ42	ATP synthase-coupling factor 6, mitochondrial OS=Bos taurus OX=9913 GN=ATP5PF PE=1 SV=1	ATP5PF	1.78733	Up	30.26	39121.8	69923.7	0.717531	1.28247	nucleus	K02131	ATPeF0F6, ATP5J; F-type H+-transporting ATPase subunit 6	map00190 Oxidative phosphorylation; map01100 Metabolic pathways; map04714 Thermogenesis	GO:0006091 generation of precursor metabolites and energy; GO:0006119 oxidative phosphorylation; GO:0006139 nucleobase-containing compound metabolic process; GO:0006163 purine nucleotide metabolic process; GO:0006164 purine nucleotide biosynthetic process; GO:0006725 cellular aromatic compound metabolic process; GO:0006753 nucleoside phosphate metabolic process; GO:0006754 ATP biosynthetic proces…	GO:0000275 mitochondrial proton-transporting ATP synthase complex, catalytic sector F(1); GO:0000276 mitochondrial proton-transporting ATP synthase complex, coupling factor F(o); GO:0005622 intracellular anatomical structure; GO:0005737 cytoplasm; GO:0005739 mitochondrion; GO:0005740 mitochondrial envelope; GO:0005743 mitochondrial inner membrane; GO:0005753 mitochondrial proton-transporting ATP …	GO:0005215 transporter activity; GO:0022857 transmembrane transporter activity;			C	KOG4634	Mitochondrial F1F0-ATP synthase, subunit Cf6 (coupling factor 6)
A1A4M4	Putative deoxyribonuclease TATDN3 OS=Bos taurus OX=9913 GN=TATDN3 PE=2 SV=1	TATDN3	0.310875	Down	30.0126	23523.5	7312.87	1.5257	0.474302	cytoplasm	K03424	tatD; TatD DNase family protein [EC:3.1.21.-]					PF01026	PF01026 TatD related DNase	L	KOG3020	TatD-related DNase
A1L506	Ubiquitin carboxyl-terminal hydrolase OS=Bos taurus OX=9913 GN=USP11 PE=2 SV=1	USP11	1.56554	Up	86.4273	21655.6	33902.8	0.779562	1.22044	nucleus	K11835	USP4_11, UBP12; ubiquitin carboxyl-terminal hydrolase 4/11 [EC:3.4.19.12]		GO:0006464 cellular protein modification process; GO:0006508 proteolysis; GO:0006511 ubiquitin-dependent protein catabolic process; GO:0006807 nitrogen compound metabolic process; GO:0008152 metabolic process; GO:0009056 catabolic process; GO:0009057 macromolecule catabolic process; GO:0009987 cellular process; GO:0016579 protein deubiquitination; GO:0019538 protein metabolic process; GO:0019941 …	GO:0005622 intracellular anatomical structure; GO:0005634 nucleus; GO:0005654 nucleoplasm; GO:0005737 cytoplasm; GO:0005829 cytosol; GO:0031974 membrane-enclosed lumen; GO:0031981 nuclear lumen; GO:0043226 organelle; GO:0043227 membrane-bounded organelle; GO:0043229 intracellular organelle; GO:0043231 intracellular membrane-bounded organelle; GO:0043233 organelle lumen; GO:0070013 intracellular o…	GO:0003824 catalytic activity; GO:0004175 endopeptidase activity; GO:0004197 cysteine-type endopeptidase activity; GO:0004843 thiol-dependent deubiquitinase; GO:0008233 peptidase activity; GO:0008234 cysteine-type peptidase activity; GO:0016787 hydrolase activity; GO:0019783 ubiquitin-like protein-specific protease activity; GO:0101005 deubiquitinase activity; GO:0140096 catalytic activity, actin…	PF14836	PF14836 Ubiquitin-like domain	O	KOG1870	Ubiquitin C-terminal hydrolase
A2VDV0	Nudix (Nucleoside diphosphate linked moiety X)-type motif 4 OS=Bos taurus OX=9913 GN=NUDT4 PE=2 SV=1	NUDT4	1.78168	Up	20.4992	9876.1	17596	0.71899	1.28101	nucleus	K07766	E3.6.1.52; diphosphoinositol-polyphosphate diphosphatase [EC:3.6.1.52]		GO:0006066 alcohol metabolic process; GO:0006139 nucleobase-containing compound metabolic process; GO:0006163 purine nucleotide metabolic process; GO:0006195 purine nucleotide catabolic process; GO:0006629 lipid metabolic process; GO:0006644 phospholipid metabolic process; GO:0006650 glycerophospholipid metabolic process; GO:0006725 cellular aromatic compound metabolic process; GO:0006753 nucleos…	GO:0005622 intracellular anatomical structure; GO:0005634 nucleus; GO:0005737 cytoplasm; GO:0005829 cytosol; GO:0043226 organelle; GO:0043227 membrane-bounded organelle; GO:0043229 intracellular organelle; GO:0043231 intracellular membrane-bounded organelle;	GO:0000298 endopolyphosphatase activity; GO:0003676 nucleic acid binding; GO:0003723 RNA binding; GO:0003824 catalytic activity; GO:0004551 nucleotide diphosphatase activity; GO:0005488 binding; GO:0008486 diphosphoinositol-polyphosphate diphosphatase activity; GO:0016462 pyrophosphatase activity; GO:0016787 hydrolase activity; GO:0016817 hydrolase activity, acting on acid anhydrides; GO:0016818 …	PF00293	PF00293 NUDIX domain	T	KOG2839	Diadenosine and diphosphoinositol polyphosphate phosphohydrolase
A2VE00	Coiled-coil domain-containing protein 126 OS=Bos taurus OX=9913 GN=CCDC126 PE=2 SV=1	CCDC126	0.551871	Down	15.5933	30430	16793.4	1.28877	0.711233	extracellular				GO:0006464 cellular protein modification process; GO:0006486 protein glycosylation; GO:0006487 protein N-linked glycosylation; GO:0006807 nitrogen compound metabolic process; GO:0008152 metabolic process; GO:0009058 biosynthetic process; GO:0009059 macromolecule biosynthetic process; GO:0009100 glycoprotein metabolic process; GO:0009101 glycoprotein biosynthetic process; GO:0009987 cellular proce…	GO:0005622 intracellular anatomical structure; GO:0005737 cytoplasm; GO:0005794 Golgi apparatus; GO:0012505 endomembrane system; GO:0043226 organelle; GO:0043227 membrane-bounded organelle; GO:0043229 intracellular organelle; GO:0043231 intracellular membrane-bounded organelle;	GO:0003824 catalytic activity; GO:0008194 UDP-glycosyltransferase activity; GO:0008375 acetylglucosaminyltransferase activity; GO:0016740 transferase activity; GO:0016757 glycosyltransferase activity; GO:0016758 hexosyltransferase activity; GO:0030144 alpha-1,6-mannosylglycoprotein 6-beta-N-acetylglucosaminyltransferase activity; GO:0140096 catalytic activity, acting on a protein; GO:0140103 cata…
A5D7H7	LOC528833 protein OS=Bos taurus OX=9913 GN=NOP9 PE=2 SV=1	NOP9	0.577852	Down	69.5437	49043.1	28339.6	1.26755	0.732454	nucleus	K14790	NOP9; nucleolar protein 9							J	KOG2188	Predicted RNA-binding protein, contains Pumilio domains
A5D7R9	NRAS protein OS=Bos taurus OX=9913 GN=NRAS PE=2 SV=1	NRAS	1.57618	Up	21.2292	25683.9	40482.4	0.776343	1.22366	cytoplasm	K07828	NRAS; GTPase NRas	map04010 MAPK signaling pathway; map04012 ErbB signaling pathway; map04014 Ras signaling pathway; map04015 Rap1 signaling pathway; map04062 Chemokine signaling pathway; map04068 FoxO signaling pathway; map04071 Sphingolipid signaling pathway; map04072 Phospholipase D signaling pathway; map04137 Mitophagy - animal; map04140 Autophagy - animal; map04150 mTOR signaling pathway; map04151 PI3K-Akt sig…	GO:0000003 reproduction; GO:0000165 MAPK cascade; GO:0001562 response to protozoan; GO:0001708 cell fate specification; GO:0001775 cell activation; GO:0001817 regulation of cytokine production; GO:0001819 positive regulation of cytokine production; GO:0001932 regulation of protein phosphorylation; GO:0001936 regulation of endothelial cell proliferation; GO:0001938 positive regulation of endotheli…	GO:0005622 intracellular anatomical structure; GO:0005737 cytoplasm; GO:0005794 Golgi apparatus; GO:0005886 plasma membrane; GO:0005938 cell cortex; GO:0012505 endomembrane system; GO:0012506 vesicle membrane; GO:0016020 membrane; GO:0030141 secretory granule; GO:0030659 cytoplasmic vesicle membrane; GO:0030667 secretory granule membrane; GO:0031090 organelle membrane; GO:0031410 cytoplasmic vesi…	GO:0000166 nucleotide binding; GO:0001882 nucleoside binding; GO:0001883 purine nucleoside binding; GO:0003824 catalytic activity; GO:0003924 GTPase activity; GO:0005085 guanyl-nucleotide exchange factor activity; GO:0005488 binding; GO:0005515 protein binding; GO:0005525 GTP binding; GO:0016462 pyrophosphatase activity; GO:0016787 hydrolase activity; GO:0016817 hydrolase activity, acting on acid…	PF00071	PF00071 Ras family	R	KOG0395	Ras-related GTPase
A5PJC5	MLYCD protein OS=Bos taurus OX=9913 GN=MLYCD PE=2 SV=1	MLYCD	0.631184	Down	55.416	42249	26666.9	1.2261	0.773897	mitochondria	K01578	MLYCD; malonyl-CoA decarboxylase [EC:4.1.1.9]	map00410 beta-Alanine metabolism; map00640 Propanoate metabolism; map01100 Metabolic pathways; map04146 Peroxisome; map04152 AMPK signaling pathway	GO:0002931 response to ischemia; GO:0006082 organic acid metabolic process; GO:0006084 acetyl-CoA metabolic process; GO:0006085 acetyl-CoA biosynthetic process; GO:0006109 regulation of carbohydrate metabolic process; GO:0006139 nucleobase-containing compound metabolic process; GO:0006163 purine nucleotide metabolic process; GO:0006164 purine nucleotide biosynthetic process; GO:0006195 purine nuc…	GO:0005622 intracellular anatomical structure; GO:0005737 cytoplasm; GO:0005739 mitochondrion; GO:0005759 mitochondrial matrix; GO:0005777 peroxisome; GO:0005782 peroxisomal matrix; GO:0005829 cytosol; GO:0031907 microbody lumen; GO:0031974 membrane-enclosed lumen; GO:0042579 microbody; GO:0043226 organelle; GO:0043227 membrane-bounded organelle; GO:0043229 intracellular organelle; GO:0043231 int…	GO:0003824 catalytic activity; GO:0005102 signaling receptor binding; GO:0005488 binding; GO:0005515 protein binding; GO:0016829 lyase activity; GO:0016830 carbon-carbon lyase activity; GO:0016831 carboxy-lyase activity; GO:0042802 identical protein binding; GO:0050080 malonyl-CoA decarboxylase activity;	PF17408; PF05292	PF17408 Malonyl-CoA decarboxylase N-terminal domain; PF05292 Malonyl-CoA decarboxylase C-terminal domain	G	KOG3018	Malonyl-CoA decarboxylase
A5PJQ7	PX domain containing serine/threonine kinase like OS=Bos taurus OX=9913 GN=PXK PE=2 SV=1	PXK	0.647777	Down	65.076	10409.9	6743.29	1.21376	0.786243	nucleus	K17543	PXK; PX domain-containing protein kinase-like protein		GO:0006950 response to stress; GO:0006952 defense response; GO:0006954 inflammatory response; GO:0010646 regulation of cell communication; GO:0023051 regulation of signaling; GO:0032780 negative regulation of ATP-dependent activity; GO:0032879 regulation of localization; GO:0043086 negative regulation of catalytic activity; GO:0043269 regulation of ion transport; GO:0043271 negative regulation of…	GO:0005622 intracellular anatomical structure; GO:0005634 nucleus; GO:0005737 cytoplasm; GO:0005815 microtubule organizing center; GO:0005829 cytosol; GO:0005856 cytoskeleton; GO:0005886 plasma membrane; GO:0015630 microtubule cytoskeleton; GO:0016020 membrane; GO:0032991 protein-containing complex; GO:0043226 organelle; GO:0043227 membrane-bounded organelle; GO:0043228 non-membrane-bounded organ…	GO:0005488 binding; GO:0005515 protein binding; GO:0005543 phospholipid binding; GO:0008022 protein C-terminus binding; GO:0008289 lipid binding; GO:0035091 phosphatidylinositol binding; GO:0043167 ion binding; GO:0043168 anion binding;	PF00787	PF00787 PX domain	ZUD	KOG2101	Intermediate filament-like protein, sorting nexins, and related proteins containing PX (PhoX) domain(s)
A6QLP3	E3 ubiquitin-protein ligase PPP1R11 OS=Bos taurus OX=9913 GN=PPP1R11 PE=2 SV=1	PPP1R11	1.55027	Up	13.8753	10279.7	15936.2	0.784232	1.21577	nucleus	K17553	PPP1R11; protein phosphatase 1 regulatory subunit 11		GO:0001817 regulation of cytokine production; GO:0001818 negative regulation of cytokine production; GO:0002791 regulation of peptide secretion; GO:0002792 negative regulation of peptide secretion; GO:0006464 cellular protein modification process; GO:0006508 proteolysis; GO:0006511 ubiquitin-dependent protein catabolic process; GO:0006807 nitrogen compound metabolic process; GO:0006950 response t…	GO:0000164 protein phosphatase type 1 complex; GO:0005622 intracellular anatomical structure; GO:0005634 nucleus; GO:0005737 cytoplasm; GO:0008287 protein serine/threonine phosphatase complex; GO:0032991 protein-containing complex; GO:0043226 organelle; GO:0043227 membrane-bounded organelle; GO:0043229 intracellular organelle; GO:0043231 intracellular membrane-bounded organelle; GO:1902494 cataly…	GO:0003824 catalytic activity; GO:0004842 ubiquitin-protein transferase activity; GO:0004857 enzyme inhibitor activity; GO:0004864 protein phosphatase inhibitor activity; GO:0004865 protein serine/threonine phosphatase inhibitor activity; GO:0005488 binding; GO:0005515 protein binding; GO:0008157 protein phosphatase 1 binding; GO:0016740 transferase activity; GO:0019208 phosphatase regulator acti…			S	KOG4102	Uncharacterized conserved protein
A6QNU9	PI-PLC X domain-containing protein 3 OS=Bos taurus OX=9913 GN=PLCXD3 PE=2 SV=1	PLCXD3	1.82503	Up	36.3567	12761.3	23289.8	0.707956	1.29204	cytoplasm									T	KOG4306	Glycosylphosphatidylinositol-specific phospholipase C
A6QNZ7	Keratin 10 (Epidermolytic hyperkeratosis; keratosis palmaris et plantaris) OS=Bos taurus OX=9913 GN=KRT10 PE=2 SV=1	KRT10	0.585142	Down	54.8492	47031.4	27520	1.26172	0.738283	nucleus	K07604	KRT1; type I keratin, acidic	map04915 Estrogen signaling pathway	GO:0001942 hair follicle development; GO:0002009 morphogenesis of an epithelium; GO:0002064 epithelial cell development; GO:0003334 keratinocyte development; GO:0006996 organelle organization; GO:0007010 cytoskeleton organization; GO:0007275 multicellular organism development; GO:0008544 epidermis development; GO:0009653 anatomical structure morphogenesis; GO:0009888 tissue development; GO:000991…	GO:0005622 intracellular anatomical structure; GO:0005856 cytoskeleton; GO:0005882 intermediate filament; GO:0043226 organelle; GO:0043228 non-membrane-bounded organelle; GO:0043229 intracellular organelle; GO:0043232 intracellular non-membrane-bounded organelle; GO:0045095 keratin filament; GO:0045111 intermediate filament cytoskeleton; GO:0099080 supramolecular complex; GO:0099081 supramolecula…	GO:0005488 binding; GO:0005515 protein binding; GO:0008092 cytoskeletal protein binding; GO:0046982 protein heterodimerization activity; GO:0046983 protein dimerization activity;
A6QPX8	RAB12 protein OS=Bos taurus OX=9913 GN=RAB12 PE=2 SV=1	RAB12	1.5104	Up	27.2855	42878.9	64764.4	0.796685	1.20331	cytoplasm	K07907	RAB12; Ras-related protein Rab-12		GO:0002376 immune system process; GO:0006807 nitrogen compound metabolic process; GO:0006810 transport; GO:0006950 response to stress; GO:0006952 defense response; GO:0006955 immune response; GO:0007034 vacuolar transport; GO:0007041 lysosomal transport; GO:0008152 metabolic process; GO:0008333 endosome to lysosome transport; GO:0009056 catabolic process; GO:0009057 macromolecule catabolic proces…	GO:0000323 lytic vacuole; GO:0005622 intracellular anatomical structure; GO:0005737 cytoplasm; GO:0005764 lysosome; GO:0005768 endosome; GO:0005773 vacuole; GO:0005776 autophagosome; GO:0005794 Golgi apparatus; GO:0005829 cytosol; GO:0010008 endosome membrane; GO:0012505 endomembrane system; GO:0016020 membrane; GO:0030139 endocytic vesicle; GO:0030141 secretory granule; GO:0031090 organelle memb…	GO:0000166 nucleotide binding; GO:0001882 nucleoside binding; GO:0001883 purine nucleoside binding; GO:0005488 binding; GO:0005525 GTP binding; GO:0017076 purine nucleotide binding; GO:0019001 guanyl nucleotide binding; GO:0019003 GDP binding; GO:0032549 ribonucleoside binding; GO:0032550 purine ribonucleoside binding; GO:0032553 ribonucleotide binding; GO:0032555 purine ribonucleotide binding; G…	PF00071	PF00071 Ras family	R	KOG0395	Ras-related GTPase
A6QQR1	NOP2/Sun RNA methyltransferase 5 OS=Bos taurus OX=9913 GN=NSUN5 PE=2 SV=1	NSUN5	1.61936	Up	49.9937	6075.27	9838.06	0.763544	1.23646	cytoplasm	K15264	NSUN5, WBSCR20, RCM1; 25S rRNA (cytosine2278-C5)-methyltransferase [EC:2.1.1.311]		GO:0000154 rRNA modification; GO:0001510 RNA methylation; GO:0006139 nucleobase-containing compound metabolic process; GO:0006364 rRNA processing; GO:0006396 RNA processing; GO:0006725 cellular aromatic compound metabolic process; GO:0006807 nitrogen compound metabolic process; GO:0008152 metabolic process; GO:0009451 RNA modification; GO:0009987 cellular process; GO:0010467 gene expression; GO:0…	GO:0005622 intracellular anatomical structure; GO:0005634 nucleus; GO:0005730 nucleolus; GO:0031974 membrane-enclosed lumen; GO:0031981 nuclear lumen; GO:0043226 organelle; GO:0043227 membrane-bounded organelle; GO:0043228 non-membrane-bounded organelle; GO:0043229 intracellular organelle; GO:0043231 intracellular membrane-bounded organelle; GO:0043232 intracellular non-membrane-bounded organelle…	GO:0003824 catalytic activity; GO:0008168 methyltransferase activity; GO:0008173 RNA methyltransferase activity; GO:0008757 S-adenosylmethionine-dependent methyltransferase activity; GO:0016740 transferase activity; GO:0016741 transferase activity, transferring one-carbon groups; GO:0140098 catalytic activity, acting on RNA;			D	KOG2360	Proliferation-associated nucleolar protein (NOL1)
A6QR05	Decaprenyl diphosphate synthase subunit 2 OS=Bos taurus OX=9913 GN=PDSS2 PE=2 SV=1	PDSS2	2.19731	Up	43.5843	10337.2	22714	0.625526	1.37447	mitochondria	K12505	PDSS2; decaprenyl-diphosphate synthase subunit 2 [EC:2.5.1.91]	map00900 Terpenoid backbone biosynthesis	GO:0006629 lipid metabolic process; GO:0006720 isoprenoid metabolic process; GO:0006743 ubiquinone metabolic process; GO:0006744 ubiquinone biosynthetic process; GO:0008152 metabolic process; GO:0008299 isoprenoid biosynthetic process; GO:0008610 lipid biosynthetic process; GO:0009058 biosynthetic process; GO:0009987 cellular process; GO:0016043 cellular component organization; GO:0022607 cellula…	GO:0005622 intracellular anatomical structure; GO:0005737 cytoplasm; GO:0005739 mitochondrion; GO:0005759 mitochondrial matrix; GO:0005829 cytosol; GO:0031974 membrane-enclosed lumen; GO:0032991 protein-containing complex; GO:0043226 organelle; GO:0043227 membrane-bounded organelle; GO:0043229 intracellular organelle; GO:0043231 intracellular membrane-bounded organelle; GO:0043233 organelle lumen…	GO:0005488 binding; GO:0005515 protein binding; GO:0046982 protein heterodimerization activity; GO:0046983 protein dimerization activity;	PF00348	PF00348 Polyprenyl synthetase	H	KOG0776	Geranylgeranyl pyrophosphate synthase/Polyprenyl synthetase
A7MBI8	NUDT9 protein OS=Bos taurus OX=9913 GN=NUDT9 PE=2 SV=1	NUDT9	0.596221	Down	38.6124	24139.9	14392.7	1.25296	0.747041	nucleus	K13988	NUDT9; ADP-ribose pyrophosphatase [EC:3.6.1.13]	map00230 Purine metabolism; map01100 Metabolic pathways	GO:0006139 nucleobase-containing compound metabolic process; GO:0006163 purine nucleotide metabolic process; GO:0006195 purine nucleotide catabolic process; GO:0006725 cellular aromatic compound metabolic process; GO:0006753 nucleoside phosphate metabolic process; GO:0006793 phosphorus metabolic process; GO:0006796 phosphate-containing compound metabolic process; GO:0006807 nitrogen compound meta…	GO:0005622 intracellular anatomical structure; GO:0005737 cytoplasm; GO:0005739 mitochondrion; GO:0005759 mitochondrial matrix; GO:0031974 membrane-enclosed lumen; GO:0043226 organelle; GO:0043227 membrane-bounded organelle; GO:0043229 intracellular organelle; GO:0043231 intracellular membrane-bounded organelle; GO:0043233 organelle lumen; GO:0070013 intracellular organelle lumen;	GO:0003824 catalytic activity; GO:0016462 pyrophosphatase activity; GO:0016787 hydrolase activity; GO:0016817 hydrolase activity, acting on acid anhydrides; GO:0016818 hydrolase activity, acting on acid anhydrides, in phosphorus-containing anhydrides; GO:0017110 nucleoside-diphosphatase activity; GO:0019144 ADP-sugar diphosphatase activity; GO:0043262 adenosine-diphosphatase activity; GO:0047631 …	PF00293	PF00293 NUDIX domain	P	KOG4195	Transient receptor potential-related channel 7
A7Z054	TXNIP protein OS=Bos taurus OX=9913 GN=TXNIP PE=2 SV=1	TXNIP	1.58741	Up	43.6422	47664.4	75663.2	0.772972	1.22703	cytoplasm	K20910	TXNIP; thioredoxin-interacting protein	map04621 NOD-like receptor signaling pathway	GO:0000122 negative regulation of transcription by RNA polymerase II; GO:0000302 response to reactive oxygen species; GO:0002347 response to tumor cell; GO:0006355 regulation of transcription, DNA-templated; GO:0006357 regulation of transcription by RNA polymerase II; GO:0006606 protein import into nucleus; GO:0006810 transport; GO:0006886 intracellular protein transport; GO:0006913 nucleocytopla…	GO:0005622 intracellular anatomical structure; GO:0005634 nucleus; GO:0005737 cytoplasm; GO:0005739 mitochondrion; GO:0005740 mitochondrial envelope; GO:0005758 mitochondrial intermembrane space; GO:0005829 cytosol; GO:0031967 organelle envelope; GO:0031970 organelle envelope lumen; GO:0031974 membrane-enclosed lumen; GO:0031975 envelope; GO:0043226 organelle; GO:0043227 membrane-bounded organell…	GO:0004857 enzyme inhibitor activity; GO:0005488 binding; GO:0005515 protein binding; GO:0019899 enzyme binding; GO:0030234 enzyme regulator activity; GO:0031625 ubiquitin protein ligase binding; GO:0044389 ubiquitin-like protein ligase binding; GO:0098772 molecular function regulator;	PF00339; PF02752	PF00339 Arrestin (or S-antigen), N-terminal domain; PF02752 Arrestin (or S-antigen), C-terminal domain	R	KOG3780	Thioredoxin binding protein TBP-2/VDUP1
A8YXZ8	Mitochondrial import receptor subunit TOM5 homolog OS=Bos taurus OX=9913 GN=TOMM5 PE=3 SV=1	TOMM5	1.53	Up	6.0353	12183.8	18641.2	0.790514	1.20949	cytoplasm	K17773	TOM5; mitochondrial import receptor subunit TOM5		GO:0006605 protein targeting; GO:0006626 protein targeting to mitochondrion; GO:0006810 transport; GO:0006839 mitochondrial transport; GO:0006886 intracellular protein transport; GO:0006996 organelle organization; GO:0007005 mitochondrion organization; GO:0008104 protein localization; GO:0009987 cellular process; GO:0015031 protein transport; GO:0015833 peptide transport; GO:0016043 cellular comp…	GO:0005622 intracellular anatomical structure; GO:0005737 cytoplasm; GO:0005739 mitochondrion; GO:0005740 mitochondrial envelope; GO:0005741 mitochondrial outer membrane; GO:0005742 mitochondrial outer membrane translocase complex; GO:0016020 membrane; GO:0019867 outer membrane; GO:0031090 organelle membrane; GO:0031966 mitochondrial membrane; GO:0031967 organelle envelope; GO:0031968 organelle o…
E1B756	GDP-Man:Man(3)GlcNAc(2)-PP-Dol alpha-1,2-mannosyltransferase OS=Bos taurus OX=9913 GN=ALG11 PE=3 SV=3	ALG11	1.98472	Up	56.4015	42454.7	84260.5	0.67008	1.32992	plasma membrane	K03844	ALG11; alpha-1,2-mannosyltransferase [EC:2.4.1.131]	map00510 N-Glycan biosynthesis; map00513 Various types of N-glycan biosynthesis; map01100 Metabolic pathways	GO:0006464 cellular protein modification process; GO:0006486 protein glycosylation; GO:0006490 oligosaccharide-lipid intermediate biosynthetic process; GO:0006629 lipid metabolic process; GO:0006807 nitrogen compound metabolic process; GO:0008152 metabolic process; GO:0009058 biosynthetic process; GO:0009059 macromolecule biosynthetic process; GO:0009100 glycoprotein metabolic process; GO:0009101…	GO:0005622 intracellular anatomical structure; GO:0005737 cytoplasm; GO:0005783 endoplasmic reticulum; GO:0005789 endoplasmic reticulum membrane; GO:0012505 endomembrane system; GO:0016020 membrane; GO:0031984 organelle subcompartment; GO:0042175 nuclear outer membrane-endoplasmic reticulum membrane network; GO:0043226 organelle; GO:0043227 membrane-bounded organelle; GO:0043229 intracellular org…	GO:0000026 alpha-1,2-mannosyltransferase activity; GO:0000030 mannosyltransferase activity; GO:0003824 catalytic activity; GO:0004376 glycolipid mannosyltransferase activity; GO:0004377 GDP-Man:Man3GlcNAc2-PP-Dol alpha-1,2-mannosyltransferase activity; GO:0016740 transferase activity; GO:0016757 glycosyltransferase activity; GO:0016758 hexosyltransferase activity;			M	KOG1387	Glycosyltransferase
E1B9H1	Tubulointerstitial nephritis antigen like 1 OS=Bos taurus OX=9913 GN=TINAGL1 PE=3 SV=1	TINAGL1	0.656536	Down	52.903	17914.3	11761.4	1.20734	0.792662	extracellular				GO:0006810 transport; GO:0007155 cell adhesion; GO:0008104 protein localization; GO:0009966 regulation of signal transduction; GO:0009967 positive regulation of signal transduction; GO:0010646 regulation of cell communication; GO:0010647 positive regulation of cell communication; GO:0016192 vesicle-mediated transport; GO:0016197 endosomal transport; GO:0022610 biological adhesion; GO:0023051 regu…	GO:0005576 extracellular region; GO:0005615 extracellular space; GO:0005622 intracellular anatomical structure; GO:0005737 cytoplasm; GO:0030312 external encapsulating structure; GO:0042600 egg chorion; GO:0071944 cell periphery;	GO:0005198 structural molecule activity; GO:0005201 extracellular matrix structural constituent; GO:0005488 binding; GO:0005515 protein binding; GO:0017147 Wnt-protein binding; GO:0043236 laminin binding; GO:0050840 extracellular matrix binding;	PF00112	PF00112 Papain family cysteine protease	R	KOG1544	Predicted cysteine proteinase TIN-ag
E1BBB3	UDP-glucuronosyltransferase OS=Bos taurus OX=9913 GN=LOC100138004 PE=1 SV=3	LOC100138004	1.73846	Up	61.0164	143503	249474	0.730338	1.26966	peroxisome	K00699	UGT; glucuronosyltransferase [EC:2.4.1.17]	map00040 Pentose and glucuronate interconversions; map00053 Ascorbate and aldarate metabolism; map00140 Steroid hormone biosynthesis; map00830 Retinol metabolism; map00860 Porphyrin metabolism; map00980 Metabolism of xenobiotics by cytochrome P450; map00982 Drug metabolism - cytochrome P450; map00983 Drug metabolism - other enzymes; map01100 Metabolic pathways; map01240 Biosynthesis of cofactors;…	GO:0002237 response to molecule of bacterial origin; GO:0005975 carbohydrate metabolic process; GO:0005996 monosaccharide metabolic process; GO:0006011 UDP-glucose metabolic process; GO:0006063 uronic acid metabolic process; GO:0006082 organic acid metabolic process; GO:0006139 nucleobase-containing compound metabolic process; GO:0006629 lipid metabolic process; GO:0006725 cellular aromatic compo…	GO:0005622 intracellular anatomical structure; GO:0005634 nucleus; GO:0005635 nuclear envelope; GO:0005640 nuclear outer membrane; GO:0005737 cytoplasm; GO:0005783 endoplasmic reticulum; GO:0012505 endomembrane system; GO:0016020 membrane; GO:0016021 integral component of membrane; GO:0019867 outer membrane; GO:0031090 organelle membrane; GO:0031224 intrinsic component of membrane; GO:0031965 nuc…	GO:0003824 catalytic activity; GO:0008194 UDP-glycosyltransferase activity; GO:0015020 glucuronosyltransferase activity; GO:0016740 transferase activity; GO:0016757 glycosyltransferase activity; GO:0016758 hexosyltransferase activity;			GC	KOG1192	UDP-glucuronosyl and UDP-glucosyl transferase
E1BBR6	FYVE and coiled-coil domain autophagy adaptor 1 OS=Bos taurus OX=9913 GN=FYCO1 PE=4 SV=2	FYCO1	1.54066	Up	164.308	18748.8	28885.5	0.787198	1.2128	cytoplasm	K21954	FYCO1; FYVE and coiled-coil domain-containing protein 1		GO:0006457 protein folding; GO:0006458 'de novo' protein folding; GO:0006810 transport; GO:0006928 movement of cell or subcellular component; GO:0007017 microtubule-based process; GO:0007018 microtubule-based movement; GO:0009893 positive regulation of metabolic process; GO:0009894 regulation of catabolic process; GO:0009896 positive regulation of catabolic process; GO:0009987 cellular process; G…	GO:0000323 lytic vacuole; GO:0005622 intracellular anatomical structure; GO:0005737 cytoplasm; GO:0005764 lysosome; GO:0005768 endosome; GO:0005770 late endosome; GO:0005773 vacuole; GO:0005776 autophagosome; GO:0005794 Golgi apparatus; GO:0012505 endomembrane system; GO:0031410 cytoplasmic vesicle; GO:0031982 vesicle; GO:0043226 organelle; GO:0043227 membrane-bounded organelle; GO:0043229 intrac…	GO:0005488 binding; GO:0005515 protein binding; GO:0044183 protein folding chaperone; GO:0051082 unfolded protein binding;	PF01363	PF01363 FYVE zinc finger	R	KOG1729	FYVE finger containing protein
E1BDA1	Ras and Rab interactor 1 OS=Bos taurus OX=9913 GN=RIN1 PE=3 SV=2	RIN1	1.54052	Up	92.446	34649.1	53377.5	0.787242	1.21276	nucleus	K17638	RIN1; Ras and Rab interactor 1	map04014 Ras signaling pathway	GO:0003008 system process; GO:0007154 cell communication; GO:0007165 signal transduction; GO:0007610 behavior; GO:0007611 learning or memory; GO:0007612 learning; GO:0007613 memory; GO:0008306 associative learning; GO:0009987 cellular process; GO:0010646 regulation of cell communication; GO:0023051 regulation of signaling; GO:0023052 signaling; GO:0031914 negative regulation of synaptic plasticit…	GO:0005622 intracellular anatomical structure; GO:0005737 cytoplasm; GO:0005829 cytosol; GO:0005886 plasma membrane; GO:0016020 membrane; GO:0030425 dendrite; GO:0036477 somatodendritic compartment; GO:0042995 cell projection; GO:0043005 neuron projection; GO:0043025 neuronal cell body; GO:0044297 cell body; GO:0071944 cell periphery; GO:0097447 dendritic tree; GO:0120025 plasma membrane bounded …	GO:0005085 guanyl-nucleotide exchange factor activity; GO:0005488 binding; GO:0005515 protein binding; GO:0019899 enzyme binding; GO:0031267 small GTPase binding; GO:0051020 GTPase binding; GO:0098772 molecular function regulator;			U	KOG2320	RAS effector RIN1 (contains VPS domain)
E1BDG6	RAB11 family interacting protein 4 OS=Bos taurus OX=9913 GN=RAB11FIP4 PE=4 SV=2	RAB11FIP4	1.55981	Up	67.3729	21291.8	33211.2	0.781308	1.21869	nucleus	K12485	RAB11FIP3_4; Rab11 family-interacting protein 3/4	map04144 Endocytosis	GO:0000910 cytokinesis; GO:0000912 assembly of actomyosin apparatus involved in cytokinesis; GO:0000915 actomyosin contractile ring assembly; GO:0001654 eye development; GO:0001709 cell fate determination; GO:0003002 regionalization; GO:0003407 neural retina development; GO:0006996 organelle organization; GO:0007010 cytoskeleton organization; GO:0007017 microtubule-based process; GO:0007049 cell …	GO:0005622 intracellular anatomical structure; GO:0005737 cytoplasm; GO:0005768 endosome; GO:0005813 centrosome; GO:0005815 microtubule organizing center; GO:0005856 cytoskeleton; GO:0005875 microtubule associated complex; GO:0005886 plasma membrane; GO:0005938 cell cortex; GO:0010008 endosome membrane; GO:0012505 endomembrane system; GO:0015630 microtubule cytoskeleton; GO:0016020 membrane; GO:0…	GO:0005488 binding; GO:0005515 protein binding; GO:0008017 microtubule binding; GO:0008092 cytoskeletal protein binding; GO:0015631 tubulin binding; GO:0019899 enzyme binding; GO:0031267 small GTPase binding; GO:0042802 identical protein binding; GO:0042803 protein homodimerization activity; GO:0046983 protein dimerization activity; GO:0051020 GTPase binding;			DZ	KOG0982	Centrosomal protein Nuf
E1BEW6	Exosome component 7 OS=Bos taurus OX=9913 GN=EXOSC7 PE=4 SV=1	EXOSC7	0.523955	Down	31.7413	16791	8797.71	1.31237	0.687625	nucleus	K12589	RRP42, EXOSC7; exosome complex component RRP42	map03018 RNA degradation	GO:0000288 nuclear-transcribed mRNA catabolic process, deadenylation-dependent decay; GO:0000291 nuclear-transcribed mRNA catabolic process, exonucleolytic; GO:0000459 exonucleolytic trimming involved in rRNA processing; GO:0000460 maturation of 5.8S rRNA; GO:0000466 maturation of 5.8S rRNA from tricistronic rRNA transcript (SSU-rRNA, 5.8S rRNA, LSU-rRNA); GO:0000467 exonucleolytic trimming to ge…	GO:0000176 nuclear exosome (RNase complex); GO:0000177 cytoplasmic exosome (RNase complex); GO:0000178 exosome (RNase complex); GO:0005622 intracellular anatomical structure; GO:0005634 nucleus; GO:0005652 nuclear lamina; GO:0005654 nucleoplasm; GO:0005737 cytoplasm; GO:0005829 cytosol; GO:0031974 membrane-enclosed lumen; GO:0031981 nuclear lumen; GO:0032991 protein-containing complex; GO:0034399…	GO:0000175 3'-5'-exoribonuclease activity; GO:0003676 nucleic acid binding; GO:0003723 RNA binding; GO:0003824 catalytic activity; GO:0004518 nuclease activity; GO:0004527 exonuclease activity; GO:0004532 exoribonuclease activity; GO:0004540 ribonuclease activity; GO:0005488 binding; GO:0008408 3'-5' exonuclease activity; GO:0016787 hydrolase activity; GO:0016788 hydrolase activity, acting on est…	PF01138; PF03725	PF01138 3' exoribonuclease family, domain 1; PF03725 3' exoribonuclease family, domain 2	J	KOG1612	Exosomal 3'-5' exoribonuclease complex, subunit Rrp42
E1BFB5	ribonuclease P OS=Bos taurus OX=9913 GN=PRORP PE=3 SV=2	PRORP	0.433166	Down	67.7311	6965.44	3017.19	1.39551	0.604488	mitochondria	K17655	MRPP3; mitochondrial ribonuclease P protein 3		GO:0000959 mitochondrial RNA metabolic process; GO:0000963 mitochondrial RNA processing; GO:0000964 mitochondrial RNA 5'-end processing; GO:0000966 RNA 5'-end processing; GO:0001682 tRNA 5'-leader removal; GO:0006139 nucleobase-containing compound metabolic process; GO:0006396 RNA processing; GO:0006399 tRNA metabolic process; GO:0006725 cellular aromatic compound metabolic process; GO:0006807 ni…	GO:0005622 intracellular anatomical structure; GO:0005634 nucleus; GO:0005737 cytoplasm; GO:0005739 mitochondrion; GO:0005759 mitochondrial matrix; GO:0009295 nucleoid; GO:0030677 ribonuclease P complex; GO:0030678 mitochondrial ribonuclease P complex; GO:0031974 membrane-enclosed lumen; GO:0032991 protein-containing complex; GO:0042645 mitochondrial nucleoid; GO:0043226 organelle; GO:0043227 mem…	GO:0003824 catalytic activity; GO:0004518 nuclease activity; GO:0004519 endonuclease activity; GO:0004521 endoribonuclease activity; GO:0004526 ribonuclease P activity; GO:0004540 ribonuclease activity; GO:0004549 tRNA-specific ribonuclease activity; GO:0016787 hydrolase activity; GO:0016788 hydrolase activity, acting on ester bonds; GO:0016891 endoribonuclease activity, producing 5'-phosphomonoe…	PF16953	PF16953 Protein-only RNase P
E1BIA9	TATA-box binding protein associated factor 3 OS=Bos taurus OX=9913 GN=TAF3 PE=4 SV=1	TAF3	2.40405	Up	103.879	15084.5	36264	0.587535	1.41247	nucleus	K14650	TAF3; transcription initiation factor TFIID subunit 3	map03022 Basal transcription factors	GO:0000122 negative regulation of transcription by RNA polymerase II; GO:0006139 nucleobase-containing compound metabolic process; GO:0006351 transcription, DNA-templated; GO:0006352 DNA-templated transcription, initiation; GO:0006355 regulation of transcription, DNA-templated; GO:0006357 regulation of transcription by RNA polymerase II; GO:0006366 transcription by RNA polymerase II; GO:0006367 t…	GO:0000428 DNA-directed RNA polymerase complex; GO:0005622 intracellular anatomical structure; GO:0005634 nucleus; GO:0005635 nuclear envelope; GO:0005654 nucleoplasm; GO:0005667 transcription regulator complex; GO:0005669 transcription factor TFIID complex; GO:0012505 endomembrane system; GO:0016020 membrane; GO:0016591 RNA polymerase II, holoenzyme; GO:0030880 RNA polymerase complex; GO:0031090…	GO:0002039 p53 binding; GO:0003682 chromatin binding; GO:0005488 binding; GO:0005515 protein binding; GO:0008134 transcription factor binding; GO:0019904 protein domain specific binding; GO:0031208 POZ domain binding;	PF07524; PF00628	PF07524 Bromodomain associated; PF00628 PHD-finger	K	KOG2389	Predicted bromodomain transcription factor
E1BIS6	Synemin OS=Bos taurus OX=9913 GN=SYNM PE=1 SV=2	SYNM	0.460428	Down	170.786	8945.18	4118.61	1.36946	0.630538	nucleus	K10376	DMN; desmuslin		GO:0003008 system process; GO:0003009 skeletal muscle contraction; GO:0003010 voluntary skeletal muscle contraction; GO:0003012 muscle system process; GO:0006936 muscle contraction; GO:0006941 striated muscle contraction; GO:0006996 organelle organization; GO:0007010 cytoskeleton organization; GO:0009987 cellular process; GO:0014721 twitch skeletal muscle contraction; GO:0016043 cellular componen…	GO:0005622 intracellular anatomical structure; GO:0005737 cytoplasm; GO:0005856 cytoskeleton; GO:0005882 intermediate filament; GO:0005886 plasma membrane; GO:0005912 adherens junction; GO:0016020 membrane; GO:0030016 myofibril; GO:0030017 sarcomere; GO:0030018 Z disc; GO:0030054 cell junction; GO:0031674 I band; GO:0042383 sarcolemma; GO:0043034 costamere; GO:0043226 organelle; GO:0043228 non-me…	GO:0005198 structural molecule activity; GO:0005200 structural constituent of cytoskeleton; GO:0005488 binding; GO:0005515 protein binding; GO:0008092 cytoskeletal protein binding; GO:0008307 structural constituent of muscle; GO:0017166 vinculin binding; GO:0019215 intermediate filament binding; GO:0030674 protein-macromolecule adaptor activity; GO:0044877 protein-containing complex binding; GO:0…
E1BKE9	SUMO specific peptidase 3 OS=Bos taurus OX=9913 GN=SENP3 PE=3 SV=2	SENP3	0.658165	Down	68.1315	15882.2	10453.1	1.20615	0.793847	nucleus	K08593	SENP3; sentrin-specific protease 3 [EC:3.4.22.68]		GO:0006139 nucleobase-containing compound metabolic process; GO:0006364 rRNA processing; GO:0006396 RNA processing; GO:0006464 cellular protein modification process; GO:0006508 proteolysis; GO:0006725 cellular aromatic compound metabolic process; GO:0006807 nitrogen compound metabolic process; GO:0008152 metabolic process; GO:0009987 cellular process; GO:0010467 gene expression; GO:0016070 RNA me…	GO:0005622 intracellular anatomical structure; GO:0005634 nucleus; GO:0005654 nucleoplasm; GO:0005730 nucleolus; GO:0031974 membrane-enclosed lumen; GO:0031981 nuclear lumen; GO:0032991 protein-containing complex; GO:0034708 methyltransferase complex; GO:0035097 histone methyltransferase complex; GO:0043226 organelle; GO:0043227 membrane-bounded organelle; GO:0043228 non-membrane-bounded organell…	GO:0003824 catalytic activity; GO:0004175 endopeptidase activity; GO:0004843 thiol-dependent deubiquitinase; GO:0008233 peptidase activity; GO:0008234 cysteine-type peptidase activity; GO:0016787 hydrolase activity; GO:0019783 ubiquitin-like protein-specific protease activity; GO:0101005 deubiquitinase activity; GO:0140096 catalytic activity, acting on a protein;	PF19722; PF02902	PF19722 Sentrin-specific protease 3/5 N-terminal; PF02902 Ulp1 protease family, C-terminal catalytic domain	O	KOG0778	Protease, Ulp1 family
E1BLU0	Cytochrome b5 domain containing 2 OS=Bos taurus OX=9913 GN=CYB5D2 PE=4 SV=3	CYB5D2	1.62389	Up	29.2001	8473	13759.2	0.762228	1.23777	extracellular				GO:0007275 multicellular organism development; GO:0007399 nervous system development; GO:0009987 cellular process; GO:0010720 positive regulation of cell development; GO:0022008 neurogenesis; GO:0030154 cell differentiation; GO:0032501 multicellular organismal process; GO:0032502 developmental process; GO:0045595 regulation of cell differentiation; GO:0045597 positive regulation of cell different…	GO:0005576 extracellular region; GO:0012505 endomembrane system; GO:0016020 membrane;	GO:0005488 binding; GO:0020037 heme binding; GO:0046906 tetrapyrrole binding; GO:0097159 organic cyclic compound binding; GO:1901363 heterocyclic compound binding;	PF00173	PF00173 Cytochrome b5-like Heme/Steroid binding domain	R	KOG1110	Putative steroid membrane receptor Hpr6.6/25-Dx
E1BMC8	ISY1 splicing factor homolog (S. cerevisiae) OS=Bos taurus OX=9913 GN=ISY1 PE=3 SV=1	ISY1	0.607894	Down	32.6358	8691.63	5283.59	1.24386	0.756137	nucleus	K12870	ISY1; pre-mRNA-splicing factor ISY1	map03040 Spliceosome	GO:0000245 spliceosomal complex assembly; GO:0000350 generation of catalytic spliceosome for second transesterification step; GO:0000375 RNA splicing, via transesterification reactions; GO:0000377 RNA splicing, via transesterification reactions with bulged adenosine as nucleophile; GO:0000389 mRNA 3'-splice site recognition; GO:0000393 spliceosomal conformational changes to generate catalytic con…	GO:0000974 Prp19 complex; GO:0005622 intracellular anatomical structure; GO:0005634 nucleus; GO:0005654 nucleoplasm; GO:0005681 spliceosomal complex; GO:0031974 membrane-enclosed lumen; GO:0031981 nuclear lumen; GO:0032991 protein-containing complex; GO:0043226 organelle; GO:0043227 membrane-bounded organelle; GO:0043229 intracellular organelle; GO:0043231 intracellular membrane-bounded organelle…	GO:0003676 nucleic acid binding; GO:0003723 RNA binding; GO:0005488 binding; GO:0097159 organic cyclic compound binding; GO:1901363 heterocyclic compound binding;			A	KOG3068	mRNA splicing factor
E1BML6	Solute carrier family 2 member 13 OS=Bos taurus OX=9913 GN=SLC2A13 PE=3 SV=1	SLC2A13	1.56019	Up	70.5541	11081.4	17289	0.781193	1.21881	plasma membrane	K08150	SLC2A13, ITR; MFS transporter, SP family, solute carrier family 2 (myo-inositol transporter), member 13		GO:0006810 transport; GO:0006811 ion transport; GO:0006812 cation transport; GO:0008643 carbohydrate transport; GO:0008645 hexose transmembrane transport; GO:0015749 monosaccharide transmembrane transport; GO:0015791 polyol transport; GO:0015798 myo-inositol transport; GO:0015850 organic hydroxy compound transport; GO:0034219 carbohydrate transmembrane transport; GO:0034220 ion transmembrane tran…	GO:0005886 plasma membrane; GO:0016020 membrane; GO:0071944 cell periphery;	GO:0005215 transporter activity; GO:0005351 carbohydrate:proton symporter activity; GO:0005355 glucose transmembrane transporter activity; GO:0005365 myo-inositol transmembrane transporter activity; GO:0005366 myo-inositol:proton symporter activity; GO:0005402 carbohydrate:cation symporter activity; GO:0008324 cation transmembrane transporter activity; GO:0015075 ion transmembrane transporter act…			R	KOG0254	Predicted transporter (major facilitator superfamily)
E1BMN6	Sulfotransferase OS=Bos taurus OX=9913 GN=CHST2 PE=3 SV=2	CHST2	1.544	Up	57.643	15098.8	23312.6	0.786163	1.21384	mitochondria	K04745	CHST2; carbohydrate 6-sulfotransferase 2 [EC:2.8.2.-]	map00533 Glycosaminoglycan biosynthesis - keratan sulfate	GO:0006022 aminoglycan metabolic process; GO:0006023 aminoglycan biosynthetic process; GO:0006024 glycosaminoglycan biosynthetic process; GO:0006040 amino sugar metabolic process; GO:0006044 N-acetylglucosamine metabolic process; GO:0006082 organic acid metabolic process; GO:0006790 sulfur compound metabolic process; GO:0006807 nitrogen compound metabolic process; GO:0006950 response to stress; G…	GO:0000139 Golgi membrane; GO:0005622 intracellular anatomical structure; GO:0005737 cytoplasm; GO:0005794 Golgi apparatus; GO:0005802 trans-Golgi network; GO:0012505 endomembrane system; GO:0016020 membrane; GO:0016021 integral component of membrane; GO:0031090 organelle membrane; GO:0031224 intrinsic component of membrane; GO:0031228 intrinsic component of Golgi membrane; GO:0031300 intrinsic c…	GO:0001517 N-acetylglucosamine 6-O-sulfotransferase activity; GO:0003824 catalytic activity; GO:0008146 sulfotransferase activity; GO:0016740 transferase activity; GO:0016782 transferase activity, transferring sulphur-containing groups;	PF00685	PF00685 Sulfotransferase domain
E1BMY1	NADH dehydrogenase [ubiquinone] 1 beta subcomplex subunit 4 OS=Bos taurus OX=9913 PE=3 SV=2	--	2.15456	Up	14.9652	4955.66	10677.2	0.634004	1.366	plasma membrane	K03960	NDUFB4; NADH dehydrogenase (ubiquinone) 1 beta subcomplex subunit 4	map00190 Oxidative phosphorylation; map01100 Metabolic pathways; map04714 Thermogenesis; map04723 Retrograde endocannabinoid signaling	GO:0006091 generation of precursor metabolites and energy; GO:0006119 oxidative phosphorylation; GO:0006120 mitochondrial electron transport, NADH to ubiquinone; GO:0006139 nucleobase-containing compound metabolic process; GO:0006163 purine nucleotide metabolic process; GO:0006725 cellular aromatic compound metabolic process; GO:0006753 nucleoside phosphate metabolic process; GO:0006793 phosphoru…	GO:0005622 intracellular anatomical structure; GO:0005634 nucleus; GO:0005635 nuclear envelope; GO:0005737 cytoplasm; GO:0005739 mitochondrion; GO:0005740 mitochondrial envelope; GO:0005743 mitochondrial inner membrane; GO:0005746 mitochondrial respirasome; GO:0005747 mitochondrial respiratory chain complex I; GO:0012505 endomembrane system; GO:0016020 membrane; GO:0019866 organelle inner membran…	GO:0003824 catalytic activity; GO:0003954 NADH dehydrogenase activity; GO:0008137 NADH dehydrogenase (ubiquinone) activity; GO:0016491 oxidoreductase activity; GO:0016651 oxidoreductase activity, acting on NAD(P)H; GO:0016655 oxidoreductase activity, acting on NAD(P)H, quinone or similar compound as acceptor; GO:0050136 NADH dehydrogenase (quinone) activity;
E1BNE1	Lipid droplet-associated hydrolase OS=Bos taurus OX=9913 GN=LDAH PE=3 SV=2	LDAH	1.51581	Up	37.5603	46230.8	70077.3	0.794972	1.20503	cytoplasm				GO:0006996 organelle organization; GO:0009987 cellular process; GO:0010876 lipid localization; GO:0016043 cellular component organization; GO:0019915 lipid storage; GO:0030154 cell differentiation; GO:0030730 sequestering of triglyceride; GO:0032502 developmental process; GO:0033036 macromolecule localization; GO:0034389 lipid droplet organization; GO:0048869 cellular developmental process; GO:00…	GO:0005622 intracellular anatomical structure; GO:0005737 cytoplasm; GO:0005783 endoplasmic reticulum; GO:0005811 lipid droplet; GO:0012505 endomembrane system; GO:0043226 organelle; GO:0043227 membrane-bounded organelle; GO:0043228 non-membrane-bounded organelle; GO:0043229 intracellular organelle; GO:0043231 intracellular membrane-bounded organelle; GO:0043232 intracellular non-membrane-bounded…	GO:0003824 catalytic activity; GO:0016298 lipase activity; GO:0016787 hydrolase activity; GO:0016788 hydrolase activity, acting on ester bonds;			S	KOG3975	Uncharacterized conserved protein
E1BPZ7	F-box protein 38 OS=Bos taurus OX=9913 GN=FBXO38 PE=4 SV=2	FBXO38	0.640246	Down	133.976	10111.5	6473.86	1.21933	0.780671	nucleus	K10313	FBXO38, MOKA; F-box protein 38		GO:0007275 multicellular organism development; GO:0007399 nervous system development; GO:0009987 cellular process; GO:0010720 positive regulation of cell development; GO:0010975 regulation of neuron projection development; GO:0010976 positive regulation of neuron projection development; GO:0022008 neurogenesis; GO:0030154 cell differentiation; GO:0031344 regulation of cell projection organization…	GO:0005622 intracellular anatomical structure; GO:0005634 nucleus; GO:0005737 cytoplasm; GO:0043226 organelle; GO:0043227 membrane-bounded organelle; GO:0043229 intracellular organelle; GO:0043231 intracellular membrane-bounded organelle;		PF00646	PF00646 F-box domain
F1MBF8	WASH complex subunit 3 OS=Bos taurus OX=9913 GN=WASHC3 PE=3 SV=2	WASHC3	0.651596	Down	20.1708	38785.5	25272.5	1.21095	0.78905	cytoskeleton	K18463	CCDC53; WASH complex subunit CCDC53	map04144 Endocytosis; map04212 Longevity regulating pathway - worm	GO:0007275 multicellular organism development; GO:0007568 aging; GO:0008104 protein localization; GO:0008340 determination of adult lifespan; GO:0010259 multicellular organism aging; GO:0030155 regulation of cell adhesion; GO:0032501 multicellular organismal process; GO:0032502 developmental process; GO:0033036 macromolecule localization; GO:0045185 maintenance of protein location; GO:0045785 pos…	GO:0005622 intracellular anatomical structure; GO:0005737 cytoplasm; GO:0032991 protein-containing complex; GO:0071203 WASH complex;	GO:0005488 binding; GO:0005515 protein binding;			S	KOG4496	Predicted coiled-coil protein
F1MBF9	Serine incorporator 1 OS=Bos taurus OX=9913 GN=SERINC1 PE=3 SV=3	SERINC1	1.65722	Up	50.7293	22333.4	37011.3	0.752667	1.24733	plasma membrane	K23544	SERINC1; serine incorporator 1		GO:0003333 amino acid transmembrane transport; GO:0006575 cellular modified amino acid metabolic process; GO:0006629 lipid metabolic process; GO:0006643 membrane lipid metabolic process; GO:0006644 phospholipid metabolic process; GO:0006650 glycerophospholipid metabolic process; GO:0006658 phosphatidylserine metabolic process; GO:0006665 sphingolipid metabolic process; GO:0006793 phosphorus metab…	GO:0005622 intracellular anatomical structure; GO:0005737 cytoplasm; GO:0005783 endoplasmic reticulum; GO:0005789 endoplasmic reticulum membrane; GO:0005886 plasma membrane; GO:0012505 endomembrane system; GO:0016020 membrane; GO:0031984 organelle subcompartment; GO:0042175 nuclear outer membrane-endoplasmic reticulum membrane network; GO:0043226 organelle; GO:0043227 membrane-bounded organelle; …	GO:0005215 transporter activity; GO:0005342 organic acid transmembrane transporter activity; GO:0005488 binding; GO:0005515 protein binding; GO:0008324 cation transmembrane transporter activity; GO:0008509 anion transmembrane transporter activity; GO:0008514 organic anion transmembrane transporter activity; GO:0015075 ion transmembrane transporter activity; GO:0015171 amino acid transmembrane tra…			S	KOG2592	Tumor differentially expressed (TDE) protein
F1MFA7	Coiled-coil domain containing 186 OS=Bos taurus OX=9913 GN=CCDC186 PE=4 SV=3	CCDC186	1.58843	Up	103.457	7683.6	12204.9	0.772668	1.22733	nucleus				GO:0006996 organelle organization; GO:0009987 cellular process; GO:0010256 endomembrane system organization; GO:0016043 cellular component organization; GO:0016050 vesicle organization; GO:0021700 developmental maturation; GO:0032502 developmental process; GO:0033363 secretory granule organization; GO:0040012 regulation of locomotion; GO:0050789 regulation of biological process; GO:0050795 regula…	GO:0005622 intracellular anatomical structure; GO:0005737 cytoplasm; GO:0005794 Golgi apparatus; GO:0005802 trans-Golgi network; GO:0012505 endomembrane system; GO:0030424 axon; GO:0031984 organelle subcompartment; GO:0036477 somatodendritic compartment; GO:0042995 cell projection; GO:0043005 neuron projection; GO:0043025 neuronal cell body; GO:0043226 organelle; GO:0043227 membrane-bounded organ…	GO:0005488 binding; GO:0005515 protein binding; GO:0019899 enzyme binding; GO:0031267 small GTPase binding; GO:0051020 GTPase binding;			W	KOG1836	Extracellular matrix glycoprotein Laminin subunits alpha and gamma
F1MH70	Condensin complex subunit 2 OS=Bos taurus OX=9913 GN=NCAPH PE=3 SV=1	NCAPH	2.01352	Up	80.6938	5459.54	10992.9	0.663677	1.33632	nucleus	K06676	BRRN1, BRN1, CAPH; condensin complex subunit 2		GO:0000003 reproduction; GO:0000070 mitotic sister chromatid segregation; GO:0000278 mitotic cell cycle; GO:0000280 nuclear division; GO:0000819 sister chromatid segregation; GO:0001655 urogenital system development; GO:0001700 embryonic development via the syncytial blastoderm; GO:0002009 morphogenesis of an epithelium; GO:0006082 organic acid metabolic process; GO:0006091 generation of precurso…	GO:0000228 nuclear chromosome; GO:0000775 chromosome, centromeric region; GO:0000785 chromatin; GO:0000793 condensed chromosome; GO:0000794 condensed nuclear chromosome; GO:0000796 condensin complex; GO:0005622 intracellular anatomical structure; GO:0005634 nucleus; GO:0005694 chromosome; GO:0005737 cytoplasm; GO:0005829 cytosol; GO:0031974 membrane-enclosed lumen; GO:0031981 nuclear lumen; GO:00…	GO:0001671 ATPase activator activity; GO:0003682 chromatin binding; GO:0005488 binding; GO:0005515 protein binding; GO:0008047 enzyme activator activity; GO:0019899 enzyme binding; GO:0030234 enzyme regulator activity; GO:0044547 DNA topoisomerase binding; GO:0060589 nucleoside-triphosphatase regulator activity; GO:0060590 ATPase regulator activity; GO:0072586 DNA topoisomerase type II (double st…			BD	KOG2328	Chromosome condensation complex Condensin, subunit H
F1MKC7	Helicase with zinc finger OS=Bos taurus OX=9913 GN=HELZ PE=4 SV=3	HELZ	0.216645	Down	217.216	7053.28	1528.06	1.64386	0.356136	nucleus	K25168	HELZ; helicase with zinc finger domain [EC:3.6.4.-]					PF13086; PF13087	PF13086 AAA domain; PF13087 AAA domain	A	KOG1804	RNA helicase
F1MMU3	Bromodomain containing 3 OS=Bos taurus OX=9913 GN=BRD3 PE=4 SV=1	BRD3	1.54748	Up	79.0148	4607.25	7129.63	0.785089	1.21491	nucleus	K11721	BRD3; bromodomain-containing protein 3		GO:0000003 reproduction; GO:0000375 RNA splicing, via transesterification reactions; GO:0000377 RNA splicing, via transesterification reactions with bulged adenosine as nucleophile; GO:0000398 mRNA splicing, via spliceosome; GO:0000578 embryonic axis specification; GO:0000902 cell morphogenesis; GO:0000904 cell morphogenesis involved in differentiation; GO:0001708 cell fate specification; GO:0003…	GO:0000228 nuclear chromosome; GO:0000785 chromatin; GO:0005622 intracellular anatomical structure; GO:0005634 nucleus; GO:0005654 nucleoplasm; GO:0005694 chromosome; GO:0005730 nucleolus; GO:0016604 nuclear body; GO:0031974 membrane-enclosed lumen; GO:0031981 nuclear lumen; GO:0043226 organelle; GO:0043227 membrane-bounded organelle; GO:0043228 non-membrane-bounded organelle; GO:0043229 intracel…	GO:0003682 chromatin binding; GO:0005488 binding; GO:0005515 protein binding; GO:0032182 ubiquitin-like protein binding; GO:0032183 SUMO binding; GO:0042393 histone binding; GO:0070577 lysine-acetylated histone binding; GO:0140030 modification-dependent protein binding; GO:0140033 acetylation-dependent protein binding;	PF00439; PF17035	PF00439 Bromodomain; PF17035 Bromodomain extra-terminal - transcription regulation	K	KOG1474	Transcription initiation factor TFIID, subunit BDF1 and related bromodomain proteins
F1MN80	Pre-mRNA-splicing regulator WTAP OS=Bos taurus OX=9913 GN=WTAP PE=3 SV=1	WTAP	0.641529	Down	44.0264	18296.5	11737.7	1.21838	0.781624	nucleus	K22824	WTAP; pre-mRNA-splicing regulator WTAP		GO:0000003 reproduction; GO:0000375 RNA splicing, via transesterification reactions; GO:0000381 regulation of alternative mRNA splicing, via spliceosome; GO:0001510 RNA methylation; GO:0001654 eye development; GO:0003006 developmental process involved in reproduction; GO:0006139 nucleobase-containing compound metabolic process; GO:0006325 chromatin organization; GO:0006355 regulation of transcrip…	GO:0005622 intracellular anatomical structure; GO:0005634 nucleus; GO:0005635 nuclear envelope; GO:0005654 nucleoplasm; GO:0005737 cytoplasm; GO:0012505 endomembrane system; GO:0016020 membrane; GO:0016604 nuclear body; GO:0016607 nuclear speck; GO:0031090 organelle membrane; GO:0031965 nuclear membrane; GO:0031967 organelle envelope; GO:0031974 membrane-enclosed lumen; GO:0031975 envelope; GO:00…	GO:0005488 binding; GO:0005515 protein binding;			A	KOG2991	Splicing regulator
F1MNI4	RAB5B, member RAS onco family OS=Bos taurus OX=9913 GN=RAB5B PE=1 SV=2	RAB5B	1.63372	Up	23.7208	56027.1	91532.5	0.759382	1.24062	mitochondria	K07888	RAB5B; Ras-related protein Rab-5B	map04014 Ras signaling pathway; map04144 Endocytosis; map04145 Phagosome; map04962 Vasopressin-regulated water reabsorption	GO:0000003 reproduction; GO:0000902 cell morphogenesis; GO:0000904 cell morphogenesis involved in differentiation; GO:0001667 ameboidal-type cell migration; GO:0001700 embryonic development via the syncytial blastoderm; GO:0001775 cell activation; GO:0002009 morphogenesis of an epithelium; GO:0002064 epithelial cell development; GO:0002065 columnar/cuboidal epithelial cell differentiation; GO:000…	GO:0005576 extracellular region; GO:0005615 extracellular space; GO:0005622 intracellular anatomical structure; GO:0005737 cytoplasm; GO:0005768 endosome; GO:0005769 early endosome; GO:0005886 plasma membrane; GO:0005938 cell cortex; GO:0008021 synaptic vesicle; GO:0010008 endosome membrane; GO:0012505 endomembrane system; GO:0012506 vesicle membrane; GO:0016020 membrane; GO:0030133 transport ves…	GO:0000166 nucleotide binding; GO:0001882 nucleoside binding; GO:0001883 purine nucleoside binding; GO:0003824 catalytic activity; GO:0003924 GTPase activity; GO:0005488 binding; GO:0005515 protein binding; GO:0016462 pyrophosphatase activity; GO:0016787 hydrolase activity; GO:0016817 hydrolase activity, acting on acid anhydrides; GO:0016818 hydrolase activity, acting on acid anhydrides, in phosp…	PF00071	PF00071 Ras family	U	KOG0092	GTPase Rab5/YPT51 and related small G protein superfamily GTPases
F1MPV5	Nuclear transcription factor, X-box binding like 1 OS=Bos taurus OX=9913 GN=NFXL1 PE=3 SV=3	NFXL1	0.580769	Down	101.614	14700.1	8537.4	1.26521	0.734793	nucleus	K15683	NFXL1, OZFP; NF-X1-type zinc finger protein NFXL1		GO:0000122 negative regulation of transcription by RNA polymerase II; GO:0006139 nucleobase-containing compound metabolic process; GO:0006351 transcription, DNA-templated; GO:0006355 regulation of transcription, DNA-templated; GO:0006357 regulation of transcription by RNA polymerase II; GO:0006366 transcription by RNA polymerase II; GO:0006725 cellular aromatic compound metabolic process; GO:0006…	GO:0005622 intracellular anatomical structure; GO:0005634 nucleus; GO:0043226 organelle; GO:0043227 membrane-bounded organelle; GO:0043229 intracellular organelle; GO:0043231 intracellular membrane-bounded organelle;	GO:0000976 transcription cis-regulatory region binding; GO:0000977 RNA polymerase II transcription regulatory region sequence-specific DNA binding; GO:0000981 DNA-binding transcription factor activity, RNA polymerase II-specific; GO:0001067 transcription regulatory region nucleic acid binding; GO:0001227 DNA-binding transcription repressor activity, RNA polymerase II-specific; GO:0003676 nucleic …			K	KOG1952	Transcription factor NF-X1, contains NFX-type Zn2+-binding and R3H domains
F1MSF6	UTP3 small subunit processome component OS=Bos taurus OX=9913 GN=UTP3 PE=3 SV=2	UTP3	0.447503	Down	54.0705	52299.3	23404.1	1.38169	0.61831	nucleus	K14767	UTP3, SAS10; U3 small nucleolar RNA-associated protein 3		GO:0000462 maturation of SSU-rRNA from tricistronic rRNA transcript (SSU-rRNA, 5.8S rRNA, LSU-rRNA); GO:0006139 nucleobase-containing compound metabolic process; GO:0006364 rRNA processing; GO:0006396 RNA processing; GO:0006725 cellular aromatic compound metabolic process; GO:0006807 nitrogen compound metabolic process; GO:0007275 multicellular organism development; GO:0007399 nervous system deve…	GO:0005622 intracellular anatomical structure; GO:0005634 nucleus; GO:0005654 nucleoplasm; GO:0005730 nucleolus; GO:0030684 preribosome; GO:0031974 membrane-enclosed lumen; GO:0031981 nuclear lumen; GO:0032040 small-subunit processome; GO:0032991 protein-containing complex; GO:0043226 organelle; GO:0043227 membrane-bounded organelle; GO:0043228 non-membrane-bounded organelle; GO:0043229 intracell…		PF09368	PF09368 Sas10 C-terminal domain	B	KOG3118	Disrupter of silencing SAS10
F1MU27	RING-type E3 ubiquitin transferase OS=Bos taurus OX=9913 GN=MARCHF11 PE=4 SV=3	MARCHF11	1.67577	Up	43.6202	6777.33	11357.2	0.747449	1.25255	cytoplasm	K10659	MARCH4_9_11; E3 ubiquitin-protein ligase MARCH4/9/11 [EC:2.3.2.27]					PF12906	PF12906 RING-variant domain	A	KOG1609	Protein involved in mRNA turnover and stability
F1MUK4	CDK2 associated cullin domain 1 OS=Bos taurus OX=9913 GN=CACUL1 PE=3 SV=3	CACUL1	0.544481	Down	40.8626	9910.94	5396.32	1.29493	0.705066	cytoplasm				GO:0000082 G1/S transition of mitotic cell cycle; GO:0000278 mitotic cell cycle; GO:0001932 regulation of protein phosphorylation; GO:0001934 positive regulation of protein phosphorylation; GO:0007049 cell cycle; GO:0008284 positive regulation of cell population proliferation; GO:0009893 positive regulation of metabolic process; GO:0009987 cellular process; GO:0010562 positive regulation of phosp…	GO:0000151 ubiquitin ligase complex; GO:0005622 intracellular anatomical structure; GO:0031461 cullin-RING ubiquitin ligase complex; GO:0032991 protein-containing complex; GO:1902494 catalytic complex; GO:1990234 transferase complex;	GO:0005488 binding; GO:0005515 protein binding; GO:0019899 enzyme binding; GO:0019900 kinase binding; GO:0019901 protein kinase binding; GO:0031625 ubiquitin protein ligase binding; GO:0044389 ubiquitin-like protein ligase binding;			D	KOG2166	Cullins
F1MXK2	Nuclear FMR1 interacting protein 2 OS=Bos taurus OX=9913 GN=NUFIP2 PE=4 SV=2	NUFIP2	0.513319	Down	75.8761	20027.5	10280.5	1.3216	0.678402	nucleus					GO:0005622 intracellular anatomical structure; GO:0005634 nucleus; GO:0005654 nucleoplasm; GO:0005737 cytoplasm; GO:0005829 cytosol; GO:0005840 ribosome; GO:0005844 polysome; GO:0010494 cytoplasmic stress granule; GO:0016604 nuclear body; GO:0031974 membrane-enclosed lumen; GO:0031981 nuclear lumen; GO:0032991 protein-containing complex; GO:0035770 ribonucleoprotein granule; GO:0036464 cytoplasmi…	GO:0003676 nucleic acid binding; GO:0003723 RNA binding; GO:0005488 binding; GO:0097159 organic cyclic compound binding; GO:1901363 heterocyclic compound binding;
F1MXY9	Serine/arginine-rich-splicing factor 6 OS=Bos taurus OX=9913 GN=SRSF6 PE=4 SV=2	SRSF6	0.568728	Down	39.719	62231.2	35392.6	1.27492	0.725082	nucleus	K12893	SRSF4_5_6, SFRS4_5_6; serine/arginine-rich splicing factor 4/5/6	map03040 Spliceosome	GO:0000075 cell cycle checkpoint signaling; GO:0000245 spliceosomal complex assembly; GO:0000278 mitotic cell cycle; GO:0000375 RNA splicing, via transesterification reactions; GO:0000377 RNA splicing, via transesterification reactions with bulged adenosine as nucleophile; GO:0000380 alternative mRNA splicing, via spliceosome; GO:0000381 regulation of alternative mRNA splicing, via spliceosome; G…	GO:0000785 chromatin; GO:0005622 intracellular anatomical structure; GO:0005634 nucleus; GO:0005654 nucleoplasm; GO:0005694 chromosome; GO:0005700 polytene chromosome; GO:0016604 nuclear body; GO:0016607 nuclear speck; GO:0031974 membrane-enclosed lumen; GO:0031981 nuclear lumen; GO:0043226 organelle; GO:0043227 membrane-bounded organelle; GO:0043228 non-membrane-bounded organelle; GO:0043229 int…	GO:0003676 nucleic acid binding; GO:0003723 RNA binding; GO:0003729 mRNA binding; GO:0005488 binding; GO:0005515 protein binding; GO:0036002 pre-mRNA binding; GO:0097159 organic cyclic compound binding; GO:1901363 heterocyclic compound binding;	PF00076	PF00076 RNA recognition motif. (a.k.a. RRM, RBD, or RNP domain)	A	KOG0106	Alternative splicing factor SRp55/B52/SRp75 (RRM superfamily)
F1MY26	Phosphomevalonate kinase OS=Bos taurus OX=9913 GN=PMVK PE=4 SV=1	PMVK	0.627066	Down	21.9027	28214.8	17692.5	1.22921	0.770793	extracellular	K13273	PMVK; phosphomevalonate kinase [EC:2.7.4.2]	map00900 Terpenoid backbone biosynthesis; map01100 Metabolic pathways; map04146 Peroxisome	GO:0006066 alcohol metabolic process; GO:0006084 acetyl-CoA metabolic process; GO:0006139 nucleobase-containing compound metabolic process; GO:0006163 purine nucleotide metabolic process; GO:0006629 lipid metabolic process; GO:0006637 acyl-CoA metabolic process; GO:0006644 phospholipid metabolic process; GO:0006694 steroid biosynthetic process; GO:0006695 cholesterol biosynthetic process; GO:0006…	GO:0005622 intracellular anatomical structure; GO:0005737 cytoplasm; GO:0005777 peroxisome; GO:0005829 cytosol; GO:0042579 microbody; GO:0043226 organelle; GO:0043227 membrane-bounded organelle; GO:0043229 intracellular organelle; GO:0043231 intracellular membrane-bounded organelle;	GO:0000166 nucleotide binding; GO:0003824 catalytic activity; GO:0004631 phosphomevalonate kinase activity; GO:0005488 binding; GO:0005524 ATP binding; GO:0016301 kinase activity; GO:0016740 transferase activity; GO:0016772 transferase activity, transferring phosphorus-containing groups; GO:0016776 phosphotransferase activity, phosphate group as acceptor; GO:0017076 purine nucleotide binding; GO:…
F1MY37	Zinc transporter ZIP9 OS=Bos taurus OX=9913 GN=SLC39A9 PE=3 SV=3	SLC39A9	0.569908	Down	32.8472	6613.49	3769.08	1.27396	0.72604	plasma membrane	K14715	SLC39A9, ZIP9; solute carrier family 39 (zinc transporter), member 9		GO:0000041 transition metal ion transport; GO:0006810 transport; GO:0006811 ion transport; GO:0006812 cation transport; GO:0006829 zinc ion transport; GO:0030001 metal ion transport; GO:0034220 ion transmembrane transport; GO:0051179 localization; GO:0051234 establishment of localization; GO:0055085 transmembrane transport; GO:0071577 zinc ion transmembrane transport; GO:0098655 cation transmembr…		GO:0005215 transporter activity; GO:0005385 zinc ion transmembrane transporter activity; GO:0008324 cation transmembrane transporter activity; GO:0015075 ion transmembrane transporter activity; GO:0015318 inorganic molecular entity transmembrane transporter activity; GO:0022857 transmembrane transporter activity; GO:0022890 inorganic cation transmembrane transporter activity; GO:0046873 metal ion…			U	KOG3907	ZIP-like zinc transporter proteins
F1MZ46	Acidic leucine-rich nuclear phosphoprotein 32 family member B OS=Bos taurus OX=9913 GN=ANP32B PE=3 SV=3	ANP32B	1.6771	Up	30.7496	58619.8	98311.4	0.747076	1.25292	mitochondria	K18647	ANP32B; acidic leucine-rich nuclear phosphoprotein 32 family member B		GO:0000082 G1/S transition of mitotic cell cycle; GO:0000278 mitotic cell cycle; GO:0001944 vasculature development; GO:0006323 DNA packaging; GO:0006325 chromatin organization; GO:0006333 chromatin assembly or disassembly; GO:0006334 nucleosome assembly; GO:0006338 chromatin remodeling; GO:0006810 transport; GO:0006913 nucleocytoplasmic transport; GO:0006919 activation of cysteine-type endopepti…	GO:0005622 intracellular anatomical structure; GO:0005634 nucleus; GO:0005737 cytoplasm; GO:0005783 endoplasmic reticulum; GO:0005856 cytoskeleton; GO:0005875 microtubule associated complex; GO:0012505 endomembrane system; GO:0015630 microtubule cytoskeleton; GO:0032991 protein-containing complex; GO:0043226 organelle; GO:0043227 membrane-bounded organelle; GO:0043228 non-membrane-bounded organel…	GO:0005488 binding; GO:0005515 protein binding; GO:0008017 microtubule binding; GO:0008092 cytoskeletal protein binding; GO:0015631 tubulin binding; GO:0019899 enzyme binding; GO:0042393 histone binding; GO:0070063 RNA polymerase binding;			DR	KOG2739	Leucine-rich acidic nuclear protein
F1N0I3	Coagulation factor V OS=Bos taurus OX=9913 GN=F5 PE=3 SV=3	F5	0.566793	Down	239.546	47709.1	27041.2	1.27649	0.723507	endoplasmic reticulum	K03902	F5; coagulation factor V (labile factor)	map04610 Complement and coagulation cascades	GO:0002576 platelet degranulation; GO:0003008 system process; GO:0003013 circulatory system process; GO:0006464 cellular protein modification process; GO:0006807 nitrogen compound metabolic process; GO:0006810 transport; GO:0006887 exocytosis; GO:0006888 endoplasmic reticulum to Golgi vesicle-mediated transport; GO:0006900 vesicle budding from membrane; GO:0006901 vesicle coating; GO:0006903 vesi…	GO:0005576 extracellular region; GO:0005615 extracellular space; GO:0005622 intracellular anatomical structure; GO:0005737 cytoplasm; GO:0005783 endoplasmic reticulum; GO:0005788 endoplasmic reticulum lumen; GO:0005793 endoplasmic reticulum-Golgi intermediate compartment; GO:0005794 Golgi apparatus; GO:0005798 Golgi-associated vesicle; GO:0005886 plasma membrane; GO:0012505 endomembrane system; G…		PF07732; PF00754	PF07732 Multicopper oxidase; PF00754 F5/8 type C domain
F1N1W3	Thrombospondin-2 OS=Bos taurus OX=9913 GN=THBS2 PE=3 SV=2	THBS2	2.12891	Up	129.774	15657	33332.3	0.639201	1.3608	extracellular	K04659	THBS2S; thrombospondin 2/3/4/5	map04145 Phagosome; map04151 PI3K-Akt signaling pathway; map04510 Focal adhesion; map04512 ECM-receptor interaction	GO:0006950 response to stress; GO:0007610 behavior; GO:0009987 cellular process; GO:0016525 negative regulation of angiogenesis; GO:0022603 regulation of anatomical structure morphogenesis; GO:0032501 multicellular organismal process; GO:0033554 cellular response to stress; GO:0033555 multicellular organismal response to stress; GO:0034103 regulation of tissue remodeling; GO:0034976 response to e…	GO:0005576 extracellular region; GO:0005604 basement membrane; GO:0005615 extracellular space; GO:0005622 intracellular anatomical structure; GO:0005737 cytoplasm; GO:0005783 endoplasmic reticulum; GO:0012505 endomembrane system; GO:0016528 sarcoplasm; GO:0016529 sarcoplasmic reticulum; GO:0030141 secretory granule; GO:0031012 extracellular matrix; GO:0031091 platelet alpha granule; GO:0031410 cy…	GO:0005488 binding; GO:0005539 glycosaminoglycan binding; GO:0008201 heparin binding; GO:0043167 ion binding; GO:0043168 anion binding; GO:0097367 carbohydrate derivative binding; GO:1901681 sulfur compound binding;	PF00093; PF00090; PF07645; PF12947; PF02412	PF00093 von Willebrand factor type C domain; PF00090 Thrombospondin type 1 domain; PF07645 Calcium-binding EGF domain; PF12947 EGF domain; PF02412 Thrombospondin type 3 repeat
F1N322	Nischarin OS=Bos taurus OX=9913 GN=NISCH PE=4 SV=3	NISCH	1.71002	Up	166.941	2917.58	4989.13	0.738002	1.262	plasma membrane	K24095	NISCH; nischarin		GO:0003008 system process; GO:0003013 circulatory system process; GO:0005975 carbohydrate metabolic process; GO:0005996 monosaccharide metabolic process; GO:0006006 glucose metabolic process; GO:0006810 transport; GO:0006996 organelle organization; GO:0007010 cytoskeleton organization; GO:0007154 cell communication; GO:0007165 signal transduction; GO:0007264 small GTPase mediated signal transduct…	GO:0005622 intracellular anatomical structure; GO:0005737 cytoplasm; GO:0005768 endosome; GO:0005769 early endosome; GO:0005829 cytosol; GO:0005886 plasma membrane; GO:0012505 endomembrane system; GO:0016020 membrane; GO:0031410 cytoplasmic vesicle; GO:0031982 vesicle; GO:0043226 organelle; GO:0043227 membrane-bounded organelle; GO:0043229 intracellular organelle; GO:0055037 recycling endosome; G…	GO:0005102 signaling receptor binding; GO:0005178 integrin binding; GO:0005488 binding; GO:0005515 protein binding; GO:0042802 identical protein binding; GO:0044877 protein-containing complex binding; GO:0050839 cell adhesion molecule binding;	PF00787	PF00787 PX domain	R	KOG1859	Leucine-rich repeat proteins
F1N3F2	Interferon regulatory factor 2 binding protein like OS=Bos taurus OX=9913 GN=IRF2BPL PE=3 SV=2	IRF2BPL	1.57644	Up	80.3755	8027.25	12654.5	0.776263	1.22374	mitochondria	K22383	IRF2BP; interferon regulatory factor 2-binding protein		GO:0000003 reproduction; GO:0000122 negative regulation of transcription by RNA polymerase II; GO:0003006 developmental process involved in reproduction; GO:0006355 regulation of transcription, DNA-templated; GO:0006357 regulation of transcription by RNA polymerase II; GO:0009889 regulation of biosynthetic process; GO:0009890 negative regulation of biosynthetic process; GO:0009891 positive regula…	GO:0005622 intracellular anatomical structure; GO:0005634 nucleus; GO:0005654 nucleoplasm; GO:0031974 membrane-enclosed lumen; GO:0031981 nuclear lumen; GO:0034399 nuclear periphery; GO:0043226 organelle; GO:0043227 membrane-bounded organelle; GO:0043229 intracellular organelle; GO:0043231 intracellular membrane-bounded organelle; GO:0043233 organelle lumen; GO:0070013 intracellular organelle lum…	GO:0005488 binding; GO:0005515 protein binding;	PF11261	PF11261 Interferon regulatory factor 2-binding protein zinc finger	O	KOG3579	Predicted E3 ubiquitin ligase
F1N3P8	protein disulfide-isomerase OS=Bos taurus OX=9913 GN=CRELD1 PE=3 SV=2	CRELD1	0.373508	Down	50.7445	26564.9	9922.19	1.45613	0.543874	plasma membrane	K24335	CRELD; protein disulfide-isomerase [EC:5.3.4.1]		GO:0003197 endocardial cushion development; GO:0003205 cardiac chamber development; GO:0003279 cardiac septum development; GO:0007275 multicellular organism development; GO:0007507 heart development; GO:0009888 tissue development; GO:0032501 multicellular organismal process; GO:0032502 developmental process; GO:0048513 animal organ development; GO:0048731 system development; GO:0048856 anatomical…			PF07645	PF07645 Calcium-binding EGF domain	S	KOG4260	Uncharacterized conserved protein
F1N429	SEC14 and spectrin domain containing 1 OS=Bos taurus OX=9913 GN=SESTD1 PE=4 SV=3	SESTD1	0.57232	Down	79.3503	7862.61	4499.93	1.27201	0.727994	cytoplasm				GO:0001568 blood vessel development; GO:0001944 vasculature development; GO:0007275 multicellular organism development; GO:0009653 anatomical structure morphogenesis; GO:0010959 regulation of metal ion transport; GO:0032501 multicellular organismal process; GO:0032502 developmental process; GO:0032879 regulation of localization; GO:0034762 regulation of transmembrane transport; GO:0034763 negativ…	GO:0005622 intracellular anatomical structure; GO:0005856 cytoskeleton; GO:0043226 organelle; GO:0043228 non-membrane-bounded organelle; GO:0043229 intracellular organelle; GO:0043232 intracellular non-membrane-bounded organelle; GO:0045111 intermediate filament cytoskeleton;	GO:0005488 binding; GO:0005543 phospholipid binding; GO:0005546 phosphatidylinositol-4,5-bisphosphate binding; GO:0008289 lipid binding; GO:0010314 phosphatidylinositol-5-phosphate binding; GO:0032266 phosphatidylinositol-3-phosphate binding; GO:0035091 phosphatidylinositol binding; GO:0043167 ion binding; GO:0043168 anion binding; GO:0043325 phosphatidylinositol-3,4-bisphosphate binding; GO:0070…	PF13716	PF13716 Divergent CRAL/TRIO domain	T	KOG4240	Multidomain protein, contains SPEC repeats, PH, SH3, and separate rac-specific and rho-specific guanine nucleotide exchange factor domains
F6PXE3	Caveolae associated protein 2 OS=Bos taurus OX=9913 GN=CAVIN2 PE=1 SV=1	CAVIN2	0.539112	Down	45.236	37300.5	20109.2	1.29945	0.70055	cytoplasm				GO:0006355 regulation of transcription, DNA-templated; GO:0006357 regulation of transcription by RNA polymerase II; GO:0007009 plasma membrane organization; GO:0009889 regulation of biosynthetic process; GO:0009891 positive regulation of biosynthetic process; GO:0009893 positive regulation of metabolic process; GO:0009987 cellular process; GO:0010256 endomembrane system organization; GO:0010468 r…	GO:0005622 intracellular anatomical structure; GO:0005634 nucleus; GO:0005654 nucleoplasm; GO:0005737 cytoplasm; GO:0005829 cytosol; GO:0005856 cytoskeleton; GO:0005886 plasma membrane; GO:0005901 caveola; GO:0015629 actin cytoskeleton; GO:0016020 membrane; GO:0031974 membrane-enclosed lumen; GO:0031981 nuclear lumen; GO:0043226 organelle; GO:0043227 membrane-bounded organelle; GO:0043228 non-mem…	GO:0001786 phosphatidylserine binding; GO:0005080 protein kinase C binding; GO:0005488 binding; GO:0005515 protein binding; GO:0005543 phospholipid binding; GO:0008289 lipid binding; GO:0019899 enzyme binding; GO:0019900 kinase binding; GO:0019901 protein kinase binding; GO:0043167 ion binding; GO:0043168 anion binding; GO:0072341 modified amino acid binding;
F6QD94	Cytochrome c oxidase copper chaperone COX17 OS=Bos taurus OX=9913 GN=COX17 PE=3 SV=2	COX17	1.66086	Up	9.67344	11447	19011.9	0.751637	1.24836	extracellular	K02260	COX17; cytochrome c oxidase assembly protein subunit 17	map00190 Oxidative phosphorylation; map01100 Metabolic pathways; map04714 Thermogenesis	GO:0000041 transition metal ion transport; GO:0006091 generation of precursor metabolites and energy; GO:0006810 transport; GO:0006811 ion transport; GO:0006812 cation transport; GO:0006825 copper ion transport; GO:0006996 organelle organization; GO:0007005 mitochondrion organization; GO:0008152 metabolic process; GO:0008284 positive regulation of cell population proliferation; GO:0008535 respira…	GO:0005622 intracellular anatomical structure; GO:0005737 cytoplasm; GO:0005739 mitochondrion; GO:0005740 mitochondrial envelope; GO:0005758 mitochondrial intermembrane space; GO:0031967 organelle envelope; GO:0031970 organelle envelope lumen; GO:0031974 membrane-enclosed lumen; GO:0031975 envelope; GO:0043226 organelle; GO:0043227 membrane-bounded organelle; GO:0043229 intracellular organelle; G…	GO:0005488 binding; GO:0005507 copper ion binding; GO:0008047 enzyme activator activity; GO:0016530 metallochaperone activity; GO:0016531 copper chaperone activity; GO:0030234 enzyme regulator activity; GO:0043167 ion binding; GO:0043169 cation binding; GO:0046872 metal ion binding; GO:0046914 transition metal ion binding; GO:0098772 molecular function regulator; GO:0140104 molecular carrier acti…			O	KOG3496	Cytochrome c oxidase assembly protein/Cu2+ chaperone COX17
F6QE33	COP9 signalosome subunit 7A OS=Bos taurus OX=9913 GN=COPS7A PE=3 SV=1	COPS7A	0.649033	Down	30.2996	27063.2	17564.9	1.21283	0.787168	cytoplasm	K12180	COPS7, CSN7; COP9 signalosome complex subunit 7		GO:0000003 reproduction; GO:0000338 protein deneddylation; GO:0000715 nucleotide-excision repair, DNA damage recognition; GO:0002009 morphogenesis of an epithelium; GO:0003006 developmental process involved in reproduction; GO:0006139 nucleobase-containing compound metabolic process; GO:0006259 DNA metabolic process; GO:0006281 DNA repair; GO:0006283 transcription-coupled nucleotide-excision repa…	GO:0005622 intracellular anatomical structure; GO:0005634 nucleus; GO:0005654 nucleoplasm; GO:0005737 cytoplasm; GO:0005829 cytosol; GO:0008180 COP9 signalosome; GO:0031974 membrane-enclosed lumen; GO:0031981 nuclear lumen; GO:0032991 protein-containing complex; GO:0034399 nuclear periphery; GO:0043226 organelle; GO:0043227 membrane-bounded organelle; GO:0043229 intracellular organelle; GO:004323…	GO:0005488 binding; GO:0005515 protein binding;	PF01399; PF18392	PF01399 PCI domain; PF18392 COP9 signalosome complex subunit 7a helix I domain	OT	KOG3250	COP9 signalosome, subunit CSN7
F6R223	riboflavin kinase OS=Bos taurus OX=9913 GN=RFK PE=4 SV=1	RFK	0.483101	Down	17.6493	20122.1	9720.99	1.34853	0.651474	mitochondria	K00861	RFK, FMN1; riboflavin kinase [EC:2.7.1.26]	map00740 Riboflavin metabolism; map01100 Metabolic pathways; map01240 Biosynthesis of cofactors	GO:0006139 nucleobase-containing compound metabolic process; GO:0006725 cellular aromatic compound metabolic process; GO:0006753 nucleoside phosphate metabolic process; GO:0006793 phosphorus metabolic process; GO:0006796 phosphate-containing compound metabolic process; GO:0006807 nitrogen compound metabolic process; GO:0008152 metabolic process; GO:0009058 biosynthetic process; GO:0009117 nucleot…		GO:0003824 catalytic activity; GO:0008531 riboflavin kinase activity; GO:0016301 kinase activity; GO:0016740 transferase activity; GO:0016772 transferase activity, transferring phosphorus-containing groups; GO:0016773 phosphotransferase activity, alcohol group as acceptor;	PF01687	PF01687 Riboflavin kinase	H	KOG3110	Riboflavin kinase
F6RWI0	Non-homologous end joining factor 1 OS=Bos taurus OX=9913 GN=NHEJ1 PE=3 SV=1	NHEJ1	3.06464	Up	33.6125	24893.9	76291.1	0.492048	1.50795	nucleus	K10980	NHEJ1, XLF; non-homologous end-joining factor 1	map03450 Non-homologous end-joining
G3MY77	Magnesium transporter protein 1 OS=Bos taurus OX=9913 GN=MAGT1 PE=3 SV=2	MAGT1	0.608978	Down	38.0337	43923.7	26748.5	1.24303	0.756975	plasma membrane	K19478	MAGT1; magnesium transporter 1		GO:0001775 cell activation; GO:0002252 immune effector process; GO:0002263 cell activation involved in immune response; GO:0002274 myeloid leukocyte activation; GO:0002275 myeloid cell activation involved in immune response; GO:0002283 neutrophil activation involved in immune response; GO:0002366 leukocyte activation involved in immune response; GO:0002376 immune system process; GO:0002443 leukoc…	GO:0000323 lytic vacuole; GO:0005622 intracellular anatomical structure; GO:0005737 cytoplasm; GO:0005764 lysosome; GO:0005765 lysosomal membrane; GO:0005766 primary lysosome; GO:0005773 vacuole; GO:0005774 vacuolar membrane; GO:0005783 endoplasmic reticulum; GO:0005789 endoplasmic reticulum membrane; GO:0005886 plasma membrane; GO:0005887 integral component of plasma membrane; GO:0008250 oligosa…	GO:0005215 transporter activity; GO:0008324 cation transmembrane transporter activity; GO:0015075 ion transmembrane transporter activity; GO:0015095 magnesium ion transmembrane transporter activity; GO:0015318 inorganic molecular entity transmembrane transporter activity; GO:0022857 transmembrane transporter activity; GO:0022890 inorganic cation transmembrane transporter activity; GO:0046873 meta…			O	KOG2603	Oligosaccharyltransferase, gamma subunit
G3MZC5	AP-5 complex subunit beta-1 OS=Bos taurus OX=9913 GN=AP5B1 PE=2 SV=1	AP5B1	2.49736	Up	93.9924	12886.1	32181.2	0.57186	1.42814	mitochondria	K19022	AP5B1; AP-5 complex subunit beta-1		GO:0006810 transport; GO:0016192 vesicle-mediated transport; GO:0016197 endosomal transport; GO:0046907 intracellular transport; GO:0051179 localization; GO:0051234 establishment of localization; GO:0051641 cellular localization; GO:0051649 establishment of localization in cell;	GO:0005622 intracellular anatomical structure; GO:0005737 cytoplasm; GO:0016020 membrane; GO:0030117 membrane coat; GO:0030119 AP-type membrane coat adaptor complex; GO:0032991 protein-containing complex; GO:0048475 coated membrane; GO:0098796 membrane protein complex;
G3X7G8	RNA helicase OS=Bos taurus OX=9913 GN=DDX59 PE=3 SV=1	DDX59	0.48308	Down	67.4385	6103.4	2948.44	1.34854	0.651456	nucleus	K19466	DDX59; ATP-dependent RNA helicase DDX59 [EC:3.6.4.13]		GO:0006139 nucleobase-containing compound metabolic process; GO:0006725 cellular aromatic compound metabolic process; GO:0006807 nitrogen compound metabolic process; GO:0008152 metabolic process; GO:0009987 cellular process; GO:0010501 RNA secondary structure unwinding; GO:0016070 RNA metabolic process; GO:0034641 cellular nitrogen compound metabolic process; GO:0043170 macromolecule metabolic pr…	GO:0005622 intracellular anatomical structure; GO:0005634 nucleus; GO:0005730 nucleolus; GO:0005737 cytoplasm; GO:0031974 membrane-enclosed lumen; GO:0031981 nuclear lumen; GO:0043226 organelle; GO:0043227 membrane-bounded organelle; GO:0043228 non-membrane-bounded organelle; GO:0043229 intracellular organelle; GO:0043231 intracellular membrane-bounded organelle; GO:0043232 intracellular non-memb…	GO:0003724 RNA helicase activity; GO:0003824 catalytic activity; GO:0004386 helicase activity; GO:0008186 ATP-dependent activity, acting on RNA; GO:0016462 pyrophosphatase activity; GO:0016787 hydrolase activity; GO:0016817 hydrolase activity, acting on acid anhydrides; GO:0016818 hydrolase activity, acting on acid anhydrides, in phosphorus-containing anhydrides; GO:0016887 ATP hydrolysis activit…	PF04438; PF00270; PF00271	PF04438 HIT zinc finger; PF00270 DEAD/DEAH box helicase; PF00271 Helicase conserved C-terminal domain	A	KOG0331	ATP-dependent RNA helicase
G5E526	Protein tyrosine phosphatase 4A1 OS=Bos taurus OX=9913 GN=PTP4A1 PE=4 SV=1	PTP4A1	0.495853	Down	19.802	14213.6	7047.84	1.33703	0.66297	mitochondria	K18041	PTP4A; protein tyrosine phosphatase type IVA [EC:3.1.3.48]		GO:0006464 cellular protein modification process; GO:0006470 protein dephosphorylation; GO:0006793 phosphorus metabolic process; GO:0006796 phosphate-containing compound metabolic process; GO:0006807 nitrogen compound metabolic process; GO:0008152 metabolic process; GO:0009987 cellular process; GO:0016311 dephosphorylation; GO:0019538 protein metabolic process; GO:0030334 regulation of cell migra…	GO:0005622 intracellular anatomical structure; GO:0005634 nucleus; GO:0005737 cytoplasm; GO:0005768 endosome; GO:0005769 early endosome; GO:0005783 endoplasmic reticulum; GO:0005819 spindle; GO:0005856 cytoskeleton; GO:0005886 plasma membrane; GO:0009898 cytoplasmic side of plasma membrane; GO:0012505 endomembrane system; GO:0015630 microtubule cytoskeleton; GO:0016020 membrane; GO:0031410 cytopl…	GO:0003824 catalytic activity; GO:0004721 phosphoprotein phosphatase activity; GO:0004725 protein tyrosine phosphatase activity; GO:0004727 prenylated protein tyrosine phosphatase activity; GO:0008138 protein tyrosine/serine/threonine phosphatase activity; GO:0016787 hydrolase activity; GO:0016788 hydrolase activity, acting on ester bonds; GO:0016791 phosphatase activity; GO:0042578 phosphoric es…	PF00102	PF00102 Protein-tyrosine phosphatase	T	KOG2836	Protein tyrosine phosphatase IVA1
G5E5S5	Neuron navigator 1 OS=Bos taurus OX=9913 GN=NAV1 PE=3 SV=2	NAV1	2.64876	Up	159.237	3476.03	9207.18	0.548131	1.45187	nucleus	K16776	NAV1; neuron navigator 1
Q08DX7	Protein spinster homolog 1 OS=Bos taurus OX=9913 GN=SPNS1 PE=2 SV=1	SPNS1	0.606205	Down	56.5195	79589.5	48247.6	1.24517	0.754829	plasma membrane	K23677	SPNS; MFS transporter, Spinster family, sphingosine-1-phosphate transporter		GO:0000003 reproduction; GO:0002165 instar larval or pupal development; GO:0003006 developmental process involved in reproduction; GO:0003376 sphingosine-1-phosphate receptor signaling pathway; GO:0006810 transport; GO:0006869 lipid transport; GO:0006897 endocytosis; GO:0006914 autophagy; GO:0006915 apoptotic process; GO:0006928 movement of cell or subcellular component; GO:0006950 response to st…	GO:0000323 lytic vacuole; GO:0005622 intracellular anatomical structure; GO:0005737 cytoplasm; GO:0005764 lysosome; GO:0005765 lysosomal membrane; GO:0005768 endosome; GO:0005770 late endosome; GO:0005773 vacuole; GO:0005774 vacuolar membrane; GO:0010008 endosome membrane; GO:0012505 endomembrane system; GO:0016020 membrane; GO:0031090 organelle membrane; GO:0031410 cytoplasmic vesicle; GO:003190…	GO:0005215 transporter activity; GO:0005319 lipid transporter activity; GO:0046624 sphingolipid transporter activity;			G	KOG1330	Sugar transporter/spinster transmembrane protein
Q0IIH0	WD repeat domain phosphoinositide-interacting protein 4 OS=Bos taurus OX=9913 GN=WDR45 PE=2 SV=1	WDR45	1.72241	Up	39.8235	30067.5	51788.6	0.734643	1.26536	mitochondria	K22991	WDR45, WIPI4, WIPI3; WD repeat-containing protein 45		GO:0000045 autophagosome assembly; GO:0000422 autophagy of mitochondrion; GO:0006464 cellular protein modification process; GO:0006497 protein lipidation; GO:0006807 nitrogen compound metabolic process; GO:0006914 autophagy; GO:0006996 organelle organization; GO:0007005 mitochondrion organization; GO:0007033 vacuole organization; GO:0008104 protein localization; GO:0008152 metabolic process; GO:0…	GO:0000407 phagophore assembly site; GO:0005622 intracellular anatomical structure; GO:0005737 cytoplasm; GO:0005829 cytosol; GO:0016020 membrane; GO:0019898 extrinsic component of membrane; GO:0034045 phagophore assembly site membrane;	GO:0005488 binding; GO:0005515 protein binding; GO:0005543 phospholipid binding; GO:0008289 lipid binding; GO:0010314 phosphatidylinositol-5-phosphate binding; GO:0032266 phosphatidylinositol-3-phosphate binding; GO:0035091 phosphatidylinositol binding; GO:0043167 ion binding; GO:0043168 anion binding; GO:0070273 phosphatidylinositol-4-phosphate binding; GO:0080025 phosphatidylinositol-3,5-bispho…			S	KOG2111	Uncharacterized conserved protein, contains WD40 repeats
Q0VCF3	Suppressor of IKBKE 1 OS=Bos taurus OX=9913 GN=SIKE1 PE=2 SV=1	SIKE1	0.224032	Down	23.6749	7066.54	1583.13	1.63394	0.366055	cytoplasm,nucleus	K12656	SIKE; suppressor of IKK-epsilon	map04622 RIG-I-like receptor signaling pathway		GO:0005622 intracellular anatomical structure; GO:0005737 cytoplasm; GO:0005829 cytosol;	GO:0005488 binding; GO:0005515 protein binding; GO:0019899 enzyme binding; GO:0019900 kinase binding; GO:0019901 protein kinase binding; GO:0031267 small GTPase binding; GO:0051020 GTPase binding;
Q17QL4	MAGE family member D2 OS=Bos taurus OX=9913 GN=MAGED2 PE=2 SV=1	MAGED2	1.58412	Up	63.2066	38113.3	60376	0.773957	1.22604	nucleus	K24127	MAGE; melanoma-associated antigen		GO:0000003 reproduction; GO:0002576 platelet degranulation; GO:0003008 system process; GO:0003014 renal system process; GO:0003096 renal sodium ion transport; GO:0006139 nucleobase-containing compound metabolic process; GO:0006259 DNA metabolic process; GO:0006281 DNA repair; GO:0006725 cellular aromatic compound metabolic process; GO:0006807 nitrogen compound metabolic process; GO:0006810 transp…	GO:0000793 condensed chromosome; GO:0005576 extracellular region; GO:0005622 intracellular anatomical structure; GO:0005634 nucleus; GO:0005694 chromosome; GO:0005730 nucleolus; GO:0005737 cytoplasm; GO:0005829 cytosol; GO:0012505 endomembrane system; GO:0030141 secretory granule; GO:0030915 Smc5-Smc6 complex; GO:0031091 platelet alpha granule; GO:0031093 platelet alpha granule lumen; GO:0031410 …				S	KOG4562	Uncharacterized conserved protein (tumor-rejection antigen MAGE in humans)
Q1LZ79	Gem-associated protein 8 OS=Bos taurus OX=9913 GN=GEMIN8 PE=2 SV=1	GEMIN8	0.615095	Down	26.7438	19266.7	11850.8	1.23832	0.761683	cytoplasm	K13136	GEMIN8; gem associated protein 8		GO:0000375 RNA splicing, via transesterification reactions; GO:0000377 RNA splicing, via transesterification reactions with bulged adenosine as nucleophile; GO:0000387 spliceosomal snRNP assembly; GO:0000398 mRNA splicing, via spliceosome; GO:0006139 nucleobase-containing compound metabolic process; GO:0006396 RNA processing; GO:0006397 mRNA processing; GO:0006725 cellular aromatic compound metab…	GO:0005622 intracellular anatomical structure; GO:0005634 nucleus; GO:0005654 nucleoplasm; GO:0005737 cytoplasm; GO:0005829 cytosol; GO:0031974 membrane-enclosed lumen; GO:0031981 nuclear lumen; GO:0032797 SMN complex; GO:0032991 protein-containing complex; GO:0034719 SMN-Sm protein complex; GO:0043226 organelle; GO:0043227 membrane-bounded organelle; GO:0043229 intracellular organelle; GO:004323…
Q2HJD4	CSTF2 protein OS=Bos taurus OX=9913 GN=CSTF2T PE=2 SV=1	CSTF2T	0.586993	Down	66.1666	11355.9	6665.85	1.26025	0.739755	nucleus	K14407	CSTF2, RNA15; cleavage stimulation factor subunit 2	map03015 mRNA surveillance pathway	GO:0000375 RNA splicing, via transesterification reactions; GO:0000377 RNA splicing, via transesterification reactions with bulged adenosine as nucleophile; GO:0000398 mRNA splicing, via spliceosome; GO:0006139 nucleobase-containing compound metabolic process; GO:0006351 transcription, DNA-templated; GO:0006353 DNA-templated transcription, termination; GO:0006366 transcription by RNA polymerase I…	GO:0005622 intracellular anatomical structure; GO:0005634 nucleus; GO:0005654 nucleoplasm; GO:0005847 mRNA cleavage and polyadenylation specificity factor complex; GO:0005848 mRNA cleavage stimulating factor complex; GO:0005849 mRNA cleavage factor complex; GO:0016604 nuclear body; GO:0016607 nuclear speck; GO:0031974 membrane-enclosed lumen; GO:0031981 nuclear lumen; GO:0032991 protein-containin…	GO:0003676 nucleic acid binding; GO:0003723 RNA binding; GO:0003729 mRNA binding; GO:0005488 binding; GO:0097159 organic cyclic compound binding; GO:1901363 heterocyclic compound binding;	PF00076; PF14304	PF00076 RNA recognition motif. (a.k.a. RRM, RBD, or RNP domain); PF14304 Transcription termination and cleavage factor C-terminal	A	KOG0108	mRNA cleavage and polyadenylation factor I complex, subunit RNA15
Q2KI08	Mitochondrial import receptor subunit TOM7 homolog OS=Bos taurus OX=9913 GN=TOMM7 PE=3 SV=1	TOMM7	0.649609	Down	6.21846	14219.9	9237.36	1.21241	0.787591	cytoplasm	K17771	TOM7; mitochondrial import receptor subunit TOM7	map04137 Mitophagy - animal	GO:0006605 protein targeting; GO:0006626 protein targeting to mitochondrion; GO:0006810 transport; GO:0006839 mitochondrial transport; GO:0006886 intracellular protein transport; GO:0006950 response to stress; GO:0006996 organelle organization; GO:0007005 mitochondrion organization; GO:0007006 mitochondrial membrane organization; GO:0008104 protein localization; GO:0009893 positive regulation of …	GO:0005622 intracellular anatomical structure; GO:0005737 cytoplasm; GO:0005739 mitochondrion; GO:0005740 mitochondrial envelope; GO:0005741 mitochondrial outer membrane; GO:0005742 mitochondrial outer membrane translocase complex; GO:0016020 membrane; GO:0016021 integral component of membrane; GO:0019867 outer membrane; GO:0031090 organelle membrane; GO:0031224 intrinsic component of membrane; G…	GO:0005215 transporter activity; GO:0008320 protein transmembrane transporter activity; GO:0022857 transmembrane transporter activity; GO:0022884 macromolecule transmembrane transporter activity; GO:0042887 amide transmembrane transporter activity; GO:1904680 peptide transmembrane transporter activity;			U	KOG4449	Translocase of outer mitochondrial membrane complex, subunit TOM7
Q2NKT5	Protein transport protein Sec61 subunit beta OS=Bos taurus OX=9913 GN=SEC61B PE=1 SV=1	SEC61B	1.55364	Up	9.94442	198894	309009	0.783196	1.2168	mitochondria	K09481	SEC61B, SBH2; protein transport protein SEC61 subunit beta	map03060 Protein export; map04141 Protein processing in endoplasmic reticulum; map04145 Phagosome	GO:0006508 proteolysis; GO:0006511 ubiquitin-dependent protein catabolic process; GO:0006605 protein targeting; GO:0006606 protein import into nucleus; GO:0006612 protein targeting to membrane; GO:0006613 cotranslational protein targeting to membrane; GO:0006614 SRP-dependent cotranslational protein targeting to membrane; GO:0006616 SRP-dependent cotranslational protein targeting to membrane, tra…	GO:0005622 intracellular anatomical structure; GO:0005737 cytoplasm; GO:0005783 endoplasmic reticulum; GO:0005789 endoplasmic reticulum membrane; GO:0005791 rough endoplasmic reticulum; GO:0005829 cytosol; GO:0012505 endomembrane system; GO:0016020 membrane; GO:0016021 integral component of membrane; GO:0030867 rough endoplasmic reticulum membrane; GO:0031090 organelle membrane; GO:0031205 endopl…	GO:0005085 guanyl-nucleotide exchange factor activity; GO:0005215 transporter activity; GO:0005488 binding; GO:0005515 protein binding; GO:0008320 protein transmembrane transporter activity; GO:0015399 primary active transmembrane transporter activity; GO:0015450 protein-transporting ATPase activity; GO:0019838 growth factor binding; GO:0019899 enzyme binding; GO:0022804 active transmembrane tran…			O	KOG3457	Sec61 protein translocation complex, beta subunit
Q2NKU4	Calcium regulated heat stable protein 1 OS=Bos taurus OX=9913 GN=CARHSP1 PE=1 SV=1	CARHSP1	0.40062	Down	15.891	34245.1	13719.3	1.42794	0.572061	nucleus				GO:0000902 cell morphogenesis; GO:0000904 cell morphogenesis involved in differentiation; GO:0007275 multicellular organism development; GO:0007399 nervous system development; GO:0009653 anatomical structure morphogenesis; GO:0009894 regulation of catabolic process; GO:0009987 cellular process; GO:0010468 regulation of gene expression; GO:0010608 posttranscriptional regulation of gene expression;…	GO:0005622 intracellular anatomical structure; GO:0005737 cytoplasm; GO:0005829 cytosol; GO:0032991 protein-containing complex; GO:0035770 ribonucleoprotein granule; GO:0036464 cytoplasmic ribonucleoprotein granule; GO:0043186 P granule; GO:0043226 organelle; GO:0043228 non-membrane-bounded organelle; GO:0043229 intracellular organelle; GO:0043232 intracellular non-membrane-bounded organelle; GO:…	GO:0003676 nucleic acid binding; GO:0003723 RNA binding; GO:0003729 mRNA binding; GO:0003730 mRNA 3'-UTR binding; GO:0005488 binding; GO:0097159 organic cyclic compound binding; GO:1901363 heterocyclic compound binding;	PF00313	PF00313 'Cold-shock' DNA-binding domain	J	KOG3070	Predicted RNA-binding protein containing PIN domain and invovled in translation or RNA processing
Q3MHZ1	Probable N-acetyltransferase 14 OS=Bos taurus OX=9913 PE=2 SV=1	--	1.70803	Up	21.7335	10706.3	18286.6	0.738545	1.26145	plasma membrane				GO:0006139 nucleobase-containing compound metabolic process; GO:0006351 transcription, DNA-templated; GO:0006352 DNA-templated transcription, initiation; GO:0006355 regulation of transcription, DNA-templated; GO:0006725 cellular aromatic compound metabolic process; GO:0006807 nitrogen compound metabolic process; GO:0008152 metabolic process; GO:0009058 biosynthetic process; GO:0009059 macromolecu…	GO:0005622 intracellular anatomical structure; GO:0005634 nucleus; GO:0043226 organelle; GO:0043227 membrane-bounded organelle; GO:0043229 intracellular organelle; GO:0043231 intracellular membrane-bounded organelle;
Q3SZ07	Esterase OVCA2 OS=Bos taurus OX=9913 GN=OVCA2 PE=2 SV=1	OVCA2	1.66294	Up	24.1677	13809.8	22964.9	0.751049	1.24895	extracellular				GO:0001101 response to acid chemical; GO:0010033 response to organic substance; GO:0032526 response to retinoic acid; GO:0033993 response to lipid; GO:0042221 response to chemical; GO:0050896 response to stimulus; GO:1901700 response to oxygen-containing compound;	GO:0005622 intracellular anatomical structure; GO:0005634 nucleus; GO:0005737 cytoplasm; GO:0043226 organelle; GO:0043227 membrane-bounded organelle; GO:0043229 intracellular organelle; GO:0043231 intracellular membrane-bounded organelle;	GO:0003824 catalytic activity; GO:0016787 hydrolase activity;	PF03959	PF03959 Serine hydrolase (FSH1)	E	KOG2551	Phospholipase/carboxyhydrolase
Q3SZ93	Mitochondrial import inner membrane translocase subunit Tim8 B OS=Bos taurus OX=9913 GN=TIMM8B PE=3 SV=1	TIMM8B	0.663556	Down	9.37155	5264.4	3493.22	1.20224	0.797756	extracellular	K17780	TIM8; mitochondrial import inner membrane translocase subunit TIM8		GO:0006605 protein targeting; GO:0006626 protein targeting to mitochondrion; GO:0006810 transport; GO:0006811 ion transport; GO:0006812 cation transport; GO:0006839 mitochondrial transport; GO:0006886 intracellular protein transport; GO:0006996 organelle organization; GO:0007005 mitochondrion organization; GO:0008104 protein localization; GO:0009987 cellular process; GO:0015031 protein transport;…	GO:0005622 intracellular anatomical structure; GO:0005737 cytoplasm; GO:0005739 mitochondrion; GO:0005740 mitochondrial envelope; GO:0005743 mitochondrial inner membrane; GO:0005744 TIM23 mitochondrial import inner membrane translocase complex; GO:0016020 membrane; GO:0019866 organelle inner membrane; GO:0031090 organelle membrane; GO:0031966 mitochondrial membrane; GO:0031967 organelle envelope;…	GO:0005215 transporter activity; GO:0008320 protein transmembrane transporter activity; GO:0008324 cation transmembrane transporter activity; GO:0015075 ion transmembrane transporter activity; GO:0015318 inorganic molecular entity transmembrane transporter activity; GO:0015399 primary active transmembrane transporter activity; GO:0015450 protein-transporting ATPase activity; GO:0022804 active tra…	PF02953	PF02953 Tim10/DDP family zinc finger	U	KOG3489	Mitochondrial import inner membrane translocase, subunit TIM8
Q3SZP1	Solute carrier family 35 (CMP-sialic acid transporter), member A1 OS=Bos taurus OX=9913 GN=SLC35A1 PE=2 SV=1	SLC35A1	1.53423	Up	36.8156	18510.4	28399.1	0.789196	1.2108	plasma membrane	K15272	SLC35A1_2_3; solute carrier family 35 (UDP-sugar transporter), member A1/2/3		GO:0005975 carbohydrate metabolic process; GO:0006464 cellular protein modification process; GO:0006807 nitrogen compound metabolic process; GO:0006810 transport; GO:0006811 ion transport; GO:0006820 anion transport; GO:0008152 metabolic process; GO:0009987 cellular process; GO:0015711 organic anion transport; GO:0015780 nucleotide-sugar transmembrane transport; GO:0015782 CMP-N-acetylneuraminate…	GO:0000139 Golgi membrane; GO:0005622 intracellular anatomical structure; GO:0005737 cytoplasm; GO:0005794 Golgi apparatus; GO:0005795 Golgi stack; GO:0005797 Golgi medial cisterna; GO:0005886 plasma membrane; GO:0005887 integral component of plasma membrane; GO:0012505 endomembrane system; GO:0016020 membrane; GO:0016021 integral component of membrane; GO:0030141 secretory granule; GO:0031090 or…	GO:0005215 transporter activity; GO:0005338 nucleotide-sugar transmembrane transporter activity; GO:0005456 CMP-N-acetylneuraminate transmembrane transporter activity; GO:0008509 anion transmembrane transporter activity; GO:0008514 organic anion transmembrane transporter activity; GO:0015075 ion transmembrane transporter activity; GO:0015165 pyrimidine nucleotide-sugar transmembrane transporter a…			G	KOG2234	Predicted UDP-galactose transporter
Q3T0G3	AHA1, activator of heat shock 90kDa protein ATPase homolog 1 (Yeast) OS=Bos taurus OX=9913 GN=AHSA1 PE=2 SV=1	AHSA1	0.66228	Down	38.2413	48188.2	31914.1	1.20317	0.796833	cytoplasm				GO:0006457 protein folding; GO:0009987 cellular process; GO:0032781 positive regulation of ATP-dependent activity; GO:0043085 positive regulation of catalytic activity; GO:0043462 regulation of ATP-dependent activity; GO:0044093 positive regulation of molecular function; GO:0050790 regulation of catalytic activity; GO:0051336 regulation of hydrolase activity; GO:0051345 positive regulation of hyd…	GO:0005622 intracellular anatomical structure; GO:0005737 cytoplasm; GO:0005829 cytosol;	GO:0001671 ATPase activator activity; GO:0005488 binding; GO:0005515 protein binding; GO:0008047 enzyme activator activity; GO:0030234 enzyme regulator activity; GO:0031072 heat shock protein binding; GO:0051087 chaperone binding; GO:0051879 Hsp90 protein binding; GO:0060589 nucleoside-triphosphatase regulator activity; GO:0060590 ATPase regulator activity; GO:0098772 molecular function regulator;	PF09229	PF09229 Activator of Hsp90 ATPase, N-terminal	S	KOG2936	Uncharacterized conserved protein
Q3ZBV0	Tetraspanin-13 OS=Bos taurus OX=9913 GN=TSPAN13 PE=2 SV=1	TSPAN13	0.571463	Down	22.2193	69324.9	39616.6	1.2727	0.7273	plasma membrane	K17356	TSPAN13_31; tetraspanin-13/31		GO:0007154 cell communication; GO:0007165 signal transduction; GO:0007166 cell surface receptor signaling pathway; GO:0009987 cellular process; GO:0010959 regulation of metal ion transport; GO:0023052 signaling; GO:0032879 regulation of localization; GO:0034762 regulation of transmembrane transport; GO:0034765 regulation of ion transmembrane transport; GO:0043269 regulation of ion transport; GO:0…	GO:0005886 plasma membrane; GO:0005887 integral component of plasma membrane; GO:0016020 membrane; GO:0016021 integral component of membrane; GO:0031224 intrinsic component of membrane; GO:0031226 intrinsic component of plasma membrane; GO:0071944 cell periphery;	GO:0005246 calcium channel regulator activity; GO:0016247 channel regulator activity; GO:0098772 molecular function regulator; GO:0099106 ion channel regulator activity;			R	KOG3882	Tetraspanin family integral membrane protein
Q5E9A9	DET1- and DDB1-associated protein 1 OS=Bos taurus OX=9913 GN=DDA1 PE=3 SV=1	DDA1	0.476199	Down	11.8353	19657	9360.64	1.35483	0.645169	cytoplasm	K11792	DDA1; DET1- and DDB1-associated protein 1		GO:0006464 cellular protein modification process; GO:0006807 nitrogen compound metabolic process; GO:0008152 metabolic process; GO:0009987 cellular process; GO:0019538 protein metabolic process; GO:0036211 protein modification process; GO:0043170 macromolecule metabolic process; GO:0043412 macromolecule modification; GO:0043687 post-translational protein modification; GO:0044237 cellular metaboli…	GO:0000151 ubiquitin ligase complex; GO:0005622 intracellular anatomical structure; GO:0005634 nucleus; GO:0005654 nucleoplasm; GO:0031461 cullin-RING ubiquitin ligase complex; GO:0031974 membrane-enclosed lumen; GO:0031981 nuclear lumen; GO:0032991 protein-containing complex; GO:0043226 organelle; GO:0043227 membrane-bounded organelle; GO:0043229 intracellular organelle; GO:0043231 intracellular…				S	KOG4816	Uncharacterized conserved protein
A0A140T831	Cystatin-B OS=Bos taurus OX=9913 GN=CSTB PE=3 SV=2	CSTB	1.61956	Up	16.3948	103598	167783	0.763488	1.23651	mitochondria	K13907	CSTA_B; cystatin-A/B		GO:0001775 cell activation; GO:0002252 immune effector process; GO:0002263 cell activation involved in immune response; GO:0002274 myeloid leukocyte activation; GO:0002275 myeloid cell activation involved in immune response; GO:0002283 neutrophil activation involved in immune response; GO:0002366 leukocyte activation involved in immune response; GO:0002376 immune system process; GO:0002443 leukoc…	GO:0005576 extracellular region; GO:0005615 extracellular space; GO:0005622 intracellular anatomical structure; GO:0005634 nucleus; GO:0005730 nucleolus; GO:0005737 cytoplasm; GO:0005829 cytosol; GO:0012505 endomembrane system; GO:0030141 secretory granule; GO:0031410 cytoplasmic vesicle; GO:0031974 membrane-enclosed lumen; GO:0031981 nuclear lumen; GO:0031982 vesicle; GO:0031983 vesicle lumen; G…	GO:0002020 protease binding; GO:0004857 enzyme inhibitor activity; GO:0004866 endopeptidase inhibitor activity; GO:0004869 cysteine-type endopeptidase inhibitor activity; GO:0005488 binding; GO:0005515 protein binding; GO:0019899 enzyme binding; GO:0030234 enzyme regulator activity; GO:0030414 peptidase inhibitor activity; GO:0061134 peptidase regulator activity; GO:0061135 endopeptidase regulato…	PF00031	PF00031 Cystatin domain
A0A140T848	Breast cancer anti-estrogen resistance protein 3 homolog OS=Bos taurus OX=9913 GN=BCAR3 PE=4 SV=1	BCAR3	1.59053	Up	92.7367	8395.03	13352.6	0.772042	1.22796	nucleus	K23688	BCAR3, SH2D3B; breast cancer anti-estrogen resistance protein 3		GO:0001654 eye development; GO:0001932 regulation of protein phosphorylation; GO:0001934 positive regulation of protein phosphorylation; GO:0002088 lens development in camera-type eye; GO:0002089 lens morphogenesis in camera-type eye; GO:0007154 cell communication; GO:0007165 signal transduction; GO:0007275 multicellular organism development; GO:0007423 sensory organ development; GO:0009653 anato…		GO:0005085 guanyl-nucleotide exchange factor activity; GO:0005488 binding; GO:0005515 protein binding; GO:0019899 enzyme binding; GO:0030674 protein-macromolecule adaptor activity; GO:0031267 small GTPase binding; GO:0035591 signaling adaptor activity; GO:0051020 GTPase binding; GO:0060090 molecular adaptor activity; GO:0098772 molecular function regulator;	PF00017	PF00017 SH2 domain
A0A3Q1LG13	Vacuolar protein sorting 13 homolog B OS=Bos taurus OX=9913 GN=VPS13B PE=3 SV=1	VPS13B	0.337791	Down	423.521	14676.2	4957.5	1.495	0.504998	cytoplasm	K19526	VPS13B; vacuolar protein sorting-associated protein 13B		GO:0006605 protein targeting; GO:0006623 protein targeting to vacuole; GO:0006810 transport; GO:0006886 intracellular protein transport; GO:0007034 vacuolar transport; GO:0008104 protein localization; GO:0015031 protein transport; GO:0015833 peptide transport; GO:0033036 macromolecule localization; GO:0033365 protein localization to organelle; GO:0034613 cellular protein localization; GO:0042886 …	GO:0016020 membrane; GO:0019898 extrinsic component of membrane;				U	KOG1809	Vacuolar protein sorting-associated protein
A0A3Q1LH42	Dynein axonemal light chain 1 OS=Bos taurus OX=9913 GN=DNAL1 PE=4 SV=1	DNAL1	0.536268	Down	24.9187	4331.17	2322.67	1.30186	0.698144	cytoplasm	K10411	DNAL1; dynein axonemal light chain 1		GO:0000226 microtubule cytoskeleton organization; GO:0001578 microtubule bundle formation; GO:0006996 organelle organization; GO:0007010 cytoskeleton organization; GO:0007017 microtubule-based process; GO:0009987 cellular process; GO:0016043 cellular component organization; GO:0022607 cellular component assembly; GO:0030030 cell projection organization; GO:0030031 cell projection assembly; GO:003…	GO:0005622 intracellular anatomical structure; GO:0005737 cytoplasm; GO:0005856 cytoskeleton; GO:0005858 axonemal dynein complex; GO:0005875 microtubule associated complex; GO:0005929 cilium; GO:0005930 axoneme; GO:0015630 microtubule cytoskeleton; GO:0030286 dynein complex; GO:0032838 plasma membrane bounded cell projection cytoplasm; GO:0032991 protein-containing complex; GO:0036157 outer dynei…	GO:0005488 binding; GO:0005515 protein binding; GO:0008092 cytoskeletal protein binding; GO:0015631 tubulin binding; GO:0043014 alpha-tubulin binding; GO:0045504 dynein heavy chain binding;			T	KOG0531	Protein phosphatase 1, regulatory subunit, and related proteins
A0A3Q1LHQ9	Tumor protein p63-regulated gene 1-like protein OS=Bos taurus OX=9913 GN=TPRG1L PE=3 SV=1	TPRG1L	2.06168	Up	28.1813	5387.37	11107	0.653237	1.34676	cytoplasm					GO:0005622 intracellular anatomical structure; GO:0005737 cytoplasm; GO:0008021 synaptic vesicle; GO:0012505 endomembrane system; GO:0030133 transport vesicle; GO:0031410 cytoplasmic vesicle; GO:0031982 vesicle; GO:0043226 organelle; GO:0043227 membrane-bounded organelle; GO:0043229 intracellular organelle; GO:0045202 synapse; GO:0070382 exocytic vesicle; GO:0097708 intracellular vesicle; GO:0098…	GO:0005488 binding; GO:0005515 protein binding; GO:0042802 identical protein binding;	PF12456	PF12456 Inositol phosphatase
A0A3Q1LIF8	ALS2 C-terminal-like protein OS=Bos taurus OX=9913 GN=ALS2CL PE=4 SV=1	ALS2CL	0.385085	Down	107.627	22066.9	8497.61	1.44396	0.556045	cytoplasm,nucleus				GO:0006996 organelle organization; GO:0007032 endosome organization; GO:0008104 protein localization; GO:0009987 cellular process; GO:0010256 endomembrane system organization; GO:0016043 cellular component organization; GO:0016050 vesicle organization; GO:0033036 macromolecule localization; GO:0051179 localization; GO:0065007 biological regulation; GO:0065009 regulation of molecular function; GO:…	GO:0005622 intracellular anatomical structure; GO:0005737 cytoplasm; GO:0005829 cytosol; GO:0031410 cytoplasmic vesicle; GO:0031982 vesicle; GO:0043226 organelle; GO:0043227 membrane-bounded organelle; GO:0043229 intracellular organelle; GO:0097708 intracellular vesicle;	GO:0005085 guanyl-nucleotide exchange factor activity; GO:0005488 binding; GO:0005515 protein binding; GO:0019899 enzyme binding; GO:0031267 small GTPase binding; GO:0042802 identical protein binding; GO:0051020 GTPase binding; GO:0098772 molecular function regulator;			R	KOG0231	Junctional membrane complex protein Junctophilin and related MORN repeat proteins
A0A3Q1LJR3	Glycosylphosphatidylinositol anchor attachment 1 OS=Bos taurus OX=9913 GN=GPAA1 PE=4 SV=1	GPAA1	1.66317	Up	66.5558	20242.3	33666.3	0.750986	1.24901	plasma membrane	K05289	GAA1; GPI-anchor transamidase subunit GAA1	map00563 Glycosylphosphatidylinositol (GPI)-anchor biosynthesis; map01100 Metabolic pathways	GO:0001654 eye development; GO:0001745 compound eye morphogenesis; GO:0001751 compound eye photoreceptor cell differentiation; GO:0001754 eye photoreceptor cell differentiation; GO:0006464 cellular protein modification process; GO:0006497 protein lipidation; GO:0006505 GPI anchor metabolic process; GO:0006506 GPI anchor biosynthetic process; GO:0006621 protein retention in ER lumen; GO:0006629 li…	GO:0005622 intracellular anatomical structure; GO:0005737 cytoplasm; GO:0005783 endoplasmic reticulum; GO:0005789 endoplasmic reticulum membrane; GO:0005886 plasma membrane; GO:0005887 integral component of plasma membrane; GO:0012505 endomembrane system; GO:0016020 membrane; GO:0016021 integral component of membrane; GO:0030176 integral component of endoplasmic reticulum membrane; GO:0031224 int…	GO:0003824 catalytic activity; GO:0003923 GPI-anchor transamidase activity; GO:0005488 binding; GO:0005515 protein binding; GO:0008092 cytoskeletal protein binding; GO:0015631 tubulin binding; GO:0016787 hydrolase activity; GO:0140096 catalytic activity, acting on a protein;			O	KOG3566	Glycosylphosphatidylinositol anchor attachment protein GAA1
A0A3Q1LKQ6	USP6 N-terminal like OS=Bos taurus OX=9913 GN=USP6NL PE=4 SV=1	USP6NL	0.595429	Down	88.9491	3935.83	2343.51	1.25358	0.746419	nucleus	K20133	USP6NL; USP6 N-terminal-like protein		GO:0006810 transport; GO:0006886 intracellular protein transport; GO:0006996 organelle organization; GO:0007030 Golgi organization; GO:0008104 protein localization; GO:0009987 cellular process; GO:0010256 endomembrane system organization; GO:0015031 protein transport; GO:0015833 peptide transport; GO:0016032 viral process; GO:0016043 cellular component organization; GO:0016192 vesicle-mediated tr…	GO:0000139 Golgi membrane; GO:0005622 intracellular anatomical structure; GO:0005737 cytoplasm; GO:0005794 Golgi apparatus; GO:0005802 trans-Golgi network; GO:0005829 cytosol; GO:0005886 plasma membrane; GO:0012505 endomembrane system; GO:0016020 membrane; GO:0031090 organelle membrane; GO:0031410 cytoplasmic vesicle; GO:0031982 vesicle; GO:0031984 organelle subcompartment; GO:0032588 trans-Golgi…	GO:0005096 GTPase activator activity; GO:0005488 binding; GO:0005515 protein binding; GO:0008047 enzyme activator activity; GO:0019899 enzyme binding; GO:0030234 enzyme regulator activity; GO:0030695 GTPase regulator activity; GO:0031267 small GTPase binding; GO:0051020 GTPase binding; GO:0060589 nucleoside-triphosphatase regulator activity; GO:0098772 molecular function regulator;			R	KOG1102	Rab6 GTPase activator GAPCenA and related TBC domain proteins
[truncated: 117 more rows]

## Sheet: Supplementary Table 2
Supplementary Table 2. Twenty differential metabolites after overexpression of SIRT5 in granulosa cells
Index	Compounds	Class	Q1 (Da)	Q3 (Da)	Molecular Weight	Ion mode	Ionization model	Formula	Control-1	Control-2	Control-3	Control-4	SIRT5-1	SIRT5-2	SIRT5-3	SIRT5-4	MWY223115a_R1	MWY223115a_R2	MWY223115a_R3	cpd_ID	CAS	kegg_map	Control_vs_SIRT5_VIP	Control_vs_SIRT5_Fold_Change	Control_vs_SIRT5_Log2FC	Control_vs_SIRT5_Type
Glutamine	Glutamine	Amino acid derivatives	147.069	84	146.069143	Positive	[M+H]+	C5H10N2O3	45.84617	48.40455	47.98707	46.09516	77.52878	83.62884	97.87173	89.46465	1796.71000	1781.18000	1770.00000	C00064	56-85-9	ko00220,ko00230,ko00240,ko00250,ko00470,ko00630,ko00750,ko00910,ko00970,ko01100,ko01230,ko01232,ko01240,ko02010,ko04724,ko04727,ko04964,ko04974,ko04978,ko05230	1.371744363140711	1.8504143857991924	0.8878483871700085	up
[truncated: 19 more rows]

## Sheet: Supplementary Table 3
Supplementary Table 3. The modification sites and proteins identified by 4D-FastDIA quantitative succinyl proteomics analysis in granulosa cells
Modification sites information											Protein quantitation		Normalized modification sites quantitation
[truncated: 1,547 more rows]

## Sheet: Supplementary Table 4
Supplementary Table 4. Metabolites between granulosa cells in K93+101E and K93+101R groups
[truncated: 51 more rows]

[truncated: 1 more sheets: Supplementary Table 5]
